# Supplementary material
Source: publisher figshare collection journal article supplement (https://acs.figshare.com/ndownloader/files/8208308)
Supplement: Supplementary file 1 [file 8208308]

data_3ai
_audit_creation_date              2016-06-07
_audit_creation_method
;
  Olex2 1.2
  (compiled 2012.05.09 svn.r2324, GUI svn.r4230)
;
_publ_contact_author_address      ?
_publ_contact_author_email        ?
_publ_contact_author_name         ''
_publ_contact_author_phone        ?
_publ_section_references
;
Bourhis, L.J., Dolomanov, O.V., Gildea, R.J., Howard, J.A.K., Puschmann, H.
 (2015). Acta Cryst. A71, 59-75.

Dolomanov, O.V., Bourhis, L.J., Gildea, R.J, Howard, J.A.K. & Puschmann, H.
 (2009), J. Appl. Cryst. 42, 339-341.

Sheldrick, G.M. (2008). Acta Cryst. A64, 112-122.
;
_chemical_name_common             ?
_chemical_name_systematic         AKSIII_099
_chemical_formula_moiety          'C15 H11 Br S'
_chemical_formula_sum             'C15 H11 Br S'
_chemical_formula_weight          303.21
_chemical_absolute_configuration  ad
_chemical_melting_point           ?
_chemical_oxdiff_formula          'C10 H8 N1 O2 S1 Br1'
loop_
  _atom_type_symbol
  _atom_type_description
  _atom_type_scat_dispersion_real
  _atom_type_scat_dispersion_imag
  _atom_type_scat_source
 'C' 'C' 0.0033 0.0016 'International Tables Vol C Tables 4.2.6.8 and 6.1.1.4'
 'H' 'H' 0.0000 0.0000 'International Tables Vol C Tables 4.2.6.8 and 6.1.1.4'
 'Br' 'Br' -0.2901 2.4595
 'International Tables Vol C Tables 4.2.6.8 and 6.1.1.4'
 'S' 'S' 0.1246 0.1234 'International Tables Vol C Tables 4.2.6.8 and 6.1.1.4'

_space_group_crystal_system       'orthorhombic'
_space_group_IT_number            19
_space_group_name_H-M_alt         'P 21 21 21'
_space_group_name_Hall            'P 2ac 2ab'
loop_
  _space_group_symop_operation_xyz
 'x, y, z'
 '-x+1/2, -y, z+1/2'
 'x+1/2, -y+1/2, -z'
 '-x, y+1/2, -z+1/2'

_cell_length_a                    10.9526(7)
_cell_length_b                    11.6626(10)
_cell_length_c                    29.560(2)
_cell_angle_alpha                 90
_cell_angle_beta                  90
_cell_angle_gamma                 90
_cell_volume                      3775.9(5)
_cell_formula_units_Z             12
_cell_measurement_reflns_used     2630
_cell_measurement_temperature     102(3)
_cell_measurement_theta_max       25.0710
_cell_measurement_theta_min       3.2670
_exptl_absorpt_coefficient_mu     3.404
_exptl_absorpt_correction_T_max   0.857
_exptl_absorpt_correction_T_min   0.704
_exptl_absorpt_correction_type    gaussian
_exptl_absorpt_process_details
;
CrysAlisPro 1.171.38.41 (Rigaku Oxford Diffraction, 2015)
Numerical absorption correction based on gaussian integration over
			a multifaceted crystal model
Empirical absorption correction using spherical harmonics,
 implemented in SCALE3 ABSPACK scaling algorithm.
;
_exptl_absorpt_special_details    ?
_exptl_crystal_colour             'clear light colourless'
_exptl_crystal_colour_lustre      clear
_exptl_crystal_colour_modifier    light
_exptl_crystal_colour_primary     colourless
_exptl_crystal_density_diffrn     1.600
_exptl_crystal_density_meas       ?
_exptl_crystal_density_method     ?
_exptl_crystal_description        block
_exptl_crystal_F_000              1824
loop_
  _exptl_crystal_face_index_h
  _exptl_crystal_face_index_k
  _exptl_crystal_face_index_l
  _exptl_crystal_face_perp_dist
 -1 15 16 0.0672
 13 9 1 0.0601
 0 -15 -16 0.0557
 15 2 -7 0.0719
 -15 -2 7 0.0719
 -4 -15 -13 0.0726
 -2 -7 37 0.0235
 2 7 -37 0.0235

_exptl_crystal_size_max           0.171
_exptl_crystal_size_mid           0.124
_exptl_crystal_size_min           0.047
loop_
  _exptl_oxdiff_crystal_face_indexfrac_h
  _exptl_oxdiff_crystal_face_indexfrac_k
  _exptl_oxdiff_crystal_face_indexfrac_l
  _exptl_oxdiff_crystal_face_x
  _exptl_oxdiff_crystal_face_y
  _exptl_oxdiff_crystal_face_z
 -0.8328 15.1609 15.9792 -0.7071 0.0941 0.7008
 12.9693 8.9207 0.8306 -0.9432 0.1239 -0.3083
 0.2050 -15.2373 -15.6573 0.7354 -0.0978 -0.6705
 15.0097 2.0113 -7.0549 -0.6863 0.0995 -0.7123
 -15.0097 -2.0113 7.0549 0.6863 -0.0995 0.7123
 -3.9753 -14.9840 -12.9181 0.8869 -0.1214 -0.4374
 -1.9971 -7.0782 36.8718 0.3943 0.8876 0.2051
 1.9971 7.0782 -36.8718 -0.3943 -0.8876 -0.2051

_exptl_transmission_factor_max    ?
_exptl_transmission_factor_min    ?
_diffrn_reflns_av_R_equivalents   0.0506
_diffrn_reflns_av_unetI/netI      0.1039
_diffrn_reflns_Laue_measured_fraction_full 0.999
_diffrn_reflns_Laue_measured_fraction_max 0.999
_diffrn_reflns_limit_h_max        13
_diffrn_reflns_limit_h_min        -12
_diffrn_reflns_limit_k_max        13
_diffrn_reflns_limit_k_min        -9
_diffrn_reflns_limit_l_max        35
_diffrn_reflns_limit_l_min        -24
_diffrn_reflns_number             11268
_diffrn_reflns_point_group_measured_fraction_full 0.938
_diffrn_reflns_point_group_measured_fraction_max 0.938
_diffrn_reflns_theta_full         25.000
_diffrn_reflns_theta_max          25.000
_diffrn_reflns_theta_min          2.551
_diffrn_ambient_environment       N~2~
_diffrn_ambient_temperature       102(3)
_diffrn_detector                  'CCD plate'
_diffrn_detector_area_resol_mean  8.0419
_diffrn_detector_type             Eos
_diffrn_measured_fraction_theta_full 0.898
_diffrn_measured_fraction_theta_max 0.997
_diffrn_measurement_details
;
List of Runs (angles in degrees, time in seconds):

  # Type    Start    End  Width  t~exp~   \w     \q     \k     \f   Frames
--------------------------------------------------------------------------
  1  \w    -84.00 -44.00   1.00   15.00    --  -11.54 179.00 -60.00   40
  2  \w    -62.00 -27.00   1.00   15.00    --  -11.54 -57.00 -30.00   35
  3  \w    -37.00  41.00   1.00   15.00    --   15.83 -77.00 150.00   78
;
_diffrn_measurement_device        'four-circle diffractometer'
_diffrn_measurement_device_type   'Xcalibur, Eos, Nova'
_diffrn_measurement_method        '\w scans'
_diffrn_orient_matrix_type
'CrysAlisPro convention (1999,Acta A55,543-557)'
_diffrn_orient_matrix_UB_11       -0.0395987000
_diffrn_orient_matrix_UB_12       -0.0480969000
_diffrn_orient_matrix_UB_13       -0.0006827000
_diffrn_orient_matrix_UB_21       0.0191282000
_diffrn_orient_matrix_UB_22       -0.0159743000
_diffrn_orient_matrix_UB_23       0.0220423000
_diffrn_orient_matrix_UB_31       -0.0475239000
_diffrn_orient_matrix_UB_32       0.0336545000
_diffrn_orient_matrix_UB_33       0.0094493000
_diffrn_radiation_monochromator   mirror
_diffrn_radiation_probe           x-ray
_diffrn_radiation_type            MoK\a
_diffrn_radiation_wavelength      0.71073
_diffrn_source                    'micro-focus sealed X-ray tube'
_diffrn_source_type               'Mova (Mo) X-ray Source'
_reflns_Friedel_coverage          0.666
_reflns_Friedel_fraction_full     0.860
_reflns_Friedel_fraction_max      0.860
_reflns_number_gt                 4720
_reflns_number_total              6221
_reflns_odcompleteness_completeness 86.67
_reflns_odcompleteness_iscentric  1
_reflns_odcompleteness_theta      26.32
_reflns_special_details
;
 Reflections were merged by SHELXL according to the crystal
 class for the calculation of statistics and refinement.
 
 _reflns_Friedel_fraction is defined as the number of unique
 Friedel pairs measured divided by the number that would be
 possible theoretically, ignoring centric projections and
 systematic absences.
;
_reflns_threshold_expression      'I > 2\s(I)'
_computing_cell_refinement        'CrysAlisPro 1.171.38.41 (Rigaku OD, 2015)'
_computing_data_collection        'CrysAlisPro 1.171.38.41 (Rigaku OD, 2015)'
_computing_data_reduction         'CrysAlisPro 1.171.38.41 (Rigaku OD, 2015)'
_computing_molecular_graphics
;
O. V. Dolomanov, L. J. Bourhis, R. J. Gildea, J. A. K. Howard and H. Puschmann,
OLEX2: a complete structure solution, refinement and analysis program.
J. Appl. Cryst. (2009). 42, 339-341.
;
_computing_publication_material
;
O. V. Dolomanov, L. J. Bourhis, R. J. Gildea, J. A. K. Howard and H. Puschmann,
OLEX2: a complete structure solution, refinement and analysis program.
J. Appl. Cryst. (2009). 42, 339-341.
;
_computing_structure_refinement
;
SHELXL, G.M. Sheldrick, Acta Cryst.
(2008). A64, 112-122
;
_computing_structure_solution
;
olex2.solve (L.J. Bourhis, O.V. Dolomanov, R.J. Gildea, J.A.K. Howard,
H. Puschmann, in preparation, 2011)
;
_refine_diff_density_max          0.493
_refine_diff_density_min          -0.462
_refine_diff_density_rms          0.105
_refine_ls_abs_structure_details
;
 Flack x determined using 1380 quotients [(I+)-(I-)]/[(I+)+(I-)]
 (Parsons, Flack and Wagner, Acta Cryst. B69 (2013) 249-259).
;
_refine_ls_abs_structure_Flack    0.002(11)
_refine_ls_extinction_coef        .
_refine_ls_extinction_method      none
_refine_ls_goodness_of_fit_ref    0.998
_refine_ls_hydrogen_treatment     constr
_refine_ls_matrix_type            full
_refine_ls_number_parameters      460
_refine_ls_number_reflns          6221
_refine_ls_number_restraints      0
_refine_ls_R_factor_all           0.0842
_refine_ls_R_factor_gt            0.0557
_refine_ls_restrained_S_all       0.998
_refine_ls_shift/su_max           0.001
_refine_ls_shift/su_mean          0.000
_refine_ls_structure_factor_coef  Fsqd
_refine_ls_weighting_details
'w=1/[\s^2^(Fo^2^)+(0.0143P)^2^] where P=(Fo^2^+2Fc^2^)/3'
_refine_ls_weighting_scheme       calc
_refine_ls_wR_factor_gt           0.0797
_refine_ls_wR_factor_ref          0.0892
_refine_special_details           ?
_atom_sites_solution_hydrogens    geom
_atom_sites_solution_primary      iterative
_atom_sites_solution_secondary    ?
loop_
  _atom_site_label
  _atom_site_type_symbol
  _atom_site_fract_x
  _atom_site_fract_y
  _atom_site_fract_z
  _atom_site_U_iso_or_equiv
  _atom_site_adp_type
  _atom_site_occupancy
  _atom_site_site_symmetry_order
  _atom_site_calc_flag
  _atom_site_refinement_flags_posn
  _atom_site_refinement_flags_adp
  _atom_site_refinement_flags_occupancy
  _atom_site_disorder_assembly
  _atom_site_disorder_group
 Br1 Br 0.39509(8) 0.31356(9) 0.61993(4) 0.0327(3) Uani 1 1 d . . . . .
 Br2 Br 0.57698(9) -0.19728(8) 0.54019(3) 0.0290(3) Uani 1 1 d . . . . .
 Br3 Br 0.42960(9) 0.32446(8) 0.28522(3) 0.0300(3) Uani 1 1 d . . . . .
 S4 S 0.7238(2) 0.7470(2) 0.73764(8) 0.0273(6) Uani 1 1 d . . . . .
 S6 S 0.2614(2) 0.2200(2) 0.41833(8) 0.0296(7) Uani 1 1 d . . . . .
 C2AA C 0.4551(8) -0.0922(8) 0.5207(3) 0.022(2) Uani 1 1 d . . . . .
 C4AA C 0.4584(8) 0.0190(7) 0.5366(3) 0.026(2) Uani 1 1 d . . . . .
 H4AA H 0.5171 0.0408 0.5576 0.031 Uiso 1 1 calc R . . . .
 C7BA C 0.6770(7) 0.8622(7) 0.7038(3) 0.016(2) Uani 1 1 d . . . . .
 C9BA C 0.7290(8) 0.8849(8) 0.6607(3) 0.019(2) Uani 1 1 d . . . . .
 C1AA C 0.6017(9) 1.0554(8) 0.6551(3) 0.027(3) Uani 1 1 d . . . . .
 H1AA H 0.5762 1.1190 0.6386 0.033 Uiso 1 1 calc R . . . .
 C0AA C 0.5535(9) 1.0328(7) 0.6970(3) 0.027(3) Uani 1 1 d . . . . .
 H0AA H 0.4980 1.0838 0.7098 0.032 Uiso 1 1 calc R . . . .
 C7AA C 0.5868(8) 0.9354(7) 0.7204(3) 0.026(2) Uani 1 1 d . . . . .
 H7AA H 0.5485 0.9182 0.7476 0.031 Uiso 1 1 calc R . . . .
 S1 S 0.7760(2) 0.7462(2) 0.39941(8) 0.0247(6) Uani 1 1 d . . . . .
 C17 C 0.3730(8) 0.0984(8) 0.5209(3) 0.028(3) Uani 1 1 d . . . . .
 H17 H 0.3747 0.1733 0.5317 0.034 Uiso 1 1 calc R . . . .
 C8AA C 0.2858(8) 0.0666(8) 0.4894(3) 0.024(2) Uani 1 1 d . . . . .
 C4BA C 0.2840(8) -0.0470(8) 0.4746(3) 0.026(3) Uani 1 1 d . . . . .
 H4BA H 0.2256 -0.0696 0.4536 0.032 Uiso 1 1 calc R . . . .
 C6BA C 0.5225(8) 0.5243(8) 0.6271(3) 0.023(2) Uani 1 1 d . . . . .
 H6BA H 0.4681 0.5487 0.6050 0.028 Uiso 1 1 calc R . . . .
 C5AA C 0.5168(8) 0.4145(8) 0.6439(3) 0.022(2) Uani 1 1 d . . . . .
 C8BA C 0.5930(8) 0.3774(8) 0.6774(3) 0.024(2) Uani 1 1 d . . . . .
 H8BA H 0.5864 0.3035 0.6891 0.029 Uiso 1 1 calc R . . . .
 C11 C 0.8255(7) 0.8095(8) 0.6432(3) 0.028(2) Uani 1 1 d . . . . .
 H11 H 0.8713 0.8367 0.6190 0.034 Uiso 1 1 calc R . . . .
 C6 C 0.6106(8) 0.5976(8) 0.6438(3) 0.024(2) Uani 1 1 d . . . . .
 H6 H 0.6173 0.6712 0.6319 0.028 Uiso 1 1 calc R . . . .
 C3AA C 0.6883(9) 0.5640(8) 0.6775(3) 0.023(2) Uani 1 1 d . . . . .
 C9AA C 0.3469(8) 0.3344(8) 0.4412(3) 0.019(2) Uani 1 1 d . . . . .
 C6AA C 0.4427(8) 0.3782(8) 0.4166(3) 0.027(2) Uani 1 1 d . . . . .
 H6AA H 0.4663 0.3416 0.3900 0.033 Uiso 1 1 calc R . . . .
 C14 C 0.3101(8) 0.3874(8) 0.4819(3) 0.022(2) Uani 1 1 d . . . . .
 C0BA C 0.3770(9) 0.4849(8) 0.4951(3) 0.027(3) Uani 1 1 d . . . . .
 H0BA H 0.3559 0.5211 0.5220 0.033 Uiso 1 1 calc R . . . .
 C2CA C 0.5315(8) 0.5464(8) 0.2952(3) 0.024(2) Uani 1 1 d . . . . .
 H2CA H 0.4603 0.5714 0.2812 0.029 Uiso 1 1 calc R . . . .
 C10 C 0.6884(7) 0.8630(8) 0.3808(3) 0.022(2) Uani 1 1 d . . . . .
 C12 C 0.8206(7) 0.6752(8) 0.3458(3) 0.021(2) Uani 1 1 d . . . . .
 H12 H 0.8955 0.6319 0.3518 0.026 Uiso 1 1 calc R . . . .
 C5BA C 0.7256(8) 0.5902(8) 0.3314(3) 0.023(2) Uani 1 1 d . . . . .
 C16 C 0.8504(8) 0.7614(8) 0.3100(3) 0.025(2) Uani 1 1 d . . . . .
 H16 H 0.9101 0.7425 0.2889 0.030 Uiso 1 1 calc R . . . .
 C18 C 0.5517(8) 0.4307(7) 0.3034(3) 0.024(2) Uani 1 1 d . . . . .
 C3BA C 0.6213(8) 0.6235(8) 0.3085(3) 0.023(2) Uani 1 1 d . . . . .
 H3BA H 0.6107 0.7007 0.3018 0.027 Uiso 1 1 calc R . . . .
 C2 C 0.4722(9) 0.5296(8) 0.4701(4) 0.033(3) Uani 1 1 d . . . . .
 H2 H 0.5134 0.5948 0.4799 0.040 Uiso 1 1 calc R . . . .
 C1BA C 0.6547(8) 0.3931(8) 0.3262(3) 0.020(2) Uani 1 1 d . . . . .
 H1BA H 0.6656 0.3157 0.3326 0.024 Uiso 1 1 calc R . . . .
 C2BA C 0.1982(8) 0.1529(8) 0.4692(3) 0.031(3) Uani 1 1 d . . . . .
 H2BA H 0.1251 0.1105 0.4599 0.037 Uiso 1 1 calc R . . . .
 C15 C 0.5051(9) 0.4758(8) 0.4304(4) 0.030(3) Uani 1 1 d . . . . .
 H15 H 0.5687 0.5046 0.4129 0.036 Uiso 1 1 calc R . . . .
 C19 C 0.7850(8) 0.6452(7) 0.6954(3) 0.026(2) Uani 1 1 d . . . . .
 H19 H 0.8453 0.5977 0.7113 0.031 Uiso 1 1 calc R . . . .
 C20 C 0.6810(8) 0.4536(8) 0.6937(3) 0.024(3) Uani 1 1 d . . . . .
 H20 H 0.7356 0.4294 0.7159 0.029 Uiso 1 1 calc R . . . .
 C1CA C 0.5546(9) 1.0557(8) 0.3551(3) 0.028(2) Uani 1 1 d . . . . .
 H1CA H 0.5079 1.1182 0.3460 0.034 Uiso 1 1 calc R . . . .
 C0CA C 0.7411(8) 0.4732(8) 0.3392(3) 0.022(2) Uani 1 1 d . . . . .
 H0CA H 0.8117 0.4482 0.3536 0.026 Uiso 1 1 calc R . . . .
 C4 C 0.6071(8) 0.9133(8) 0.4099(3) 0.025(2) Uani 1 1 d . . . . .
 H4 H 0.5958 0.8817 0.4385 0.030 Uiso 1 1 calc R . . . .
 C7 C 0.5414(8) 1.0104(8) 0.3978(3) 0.028(3) Uani 1 1 d . . . . .
 H7 H 0.4887 1.0446 0.4185 0.033 Uiso 1 1 calc R . . . .
 C8 C 0.6381(9) 1.0070(8) 0.3260(3) 0.025(3) Uani 1 1 d . . . . .
 H8 H 0.6490 1.0398 0.2976 0.030 Uiso 1 1 calc R . . . .
 C9 C 0.7062(9) 0.9115(8) 0.3371(3) 0.023(2) Uani 1 1 d . . . . .
 C13 C 0.7968(8) 0.8635(8) 0.3064(3) 0.021(2) Uani 1 1 d . . . . .
 H13 H 0.8195 0.9086 0.2818 0.025 Uiso 1 1 calc R . . . .
 C1 C 0.1574(8) 0.2434(10) 0.5021(4) 0.036(3) Uani 1 1 d . . . . .
 H1 H 0.0898 0.2266 0.5199 0.044 Uiso 1 1 calc R . . . .
 C3 C 0.3673(8) -0.1271(8) 0.4904(3) 0.027(3) Uani 1 1 d . . . . .
 H3 H 0.3637 -0.2030 0.4808 0.033 Uiso 1 1 calc R . . . .
 C3CA C 0.6895(8) 0.9810(7) 0.6376(3) 0.025(2) Uani 1 1 d . . . . .
 H3CA H 0.7228 0.9967 0.6093 0.030 Uiso 1 1 calc R . . . .
 C5 C 0.2089(8) 0.3445(9) 0.5080(3) 0.033(3) Uani 1 1 d . . . . .
 H5 H 0.1778 0.3914 0.5307 0.040 Uiso 1 1 calc R . . . .
 C4CA C 0.8529(8) 0.7077(8) 0.6587(3) 0.030(3) Uani 1 1 d . . . . .
 H4CA H 0.9198 0.6709 0.6459 0.035 Uiso 1 1 calc R . . . .

loop_
  _atom_site_aniso_label
  _atom_site_aniso_U_11
  _atom_site_aniso_U_22
  _atom_site_aniso_U_33
  _atom_site_aniso_U_23
  _atom_site_aniso_U_13
  _atom_site_aniso_U_12
 Br1 0.0296(5) 0.0270(6) 0.0414(6) -0.0077(6) 0.0013(6) -0.0045(5)
 Br2 0.0302(5) 0.0299(6) 0.0270(5) 0.0038(5) -0.0019(5) 0.0063(5)
 Br3 0.0360(6) 0.0294(6) 0.0247(5) -0.0019(6) -0.0058(5) -0.0059(5)
 S4 0.0395(16) 0.0231(14) 0.0192(13) 0.0005(13) -0.0053(13) 0.0003(13)
 S6 0.0327(14) 0.0299(15) 0.0262(14) 0.0040(13) -0.0103(13) -0.0039(13)
 C2AA 0.020(5) 0.028(6) 0.018(5) 0.004(5) 0.001(5) -0.007(4)
 C4AA 0.034(6) 0.025(6) 0.019(5) -0.007(5) -0.004(5) -0.003(5)
 C7BA 0.018(5) 0.016(5) 0.014(5) -0.002(5) -0.007(5) -0.002(4)
 C9BA 0.018(5) 0.021(5) 0.017(5) -0.001(5) 0.004(5) 0.000(4)
 C1AA 0.036(6) 0.020(6) 0.025(6) -0.004(5) -0.016(6) 0.000(5)
 C0AA 0.031(6) 0.011(5) 0.037(7) -0.011(5) -0.009(6) 0.001(5)
 C7AA 0.030(6) 0.027(6) 0.020(5) -0.005(5) 0.003(5) -0.009(5)
 S1 0.0293(13) 0.0275(15) 0.0173(12) 0.0028(13) -0.0057(12) 0.0007(12)
 C17 0.036(6) 0.020(6) 0.029(6) -0.001(5) 0.004(6) 0.007(5)
 C8AA 0.018(5) 0.024(6) 0.029(6) 0.007(5) 0.000(5) -0.003(5)
 C4BA 0.020(5) 0.029(6) 0.030(6) 0.003(6) -0.004(5) -0.009(5)
 C6BA 0.028(5) 0.024(6) 0.018(6) 0.001(5) -0.007(5) 0.003(5)
 C5AA 0.025(5) 0.020(6) 0.022(6) -0.006(5) 0.006(5) -0.002(5)
 C8BA 0.036(6) 0.011(5) 0.026(6) 0.004(5) 0.008(5) 0.001(5)
 C11 0.024(5) 0.031(6) 0.029(6) -0.003(6) 0.011(5) -0.006(5)
 C6 0.030(6) 0.019(5) 0.021(5) 0.008(5) 0.003(5) 0.005(5)
 C3AA 0.033(6) 0.014(6) 0.023(6) -0.005(5) 0.008(5) 0.006(5)
 C9AA 0.023(5) 0.019(5) 0.014(5) 0.004(5) -0.010(4) -0.003(5)
 C6AA 0.030(6) 0.032(6) 0.021(5) 0.014(5) 0.004(5) -0.002(5)
 C14 0.027(6) 0.019(6) 0.019(6) 0.007(5) -0.004(5) 0.003(5)
 C0BA 0.033(6) 0.032(7) 0.016(6) -0.003(5) -0.009(6) 0.014(5)
 C2CA 0.016(5) 0.035(6) 0.022(6) -0.008(6) 0.004(5) 0.009(5)
 C10 0.019(5) 0.028(6) 0.018(5) -0.005(5) -0.003(5) -0.007(4)
 C12 0.021(5) 0.025(6) 0.019(5) 0.005(5) -0.001(4) 0.002(5)
 C5BA 0.028(6) 0.025(6) 0.015(5) -0.001(5) 0.005(5) 0.002(5)
 C16 0.018(5) 0.035(6) 0.021(5) 0.002(5) 0.007(5) -0.008(5)
 C18 0.030(6) 0.023(6) 0.019(5) 0.005(5) 0.006(5) 0.005(5)
 C3BA 0.030(6) 0.021(5) 0.017(5) 0.004(5) -0.001(5) 0.006(5)
 C2 0.039(6) 0.022(6) 0.039(7) -0.005(6) -0.021(6) -0.002(5)
 C1BA 0.027(6) 0.018(6) 0.015(5) 0.005(5) 0.000(5) 0.005(5)
 C2BA 0.018(5) 0.032(6) 0.042(7) 0.014(6) -0.001(5) -0.001(5)
 C15 0.033(6) 0.029(6) 0.028(6) 0.014(6) 0.005(5) -0.001(5)
 C19 0.037(6) 0.013(5) 0.029(6) -0.003(5) -0.004(5) 0.015(5)
 C20 0.027(6) 0.021(6) 0.024(6) -0.007(5) -0.002(5) 0.006(5)
 C1CA 0.031(6) 0.021(6) 0.031(6) 0.009(5) -0.012(6) 0.011(5)
 C0CA 0.021(5) 0.034(6) 0.011(5) 0.000(5) 0.002(5) 0.005(5)
 C4 0.028(6) 0.034(6) 0.013(5) -0.001(5) -0.001(5) -0.007(5)
 C7 0.026(6) 0.030(6) 0.028(6) -0.015(6) 0.001(5) -0.002(5)
 C8 0.039(7) 0.023(6) 0.014(6) 0.006(5) 0.002(5) -0.014(5)
 C9 0.027(6) 0.021(6) 0.022(6) 0.000(5) 0.003(5) -0.004(5)
 C13 0.018(5) 0.028(6) 0.017(5) 0.001(5) -0.002(5) -0.013(5)
 C1 0.026(6) 0.040(7) 0.043(7) 0.012(6) 0.016(5) 0.008(6)
 C3 0.025(6) 0.025(6) 0.032(6) 0.008(5) 0.002(5) 0.002(5)
 C3CA 0.027(5) 0.023(6) 0.023(6) -0.001(5) -0.003(5) -0.008(5)
 C5 0.033(6) 0.036(7) 0.031(6) 0.012(6) 0.017(6) 0.015(5)
 C4CA 0.021(5) 0.034(6) 0.033(6) -0.005(6) 0.004(5) -0.006(5)

_geom_special_details
;
 All esds (except the esd in the dihedral angle between two l.s. planes)
 are estimated using the full covariance matrix.  The cell esds are taken
 into account individually in the estimation of esds in distances, angles
 and torsion angles; correlations between esds in cell parameters are only
 used when they are defined by crystal symmetry.  An approximate (isotropic)
 treatment of cell esds is used for estimating esds involving l.s. planes.
;
loop_
  _geom_bond_atom_site_label_1
  _geom_bond_atom_site_label_2
  _geom_bond_distance
  _geom_bond_site_symmetry_2
  _geom_bond_publ_flag
 Br1 C5AA 1.914(9) . ?
 Br2 C2AA 1.902(9) . ?
 Br3 C18 1.901(9) . ?
 S4 C7BA 1.752(9) . ?
 S4 C19 1.848(9) . ?
 S6 C9AA 1.764(9) . ?
 S6 C2BA 1.832(10) . ?
 C2AA C4AA 1.379(11) . ?
 C2AA C3 1.375(12) . ?
 C4AA H4AA 0.9300 . ?
 C4AA C17 1.396(12) . ?
 C7BA C9BA 1.419(11) . ?
 C7BA C7AA 1.395(11) . ?
 C9BA C11 1.469(11) . ?
 C9BA C3CA 1.383(11) . ?
 C1AA H1AA 0.9300 . ?
 C1AA C0AA 1.373(13) . ?
 C1AA C3CA 1.395(12) . ?
 C0AA H0AA 0.9300 . ?
 C0AA C7AA 1.379(11) . ?
 C7AA H7AA 0.9300 . ?
 S1 C10 1.755(9) . ?
 S1 C12 1.855(9) . ?
 C17 H17 0.9300 . ?
 C17 C8AA 1.385(12) . ?
 C8AA C4BA 1.395(12) . ?
 C8AA C2BA 1.514(12) . ?
 C4BA H4BA 0.9300 . ?
 C4BA C3 1.387(11) . ?
 C6BA H6BA 0.9300 . ?
 C6BA C5AA 1.374(11) . ?
 C6BA C6 1.380(12) . ?
 C5AA C8BA 1.367(12) . ?
 C8BA H8BA 0.9300 . ?
 C8BA C20 1.397(11) . ?
 C11 H11 0.9300 . ?
 C11 C4CA 1.307(11) . ?
 C6 H6 0.9300 . ?
 C6 C3AA 1.369(12) . ?
 C3AA C19 1.516(12) . ?
 C3AA C20 1.376(11) . ?
 C9AA C6AA 1.375(11) . ?
 C9AA C14 1.412(12) . ?
 C6AA H6AA 0.9300 . ?
 C6AA C15 1.388(12) . ?
 C14 C0BA 1.408(12) . ?
 C14 C5 1.441(12) . ?
 C0BA H0BA 0.9300 . ?
 C0BA C2 1.379(13) . ?
 C2CA H2CA 0.9300 . ?
 C2CA C18 1.389(11) . ?
 C2CA C3BA 1.389(11) . ?
 C10 C4 1.371(12) . ?
 C10 C9 1.423(12) . ?
 C12 H12 0.9800 . ?
 C12 C5BA 1.498(12) . ?
 C12 C16 1.495(11) . ?
 C5BA C3BA 1.383(12) . ?
 C5BA C0CA 1.394(11) . ?
 C16 H16 0.9300 . ?
 C16 C13 1.332(12) . ?
 C18 C1BA 1.385(12) . ?
 C3BA H3BA 0.9300 . ?
 C2 H2 0.9300 . ?
 C2 C15 1.381(13) . ?
 C1BA H1BA 0.9300 . ?
 C1BA C0CA 1.384(12) . ?
 C2BA H2BA 0.9800 . ?
 C2BA C1 1.503(13) . ?
 C15 H15 0.9300 . ?
 C19 H19 0.9800 . ?
 C19 C4CA 1.505(12) . ?
 C20 H20 0.9300 . ?
 C1CA H1CA 0.9300 . ?
 C1CA C7 1.378(12) . ?
 C1CA C8 1.379(12) . ?
 C0CA H0CA 0.9300 . ?
 C4 H4 0.9300 . ?
 C4 C7 1.389(12) . ?
 C7 H7 0.9300 . ?
 C8 H8 0.9300 . ?
 C8 C9 1.380(12) . ?
 C9 C13 1.457(12) . ?
 C13 H13 0.9300 . ?
 C1 H1 0.9300 . ?
 C1 C5 1.318(13) . ?
 C3 H3 0.9300 . ?
 C3CA H3CA 0.9300 . ?
 C5 H5 0.9300 . ?
 C4CA H4CA 0.9300 . ?

loop_
  _geom_angle_atom_site_label_1
  _geom_angle_atom_site_label_2
  _geom_angle_atom_site_label_3
  _geom_angle
  _geom_angle_site_symmetry_1
  _geom_angle_site_symmetry_3
  _geom_angle_publ_flag
 C7BA S4 C19 102.3(4) . . ?
 C9AA S6 C2BA 102.1(5) . . ?
 C4AA C2AA Br2 118.9(7) . . ?
 C3 C2AA Br2 119.8(7) . . ?
 C3 C2AA C4AA 121.2(9) . . ?
 C2AA C4AA H4AA 120.2 . . ?
 C2AA C4AA C17 119.5(9) . . ?
 C17 C4AA H4AA 120.2 . . ?
 C9BA C7BA S4 122.5(7) . . ?
 C7AA C7BA S4 118.3(7) . . ?
 C7AA C7BA C9BA 119.1(8) . . ?
 C7BA C9BA C11 119.5(8) . . ?
 C3CA C9BA C7BA 118.0(8) . . ?
 C3CA C9BA C11 122.4(9) . . ?
 C0AA C1AA H1AA 120.6 . . ?
 C0AA C1AA C3CA 118.7(9) . . ?
 C3CA C1AA H1AA 120.6 . . ?
 C1AA C0AA H0AA 119.7 . . ?
 C1AA C0AA C7AA 120.6(9) . . ?
 C7AA C0AA H0AA 119.7 . . ?
 C7BA C7AA H7AA 119.5 . . ?
 C0AA C7AA C7BA 121.0(9) . . ?
 C0AA C7AA H7AA 119.5 . . ?
 C10 S1 C12 102.8(4) . . ?
 C4AA C17 H17 119.7 . . ?
 C8AA C17 C4AA 120.5(9) . . ?
 C8AA C17 H17 119.7 . . ?
 C17 C8AA C4BA 118.4(9) . . ?
 C17 C8AA C2BA 121.6(9) . . ?
 C4BA C8AA C2BA 119.9(9) . . ?
 C8AA C4BA H4BA 119.2 . . ?
 C3 C4BA C8AA 121.6(9) . . ?
 C3 C4BA H4BA 119.2 . . ?
 C5AA C6BA H6BA 120.6 . . ?
 C5AA C6BA C6 118.7(9) . . ?
 C6 C6BA H6BA 120.6 . . ?
 C6BA C5AA Br1 118.1(7) . . ?
 C8BA C5AA Br1 119.9(7) . . ?
 C8BA C5AA C6BA 122.0(9) . . ?
 C5AA C8BA H8BA 121.0 . . ?
 C5AA C8BA C20 118.0(9) . . ?
 C20 C8BA H8BA 121.0 . . ?
 C9BA C11 H11 117.1 . . ?
 C4CA C11 C9BA 125.8(9) . . ?
 C4CA C11 H11 117.1 . . ?
 C6BA C6 H6 119.4 . . ?
 C3AA C6 C6BA 121.1(9) . . ?
 C3AA C6 H6 119.4 . . ?
 C6 C3AA C19 120.7(9) . . ?
 C6 C3AA C20 119.1(9) . . ?
 C20 C3AA C19 120.2(9) . . ?
 C6AA C9AA S6 118.9(7) . . ?
 C6AA C9AA C14 120.4(9) . . ?
 C14 C9AA S6 120.4(7) . . ?
 C9AA C6AA H6AA 119.2 . . ?
 C9AA C6AA C15 121.6(9) . . ?
 C15 C6AA H6AA 119.2 . . ?
 C9AA C14 C5 121.7(9) . . ?
 C0BA C14 C9AA 116.2(9) . . ?
 C0BA C14 C5 122.1(9) . . ?
 C14 C0BA H0BA 118.3 . . ?
 C2 C0BA C14 123.4(9) . . ?
 C2 C0BA H0BA 118.3 . . ?
 C18 C2CA H2CA 121.1 . . ?
 C3BA C2CA H2CA 121.1 . . ?
 C3BA C2CA C18 117.8(9) . . ?
 C4 C10 S1 119.3(8) . . ?
 C4 C10 C9 119.3(9) . . ?
 C9 C10 S1 121.2(7) . . ?
 S1 C12 H12 107.0 . . ?
 C5BA C12 S1 110.8(6) . . ?
 C5BA C12 H12 107.0 . . ?
 C16 C12 S1 111.2(6) . . ?
 C16 C12 H12 107.0 . . ?
 C16 C12 C5BA 113.3(7) . . ?
 C3BA C5BA C12 121.8(8) . . ?
 C3BA C5BA C0CA 117.1(9) . . ?
 C0CA C5BA C12 121.1(8) . . ?
 C12 C16 H16 117.9 . . ?
 C13 C16 C12 124.2(9) . . ?
 C13 C16 H16 117.9 . . ?
 C2CA C18 Br3 118.2(7) . . ?
 C1BA C18 Br3 120.3(7) . . ?
 C1BA C18 C2CA 121.5(9) . . ?
 C2CA C3BA H3BA 118.6 . . ?
 C5BA C3BA C2CA 122.8(9) . . ?
 C5BA C3BA H3BA 118.6 . . ?
 C0BA C2 H2 120.7 . . ?
 C0BA C2 C15 118.7(10) . . ?
 C15 C2 H2 120.7 . . ?
 C18 C1BA H1BA 120.7 . . ?
 C0CA C1BA C18 118.5(9) . . ?
 C0CA C1BA H1BA 120.7 . . ?
 S6 C2BA H2BA 107.1 . . ?
 C8AA C2BA S6 111.6(6) . . ?
 C8AA C2BA H2BA 107.1 . . ?
 C1 C2BA S6 110.1(7) . . ?
 C1 C2BA C8AA 113.6(8) . . ?
 C1 C2BA H2BA 107.1 . . ?
 C6AA C15 H15 120.2 . . ?
 C2 C15 C6AA 119.7(10) . . ?
 C2 C15 H15 120.2 . . ?
 S4 C19 H19 106.6 . . ?
 C3AA C19 S4 112.5(6) . . ?
 C3AA C19 H19 106.6 . . ?
 C4CA C19 S4 110.8(6) . . ?
 C4CA C19 C3AA 113.3(8) . . ?
 C4CA C19 H19 106.6 . . ?
 C8BA C20 H20 119.5 . . ?
 C3AA C20 C8BA 121.0(9) . . ?
 C3AA C20 H20 119.5 . . ?
 C7 C1CA H1CA 120.5 . . ?
 C7 C1CA C8 118.9(9) . . ?
 C8 C1CA H1CA 120.5 . . ?
 C5BA C0CA H0CA 118.9 . . ?
 C1BA C0CA C5BA 122.1(9) . . ?
 C1BA C0CA H0CA 118.9 . . ?
 C10 C4 H4 119.2 . . ?
 C10 C4 C7 121.6(9) . . ?
 C7 C4 H4 119.2 . . ?
 C1CA C7 C4 119.7(9) . . ?
 C1CA C7 H7 120.2 . . ?
 C4 C7 H7 120.2 . . ?
 C1CA C8 H8 118.6 . . ?
 C1CA C8 C9 122.9(9) . . ?
 C9 C8 H8 118.6 . . ?
 C10 C9 C13 120.5(9) . . ?
 C8 C9 C10 117.5(9) . . ?
 C8 C9 C13 122.0(9) . . ?
 C16 C13 C9 126.4(9) . . ?
 C16 C13 H13 116.8 . . ?
 C9 C13 H13 116.8 . . ?
 C2BA C1 H1 117.0 . . ?
 C5 C1 C2BA 125.9(10) . . ?
 C5 C1 H1 117.0 . . ?
 C2AA C3 C4BA 118.7(9) . . ?
 C2AA C3 H3 120.7 . . ?
 C4BA C3 H3 120.7 . . ?
 C9BA C3CA C1AA 122.4(9) . . ?
 C9BA C3CA H3CA 118.8 . . ?
 C1AA C3CA H3CA 118.8 . . ?
 C14 C5 H5 117.7 . . ?
 C1 C5 C14 124.6(10) . . ?
 C1 C5 H5 117.7 . . ?
 C11 C4CA C19 125.4(9) . . ?
 C11 C4CA H4CA 117.3 . . ?
 C19 C4CA H4CA 117.3 . . ?

loop_
  _geom_torsion_atom_site_label_1
  _geom_torsion_atom_site_label_2
  _geom_torsion_atom_site_label_3
  _geom_torsion_atom_site_label_4
  _geom_torsion
  _geom_torsion_site_symmetry_1
  _geom_torsion_site_symmetry_2
  _geom_torsion_site_symmetry_3
  _geom_torsion_site_symmetry_4
  _geom_torsion_publ_flag
 Br1 C5AA C8BA C20 179.6(6) . . . . ?
 Br2 C2AA C4AA C17 177.0(7) . . . . ?
 Br2 C2AA C3 C4BA -176.1(7) . . . . ?
 Br3 C18 C1BA C0CA -179.5(7) . . . . ?
 S4 C7BA C9BA C11 0.3(12) . . . . ?
 S4 C7BA C9BA C3CA -177.1(6) . . . . ?
 S4 C7BA C7AA C0AA 174.5(7) . . . . ?
 S4 C19 C4CA C11 -33.3(12) . . . . ?
 S6 C9AA C6AA C15 173.0(7) . . . . ?
 S6 C9AA C14 C0BA -174.0(6) . . . . ?
 S6 C9AA C14 C5 5.4(12) . . . . ?
 S6 C2BA C1 C5 -33.2(14) . . . . ?
 C2AA C4AA C17 C8AA -0.4(14) . . . . ?
 C4AA C2AA C3 C4BA 2.6(14) . . . . ?
 C4AA C17 C8AA C4BA 1.4(14) . . . . ?
 C4AA C17 C8AA C2BA -175.4(8) . . . . ?
 C7BA S4 C19 C3AA -89.6(7) . . . . ?
 C7BA S4 C19 C4CA 38.4(7) . . . . ?
 C7BA C9BA C11 C4CA 15.6(14) . . . . ?
 C7BA C9BA C3CA C1AA 0.2(13) . . . . ?
 C9BA C7BA C7AA C0AA -4.3(13) . . . . ?
 C9BA C11 C4CA C19 4.3(16) . . . . ?
 C1AA C0AA C7AA C7BA 5.2(14) . . . . ?
 C0AA C1AA C3CA C9BA 0.7(13) . . . . ?
 C7AA C7BA C9BA C11 179.0(8) . . . . ?
 C7AA C7BA C9BA C3CA 1.6(13) . . . . ?
 S1 C10 C4 C7 175.8(7) . . . . ?
 S1 C10 C9 C8 -176.6(6) . . . . ?
 S1 C10 C9 C13 1.1(12) . . . . ?
 S1 C12 C5BA C3BA 81.8(10) . . . . ?
 S1 C12 C5BA C0CA -100.3(9) . . . . ?
 S1 C12 C16 C13 -32.5(11) . . . . ?
 C17 C8AA C4BA C3 -0.4(15) . . . . ?
 C17 C8AA C2BA S6 88.8(10) . . . . ?
 C17 C8AA C2BA C1 -36.3(13) . . . . ?
 C8AA C4BA C3 C2AA -1.6(14) . . . . ?
 C8AA C2BA C1 C5 92.8(13) . . . . ?
 C4BA C8AA C2BA S6 -87.9(10) . . . . ?
 C4BA C8AA C2BA C1 147.0(9) . . . . ?
 C6BA C5AA C8BA C20 -1.9(14) . . . . ?
 C6BA C6 C3AA C19 179.8(8) . . . . ?
 C6BA C6 C3AA C20 2.6(14) . . . . ?
 C5AA C6BA C6 C3AA -2.4(14) . . . . ?
 C5AA C8BA C20 C3AA 2.1(13) . . . . ?
 C11 C9BA C3CA C1AA -177.1(8) . . . . ?
 C6 C6BA C5AA Br1 -179.4(7) . . . . ?
 C6 C6BA C5AA C8BA 2.1(14) . . . . ?
 C6 C3AA C19 S4 81.8(10) . . . . ?
 C6 C3AA C19 C4CA -44.9(12) . . . . ?
 C6 C3AA C20 C8BA -2.4(14) . . . . ?
 C3AA C19 C4CA C11 94.3(11) . . . . ?
 C9AA S6 C2BA C8AA -86.1(7) . . . . ?
 C9AA S6 C2BA C1 41.0(7) . . . . ?
 C9AA C6AA C15 C2 1.1(14) . . . . ?
 C9AA C14 C0BA C2 1.1(13) . . . . ?
 C9AA C14 C5 C1 13.5(15) . . . . ?
 C6AA C9AA C14 C0BA -0.3(12) . . . . ?
 C6AA C9AA C14 C5 179.1(8) . . . . ?
 C14 C9AA C6AA C15 -0.7(13) . . . . ?
 C14 C0BA C2 C15 -0.8(14) . . . . ?
 C0BA C14 C5 C1 -167.1(10) . . . . ?
 C0BA C2 C15 C6AA -0.4(14) . . . . ?
 C2CA C18 C1BA C0CA -2.7(14) . . . . ?
 C10 S1 C12 C5BA -87.9(7) . . . . ?
 C10 S1 C12 C16 39.1(7) . . . . ?
 C10 C4 C7 C1CA 2.1(14) . . . . ?
 C10 C9 C13 C16 15.7(14) . . . . ?
 C12 S1 C10 C4 158.5(7) . . . . ?
 C12 S1 C10 C9 -26.0(8) . . . . ?
 C12 C5BA C3BA C2CA -179.5(8) . . . . ?
 C12 C5BA C0CA C1BA -180.0(8) . . . . ?
 C12 C16 C13 C9 3.3(15) . . . . ?
 C5BA C12 C16 C13 93.1(11) . . . . ?
 C16 C12 C5BA C3BA -44.0(12) . . . . ?
 C16 C12 C5BA C0CA 133.8(9) . . . . ?
 C18 C2CA C3BA C5BA -3.3(14) . . . . ?
 C18 C1BA C0CA C5BA 2.1(14) . . . . ?
 C3BA C2CA C18 Br3 -179.9(6) . . . . ?
 C3BA C2CA C18 C1BA 3.3(14) . . . . ?
 C3BA C5BA C0CA C1BA -2.0(14) . . . . ?
 C2BA S6 C9AA C6AA 155.8(7) . . . . ?
 C2BA S6 C9AA C14 -30.5(8) . . . . ?
 C2BA C8AA C4BA C3 176.4(9) . . . . ?
 C2BA C1 C5 C14 3.5(18) . . . . ?
 C19 S4 C7BA C9BA -25.1(8) . . . . ?
 C19 S4 C7BA C7AA 156.2(7) . . . . ?
 C19 C3AA C20 C8BA -179.6(8) . . . . ?
 C20 C3AA C19 S4 -101.0(9) . . . . ?
 C20 C3AA C19 C4CA 132.3(9) . . . . ?
 C1CA C8 C9 C10 -0.3(14) . . . . ?
 C1CA C8 C9 C13 -178.0(9) . . . . ?
 C0CA C5BA C3BA C2CA 2.6(14) . . . . ?
 C4 C10 C9 C8 -1.1(13) . . . . ?
 C4 C10 C9 C13 176.6(8) . . . . ?
 C7 C1CA C8 C9 2.6(15) . . . . ?
 C8 C1CA C7 C4 -3.4(14) . . . . ?
 C8 C9 C13 C16 -166.7(9) . . . . ?
 C9 C10 C4 C7 0.2(13) . . . . ?
 C3 C2AA C4AA C17 -1.6(14) . . . . ?
 C3CA C9BA C11 C4CA -167.2(9) . . . . ?
 C3CA C1AA C0AA C7AA -3.3(14) . . . . ?
 C5 C14 C0BA C2 -178.3(9) . . . . ?

_olex2_refinement_description
;
1. Fixed Uiso
 At 1.2 times of:
  All C(H) groups
2.a Ternary CH refined with riding coordinates:
 C12(H12), C2BA(H2BA), C19(H19)
2.b Aromatic/amide H refined with riding coordinates:
 C4AA(H4AA), C1AA(H1AA), C0AA(H0AA), C7AA(H7AA), C17(H17), C4BA(H4BA),
 C6BA(H6BA), C8BA(H8BA), C11(H11), C6(H6), C6AA(H6AA), C0BA(H0BA), C2CA(H2CA),
 C16(H16), C3BA(H3BA), C2(H2), C1BA(H1BA), C15(H15), C20(H20), C1CA(H1CA),
 C0CA(H0CA), C4(H4), C7(H7), C8(H8), C13(H13), C1(H1), C3(H3), C3CA(H3CA),
 C5(H5), C4CA(H4CA)
;
_olex2_submission_special_instructions 'No special instructions were received'
_oxdiff_exptl_absorpt_empirical_details
;
Empirical correction (ABSPACK) includes:
- Absorption correction using spherical harmonics
- Frame scaling
- Detector area scaling
;
_oxdiff_exptl_absorpt_empirical_full_max 1.642
_oxdiff_exptl_absorpt_empirical_full_min 0.845
_shelx_estimated_absorpt_T_max    ?
_shelx_estimated_absorpt_T_min    ?
_shelx_hkl_checksum               3954
_shelx_hkl_file
;
   0   0   4 405.489 94.6609   1
   0   0   5 265.300 117.761   1
   0   0   6 90606.0 1322.30   1
   0   0   7 412.336 205.070   1
   0   0   8 210.011 118.086   1
   0   0   9 9.93286 121.514   1
   0   0  10 19006.7 793.197   1
   0   0  11 228.578 182.033   1
   0   0  12 43387.4 1308.58   1
   0   0  13 239.337 212.652   1
   0   0  14 768.476 260.397   1
   0   0  15 116.230 201.894   1
   0   0  16 18911.0 1018.61   1
   0   0  17 162.868 213.900   1
   0   0  18 93.7734 191.259   1
   0   0  19 337.893 277.467   1
   0   0  20 388.475 247.689   1
   0   0  21 150.317 188.103   1
   0   0  22 238.003 267.365   1
   0   0  23 393.443 314.351   1
   0   0  24 17199.0 1247.95   1
   0   0  24 15252.4 1258.48   3
   0   0  25 655.398 361.090   1
   0   0  25 796.782 330.451   3
   0   0  26 4156.08 659.640   1
   0   0  26 4053.87 694.660   3
   0   0  27 205.936 249.863   3
   0   0  27 224.287 266.472   1
   0   0  28 1424.97 467.698   1
   0   0  28 1288.18 450.264   3
   0   0  29-183.289 241.919   1
   0   0  29 398.164 407.028   3
   0   0  30 342.471 289.821   3
   0   0  30 568.718 334.859   1
   0   0  31-336.936 336.424   3
   0   0  31 521.470 318.185   1
   0   0  32-251.561 403.730   3
   0   0  33-215.799 277.331   3
   0   0  34 485.642 490.438   3
   0   0  35 101.418 344.515   3
   0  -1  -3 568.789 113.570   3
   0   1   3 817.352 127.105   3
   0  -1  -4 1203.63 170.077   3
   0   1   4 1241.10 170.777   3
   0   1   5 6907.58 399.898   3
   0  -1  -5 6926.47 359.964   1
   0  -1  -5 6889.50 412.819   3
   0   1   6 116537. 1778.51   3
   0  -1  -6 117666. 1602.05   1
   0  -1  -7 933.169 184.530   1
   0   1   7 1113.87 223.956   3
   0  -1  -8 498.220 160.978   1
   0   1   8 922.151 243.664   3
   0  -1  -9 55028.2 1336.14   1
   0   1   9 54145.1 1264.95   1
   0   1   9 56119.2 1456.25   3
   0   1  10 1638.92 290.484   1
   0   1  10 1907.17 351.339   3
   0  -1 -10 1423.44 246.097   1
   0   1  11 3630.54 436.172   3
   0   1  11 3674.84 380.162   1
   0  -1 -11 3913.36 401.595   1
   0  -1 -12 7689.07 611.792   1
   0   1  12 8351.97 648.955   3
   0   1  12 8072.40 583.720   1
   0  -1  13 8413.21 644.749   1
   0   1  13 8444.65 596.521   1
   0  -1 -13 7650.65 614.688   1
   0   1  13 8809.59 700.289   3
   0   1  14 2065.30 356.193   1
   0   1  14 2058.42 418.248   3
   0  -1  14 2027.61 373.285   1
   0  -1 -14 1177.09 259.387   1
   0   1  15 49160.2 1536.28   1
   0  -1 -15 48702.0 1641.20   1
   0   1  15 50516.4 1732.03   3
   0  -1  15 55231.5 1772.86   1
   0  -1  16 1509.82 358.101   1
   0   1  16 2634.81 471.716   3
   0   1  16 2725.91 426.650   1
   0  -1 -16 1729.64 355.749   1
   0  -1  17 2717.84 467.805   1
   0   1  17 2944.20 479.436   3
   0   1  17 3076.46 451.170   1
   0   1  18 18906.1 1172.52   3
   0   1  18 17876.7 1028.93   1
   0  -1  18 18275.5 1152.49   1
   0  -1  19 339.964 279.429   1
   0   1  19 562.885 258.164   1
   0   1  19 639.187 301.092   3
   0   1  20 2351.84 460.205   1
   0  -1  20 2370.37 497.015   1
   0   1  20 3026.90 610.997   3
   0   1  21 68126.0 2424.73   3
   0   1  21 65710.9 2196.42   1
   0  -1  21 68640.6 2341.39   1
   0  -1  22 2780.10 545.774   1
   0   1  22 2811.69 569.585   3
   0   1  22 2623.22 532.213   1
   0  -1  23 9094.95 885.607   1
   0   1  23 9095.14 958.539   3
   0   1  23 9759.18 895.146   1
   0   1  24 263.145 307.899   3
   0  -1  24-178.171 272.493   1
   0   1  25 3452.81 665.330   3
   0  -1  25 2535.89 556.184   1
   0  -1  26 723.179 356.313   1
   0   1  26 762.232 439.400   3
   0  -1  27 34.8308 273.821   1
   0   1  27 610.558 374.410   3
   0  -1  28-21.9305 320.724   1
   0   1  28 348.799 356.102   3
   0   1  29 9856.30 1136.20   3
   0  -1  29 8724.03 1075.86   1
   0  -1  29 8244.15 1037.57   3
   0  -1  30 630.403 355.241   1
   0  -1  30 180.695 268.063   3
   0   1  30 653.539 417.789   3
   0  -1  31 4784.76 831.699   1
   0   1  31 5000.28 905.851   3
   0  -1  31 5125.05 871.190   3
   0  -1  32 814.155 419.874   3
   0   1  32 1205.77 516.525   3
   0  -1  32 1274.49 531.231   1
   0  -1  33 5263.04 957.290   3
   0   1  33 7201.64 1103.06   3
   0  -1  33 6334.39 950.496   1
   0  -1  34 797.459 497.479   3
   0   1  34 234.655 350.799   3
   0   1  35 2057.64 658.387   3
   0  -1  35 1685.87 569.038   3
   0   2   0 33100.3 839.309   3
   0  -2   0 31030.3 840.698   3
   0   2  -1 870.449 146.732   3
   0  -2   1 1166.88 175.306   3
   0  -2  -1 1014.32 168.127   3
   0  -2  -1 1199.73 124.987   2
   0   2   1 1318.75 183.210   3
   0  -2  -2 471.476 147.597   3
   0   2   2 358.741 134.532   3
   0  -2   2 386.208 124.730   3
   0   2  -2 111.433 93.1689   3
   0  -2  -3 34631.0 958.243   3
   0  -2   3 34704.8 913.437   3
   0   2   3 34014.6 936.845   3
   0   2   4 572.250 170.485   3
   0  -2  -4 613.738 156.274   3
   0  -2  -5 2418.32 272.440   3
   0   2   5 2465.64 267.719   3
   0  -2  -6 81894.1 1683.80   3
   0   2   6 81945.3 1696.03   3
   0  -2  -7-31.9443 112.714   3
   0   2   7 102.261 143.598   3
   0   2   8 7089.81 544.705   3
   0  -2  -8 8241.76 576.150   3
   0   2   9 38125.9 1329.25   3
   0  -2  -9 40081.0 1212.98   1
   0   2  10 607.630 266.275   3
   0  -2 -10 256.951 149.644   1
   0  -2 -11 513.115 145.920   1
   0   2  11 507.123 245.670   3
   0  -2 -12 17324.1 946.058   1
   0   2  12 19858.4 1060.39   3
   0  -2 -13 1171.45 291.105   1
   0   2  13 1254.58 332.180   3
   0   2  14 4885.91 602.316   3
   0  -2 -14 4262.82 514.243   1
   0   2  15 27820.5 1372.67   3
   0  -2 -15 25449.0 1245.80   1
   0   2  16 2047.99 452.948   3
   0  -2 -16 1618.70 358.413   1
   0  -2 -17 214.041 215.443   1
   0   2  17 291.763 204.012   3
   0  -2 -18 2812.01 504.698   1
   0   2  18 2797.26 491.320   3
   0  -2 -19 2372.34 481.097   1
   0  -2  19 4022.79 614.045   1
   0   2  19 3925.32 572.619   3
   0   2  20-135.819 251.627   3
   0  -2 -20 225.544 241.868   1
   0  -2  20-7.88437 278.093   1
   0  -2  21 3047.10 536.384   1
   0  -2 -21 2271.33 485.375   1
   0   2  21 2725.31 561.310   3
   0  -2  22 1885.06 460.537   1
   0   2  22 1633.60 429.516   3
   0   2  23 1557.16 472.667   3
   0  -2  23 1934.37 509.325   1
   0  -2  24 9343.63 990.265   1
   0   2  24 9711.60 1048.70   3
   0   2  25 2706.04 623.390   3
   0  -2  25 2109.65 581.714   1
   0  -2  26 4919.70 795.578   1
   0   2  26 4380.01 757.052   3
   0  -2  27 7499.70 970.996   1
   0   2  27 7801.57 1008.35   3
   0  -2  28 1589.92 481.962   1
   0   2  28 1183.41 484.326   3
   0   2  29 844.502 457.320   3
   0  -2  29-255.579 309.363   1
   0  -2  30 2169.32 577.019   1
   0   2  30 243.458 371.135   3
   0   2  31 2510.63 630.561   3
   0  -2  31 3375.40 679.660   1
   0   2  32-187.605 314.871   3
   0  -2  32-261.369 407.642   1
   0   2  33-237.492 337.848   3
   0  -2  33 465.292 410.515   3
   0  -2  33 222.376 387.586   1
   0  -2  34 271.752 476.771   3
   0   2  34-142.566 292.559   3
   0   3   0-95.6726 135.963   3
   0   3   0 51.3167 55.6194   2
   0   3  -1 2978.93 326.324   3
   0  -3   1 3219.27 344.592   3
   0  -3  -1 2761.96 208.705   2
   0  -3  -1 3149.23 345.816   3
   0   3  -1 2869.53 183.577   2
   0   3   1 2772.66 318.807   3
   0   3   2 1545.91 268.505   3
   0   3  -2 1409.29 232.896   3
   0  -3  -2 1410.65 231.061   3
   0  -3   2 1735.44 258.892   3
   0  -3  -2 1515.74 172.506   2
   0  -3   3 3160.21 336.269   3
   0  -3  -3 3568.72 374.797   3
   0   3   3 3681.12 388.117   3
   0   3   4 1838.07 303.600   3
   0  -3   4 2461.12 303.398   3
   0  -3  -4 2558.35 337.596   3
   0  -3   5 1835.60 282.303   3
   0  -3  -5 2397.82 329.689   3
   0   3   5 2037.10 321.793   3
   0  -3  -6 95119.4 2049.33   3
   0   3   6 94717.2 2022.44   3
   0   3   7-184.148 135.057   3
   0  -3  -7 128.489 135.980   3
   0   3   8-51.1740 138.699   3
   0  -3  -8-29.0997 126.565   3
   0   3   9 5872.54 584.666   3
   0  -3  -9 6795.51 609.878   3
   0  -3 -10 1485.52 323.189   3
   0   3  10 1098.06 264.460   3
   0   3  11 2837.26 450.018   3
   0  -3 -11 3053.45 445.734   3
   0   3  12 8268.81 772.426   3
   0  -3 -12 9424.13 714.616   1
   0  -3 -13 1068.43 258.944   1
   0   3  13 981.710 256.872   3
   0   3  14 3261.43 503.299   3
   0  -3 -14 2452.10 419.788   1
   0  -3 -15 15493.1 1037.14   1
   0   3  15 15642.5 1105.72   3
   0  -3 -16 890.361 279.477   1
   0   3  16 1265.85 395.033   3
   0  -3 -17 150.943 187.353   1
   0   3  17 792.393 406.995   3
   0  -3 -18 45841.1 1899.64   1
   0   3  18 45357.1 2005.80   3
   0   3  19 436.115 377.625   3
   0  -3 -19-66.0864 236.291   1
   0   3  20 134.055 257.557   3
   0  -3 -20 144.850 216.310   1
   0  -3 -21 24280.9 1471.85   1
   0   3  21 25508.1 1607.13   3
   0   3  22 2910.24 594.495   3
   0  -3  23 7671.23 961.655   1
   0   3  23 6398.65 885.400   3
   0  -3  24 13217.4 1247.99   1
   0   3  24 15753.0 1330.77   3
   0   3  25 502.779 367.029   3
   0  -3  25 557.825 420.831   1
   0  -3  26 4550.37 786.623   1
   0   3  26 4288.76 757.166   3
   0   3  27 386.370 417.303   3
   0  -3  27 333.749 406.077   1
   0  -3  28 1206.30 512.387   1
   0   3  28 682.749 411.280   3
   0   3  29 5323.82 910.434   3
   0  -3  29 5736.94 904.512   1
   0  -3  30 3880.45 779.296   1
   0   3  30 4242.25 834.597   3
   0   3  31-126.715 311.009   3
   0  -3  31-40.6886 330.521   1
   0   3  32 105.675 340.682   3
   0  -3  32-655.727 452.459   1
   0   3  33 1029.11 452.747   3
   0  -3  33 888.885 437.298   1
   0   3  34 2643.22 780.157   3
   0   4   0 549.106 192.767   3
   0  -4   0 690.553 215.456   3
   0   4   1 646.721 235.062   3
   0  -4  -1 832.595 237.397   3
   0   4  -1 730.562 114.813   2
   0  -4  -1 1054.47 159.448   2
   0  -4   1 1172.59 254.918   3
   0   4  -1 504.825 190.319   3
   0  -4  -2 5396.12 518.697   3
   0   4   2 5811.69 534.365   3
   0   4  -2 4991.39 464.936   3
   0  -4   2 5099.17 488.881   3
   0  -4  -2 4989.08 329.258   2
   0   4   3 155278. 2692.72   3
   0  -4  -3 152061. 1906.51   2
   0   4  -3 155192. 2547.85   3
   0  -4   3 158905. 2708.52   3
   0  -4  -3 163271. 2816.50   3
   0  -4  -4 664.677 241.828   3
   0  -4   4 724.076 221.813   3
   0   4   4 725.637 258.646   3
   0  -4   5 1072.91 233.262   3
   0  -4  -5 890.181 229.363   3
   0   4   5 605.944 229.539   3
   0  -4  -6 31996.9 1343.32   3
   0  -4   6 30683.7 1253.01   3
   0   4   6 31570.1 1300.74   3
   0   4   7 614.759 192.087   3
   0  -4   7 832.634 267.096   3
   0  -4  -7 594.660 175.151   3
   0  -4  -8 4266.04 523.576   3
   0   4   8 4236.74 518.616   3
   0   4   9 26786.4 1330.24   3
   0  -4  -9 26660.5 1316.20   3
   0  -4 -10 904.810 243.033   3
   0   4  10 1321.43 344.374   3
   0  -4 -11 437.271 231.745   3
   0   4  11 493.566 273.675   3
   0  -4 -12 2118.71 404.986   3
   0   4  12 2434.60 465.926   3
   0   4  13 10682.0 933.092   3
   0  -4 -13 9501.83 868.695   3
   0   4  14 7267.96 806.271   3
   0  -4 -14 7128.60 709.420   1
   0  -4 -15 38238.7 1700.58   1
   0   4  15 41422.1 1872.00   3
   0  -4 -16 391.050 258.700   1
   0   4  16 251.387 402.669   3
   0  -4 -17 491.278 232.855   1
   0   4  17 627.772 287.959   3
   0  -4 -18 1214.90 368.428   1
   0   4  18 937.354 385.229   3
   0  -4 -19 4416.53 671.890   1
   0   4  19 5438.75 726.762   3
   0   4  20 2388.83 549.391   3
   0   4  21 8518.29 979.864   3
   0   4  22 3371.40 658.185   3
   0   4  23 9406.26 1064.57   3
   0   4  24-90.0039 350.356   3
   0   4  25 2411.46 584.075   3
   0  -4  26 2526.66 638.869   1
   0   4  26 2158.86 568.684   3
   0  -4  27 19076.4 1628.39   1
   0   4  27 22377.9 1762.99   3
   0   4  28 644.722 413.252   3
   0  -4  28 417.722 368.438   1
   0   4  29 499.879 479.645   3
   0  -4  29-143.533 324.581   1
   0   4  30 7163.81 1090.81   3
   0  -4  30 6890.11 1055.62   1
   0   4  31 2203.86 621.300   3
   0  -4  31 2002.82 629.978   1
   0  -4  32 385.901 408.239   1
   0   4  32-88.5496 320.359   3
   0   4  33 568.577 484.614   3
   0  -4  33 864.370 464.805   1
   0   5   0-88.1796 160.272   3
   0  -5   0 30.4093 127.967   3
   0   5  -1 1861.96 336.785   3
   0   5   1 2351.58 386.387   3
   0  -5  -1 1705.27 374.506   3
   0  -5   1 2109.70 383.043   3
   0   5  -1 2627.43 249.602   2
   0   5  -2 107.887 93.1413   2
   0  -5  -2 114.466 102.604   2
   0  -5   2 78.5696 166.105   3
   0  -5  -2 104.132 149.252   3
   0   5   2-24.3144 181.330   3
   0   5  -2 93.1164 136.561   3
   0   5  -3 602.359 200.929   3
   0  -5   3 781.930 263.038   3
   0   5   3 449.672 233.582   3
   0  -5  -3 685.115 269.307   3
   0  -5  -3 733.266 164.936   2
   0  -5   4 313.803 175.926   3
   0  -5  -4 545.346 205.884   3
   0  -5  -4 536.672 172.676   2
   0   5   4 489.397 206.304   3
   0   5   5 339.588 224.250   3
   0  -5  -5 254.270 214.108   3
   0  -5   5 222.916 215.029   3
   0   5   6 66706.6 2064.70   3
   0  -5  -6 66388.6 2133.93   3
   0  -5   6 70624.1 2102.41   3
   0  -5   7 9912.32 811.845   3
   0  -5  -7 10363.3 865.670   3
   0   5   7 10080.5 840.427   3
   0   5   8 9643.52 814.644   3
   0  -5   8 10391.5 862.087   3
   0  -5  -8 9346.46 822.308   3
   0   5   9 32683.5 1538.99   3
   0  -5   9 31418.8 1475.41   3
   0  -5  -9 29662.9 1504.64   3
   0  -5 -10 5168.70 657.769   3
   0  -5  10 5131.26 613.025   3
   0   5  10 5782.84 699.119   3
   0   5  11 10925.7 953.531   3
   0   5  12 18203.9 1247.99   3
   0   5  13 609.107 333.742   3
   0   5  14 80.8741 307.631   3
   0   5  15 20085.1 1397.68   3
   0   5  16 468.796 392.841   3
   0  -5 -16 118.870 225.230   1
   0   5  17 2518.87 592.093   3
   0   5  18 57227.0 2465.56   3
   0   5  19 841.044 500.686   3
   0   5  20 4236.72 708.743   3
   0   5  21 6418.74 929.430   3
   0   5  22-122.283 282.245   3
   0   5  23 2419.30 632.638   3
   0   5  24 4404.84 862.253   3
   0   5  25 9214.07 1153.64   3
   0   5  26 5607.63 946.060   3
   0   5  27 1967.82 617.128   3
   0   5  28-316.219 413.755   3
   0  -5  28 279.690 353.167   1
   0   5  29 1703.88 435.702   3
   0  -5  29 1872.31 594.274   1
   0  -5  30 7976.39 1110.57   1
   0   5  30 9246.22 1256.60   3
   0   5  31 1097.75 571.937   3
   0  -5  31 217.717 393.386   1
   0   5  32 4313.08 909.266   3
   0  -5  32 2168.36 737.705   1
   0   6   0 9092.63 795.160   3
   0  -6   0 9818.02 861.911   3
   0   6   1 2990.13 495.211   3
   0   6  -1 3235.79 484.494   3
   0  -6   1 3616.48 528.825   3
   0  -6  -1 3513.34 513.617   3
   0   6  -2 136.172 173.139   3
   0   6  -2 168.763 83.2371   2
   0  -6  -2 364.355 254.420   3
   0  -6   2 488.934 264.255   3
   0  -6  -2 274.977 128.260   2
   0   6   2 62.6119 174.149   3
   0   6  -3 43236.0 998.596   2
   0  -6  -3 44220.6 1193.34   2
   0  -6  -3 43465.0 1846.31   3
   0   6  -3 36905.6 1534.16   3
   0   6   3 40603.6 1721.98   3
   0  -6   3 42237.5 1770.61   3
   0   6   4 204.421 202.362   3
   0  -6  -4 682.085 175.897   2
   0   6  -4 364.087 123.855   2
   0  -6  -4 736.031 275.689   3
   0  -6   4 427.795 272.858   3
   0   6   5 3731.80 560.001   3
   0  -6   5 4025.23 573.516   3
   0  -6  -5 5237.44 673.341   3
   0  -6  -5 4253.79 411.911   2
   0  -6  -6 177.164 169.731   3
   0  -6   6 187.528 221.288   3
   0   6   6 273.915 272.293   3
   0  -6  -6 102.661 114.025   2
   0  -6   7 2235.51 429.503   3
   0   6   7 1053.74 322.878   3
   0  -6   8 255.712 215.516   3
   0   6   8 128.597 265.467   3
   0  -6   9 6521.10 758.385   3
   0   6   9 7047.32 793.516   3
   0   6  10 430.363 319.013   3
   0  -6  10 731.418 311.759   3
   0  -6  11 8205.39 852.150   3
   0   6  11 9267.51 975.860   3
   0   6  12 76916.7 2671.78   3
   0  -6  12 71617.5 2501.09   3
   0  -6  13 370.240 276.750   3
   0   6  13 561.082 358.023   3
   0   6  14 2495.83 507.824   3
   0  -6  14 1859.07 435.484   3
   0   6  15 4030.49 700.747   3
   0   6  16-113.949 268.715   3
   0   6  17 728.934 412.722   3
   0   6  18 10394.6 1147.17   3
   0   6  19 3421.85 694.393   3
   0   6  20 2752.76 671.904   3
   0   6  21 6282.15 970.538   3
   0   6  22 2126.03 620.247   3
   0   6  23 1171.51 496.375   3
   0   6  24 11828.4 1320.50   3
   0   6  25 230.776 376.262   3
   0   6  26 642.491 460.721   3
   0   6  27 4931.81 935.458   3
   0   6  28 4420.69 940.099   3
   0   6  29 3492.04 839.231   3
   0   6  30 3259.29 788.479   3
   0   6  31 536.024 518.399   3
   0  -6  31 1064.29 582.665   1
   0  -7   0 161.293 207.436   3
   0   7   0 159.915 218.370   3
   0   7  -1 4755.31 658.572   3
   0  -7   1 5916.17 749.409   3
   0   7   1 5069.02 654.361   3
   0   7  -2 2263.20 456.857   3
   0   7   2 2088.82 439.546   3
   0  -7   2 2480.16 510.285   3
   0  -7  -3 50695.4 1368.18   2
   0   7  -3 50187.5 1193.99   2
   0   7   3 49107.3 2029.77   3
   0   7  -3 48415.2 1912.58   3
   0  -7   3 47316.8 2041.40   3
   0   7   4 726.267 311.349   3
   0  -7  -4 388.671 166.103   2
   0  -7   4 448.625 248.971   3
   0   7  -4 373.064 132.480   2
   0   7  -5-135.856 129.747   2
   0   7   5 228.448 302.869   3
   0  -7   5-47.8523 173.853   3
   0  -7  -5 25.1737 111.014   2
   0   7   6 9843.66 968.375   3
   0  -7   6 8853.76 922.163   3
   0  -7  -6 9718.44 669.565   2
   0   7   7 8089.83 897.479   3
   0  -7  -7 7678.60 633.822   2
   0  -7   7 7852.77 867.340   3
   0   7   8 5605.42 733.306   3
   0  -7  -8 5381.71 549.125   2
   0  -7   8 6166.02 792.544   3
   0   7   9 47685.8 2139.06   3
   0  -7   9 47373.8 2191.69   3
   0   7  10 3144.82 579.982   3
   0  -7  10 2675.27 603.185   3
   0   7  11 286.534 292.952   3
   0  -7  11 5.42231 222.185   3
   0   7  12 3421.50 654.201   3
   0  -7  12 3243.78 602.403   3
   0   7  13 577.165 299.823   3
   0   7  14 1340.22 462.321   3
   0   7  15 869.413 446.225   3
   0   7  16 6348.94 917.557   3
   0   7  17 5253.72 880.055   3
   0   7  18 3549.84 736.470   3
   0   7  19 8667.46 1077.87   3
   0   7  20 834.120 497.029   3
   0   7  21 4531.63 828.171   3
   0   7  22 314.206 363.310   3
   0   7  23 2315.55 577.803   3
   0   7  24 228.241 398.097   3
   0   7  25 73.0240 561.562   3
   0   7  26 1267.57 569.773   3
   0   7  27 316.825 331.027   3
   0   7  28 152.093 413.782   3
   0   7  29 1034.26 615.299   3
   0   7  30 1052.21 650.864   3
   0   8   0 19229.1 1334.69   3
   0   8  -1 3722.85 602.321   3
   0   8   1 4405.13 665.668   3
   0   8  -2 367.110 307.130   3
   0   8   2 485.859 306.864   3
   0   8  -3 1032.20 374.228   3
   0   8   3 1771.49 448.007   3
   0  -8  -4 315.076 177.549   2
   0   8  -4 631.029 152.196   2
   0   8   4 340.386 310.785   3
   0   8   5 6579.54 834.238   3
   0   8  -5 6564.72 460.793   2
   0  -8  -5 7288.87 594.887   2
   0   8   6 725.028 358.642   3
   0  -8  -6 481.259 158.974   2
   0   8  -6 378.894 138.680   2
   0  -8  -7 579.360 238.334   2
   0   8   7 588.963 377.514   3
   0   8   8 14.9889 269.534   3
   0  -8  -8 91.5595 140.654   2
   0  -8  -9 628.838 265.603   2
   0   8   9 1136.43 447.634   3
   0   8  10 3279.41 665.972   3
   0  -8 -10 3144.34 493.410   2
   0   8  11 367.835 411.610   3
   0  -8 -11 526.143 298.194   2
   0   8  12 55647.0 2559.12   3
   0   8  13 3335.21 755.966   3
   0   8  14 1588.15 576.430   3
   0   8  15 1045.02 479.618   3
   0   8  16 4119.84 808.880   3
   0   8  17 963.150 488.913   3
   0   8  18 3592.01 772.137   3
   0   8  19 51.1655 288.893   3
   0   8  20 2633.80 733.219   3
   0   8  21 2943.02 704.851   3
   0   8  22 160.616 306.612   3
   0   8  23 1071.57 430.209   3
   0   8  24 11746.9 1437.89   3
   0   8  25 605.585 508.065   3
   0   8  26 996.598 532.127   3
   0   8  27 595.013 460.755   3
   0   8  28 2485.00 779.292   3
   0   9   0 200.487 313.057   3
   0   9  -1-199.181 307.797   3
   0   9   1 109.433 296.483   3
   0   9  -2 319.603 239.420   3
   0   9   2 200.461 378.229   3
   0   9   3 21699.8 1511.36   3
   0   9  -3 18638.8 1402.95   3
   0   9   4 4933.14 723.340   3
   0   9   5 3946.45 691.216   3
   0   9  -5 3068.91 331.378   2
   0   9   6 4627.17 751.316   3
   0   9  -6 4771.16 419.250   2
   0  -9  -6 5751.46 593.493   2
   0  -9  -7 571.942 251.941   2
   0   9  -7 555.303 153.720   2
   0   9   7 234.532 294.918   3
   0   9   8 13808.4 1317.96   3
   0  -9  -8 12182.0 899.092   2
   0   9  -8 11337.3 674.132   2
   0  -9  -9 43714.1 1740.99   2
   0   9   9 41455.6 2276.66   3
   0  -9 -10 1084.61 312.798   2
   0   9  10 992.074 546.888   3
   0  -9 -11 182.228 184.127   2
   0   9  11 593.908 416.864   3
   0   9  12 9896.88 1108.60   3
   0   9  13 501.850 349.988   3
   0   9  14 488.098 323.343   3
   0   9  15 7388.53 1061.27   3
   0   9  16 1829.41 587.060   3
   0   9  17 2578.95 705.458   3
   0   9  18 3493.07 763.546   3
   0   9  19 312.343 325.236   3
   0   9  20 984.054 585.296   3
   0   9  21 2066.75 671.127   3
   0   9  22 989.206 435.829   3
   0   9  23 4737.75 905.008   3
   0   9  24 1966.29 660.719   3
   0   9  25-570.031 599.754   3
   0   9  26 130.699 422.476   3
   0  10   0 3306.03 673.727   3
   0  10   1 2138.86 587.210   3
   0  10  -1 373.649 322.569   3
   0  10   2 10281.4 1148.50   3
   0  10  -2 9602.34 1090.54   3
   0  10   3 6352.95 901.373   3
   0  10   4 4062.44 782.943   3
   0  10   5 2525.77 684.544   3
   0  10   6 2177.87 625.626   3
   0  10   7 802.591 463.517   3
   0  10  -7 395.885 141.908   2
   0  10  -8 59.2129 142.018   2
   0  10   8-64.0233 343.498   3
   0  10   9 12192.3 1322.70   3
   0  10  -9 10626.5 677.673   2
   0  10 -10 5330.88 511.697   2
   0  10  10 6971.70 1014.85   3
   0  10  11 357.533 369.757   3
   0  10  12 4762.08 891.011   3
   0  10  13 654.205 500.714   3
   0  10  14 1436.37 565.832   3
   0  10  15 6442.08 1038.45   3
   0  10  16 1179.79 540.127   3
   0  10  17 3542.89 775.724   3
   0  10  18 201.479 395.866   3
   0  10  19 5.28669 386.498   3
   0  10  20 3903.41 932.412   3
   0  10  21 475.317 397.523   3
   0  10  22 911.319 544.838   3
   0  10  23 44.1236 500.774   3
   0  10  24 7573.66 1216.19   3
   0  11   0 265.310 330.640   3
   0  11   1 450.042 338.549   3
   0  11  -1 231.583 324.762   3
   0  11   2 243.066 340.083   3
   0  11  -2 338.282 306.761   3
   0  11   3 3161.06 699.326   3
   0  11   4-101.448 307.800   3
   0  11   5 3874.44 798.847   3
   0  11   6 23165.1 1842.93   3
   0  11   7 1157.95 616.959   3
   0  11   8-96.2446 395.334   3
   0  11   9 1059.27 469.863   3
   0  11  10-52.6047 314.039   3
   0  11  11 8800.54 1231.37   3
   0  11  12 128.583 308.460   3
   0  11  13 1531.08 592.823   3
   0  11  14 2076.67 687.070   3
   0  11  15 954.526 469.147   3
   0  11  16 1668.34 642.339   3
   0  11  17 4388.13 984.763   3
   0  11  18 1689.65 620.502   3
   0  11  19 2014.75 678.997   3
   0  11  20 774.359 483.763   3
   0  11  21 115.024 374.786   3
   0  12   0 769.775 438.842   3
   0  12  -1 151.688 323.246   3
   0  12   1 563.378 465.981   3
   0  12   2 4558.95 917.628   3
   0  12   3 3823.91 815.846   3
   0  12   4 1031.93 482.275   3
   0  12   5 2199.71 675.931   3
   0  12   6 2147.40 666.095   3
   0  12   7-105.658 322.847   3
   0  12   8 3243.32 803.946   3
   0  12   9 5426.02 992.920   3
   0  12  10 1377.77 588.802   3
   0  12  11 1448.33 583.258   3
   0  12  12-114.950 366.485   3
   0  12  13 567.622 522.605   3
   0  12  14 1928.53 674.782   3
   0  12  15 15301.8 1692.22   3
   0  12  16 5.83530 357.883   3
   0  12  17 441.710 444.616   3
   0  13   0-106.497 395.040   3
   0  13   1 278.722 344.390   3
   0  13   2 118.566 342.897   3
   0  13   3-394.447 491.890   3
   0  13   4 125.795 399.541   3
   0  13   5 4745.01 983.427   3
   0  13   6 10104.1 1368.74   3
   0  13   7 860.746 505.746   3
   0  13   8 2422.28 732.112   3
   0  13   9 1585.02 718.172   3
   0  13  10 129.704 460.656   3
   0  13  11 1662.41 615.262   3
   0  13  12 534.773 496.650   3
   1   0  -3 45927.5 930.679   1
  -1   0   3 44922.3 912.711   1
  -1   0   4 2848.10 286.051   1
   1   0  -4 2300.15 235.849   1
   1   0  -4 2423.34 159.282   3
   1   0  -5 4239.03 348.494   1
  -1   0   5 3782.27 224.861   3
  -1   0   5 4429.41 377.435   1
  -1   0   6 142556. 1998.01   1
   1   0  -6 136308. 1995.53   1
  -1   0   6 136496. 1519.53   3
   1   0   6 134544. 1132.28   1
   1   0  -7 2969.97 349.601   1
  -1   0   7 3709.58 416.026   1
   1   0   7 3329.90 244.556   1
  -1   0   7 2405.25 232.587   3
  -1   0   8 892.688 298.368   1
   1   0   8 1066.96 178.455   1
  -1   0   8 855.879 196.462   3
  -1   0   9 110102. 2030.08   1
   1   0   9 105368. 1415.58   1
  -1   0   9 110029. 1733.69   3
  -1   0  10 10195.4 587.009   3
   1   0  10 9724.69 494.021   1
  -1   0  10 9574.67 683.376   1
  -1   0  11 5428.11 451.603   3
  -1   0  11 4688.73 493.161   1
   1   0  11 5103.95 375.974   1
   1   0  12 33255.0 983.198   1
  -1   0  12 34551.9 1306.41   1
  -1   0  12 35496.3 1173.17   3
   1   0  13 338.335 194.209   1
  -1   0  13 214.901 242.924   1
  -1   0  13 426.596 226.855   3
  -1   0  14 6984.74 595.983   3
  -1   0  14 7364.13 661.745   1
   1   0  14 6026.44 488.948   1
  -1   0  15 72037.0 1901.42   3
   1   0  15 70051.6 1676.78   1
  -1   0  15 68566.6 2012.87   1
   1   0  16 13816.1 793.886   1
  -1   0  16 13181.7 863.273   3
  -1   0  16 13682.1 968.310   1
   1   0  17 104.921 170.231   1
  -1   0  17-41.5756 176.303   1
  -1   0  17 278.853 191.063   3
  -1   0  18 1796.78 381.408   3
  -1   0  18 1742.97 411.187   1
   1   0  18 1826.47 312.171   1
  -1   0  19 8400.04 771.031   3
  -1   0  19 7067.73 773.023   1
   1   0  19 7674.74 661.252   1
   1   0  20 11998.4 853.098   1
  -1   0  20 10768.7 956.939   1
  -1   0  20 10569.3 891.838   3
  -1   0  21 8035.70 835.737   1
   1   0  21 8525.33 740.435   1
  -1   0  21 8523.41 829.271   3
   1   0  22 465.777 221.012   1
  -1   0  22 590.104 310.741   1
  -1   0  22 1252.78 386.551   3
  -1   0  23 2737.64 530.180   3
  -1   0  23 1912.00 480.639   1
   1   0  23 2134.51 426.368   1
  -1   0  24 186.583 302.576   3
   1   0  24 25.3695 181.454   1
  -1   0  24-54.5274 270.339   1
  -1   0  25 6471.86 822.124   3
   1   0  25 5610.98 688.359   1
  -1   0  25 4867.16 730.765   1
   1   0  26 756.456 292.721   1
  -1   0  26 710.611 397.848   3
  -1   0  26 913.879 427.000   1
  -1   0  27 12425.8 1173.06   1
  -1   0  27 11509.9 1132.07   3
   1   0  27 11567.5 1003.33   1
  -1   0  28 774.306 345.853   1
   1   0  28 589.234 400.759   1
  -1   0  28 304.025 327.869   3
   1   0  29 157.408 318.598   3
  -1   0  29 368.203 377.713   3
  -1   0  29 392.161 356.874   1
  -1   0  30 5759.50 872.206   1
   1   0  30 5590.90 938.227   3
  -1   0  30 7407.60 986.786   3
  -1   0  31 2539.34 618.108   3
   1   0  31 1778.29 610.305   3
  -1   0  31 1943.05 515.309   1
  -1   0  32 1086.20 561.996   1
  -1   0  32 1040.11 449.099   3
   1   0  32 1833.12 583.711   3
   1   0  33-191.685 446.824   3
  -1   0  33 473.803 332.809   1
  -1   0  33-195.610 294.483   3
  -1   0  34-170.527 256.258   3
   1   0  34 592.098 377.070   3
  -1   0  35 781.563 375.387   3
   1   0  35 767.155 389.533   3
  -1   1  35 2186.66 602.832   3
   1  -1  34 2299.14 732.872   3
  -1   1  34 2764.83 680.110   3
   1  -1  33 954.457 459.192   3
  -1   1  33 1528.20 535.820   3
  -1   1  32 289.764 333.019   3
   1  -1  32 298.309 344.894   1
  -1   1  31 2574.79 666.543   3
   1  -1  31 1856.59 481.633   1
   1  -1  30 5424.84 804.505   1
  -1   1  30 5848.66 871.860   3
   1  -1  29 76.6599 277.810   1
  -1   1  29 268.655 334.691   3
  -1   1  28 296.408 313.715   3
   1  -1  28 359.747 333.100   1
  -1   1  27 4182.13 696.267   3
   1  -1  27 4606.38 714.777   1
  -1   1  26 2042.36 574.456   1
  -1   1  26 1025.30 444.322   3
   1  -1  26 674.622 344.212   1
  -1   1  25 44.0577 250.128   1
  -1   1  25 511.950 305.702   3
   1  -1  25 458.470 286.846   1
  -1   1  24 8585.07 935.538   1
   1  -1  24 7760.69 803.775   1
  -1   1  24 6957.79 848.632   3
  -1   1  23 2626.62 520.577   3
  -1   1  23 2639.11 530.150   1
   1  -1  23 2330.96 443.526   1
  -1   1  22 3772.02 643.245   3
   1  -1  22 3947.56 558.043   1
  -1   1  22 3838.01 636.522   1
  -1   1  21 5027.57 672.928   1
   1  -1  21 4923.96 588.461   1
  -1   1  21 5344.73 705.614   3
  -1   1  20 1531.46 405.711   1
   1  -1  20 1669.38 379.471   1
  -1   1  20 2176.05 451.273   3
  -1   1  19 756.446 375.957   1
   1  -1  19 924.291 322.256   1
  -1   1  19 810.720 309.850   3
  -1   1  18 39559.6 1653.02   1
   1  -1  18 38599.6 1499.85   1
  -1   1  18 40154.7 1687.80   3
   1  -1  17 2160.61 386.515   1
  -1   1  17 2597.43 478.328   1
  -1   1  17 3633.58 543.330   3
   1  -1  16-5.81889 158.261   1
  -1   1  16 418.456 267.395   1
  -1   1  16 488.697 286.285   3
   1  -1  15 35763.9 1290.48   1
  -1   1  15 34376.0 1409.70   1
  -1   1  15 34859.3 1423.85   3
  -1   1  14 5685.36 592.568   3
   1  -1  14 4081.06 453.181   1
  -1   1  14 4321.38 511.017   1
  -1  -1 -14 3956.61 421.453   1
  -1   1  13 1299.00 315.830   1
  -1  -1 -13 1063.50 217.578   1
  -1   1  13 1396.18 328.274   3
  -1  -1 -12 13315.5 662.796   1
  -1   1  12 13135.2 803.729   1
  -1   1  12 14698.2 830.857   3
  -1   1  11 114.316 179.225   1
  -1   1  11-13.4769 143.971   3
  -1  -1 -11 41.4992 88.3477   1
  -1  -1 -10 3638.95 311.890   1
  -1   1  10 3608.57 395.753   3
  -1   1  10 4423.09 511.662   1
  -1  -1  -9 110368. 1594.53   1
  -1   1   9 105506. 1915.77   3
  -1   1   9 102216. 1989.11   1
  -1  -1  -8 8181.18 420.473   1
  -1   1   8 8536.60 575.049   1
  -1   1   8 8401.87 524.954   3
  -1   1   7 5841.05 455.390   1
  -1  -1  -7 5736.83 320.230   1
  -1   1   7 4861.25 370.905   3
  -1   1   6 156696. 2150.40   1
  -1   1   6 152546. 1905.16   3
  -1   1   5 780.744 173.994   1
  -1   1   5 885.828 165.336   3
  -1   1   4 4973.77 312.593   3
  -1   1   3 29437.6 726.811   3
  -1  -1  -2 431.202 93.2721   2
  -1   1   2 636.257 113.372   3
  -1   1   1-45.0338 77.1130   3
   1   1   0 3217.77 221.372   2
   1   1   1 151.156 78.5317   2
   1  -1  -1 66.7272 72.7976   3
   1   1   2 527.017 116.485   2
   1  -1  -2 717.472 127.874   3
   1  -1  -3 21901.9 685.984   1
   1  -1  -3 20814.8 610.181   3
   1  -1  -4 5639.39 334.062   3
   1  -1  -4 5759.30 382.022   1
   1  -1  -5 895.319 175.329   1
   1  -1  -5 709.428 145.262   3
   1  -1  -6 137804. 2102.29   1
   1  -1  -6 149164. 1891.71   3
   1  -1  -7 5679.26 455.523   1
   1  -1  -7 5019.12 374.477   3
   1  -1  -8 9048.36 526.892   3
   1  -1  -8 9090.04 596.171   1
   1  -1  -9 100199. 2052.54   1
   1  -1 -10 2807.97 362.506   1
  -1  -1  11-128.466 219.565   1
   1  -1 -11 168.721 164.207   1
  -1  -1  12 13303.5 881.167   1
   1  -1 -12 14554.1 907.365   1
   1  -1 -13 1564.87 338.203   1
  -1  -1  13 1522.90 355.515   1
   1  -1 -14 5598.71 607.120   1
  -1  -1  14 5209.30 578.030   1
   1  -1 -15 29020.3 1416.71   1
  -1  -1  15 29612.1 1434.64   1
  -1  -1  16 99.0874 226.007   1
   1  -1 -16 153.880 208.477   1
   1  -1 -17 2382.45 441.080   1
  -1  -1  17 3006.05 572.319   1
  -1  -1  18 32841.7 1628.44   1
  -1  -1  19 497.966 305.851   1
  -1  -1  20 1639.55 424.565   1
  -1  -1  21 5498.47 758.988   1
  -1  -1  22 3462.98 642.681   1
   1   1  23 2406.35 551.836   3
  -1  -1  23 1389.26 462.114   1
  -1  -1  24 7248.55 891.363   1
   1   1  24 6421.79 879.560   3
  -1  -1  24 6935.04 794.420   3
  -1  -1  25 446.309 256.869   3
   1   1  25 537.476 310.098   3
  -1  -1  25 110.403 310.583   1
  -1  -1  26 1347.78 443.017   3
   1   1  26 1410.98 487.723   3
  -1  -1  26 1175.56 448.696   1
   1   1  27 3961.83 744.647   3
  -1  -1  27 5024.86 814.686   1
  -1  -1  27 5494.46 763.616   3
  -1  -1  28 436.495 323.528   3
   1   1  28 205.712 318.709   3
  -1  -1  28 533.815 451.473   1
  -1  -1  29 206.695 356.340   3
  -1  -1  29-39.4467 276.755   1
   1   1  29 54.6373 329.612   3
  -1  -1  30 6405.04 1002.97   1
  -1  -1  30 5057.38 803.908   3
   1   1  30 5582.76 960.154   3
  -1  -1  31 2235.56 599.767   3
   1   1  31 2482.68 702.868   3
  -1  -1  31 3327.46 710.424   1
   1   1  32 1661.89 600.546   3
  -1  -1  32 1552.52 520.118   3
  -1  -1  32 668.865 395.503   1
  -1  -1  33 1382.09 512.359   3
   1   1  33 1863.13 631.028   3
  -1  -1  33 2138.44 589.381   1
  -1  -1  34 1024.66 471.687   3
  -1  -1  34 2291.17 689.264   1
   1   1  34 1010.28 507.576   3
  -1   2  34 296.113 272.830   3
  -1   2  33 1356.31 535.959   3
  -1   2  32 2325.70 676.706   3
   1  -2  31 2938.88 607.086   1
  -1   2  31 2519.79 661.180   3
  -1   2  30 6902.06 1030.67   3
   1  -2  30 5892.06 851.862   1
  -1   2  29 1048.57 454.694   3
   1  -2  29 1012.81 422.614   1
   1  -2  28 1235.54 401.919   1
  -1   2  28 1754.70 541.384   3
  -1   2  27 4953.36 816.477   3
   1  -2  27 4463.00 714.135   1
  -1   2  26 2272.82 568.966   3
   1  -2  26 2114.27 521.313   1
  -1   2  25 3097.07 644.399   3
   1  -2  25 2526.52 523.332   1
  -1   2  24 12764.9 1176.30   3
   1  -2  24 13540.8 1146.76   1
   1  -2  23 2537.26 532.866   1
  -1   2  23 2499.28 567.295   3
  -1   2  22 5775.06 780.516   3
   1  -2  22 4387.16 656.381   1
  -1   2  21 3758.31 636.584   3
   1  -2  21 3644.26 591.384   1
   1  -2  20 7908.83 784.813   1
  -1  -2 -20 7221.84 728.154   1
  -1   2  20 7795.84 838.657   3
   1  -2  19 3448.57 520.277   1
  -1   2  19 3492.92 580.057   3
  -1  -2 -19 3258.96 485.131   1
  -1   2  18 7799.53 801.406   3
  -1  -2 -18 7300.16 679.459   1
  -1  -2 -17 2864.43 420.686   1
  -1   2  17 2147.77 420.621   3
  -1   2  16 5293.21 664.213   3
  -1  -2 -16 3676.05 445.704   1
  -1   2  15 29838.3 1406.13   3
  -1  -2 -15 30901.6 1245.77   1
  -1  -2 -14 10269.9 703.796   1
  -1   2  14 11616.2 870.955   3
  -1  -2 -13 7736.08 587.726   1
  -1   2  13 7696.17 694.542   3
  -1  -2 -12 49374.8 1398.86   1
  -1   2  12 47436.1 1603.00   3
  -1  -2 -11 2512.75 314.777   1
  -1   2  11 3904.04 479.149   3
  -1   2  10 6899.73 570.700   3
  -1  -2 -10 5965.39 446.956   1
  -1   2   9 18756.9 896.700   3
  -1   2   8 226.048 145.151   3
  -1   2   7 2014.97 291.237   3
  -1   2   6 38882.8 1131.92   3
  -1   2   5 4131.41 367.607   3
  -1   2   4 2122.96 263.044   3
  -1  -2  -4 2457.00 281.528   3
  -1  -2  -3 50637.4 1119.61   2
  -1   2   3 48591.3 1193.16   3
   1   2  -3 47969.9 841.504   3
  -1  -2  -3 52603.5 1215.06   3
  -1  -2  -2-75.5886 92.6193   2
  -1   2   2-6.03396 111.695   3
   1   2  -2 11.8544 63.9985   3
  -1  -2  -2-9.02001 80.6356   3
  -1  -2  -1 283.095 112.267   2
   1  -2   1 394.730 117.862   3
  -1   2   1 346.807 128.713   3
   1   2  -1 241.384 85.3889   3
  -1  -2  -1 499.483 121.085   3
   1   2   0 151106. 1743.13   3
   1   2   0 154984. 1716.05   2
   1  -2   0 153226. 2065.98   3
  -1   2   0 154572. 2049.08   3
  -1  -2   0 156329. 1739.47   3
   1   2   1 711.249 135.246   2
   1  -2  -1 112.132 92.0527   3
  -1  -2   1 495.397 111.119   3
   1   2   1 519.759 130.071   3
   1   2   2 281.136 120.971   2
  -1  -2   2 225.671 93.2065   3
   1  -2  -2 383.976 147.180   3
   1   2   2 143.765 112.944   3
   1  -2  -3 45122.4 1133.52   3
  -1  -2   3 43742.6 836.832   3
   1   2   3 45859.4 1116.98   3
   1   2   4 2090.80 282.521   3
  -1  -2   4 1767.93 178.813   3
   1  -2  -4 2327.25 278.259   3
   1  -2  -5 4069.55 368.673   3
  -1  -2   5 4036.63 275.762   3
   1   2   5 4257.00 396.035   3
   1  -2  -6 41770.7 1188.27   3
   1   2   6 40192.7 1228.96   3
   1  -2  -7 1940.96 278.448   1
   1  -2  -7 2362.91 289.459   3
   1   2   7 2080.59 321.319   3
   1   2   8 629.287 200.334   3
   1  -2  -8 749.208 220.965   1
   1  -2  -8 702.675 172.050   3
   1  -2  -9 16253.4 836.262   3
   1  -2  -9 14068.2 814.789   1
   1   2   9 13865.7 814.312   3
   1  -2 -10 6193.53 579.731   1
   1  -2 -10 5772.95 524.460   3
   1   2  10 6991.74 615.305   3
   1  -2 -11 2908.79 404.581   3
   1  -2 -11 2971.41 412.171   1
   1   2  11 3582.84 512.899   3
   1  -2 -12 55003.0 1765.55   1
   1   2  12 55412.5 1777.00   3
   1  -2 -13 5689.34 634.303   1
   1   2  13 6707.54 690.684   3
   1  -2 -14 11425.5 885.607   1
   1   2  14 10511.3 832.266   3
   1  -2 -15 29048.0 1438.64   1
   1   2  15 30014.8 1435.80   3
   1   2  16 5669.41 674.489   3
   1  -2 -16 5176.03 661.621   1
   1   2  17 2309.82 483.586   3
   1  -2 -17 2552.68 512.352   1
  -1  -2  17 2247.92 500.400   1
  -1  -2  18 8546.17 913.856   1
   1  -2 -18 9140.06 910.990   1
   1   2  18 9789.10 930.933   3
  -1  -2  19 2557.99 532.446   1
   1  -2 -19 3912.25 627.664   1
   1   2  19 4272.81 648.419   3
   1  -2 -20 8433.70 917.095   1
   1   2  20 7063.67 804.289   3
  -1  -2  20 6794.59 847.682   1
   1   2  21 4196.54 674.877   3
  -1  -2  21 3441.81 662.050   1
   1   2  22 5394.22 796.319   3
  -1  -2  22 4562.11 701.842   1
  -1  -2  23 2389.52 557.738   1
   1   2  23 1377.78 438.851   3
   1   2  24 10690.4 1128.47   3
  -1  -2  24 8482.10 1029.51   1
  -1  -2  25 1872.56 555.319   1
   1   2  25 2405.53 592.165   3
   1   2  26 2588.04 653.146   3
  -1  -2  26 2214.92 570.491   1
  -1  -2  27 4619.21 794.663   1
   1   2  27 5010.36 856.575   3
  -1  -2  28 1475.59 516.812   1
   1   2  28 1134.39 482.131   3
   1   2  29 943.190 511.588   3
  -1  -2  29 489.544 327.260   3
  -1  -2  29 481.042 474.269   1
  -1  -2  30 4103.71 786.797   1
   1   2  30 5612.95 963.799   3
  -1  -2  30 4668.47 793.517   3
  -1  -2  31 2703.31 639.257   3
  -1  -2  31 4551.74 890.856   1
   1   2  31 3666.82 795.038   3
   1   2  32 769.451 397.412   3
  -1  -2  32 798.662 445.600   3
  -1  -2  32 306.031 325.517   1
  -1  -2  33 1706.92 546.057   3
  -1  -2  33 1521.92 661.723   1
   1   2  33 728.578 480.435   3
   1   2  34 153.171 441.842   3
  -1  -2  34 299.497 383.169   1
  -1   3  34 181.375 413.114   3
  -1   3  33 3301.04 792.152   3
  -1   3  32 1538.38 559.700   3
  -1   3  31 1919.64 622.936   3
   1  -3  31 2146.37 517.430   1
  -1   3  30 1653.30 553.731   3
   1  -3  30 2459.90 583.169   1
  -1   3  29 1928.31 578.388   3
   1  -3  29 2352.94 609.041   1
   1  -3  28 307.044 398.921   1
  -1   3  28-145.750 284.449   3
  -1   3  27 3771.86 754.210   3
   1  -3  27 4106.76 728.242   1
   1  -3  26-60.5846 277.501   1
  -1   3  26 231.747 283.677   3
  -1   3  25 6287.78 871.284   3
   1  -3  25 6041.23 808.310   1
  -1  -3 -24 3219.59 554.236   1
  -1   3  24 3659.33 689.040   3
   1  -3  24 3348.44 609.801   1
   1  -3  23 2057.35 496.630   1
  -1   3  23 2389.90 575.945   3
  -1  -3 -23 1135.53 369.045   1
  -1   3  22 589.142 320.856   3
  -1  -3 -22 1291.91 403.515   1
  -1   3  21 18034.0 1348.84   3
  -1  -3 -21 15852.4 1147.44   1
  -1  -3 -20 4212.74 587.623   1
  -1   3  20 3707.57 636.974   3
  -1  -3 -19 2769.35 468.616   1
  -1   3  19 2690.22 549.651   3
  -1   3  18 15524.1 1186.61   3
  -1  -3 -18 13792.0 992.315   1
  -1   3  17 2158.17 509.485   3
  -1  -3 -17 1815.08 385.706   1
  -1   3  16 1960.74 446.373   3
  -1  -3 -16 1678.48 330.034   1
  -1   3  15 8735.91 835.979   3
  -1  -3 -15 8532.20 715.440   1
  -1  -3 -14 61.1609 123.863   1
  -1   3  14 791.575 322.242   3
  -1   3  13 390.664 277.792   3
  -1  -3 -13 496.552 201.818   1
  -1   3  12 39506.4 1588.68   3
  -1   3  11 867.610 245.117   3
  -1   3  10 803.742 248.123   3
  -1   3   9 67408.8 1853.51   3
  -1   3   8 3080.18 395.818   3
  -1   3   7 6542.77 547.817   3
  -1  -3  -7 7001.12 600.087   3
  -1  -3  -6 31367.3 1183.96   3
  -1   3   6 30488.7 1150.12   3
  -1   3   5 1550.78 281.784   3
  -1  -3  -5 2250.44 316.767   3
  -1  -3  -4 960.410 201.376   2
  -1  -3  -4 1162.99 232.648   3
   1   3  -4 955.709 173.873   3
  -1   3   4 654.695 190.137   3
   1  -3   3 98228.6 2050.57   3
   1   3  -3 95737.9 1551.16   3
  -1  -3  -3 100434. 1709.83   2
  -1   3   3 101395. 1976.74   3
  -1  -3  -3 98911.4 1888.82   3
   1  -3   2 172.032 121.099   3
  -1   3   2 129.758 152.088   3
  -1  -3  -2 96.0672 96.8991   2
   1   3  -2 117.598 94.7629   3
  -1  -3  -2 263.261 143.081   3
  -1  -3  -1 319.635 136.468   3
  -1  -3  -1 180.411 95.1669   2
   1   3  -1 247.395 134.214   3
   1  -3   1 397.619 166.867   3
  -1   3   1 42.8696 168.007   3
   1   3  -1 568.834 147.436   2
   1   3   0 26480.9 891.843   3
  -1   3   0 26833.0 1012.46   3
  -1  -3   0 26373.2 890.735   3
   1  -3   0 25833.1 1027.49   3
   1   3   0 25544.9 770.360   2
   1  -3  -1 414.877 158.247   3
  -1  -3   1 637.172 183.547   3
   1   3   1 518.414 162.196   2
   1   3   1 425.773 152.932   3
  -1   3  -1 361.960 167.984   3
   1  -3  -2 230.128 130.926   3
   1   3   2 179.488 124.581   2
   1   3   2 216.656 120.856   3
  -1  -3   2 314.786 140.692   3
   1  -3  -3 91510.9 1916.44   3
  -1  -3   3 87819.2 1563.39   3
   1   3   3 87163.4 1799.26   3
  -1  -3   4 1090.78 202.339   3
   1   3   4 1120.05 248.561   3
   1  -3  -4 1353.60 235.550   3
  -1  -3   5 1636.07 236.874   3
   1   3   5 2057.20 335.278   3
   1  -3  -5 1783.86 278.503   3
  -1  -3   6 30751.7 952.827   3
   1   3   6 29774.9 1157.11   3
   1  -3  -6 32053.5 1199.05   3
  -1  -3   7 7212.55 489.032   3
   1   3   7 6908.92 599.403   3
   1  -3  -7 6465.66 558.177   3
   1  -3  -8 3427.16 423.176   3
   1   3   8 3596.84 468.953   3
   1  -3  -9 59537.4 1777.83   3
   1   3   9 58897.6 1817.04   3
   1   3  10 1320.67 387.231   3
   1  -3 -10 646.543 217.049   3
   1  -3 -10 806.372 210.448   1
   1  -3 -11 583.813 216.558   1
   1   3  11 871.690 344.021   3
   1  -3 -11 430.335 229.243   3
   1  -3 -12 42825.2 1609.66   1
   1   3  12 43506.6 1679.08   3
   1  -3 -12 42750.6 1625.40   3
   1  -3 -13 532.568 241.442   1
   1  -3 -13 279.982 181.175   3
   1   3  13 314.689 303.803   3
   1   3  14 453.496 334.023   3
   1  -3 -14 173.942 184.081   1
   1  -3 -14 212.609 191.491   3
   1  -3 -15 11018.3 908.379   1
   1   3  15 11619.4 958.666   3
   1   3  16 1384.44 376.323   3
   1  -3 -16 1850.45 418.603   1
   1  -3 -17 1167.11 322.281   1
   1   3  17 1546.79 371.854   3
   1   3  18 14738.2 1146.37   3
   1  -3 -18 14093.6 1108.61   1
   1   3  19 2491.69 567.073   3
   1   3  20 3238.88 636.497   3
   1   3  21 18165.3 1368.30   3
   1   3  22 1140.62 413.577   3
  -1  -3  22 803.161 430.260   1
  -1  -3  23 925.708 402.205   1
   1   3  23 1205.34 386.254   3
   1   3  24 4379.60 783.296   3
  -1  -3  24 4111.22 760.499   1
   1   3  25 6280.32 915.775   3
  -1  -3  25 6103.69 919.159   1
   1   3  26-202.476 393.941   3
  -1  -3  26-80.7678 376.378   1
   1   3  27 4275.98 791.780   3
  -1  -3  27 5490.93 892.757   1
  -1  -3  28 609.880 439.126   1
   1   3  28-272.813 490.927   3
  -1  -3  29 1234.00 425.549   1
   1   3  29 1458.86 522.747   3
   1   3  30 1923.92 579.931   3
  -1  -3  30 752.818 361.634   1
  -1  -3  31 1528.80 547.428   1
   1   3  31 783.625 429.317   3
   1   3  32 791.932 424.972   3
  -1  -3  32 522.359 464.444   1
  -1  -3  33 2884.91 694.149   1
   1   3  33 5515.75 1028.63   3
   1   3  34-40.8969 412.055   3
  -1  -3  34 387.643 419.146   1
  -1   4  33 2800.04 740.768   3
  -1   4  32 2045.56 632.245   3
  -1   4  31 917.882 495.592   3
   1  -4  31 891.768 460.102   1
  -1   4  30 2834.88 781.370   3
   1  -4  30 2160.51 587.376   1
  -1   4  29 1886.79 650.122   3
   1  -4  29 1458.05 525.454   1
   1  -4  28 3591.69 716.330   1
  -1   4  28 5118.60 919.979   3
   1  -4  27 1885.90 555.510   1
  -1   4  27 2247.36 669.069   3
   1  -4  26 3056.12 639.611   1
  -1   4  26 5394.04 878.018   3
  -1   4  25 1782.12 616.433   3
  -1   4  24 22452.0 1679.91   3
  -1   4  23 1727.99 572.818   3
  -1   4  22 823.101 462.751   3
  -1  -4 -22 764.569 353.726   1
  -1   4  21 9142.62 1030.32   3
  -1  -4 -21 7681.79 834.730   1
  -1   4  20 5469.66 792.103   3
  -1  -4 -20 6181.41 748.086   1
  -1  -4 -19 5415.29 694.350   1
  -1   4  19 7208.58 911.778   3
  -1  -4 -18 15133.7 1103.75   1
  -1   4  18 15346.1 1232.31   3
  -1   4  17 5496.42 738.629   3
  -1  -4 -17 5631.59 644.430   1
  -1   4  16 7847.14 857.848   3
  -1  -4 -16 7191.48 746.842   1
  -1   4  15 5314.57 691.669   3
  -1   4  14 2535.95 512.919   3
  -1   4  13 1722.82 423.542   3
  -1   4  12 78655.0 2369.82   3
  -1   4  11 3735.64 541.944   3
  -1   4  10 774.934 280.508   3
  -1  -4 -10 1015.95 318.329   3
  -1  -4  -9 24826.5 1268.19   3
  -1   4   9 24388.4 1222.21   3
  -1  -4  -8 859.548 255.601   3
  -1   4   8 933.227 279.061   3
  -1  -4  -7 268.623 143.428   3
  -1   4   7 493.035 200.261   3
  -1   4   6 304.589 189.894   3
  -1  -4  -6 285.662 215.815   3
  -1  -4  -5 3468.46 446.435   3
   1  -4   5 3492.39 454.744   3
  -1  -4  -5 2900.93 344.829   2
  -1   4   5 3186.23 441.395   3
   1   4  -4 74.2413 125.556   3
  -1   4   4 44.2149 145.571   3
  -1  -4  -4 180.803 113.464   2
   1  -4   4-17.3756 156.601   3
  -1  -4  -4 152.046 129.664   3
   1  -4   3 20816.6 1066.67   3
  -1   4   3 19320.3 1002.97   3
  -1  -4  -3 21083.7 834.258   2
   1   4  -3 19333.1 836.687   3
  -1  -4  -3 20247.7 990.320   3
  -1  -4  -2 227.149 131.214   2
  -1  -4  -2 111.654 142.066   3
  -1   4   2 16.4059 207.869   3
   1   4  -2-176.013 148.676   3
   1  -4   2 172.215 133.694   3
   1   4  -1 3184.84 306.289   2
  -1   4   1 3062.17 398.223   3
  -1  -4  -1 3593.13 343.669   2
  -1  -4  -1 3083.64 382.918   3
   1  -4   1 3010.61 396.187   3
   1   4  -1 3468.92 391.888   3
   1   4   0 158583. 2072.76   2
  -1  -4   0 161713. 2623.42   3
   1  -4   0 160868. 2889.59   3
  -1   4   0 150228. 2709.88   3
   1   4   0 163097. 2570.60   3
   1  -4  -1 3278.41 444.495   3
   1   4   1 3686.93 343.557   2
  -1  -4   1 2757.12 361.789   3
  -1   4  -1 3516.22 438.951   3
   1   4   1 3557.74 411.518   3
  -1  -4   2 117.630 113.458   3
   1  -4  -2 42.8737 125.577   3
   1   4   2-18.8521 123.448   3
  -1  -4   3 20487.2 915.521   3
   1   4   3 19377.1 953.902   3
   1  -4  -3 20474.4 1042.72   3
  -1  -4   4 397.547 180.589   3
   1   4   4 263.568 205.299   3
   1  -4  -4 395.831 127.332   3
   1   4   5 2712.71 396.821   3
   1  -4  -5 2916.70 397.826   3
  -1  -4   5 2887.26 348.612   3
   1   4   6 346.439 208.270   3
  -1  -4   6-81.3270 127.673   3
   1  -4  -6-4.05702 131.169   3
   1  -4  -7 299.354 200.678   3
   1   4   7 339.250 227.677   3
  -1  -4   7 283.722 167.987   3
   1   4   8 833.129 274.023   3
  -1  -4   8 489.924 174.505   3
   1  -4  -8 688.094 230.486   3
   1  -4  -9 22265.3 1190.63   3
  -1  -4   9 21187.8 1016.59   3
   1   4   9 21500.7 1195.14   3
   1   4  10 728.237 255.960   3
   1  -4 -10 851.671 289.304   3
   1  -4 -11 2922.66 445.626   3
   1   4  11 3236.42 527.198   3
   1   4  12 91479.4 2580.72   3
   1  -4 -12 82221.6 2461.32   3
   1   4  13 3177.01 631.550   3
   1  -4 -13 1839.12 420.914   3
   1  -4 -13 1938.90 393.796   1
   1  -4 -14 1759.80 406.749   1
   1   4  14 1772.47 437.857   3
   1  -4 -14 1688.48 362.415   3
   1  -4 -15 3564.30 557.433   1
   1   4  15 3279.90 572.102   3
   1  -4 -16 5474.86 698.413   1
   1   4  16 5403.71 719.236   3
   1   4  17 5636.54 764.073   3
   1   4  18 19156.4 1373.15   3
   1   4  19 5765.55 791.609   3
   1   4  20 6489.52 865.278   3
   1   4  21 8328.62 960.214   3
   1   4  22 547.708 319.184   3
   1   4  23 833.268 424.342   3
   1   4  24 17639.2 1481.29   3
   1   4  25 732.640 456.297   3
  -1  -4  25 569.277 442.781   1
   1   4  26 4691.40 786.145   3
  -1  -4  26 4276.94 883.546   1
  -1  -4  27 1471.59 492.607   1
   1   4  27 1663.44 629.836   3
   1   4  28 6128.34 983.943   3
  -1  -4  28 5015.91 949.824   1
   1   4  29 2314.07 678.960   3
  -1  -4  29 2271.94 666.073   1
  -1  -4  30 2016.74 601.774   1
   1   4  30 1697.33 614.002   3
  -1  -4  31 369.317 358.788   1
   1   4  31 402.776 317.712   3
   1   4  32 1974.91 683.399   3
  -1  -4  32 788.738 445.843   1
  -1  -4  33 1877.73 611.623   1
   1   4  33 2778.86 713.618   3
   1  -5  32-145.109 293.293   1
  -1   5  32 619.333 318.698   3
  -1   5  31 1576.91 581.583   3
   1  -5  31 887.596 450.691   1
  -1   5  30 708.754 504.617   3
   1  -5  30-250.943 362.489   1
  -1   5  29 5948.00 1005.27   3
   1  -5  29 3521.91 779.031   1
  -1   5  28 4857.71 900.070   3
  -1   5  27 3221.28 799.227   3
  -1   5  26 1019.60 511.850   3
  -1   5  25 2830.61 653.597   3
  -1   5  24 1800.77 641.208   3
  -1   5  23-237.245 320.251   3
  -1   5  22 3240.15 700.149   3
  -1   5  21 27297.6 1817.76   3
  -1   5  20 3262.83 697.888   3
  -1   5  19 1904.35 511.225   3
  -1  -5 -19 1324.23 407.669   1
  -1  -5 -18 14246.3 1145.27   1
  -1   5  18 16161.9 1336.66   3
  -1  -5 -17 4572.59 663.199   1
  -1   5  17 4317.01 705.799   3
  -1   5  16 6066.95 807.632   3
  -1   5  15 12890.6 1118.05   3
  -1   5  14 3673.23 596.966   3
  -1   5  13 5832.72 751.337   3
  -1   5  12 31478.5 1600.31   3
  -1   5  11 2921.80 502.585   3
  -1   5  10 208.353 255.081   3
  -1  -5 -10 541.577 245.203   3
  -1   5   9 76571.9 2368.15   3
  -1  -5  -9 73181.1 2314.31   3
  -1   5   8 3068.61 494.279   3
  -1  -5  -8 2803.41 488.288   3
   1  -5   8 2831.29 492.300   3
  -1  -5  -7 1164.67 335.910   3
   1  -5   7 1165.12 358.924   3
  -1   5   7 2037.67 394.640   3
  -1  -5  -7 2022.65 330.669   2
   1  -5   6 26766.1 1388.55   3
  -1  -5  -6 27690.5 1349.41   3
  -1   5   6 25726.5 1299.20   3
  -1  -5  -6 29101.3 1151.72   2
  -1  -5  -5 4396.74 548.880   3
  -1   5   5 5177.80 602.149   3
  -1  -5  -5 4705.34 462.881   2
   1  -5   5 4756.99 593.825   3
   1   5  -5 4825.51 495.659   3
   1   5  -4 1803.37 304.641   3
  -1  -5  -4 2381.80 412.526   3
   1  -5   4 2767.69 456.014   3
  -1   5   4 1849.40 394.120   3
  -1  -5  -4 2532.29 337.645   2
  -1  -5  -3 27461.2 1298.22   3
  -1  -5  -3 26481.5 1007.26   2
   1   5  -3 23837.1 1064.73   3
   1  -5   3 25404.8 1318.28   3
  -1   5   3 24287.7 1255.87   3
   1   5  -2 914.170 260.249   3
  -1   5   2 1289.16 354.170   3
  -1  -5  -2 711.630 263.806   3
   1   5  -2 514.768 132.089   2
  -1  -5  -2 709.646 176.533   2
   1  -5   2 645.412 230.587   3
   1  -5   1 833.532 265.730   3
   1   5  -1 822.191 236.925   3
  -1   5   1 601.102 207.256   3
   1   5  -1 1188.50 212.392   2
  -1  -5  -1 1072.99 298.418   3
   1   5   0 19581.0 1021.26   3
  -1  -5   0 21970.5 1109.51   3
  -1   5   0 18571.5 1057.38   3
   1  -5   0 22873.5 1218.31   3
   1   5   0 22187.1 852.430   2
   1   5   1 1480.94 253.861   2
   1  -5  -1 1030.01 114.987   2
  -1  -5   1 1417.90 298.380   3
  -1   5  -1 1430.76 337.064   3
   1  -5  -1 1383.20 328.920   3
   1   5   1 1461.53 323.525   3
   1  -5  -2 651.858 117.579   2
   1   5   2 1258.79 305.306   3
  -1   5  -2 595.365 241.914   3
   1  -5  -2 446.497 158.829   3
  -1  -5   2 531.661 245.189   3
   1  -5  -3 20411.3 1162.45   3
  -1  -5   3 21416.0 1068.06   3
   1   5   3 21242.7 1108.25   3
   1   5   4 2992.70 451.364   3
   1  -5  -4 2496.40 421.802   3
  -1  -5   4 2800.44 412.249   3
   1  -5  -5 5577.31 624.337   3
   1   5   5 4061.48 520.734   3
  -1  -5   5 4759.00 520.093   3
   1  -5  -6 24087.7 1295.09   3
   1   5   6 23738.3 1257.55   3
  -1  -5   6 26079.5 1168.56   3
  -1  -5   7 1398.43 317.635   3
   1  -5  -7 1987.54 410.795   3
   1   5   7 2116.43 410.113   3
  -1  -5   8 2945.73 434.754   3
   1  -5  -8 3984.91 561.072   3
   1   5   8 3301.82 514.591   3
  -1  -5   9 66764.4 1979.67   3
   1   5   9 62946.6 2153.72   3
   1  -5  -9 66368.4 2242.52   3
   1  -5 -10-34.5368 154.803   3
   1   5  10 301.183 339.199   3
  -1  -5  10 118.973 198.398   3
   1   5  11 3575.99 580.992   3
   1  -5 -11 3581.03 542.129   3
  -1  -5  11 3093.81 470.673   3
   1   5  12 29482.0 1580.25   3
  -1  -5  12 28799.0 1396.71   3
   1   5  13 5333.39 705.253   3
  -1  -5  13 5799.96 658.193   3
   1   5  14 3079.45 582.651   3
   1   5  15 16150.1 1257.03   3
   1   5  16 6550.93 840.012   3
   1   5  17 3006.33 606.565   3
   1   5  18 15247.4 1286.78   3
   1   5  19 942.198 455.102   3
   1   5  20 1581.48 493.191   3
   1   5  21 25319.9 1706.65   3
   1   5  22 3049.23 626.328   3
   1   5  23 427.995 281.804   3
   1   5  24 1572.04 522.937   3
   1   5  25 1574.72 505.499   3
   1   5  26 534.031 292.751   3
   1   5  27 2012.56 603.696   3
  -1  -5  28 4125.30 920.391   1
   1   5  28 5081.64 935.542   3
  -1  -5  29 2950.05 714.572   1
   1   5  29 4054.25 878.113   3
   1   5  30 162.425 435.286   3
  -1  -5  30-413.466 489.743   1
  -1  -5  31 730.629 512.849   1
   1   5  31 910.531 469.319   3
  -1  -5  32-332.761 412.231   1
   1   5  32 631.274 481.017   3
   1  -6  31 776.640 569.091   1
  -1   6  31-103.953 335.825   3
  -1   6  30-169.982 356.691   3
  -1   6  29 1563.94 615.223   3
  -1   6  28 1973.33 646.638   3
  -1   6  27 11488.9 1370.29   3
  -1   6  26 6497.21 996.809   3
  -1   6  25 352.329 590.431   3
  -1   6  24 10386.0 1229.68   3
  -1   6  23 4404.56 843.086   3
  -1   6  22-20.9091 272.447   3
  -1   6  21 6021.50 889.648   3
  -1   6  20 797.806 432.680   3
  -1   6  19 2951.77 677.191   3
  -1   6  18 19798.8 1523.61   3
  -1   6  17 6305.05 874.304   3
  -1   6  16 1718.37 576.485   3
  -1   6  15 19458.9 1445.24   3
  -1   6  14 2130.58 532.435   3
  -1   6  13 2566.99 509.591   3
  -1   6  12 20945.0 1401.55   3
   1  -6  11 235.059 201.310   3
  -1   6  11 185.119 230.768   3
   1  -6  10 1277.71 362.300   3
  -1   6  10 1419.44 371.589   3
  -1  -6  -9 6512.90 696.459   2
  -1   6   9 4978.38 668.609   3
   1  -6   9 5203.64 690.794   3
  -1  -6  -8 558.933 235.428   2
   1  -6   8 763.191 338.781   3
  -1   6   8 82.5709 199.325   3
   1  -6   7 1897.36 432.854   3
  -1  -6  -7 1825.60 315.346   2
  -1   6   7 1712.22 424.314   3
  -1  -6  -6 8249.31 824.067   3
   1  -6   6 7807.39 842.847   3
  -1  -6  -6 8597.68 652.460   2
  -1   6   6 8701.98 834.180   3
  -1  -6  -5 2986.48 387.992   2
  -1   6   5 2850.08 523.018   3
   1   6  -5 2223.22 383.848   3
   1  -6   5 2927.16 556.542   3
  -1  -6  -5 2002.45 412.630   3
   1  -6   4 1037.09 377.271   3
  -1  -6  -4 989.209 266.451   2
  -1   6   4 1098.14 288.712   3
   1   6  -4 355.233 203.454   3
  -1  -6  -4 1279.67 360.091   3
   1   6  -3 31289.8 1359.02   3
   1   6  -3 32737.4 1095.44   2
  -1  -6  -3 33234.0 1216.39   2
  -1  -6  -3 34636.5 1607.85   3
  -1   6   3 32063.4 1552.10   3
   1  -6   3 33672.9 1663.42   3
   1   6  -2 2616.07 437.396   3
  -1   6   2 2332.00 443.440   3
   1   6  -2 2331.03 304.985   2
   1  -6   2 2821.19 507.880   3
  -1  -6  -2 1724.42 408.880   3
   1  -6   1 6813.48 748.950   3
   1   6  -1 6446.07 494.541   2
  -1   6   1 6465.74 678.193   3
   1   6  -1 5632.97 607.349   3
  -1  -6  -1 6002.37 676.298   3
   1  -6   0 8557.19 833.136   3
   1   6   0 8259.57 743.983   3
   1   6   0 9115.20 603.646   2
  -1  -6   0 8948.24 788.188   3
  -1   6   0 7000.36 698.668   3
   1  -6  -1 6598.53 736.841   3
  -1  -6   1 5766.00 649.303   3
   1   6   1 6601.36 684.267   3
  -1   6  -1 6546.98 693.160   3
  -1  -6   2 1503.70 349.660   3
  -1   6  -2 1746.80 385.269   3
   1  -6  -2 2284.95 458.154   3
   1  -6  -2 2085.67 208.543   2
   1   6   2 1910.80 381.899   3
   1  -6  -3 29124.9 817.164   2
  -1  -6   3 30927.3 1438.85   3
   1  -6  -3 29237.7 1536.04   3
   1   6   3 29092.9 1438.27   3
  -1   6  -4 322.045 70.5417   2
   1   6   4 979.667 327.870   3
   1  -6  -4 616.981 258.948   3
   1  -6  -4 656.017 142.537   2
  -1  -6   4 815.745 262.190   3
   1   6   5 2832.10 466.763   3
   1  -6  -5 2501.20 471.765   3
  -1  -6   5 2643.21 456.133   3
  -1  -6   6 7514.28 729.988   3
   1  -6  -6 6841.87 776.618   3
   1   6   6 7070.89 755.928   3
   1   6   7 1767.72 398.155   3
  -1  -6   7 2271.89 431.071   3
  -1  -6   8 445.833 244.723   3
   1   6   8 553.799 302.313   3
  -1  -6   9 5558.64 646.974   3
   1   6   9 6286.52 748.156   3
  -1  -6  10 1033.43 292.191   3
   1   6  10 1070.72 359.629   3
  -1  -6  11 199.862 223.094   3
   1   6  11 237.726 219.197   3
   1   6  12 21735.8 1420.64   3
  -1  -6  12 22784.6 1361.41   3
   1   6  13 2251.59 555.654   3
  -1  -6  13 1991.12 442.042   3
  -1  -6  14 999.258 282.823   3
   1   6  14 1708.60 510.878   3
  -1  -6  15 22433.0 1418.12   3
   1   6  15 23380.7 1569.96   3
  -1  -6  16 1178.36 329.892   3
   1   6  16 1207.14 453.387   3
   1   6  17 8405.62 1015.81   3
  -1  -6  17 6378.36 754.252   3
   1   6  18 19932.0 1522.44   3
   1   6  19 3519.12 707.782   3
   1   6  20 318.245 297.088   3
   1   6  21 6818.55 1001.79   3
   1   6  22 639.371 389.544   3
   1   6  23 3770.84 748.158   3
   1   6  24 9113.66 1176.34   3
   1   6  25 470.498 300.706   3
   1   6  26 5996.53 980.841   3
   1   6  27 11915.9 1407.93   3
   1   6  28 3075.38 772.339   3
   1   6  29 278.894 345.937   3
  -1  -6  30 739.879 502.396   1
   1   6  30 414.036 433.918   3
   1   6  31 1184.46 601.677   3
  -1  -6  31 961.402 548.946   1
  -1   7  30 3447.28 911.053   3
  -1   7  29 620.569 577.787   3
  -1   7  28 874.076 578.813   3
  -1   7  27 1489.65 593.651   3
  -1   7  26 1549.42 557.768   3
  -1   7  25 693.733 476.781   3
  -1   7  24 7508.14 1113.47   3
  -1   7  23 2814.28 731.121   3
  -1   7  22 4277.33 836.651   3
  -1   7  21 1329.41 542.243   3
  -1   7  20 745.875 391.764   3
  -1   7  19-123.882 270.525   3
  -1   7  18 10427.7 1166.73   3
  -1   7  17 2674.84 675.515   3
  -1   7  16 879.496 482.126   3
  -1   7  15 8895.94 1064.12   3
  -1   7  14 3183.08 700.871   3
  -1   7  13 1416.06 464.075   3
  -1   7  12 12664.1 1162.95   3
  -1  -7 -11 8104.54 852.297   2
  -1   7  11 7281.39 899.744   3
  -1  -7 -10 5214.47 650.854   2
  -1   7  10 5009.87 772.656   3
  -1  -7  -9 2652.31 457.251   2
  -1   7   9 3395.76 631.950   3
  -1  -7  -8 362.502 200.140   2
  -1   7   8 238.540 273.830   3
  -1  -7  -7 1273.21 275.408   2
  -1   7   7 1588.16 421.527   3
  -1   7   6 24885.0 1486.44   3
  -1  -7  -6 25084.1 1160.88   2
  -1  -7  -5 5120.02 533.800   2
   1   7  -5 4970.10 603.298   3
   1   7  -5 5356.38 502.535   2
  -1   7   5 5668.57 750.185   3
  -1   7   4 106.815 212.139   3
   1   7  -4 405.553 252.795   3
  -1  -7  -4-41.1162 138.674   2
   1   7  -4 82.8770 118.367   2
   1   7  -3 38749.2 1668.19   3
  -1   7   3 41766.9 1905.48   3
   1   7  -3 43708.2 1317.66   2
   1   7  -2 47.6748 119.837   2
  -1  -7  -2 102.814 235.384   3
  -1   7   2 8.95135 199.313   3
   1   7  -2-118.016 197.808   3
  -1  -7  -1 4149.04 628.225   3
  -1   7   1 3942.26 602.270   3
   1   7  -1 4474.33 447.284   2
   1   7  -1 4810.27 622.201   3
  -1   7   0 5037.37 669.223   3
  -1  -7   0 5439.30 703.237   3
   1   7   0 5176.63 660.427   3
  -1   7  -1 3112.92 521.747   3
   1   7   1 4393.41 618.920   3
  -1  -7   1 4357.20 627.096   3
   1   7   2-245.908 247.829   3
  -1  -7   2 127.912 148.055   3
  -1   7  -2-3.72386 212.294   3
  -1  -7   3 41352.7 1820.88   3
   1  -7  -3 44918.3 1073.56   2
   1   7   3 44218.0 1905.54   3
   1   7   4 70.5924 211.357   3
   1  -7  -4 428.399 145.027   2
  -1  -7   4 161.207 211.675   3
   1   7   5 5820.79 740.418   3
  -1   7  -5 4808.15 271.142   2
  -1  -7   5 6382.27 736.877   3
   1  -7  -5 6584.67 481.155   2
   1   7   6 26283.7 1533.69   3
   1  -7  -6 26245.1 1006.05   2
  -1  -7   6 29345.0 1535.81   3
   1   7   7 2019.18 481.509   3
  -1  -7   7 1406.89 386.231   3
   1   7   8 258.135 238.984   3
  -1  -7   8 202.331 230.005   3
   1   7   9 2953.09 566.237   3
  -1  -7   9 2383.88 496.815   3
  -1  -7  10 5338.33 712.883   3
   1   7  10 4284.40 683.392   3
   1   7  11 7153.53 863.578   3
  -1  -7  11 7298.13 838.046   3
  -1  -7  12 11080.9 1044.12   3
   1   7  12 12319.5 1141.89   3
   1   7  13 2394.55 539.086   3
  -1  -7  13 2242.03 513.580   3
   1   7  14 2451.66 574.869   3
  -1  -7  14 3154.29 629.976   3
   1   7  15 9603.18 1072.36   3
  -1  -7  15 10365.2 1087.44   3
  -1  -7  16 123.281 277.938   3
   1   7  16 665.128 421.615   3
   1   7  17 1612.42 480.739   3
  -1  -7  17 1098.37 411.055   3
   1   7  18 10608.6 1172.03   3
  -1  -7  18 8632.34 985.362   3
   1   7  19-6.71491 277.897   3
   1   7  20 56.8652 337.815   3
   1   7  21 1406.20 461.039   3
   1   7  22 2815.59 674.555   3
   1   7  23 1690.06 573.007   3
   1   7  24 8008.33 1108.79   3
   1   7  25-147.919 446.700   3
   1   7  26 1830.20 598.270   3
   1   7  27 2026.66 670.611   3
   1   7  28 679.933 453.342   3
   1   7  29 109.965 314.207   3
   1   7  30 2219.82 707.745   3
  -1   8  28-16.7977 492.847   3
  -1   8  27 9810.20 1385.78   3
  -1   8  26 4602.44 991.211   3
  -1   8  25 765.214 408.175   3
  -1   8  24 6567.65 1044.20   3
  -1   8  23 1508.40 475.571   3
  -1   8  22 426.603 444.615   3
  -1   8  21 1991.60 731.435   3
  -1   8  20-73.4227 307.795   3
  -1   8  19 169.564 526.794   3
  -1   8  18 13245.1 1364.51   3
  -1   8  17 208.853 344.910   3
  -1   8  16 258.034 379.173   3
  -1   8  15 14821.9 1391.78   3
  -1   8  14 6226.77 936.738   3
  -1   8  13 2780.96 650.507   3
  -1   8  12 2757.20 670.508   3
  -1  -8 -11 2040.86 446.917   2
  -1   8  11 1798.40 559.965   3
  -1   8  10 2992.60 638.062   3
  -1  -8 -10 2643.90 499.943   2
  -1  -8  -9 7871.61 754.848   2
  -1   8   9 7722.42 944.766   3
  -1  -8  -8-113.762 164.032   2
  -1   8   8-66.4636 234.423   3
  -1  -8  -7 2749.42 446.113   2
  -1   8   7 2333.02 551.422   3
  -1   8   6 11291.4 1112.53   3
  -1  -8  -6 9808.40 780.431   2
   1   8  -6 9398.30 690.551   2
   1   8  -5-141.174 156.419   2
  -1  -8  -5 91.3893 133.144   2
   1   8  -5-20.8682 273.043   3
  -1   8   5-259.562 326.962   3
   1   8  -4 258.339 149.824   2
  -1   8   4-63.6896 264.223   3
   1   8  -4 528.626 238.765   3
   1   8  -3 27572.5 1121.99   2
   1   8  -3 26040.5 1475.62   3
  -1   8   3 26376.1 1635.07   3
  -1   8   2 5441.83 736.893   3
   1   8  -2 5851.26 532.725   2
   1   8  -2 5506.79 729.905   3
  -1   8   1 3181.67 596.680   3
   1   8  -1 3725.80 599.316   3
   1   8   0 1714.01 459.943   3
  -1   8   0 1286.78 398.167   3
  -1   8  -1 2797.55 557.959   3
   1   8   1 4308.04 635.393   3
   1   8   2 4151.42 671.643   3
  -1   8  -2 4169.62 680.178   3
   1   8   3 25823.2 1588.47   3
   1  -8  -4 406.610 160.061   2
   1   8   4 109.559 240.910   3
   1   8   5 515.711 304.806   3
   1  -8  -5 176.633 105.145   2
   1   8   6 11457.0 1082.33   3
   1  -8  -6 10601.4 667.184   2
  -1   8  -7 1752.21 201.074   2
   1  -8  -7 2310.26 335.986   2
   1  -8  -8 161.968 171.437   2
   1   8   8 133.030 218.923   3
   1   8   9 9033.97 1006.95   3
   1   8  10 2140.00 493.769   3
   1   8  11 799.232 389.698   3
   1   8  12 2164.96 545.548   3
   1   8  13 2236.47 541.529   3
   1   8  14 6414.76 948.267   3
   1   8  15 15549.0 1409.56   3
   1   8  16 60.9365 357.528   3
   1   8  17 581.513 401.720   3
   1   8  18 12628.3 1376.15   3
   1   8  19 462.130 400.817   3
   1   8  20-327.760 408.813   3
   1   8  21 2225.61 600.912   3
   1   8  22 807.516 503.180   3
   1   8  23 3176.95 771.555   3
   1   8  24 4849.38 944.895   3
   1   8  25 1118.99 620.763   3
   1   8  26 7477.92 1142.76   3
   1   8  27 9405.04 1327.23   3
   1   8  28 643.047 334.832   3
  -1   9  26 376.443 612.086   3
  -1   9  25 139.972 337.338   3
  -1   9  24 755.429 386.964   3
  -1   9  23 1363.26 613.216   3
  -1   9  22 285.356 377.480   3
  -1   9  21 5747.12 1010.57   3
  -1   9  20 1829.55 557.426   3
  -1   9  19 2153.32 661.619   3
  -1   9  18 13077.6 1439.77   3
  -1   9  17 1608.28 538.698   3
  -1   9  16 176.391 421.602   3
  -1   9  15 6344.50 1044.98   3
  -1   9  14 1474.77 582.264   3
  -1   9  13 2072.92 614.375   3
  -1   9  12 50.0638 312.930   3
  -1   9  11 8281.17 1074.49   3
  -1   9  10 1061.33 488.766   3
  -1  -9 -10 1313.26 359.599   2
  -1   9   9 5430.60 832.545   3
  -1  -9  -9 4425.46 601.943   2
   1   9  -8 2737.67 426.866   2
  -1   9   8 3180.79 672.351   3
  -1  -9  -8 2917.73 494.578   2
   1   9  -7 3215.30 444.259   2
  -1  -9  -7 4288.29 587.385   2
  -1   9   7 4442.93 769.890   3
  -1   9   6 40955.9 2213.06   3
  -1  -9  -6 39135.5 1666.51   2
   1   9  -6 40535.3 1441.27   2
  -1   9   5 1137.38 422.227   3
   1   9  -5 617.006 180.748   2
   1   9  -4 782.338 333.343   3
  -1   9   4 852.261 337.954   3
   1   9  -4 494.251 154.918   2
   1   9  -3 13043.5 1148.79   3
   1   9  -3 13663.6 841.430   2
  -1   9   3 13014.3 1240.70   3
   1   9  -2 1355.49 362.427   3
  -1   9   2 1559.69 488.327   3
   1   9  -1 1556.17 433.233   3
  -1   9   1 1485.28 427.232   3
  -1   9   0 3857.53 691.633   3
   1   9   0 3071.57 623.692   3
   1   9   1 2338.94 556.843   3
  -1   9  -1 1394.67 449.726   3
   1   9   2 533.511 313.173   3
   1   9   3 16348.8 1354.52   3
   1   9   4 965.871 408.590   3
   1  -9  -5 1765.61 293.945   2
   1   9   5 1875.10 630.499   3
   1   9   6 40620.8 2175.41   3
   1  -9  -6 41608.5 1406.67   2
   1  -9  -7 4415.25 499.532   2
   1   9   7 5375.95 822.581   3
  -1   9  -8 2057.54 217.902   2
   1  -9  -8 3689.77 483.254   2
   1   9   8 3425.20 716.713   3
   1   9   9 6835.94 909.333   3
   1  -9  -9 6843.30 672.264   2
  -1   9  -9 5567.02 398.959   2
   1  -9 -10 1302.88 320.732   2
   1   9  10 1320.09 519.256   3
   1   9  11 9425.87 1116.84   3
   1  -9 -11 8732.68 813.718   2
   1   9  12-157.067 298.034   3
   1   9  13 2185.76 617.698   3
   1   9  14 2882.83 703.223   3
   1   9  15 5713.02 954.513   3
   1   9  16-443.616 377.458   3
   1   9  17 806.984 424.443   3
   1   9  18 12385.1 1376.68   3
   1   9  19 3319.74 796.076   3
   1   9  20 2564.65 663.875   3
   1   9  21 6485.07 1019.90   3
   1   9  22 1356.69 549.469   3
   1   9  23 1015.92 568.179   3
   1   9  24 600.555 488.903   3
   1   9  25 1491.09 607.573   3
   1   9  26 0.95854 357.428   3
  -1  10  24 564.483 378.981   3
  -1  10  23 914.758 482.349   3
  -1  10  22 595.794 502.477   3
  -1  10  21 4331.44 964.167   3
  -1  10  20 318.328 407.514   3
  -1  10  19 1173.87 553.381   3
  -1  10  18 9896.43 1369.15   3
  -1  10  17 173.409 308.581   3
  -1  10  16 1027.94 526.596   3
  -1  10  15 1633.42 628.883   3
  -1  10  14-74.7652 334.985   3
  -1  10  13 2420.83 742.357   3
  -1  10  12 17416.1 1609.54   3
  -1  10  11 3541.84 795.632   3
  -1  10  10 2529.26 622.328   3
   1  10 -10 1566.57 365.263   2
   1  10  -9 6397.62 624.411   2
  -1  10   9 6723.64 985.242   3
  -1  10   8 873.570 490.518   3
   1  10  -8 151.040 185.742   2
   1  10  -7 1356.84 305.740   2
  -1  10   7 2716.93 704.118   3
  -1  10   6 18.6986 327.709   3
   1  10  -6 361.614 218.738   2
   1  10  -5 1618.12 336.996   2
  -1  10   5 2126.64 607.065   3
  -1  10   4 4389.40 821.143   3
   1  10  -4 3896.75 722.957   3
  -1  10   3 11347.9 1239.56   3
   1  10  -3 12606.3 1223.85   3
  -1  10   2 3517.80 715.164   3
   1  10  -2 4361.97 744.119   3
   1  10  -1 2305.32 549.172   3
  -1  10   1 2210.39 567.310   3
  -1  10   0 18092.5 1471.94   3
   1  10   0 16048.6 1391.97   3
  -1  10  -1 1927.60 445.641   3
   1  10   1 1793.65 519.998   3
   1  10   2 3601.59 678.175   3
   1  10   3 13491.5 1307.73   3
   1  10   4 3565.15 699.286   3
   1  10   5 1676.75 524.278   3
   1  10   6 2199.54 619.055   3
   1  10   7 1247.08 462.362   3
   1  10   8 376.646 331.317   3
   1  10   9 10407.8 1205.82   3
   1  10  10 2996.79 726.259   3
   1  10  11 3056.25 729.572   3
   1  10  12 15888.7 1558.15   3
   1  10  13 1321.61 552.877   3
   1  10  14 281.947 273.462   3
   1  10  15 2282.85 663.810   3
   1  10  16 1326.54 504.380   3
   1  10  17-307.070 487.851   3
   1  10  18 7975.79 1157.97   3
   1  10  19 1310.84 642.511   3
   1  10  20 461.033 496.064   3
   1  10  21 3686.18 847.469   3
   1  10  22 1237.33 598.539   3
   1  10  23 2395.76 765.603   3
   1  10  24 2375.82 784.668   3
  -1  11  21 3255.01 833.127   3
  -1  11  20 1278.09 555.632   3
  -1  11  19 1106.31 571.537   3
  -1  11  18 198.177 434.784   3
  -1  11  17 4008.83 862.473   3
  -1  11  16 1557.62 658.733   3
  -1  11  15 4524.21 949.914   3
  -1  11  14 889.712 411.982   3
  -1  11  13 723.457 434.805   3
  -1  11  12 666.286 349.594   3
  -1  11  11 3804.45 846.199   3
  -1  11  10 1081.54 658.845   3
  -1  11   9 7119.94 1079.71   3
  -1  11   8 2300.06 646.518   3
  -1  11   7 627.042 393.634   3
  -1  11   6 2004.18 684.167   3
  -1  11   5 487.534 351.419   3
  -1  11   4 3653.70 772.516   3
  -1  11   3 9768.48 1202.75   3
   1  11  -3 11849.1 1242.62   3
   1  11  -2 236.389 420.410   3
  -1  11   2 347.044 409.657   3
  -1  11   1 737.437 477.898   3
   1  11  -1 969.850 435.602   3
   1  11   0 12610.5 1289.61   3
  -1  11   0 12457.8 1345.94   3
   1  11   1 303.140 290.149   3
   1  11   2 216.328 382.153   3
   1  11   3 12875.6 1343.02   3
   1  11   4 6453.28 978.320   3
   1  11   5 869.955 426.679   3
   1  11   6 1638.64 534.995   3
   1  11   7 414.951 385.077   3
   1  11   8 3422.93 792.589   3
   1  11   9 8846.09 1141.66   3
   1  11  10 1003.48 540.299   3
   1  11  11 3920.29 859.877   3
   1  11  12 707.932 387.464   3
   1  11  13 641.535 646.931   3
   1  11  14 341.441 482.787   3
   1  11  15 3000.94 762.525   3
   1  11  16 14.1294 325.108   3
   1  11  17 4639.09 990.877   3
   1  11  18 941.571 556.147   3
   1  11  19 2018.32 684.771   3
   1  11  20 2000.97 662.635   3
   1  11  21 5304.19 1048.68   3
  -1  12  17 3955.96 898.625   3
  -1  12  16 301.567 501.197   3
  -1  12  15 3585.48 952.294   3
  -1  12  14 965.945 515.587   3
  -1  12  13 1643.95 629.012   3
  -1  12  12 7218.99 1126.17   3
  -1  12  11 1725.58 668.928   3
  -1  12  10 1513.76 578.712   3
  -1  12   9 4193.27 872.688   3
  -1  12   8 283.248 386.246   3
  -1  12   7 1617.86 660.965   3
  -1  12   6 191.484 371.469   3
  -1  12   5 2072.01 673.784   3
  -1  12   4 1786.87 624.347   3
  -1  12   3 761.582 456.090   3
  -1  12   2 2571.30 763.539   3
   1  12  -2 2158.12 601.927   3
   1  12  -1 775.044 403.319   3
  -1  12   1 1905.16 630.187   3
   1  12   0 7385.72 1073.45   3
   1  12   1 1465.43 566.643   3
   1  12   2 3004.97 694.027   3
   1  12   3 1414.71 533.567   3
   1  12   4 2098.98 631.143   3
   1  12   5 2310.90 684.131   3
   1  12   6 372.381 406.060   3
   1  12   7 1566.54 588.480   3
   1  12   8 1108.91 557.474   3
   1  12   9 4182.27 908.824   3
   1  12  10 1297.85 550.458   3
   1  12  11 258.387 350.438   3
   1  12  12 5782.17 1083.82   3
   1  12  13 2182.95 747.634   3
   1  12  14 509.457 471.010   3
   1  12  15 2926.86 787.025   3
   1  12  16 28.9390 421.733   3
   1  12  17 2543.55 798.404   3
  -1  13  12 2473.29 793.040   3
  -1  13  11 1442.31 667.006   3
  -1  13  10-344.417 313.554   3
  -1  13   9 3966.32 871.617   3
  -1  13   8 2071.43 727.927   3
  -1  13   7 1511.43 622.506   3
  -1  13   6 543.200 325.024   3
  -1  13   5 2247.70 701.776   3
  -1  13   4 2966.59 812.901   3
  -1  13   3 3374.29 838.453   3
  -1  13   2 124.818 335.818   3
   1  13  -1 449.844 411.619   3
   1  13   0 2833.10 770.878   3
   1  13   1 196.958 371.418   3
   1  13   2 747.549 453.852   3
   1  13   3 4134.29 838.005   3
   1  13   4 2684.75 708.818   3
   1  13   5 470.425 509.628   3
   1  13   6 1023.37 554.796   3
   1  13   7 1442.10 622.006   3
   1  13   8 3440.76 834.916   3
   1  13   9 4823.93 1028.23   3
   1  13  10 141.839 462.584   3
   1  13  11 718.077 509.320   3
   1  13  12 1240.55 566.893   3
  -2   0   0 3651.15 270.414   1
   2   0   0 3728.85 273.613   1
   2   0   1 560.148 116.005   1
   2   0  -1 496.568 124.621   1
  -2   0  -1 476.190 108.432   1
  -2   0   1 608.033 126.598   1
  -2   0  -1 607.517 131.050   2
   2   0   1 598.753 141.339   2
   2   0   2 1053.86 177.280   2
  -2   0  -2 1061.03 126.657   1
   2   0   2 998.201 120.503   1
  -2   0   2 1260.16 206.687   1
  -2   0  -2 809.922 145.008   2
   2   0  -2 1072.35 196.254   1
  -2   0  -3 2547.69 282.707   2
   2   0   3 2547.42 282.989   2
  -2   0   3 2375.12 281.274   1
   2   0  -3 2285.94 258.584   1
   2   0  -3 2248.68 173.036   3
   2   0  -4 3537.68 205.604   3
  -2   0  -4 3640.50 339.215   2
  -2   0   4 3784.86 370.810   1
   2   0  -4 3200.98 327.062   1
  -2   0   5 11935.3 399.482   3
   2   0  -5 11767.3 646.939   1
   2   0  -5 11597.9 383.260   3
  -2   0   5 12526.5 673.390   1
   2   0  -6 7206.97 543.740   1
  -2   0   6 6924.49 538.539   1
   2   0  -6 7383.66 341.757   3
  -2   0   6 7427.09 337.942   3
  -2   0   7 762.512 133.224   3
   2   0  -7 603.681 114.660   3
   2   0  -7 921.874 224.675   1
  -2   0   7 986.620 257.057   1
  -2   0   8 2595.51 425.822   1
  -2   0   8 1427.94 180.128   3
   2   0  -8 1877.54 350.855   1
  -2   0   9 107273. 2257.32   1
  -2   0   9 99823.3 1486.67   3
   2   0  10 1468.18 173.294   1
  -2   0  10 899.704 183.675   3
  -2   0  10 1978.56 451.303   1
   2   0  11 1002.37 161.387   1
  -2   0  11 436.735 173.672   3
  -2   0  11 1158.98 396.377   1
   2   0  12 113312. 1489.66   1
  -2   0  12 116310. 2584.98   1
  -2   0  12 119031. 2033.81   3
   2   0  13 3023.80 304.427   1
  -2   0  13 2140.26 490.327   1
  -2   0  13 2171.22 352.059   3
  -2   0  14 4168.38 434.306   3
  -2   0  14 3628.26 510.542   1
   2   0  14 4035.82 334.009   1
  -2   0  15 15621.2 866.793   3
   2   0  15 14892.0 656.385   1
  -2   0  15 13895.6 998.555   1
  -2   0  16 4262.98 577.463   1
  -2   0  16 4375.63 496.878   3
   2   0  16 3592.17 348.280   1
  -2   0  17 555.732 225.375   1
  -2   0  17 1370.85 321.917   3
   2   0  17 1447.04 263.824   1
  -2   0  18-202.373 273.249   1
   2   0  18 190.629 158.279   1
  -2   0  18 92.7185 178.704   3
  -2   0  19 3192.54 572.031   1
   2   0  19 4022.23 423.326   1
  -2   0  19 4476.31 556.374   3
   2   0  20 919.539 255.238   1
  -2   0  20 1495.34 462.345   1
  -2   0  20 1089.17 328.235   3
  -2   0  21 37206.1 1894.68   1
   2   0  21 35337.2 1304.72   1
  -2   0  21 37793.9 1672.22   3
  -2   0  22 420.451 304.973   1
  -2   0  22 869.142 338.663   3
   2   0  22 653.532 251.773   1
   2   0  23 1230.56 326.013   1
  -2   0  23 1737.39 432.308   3
  -2   0  23 872.525 371.689   1
   2   0  24 4713.75 535.760   1
  -2   0  24 6250.28 768.260   3
  -2   0  24 5806.12 851.305   1
  -2   0  25 3466.68 590.724   3
  -2   0  25 4013.76 692.593   1
  -2   0  26 969.088 425.983   3
  -2   0  26 356.134 371.859   1
  -2   0  27 790.826 441.514   1
  -2   0  27 669.875 385.905   3
  -2   0  28 10472.8 1178.86   1
  -2   0  28 8672.27 989.147   3
  -2   0  29 8463.73 996.866   3
  -2   0  29 9641.53 1155.28   1
  -2   0  30 3726.10 768.048   1
  -2   0  30 3543.72 686.598   3
  -2   0  31-255.929 321.517   3
  -2   0  31 561.433 378.087   1
  -2   0  32 1553.77 513.095   3
   2   0  32 1832.73 680.466   3
  -2   0  32 1248.56 489.900   1
   2   0  33 4630.85 958.408   3
  -2   0  33 3215.52 668.608   3
  -2   0  33 4452.90 899.701   1
  -2   0  34 1345.64 616.188   1
   2   0  34-386.789 454.690   3
  -2   1  34 599.791 371.888   3
  -2   1  33 1785.81 532.984   3
  -2   1  32 742.661 402.818   3
  -2   1  31 839.965 425.703   3
  -2   1  30 2803.12 607.992   3
   2  -1  30 793.553 407.660   1
  -2   1  29 1045.77 453.979   1
   2  -1  29 1102.26 406.728   1
  -2   1  29 1068.91 447.307   3
  -2   1  28 1199.11 561.408   1
   2  -1  28 1063.49 356.187   1
  -2   1  28 1103.25 476.049   3
  -2   1  27 5372.27 858.406   1
   2  -1  27 5314.37 677.186   1
  -2   1  27 6608.57 880.804   3
  -2   1  26 944.780 431.144   3
   2  -1  26 1003.04 326.794   1
  -2   1  26 750.585 380.477   1
  -2   1  25 3849.00 703.047   3
   2  -1  25 3168.54 499.546   1
  -2   1  25 4164.66 736.415   1
  -2   1  24 24245.5 1640.08   1
   2  -1  24 21997.4 1229.59   1
  -2   1  24 23953.8 1518.50   3
  -2   1  23 5622.30 799.339   1
   2  -1  23 7112.53 689.111   1
  -2   1  23 7705.67 853.782   3
  -2   1  22 1757.64 453.171   3
   2  -1  22 1526.05 353.964   1
  -2   1  22 2035.79 488.689   1
  -2   1  21 658.033 400.125   1
  -2   1  21 541.732 333.131   3
   2  -1  21 692.451 245.737   1
   2  -1  20 6970.90 599.676   1
  -2   1  20 6509.24 782.961   1
  -2   1  20 8374.81 823.005   3
  -2   1  19 4739.22 673.081   1
   2  -1  19 5118.88 521.581   1
  -2   1  19 6380.06 708.177   3
  -2   1  18 3813.22 525.745   3
   2  -1  18 3547.99 437.765   1
  -2   1  18 3445.16 571.961   1
  -2   1  17 2253.56 425.035   3
   2  -1  17 2385.46 353.177   1
  -2   1  17 1903.08 420.120   1
   2  -1  16 4630.97 440.149   1
  -2   1  16 4683.54 537.734   3
  -2   1  16 4930.03 629.058   1
   2  -1  15 10531.1 613.007   1
  -2   1  15 9626.64 824.437   1
  -2   1  15 9547.64 738.916   3
  -2   1  14 1542.83 334.658   1
  -2   1  14 1696.96 322.635   3
   2  -1  14 1433.89 217.808   1
  -2   1  13 3147.36 426.388   3
  -2   1  13 4360.05 599.546   1
  -2  -1 -12 94546.1 1375.38   1
  -2   1  12 100525. 2368.31   1
  -2   1  12 98447.0 2016.34   3
  -2   1  11 2186.25 309.965   3
  -2  -1 -11 1787.99 186.215   1
  -2   1  11 2285.10 436.350   1
  -2  -1 -10 3694.45 247.344   1
  -2   1  10 4102.98 384.146   3
  -2   1  10 4623.77 519.273   1
  -2  -1  -9 25279.9 621.200   1
  -2   1   9 28033.5 934.979   3
  -2   1   9 28623.5 1180.28   1
  -2   1   8 6416.01 442.826   3
  -2   1   8 6500.48 571.608   1
  -2   1   7 2940.87 298.282   3
  -2   1   7 3438.88 434.305   1
  -2   1   6 164266. 2053.19   3
  -2   1   6 163923. 2545.28   1
  -2   1   5 1186.65 277.504   1
  -2   1   5 1037.12 176.550   3
  -2  -1  -5 1212.30 235.690   2
  -2   1   4 1655.06 260.979   1
  -2  -1  -4 1575.23 273.347   2
  -2   1   4 1112.64 172.870   3
  -2   1   3 148435. 1855.14   3
  -2   1   3 148248. 2146.14   1
  -2  -1  -2 569.840 152.299   2
   2  -1   2 775.961 149.078   2
  -2  -1  -1 286.549 111.191   2
   2  -1   1 148.903 69.5999   2
   2   1   0 86127.3 1527.67   2
   2   1   1 646.311 167.064   2
   2  -1  -1 228.445 124.706   1
   2   1   2 613.302 167.121   2
   2  -1  -2 855.311 159.018   3
   2  -1  -2 844.086 192.091   1
  -2   1  -2 548.733 116.280   2
   2   1   3 157678. 2188.26   2
   2  -1  -3 159891. 1892.60   3
   2  -1  -3 163279. 2250.19   1
  -2   1  -3 161468. 1929.52   2
   2  -1  -4 1042.69 201.103   1
  -2   1  -4 1756.72 230.010   2
   2  -1  -4 1344.93 186.085   3
   2  -1  -5 1090.13 218.732   1
   2  -1  -5 1117.16 177.721   3
   2  -1  -6 167684. 2045.74   3
   2  -1  -6 171755. 2640.61   1
   2  -1  -7 3102.81 299.735   3
   2  -1  -7 2861.33 372.986   1
  -2  -1   8 3890.19 228.432   3
   2  -1  -8 5664.22 545.505   1
   2  -1  -8 5420.43 407.884   3
  -2  -1   9 23361.7 616.760   3
   2  -1  -9 26107.0 1163.11   1
  -2  -1   9 25662.6 1191.80   1
   2  -1  -9 25063.6 892.172   3
  -2  -1  10 4933.68 327.918   3
   2  -1 -10 4328.97 507.776   1
  -2  -1  10 4657.85 544.446   1
   2  -1 -10 4380.66 403.754   3
   2  -1 -11 1775.65 350.126   1
  -2  -1  11 2021.63 433.087   1
   2  -1 -11 2401.65 313.746   3
  -2  -1  11 2440.35 270.274   3
  -2  -1  12 94911.5 1614.22   3
   2  -1 -12 91280.0 2445.09   1
  -2  -1  12 92281.0 2443.95   1
  -2  -1  13 2598.55 331.396   3
  -2  -1  13 1891.93 427.377   1
   2  -1 -13 1777.41 399.019   1
   2  -1 -14 1759.46 400.180   1
  -2  -1  14 2112.07 308.618   3
  -2  -1  14 2436.44 496.748   1
  -2  -1  15 8005.92 569.975   3
  -2  -1  15 7835.34 815.377   1
   2  -1 -15 8124.78 813.553   1
   2  -1 -16 3852.59 593.265   1
  -2  -1  16 3888.70 430.539   3
  -2  -1  16 2877.17 537.500   1
  -2  -1  17 1992.65 331.464   3
   2  -1 -17 2127.85 510.897   1
  -2  -1  17 1971.36 468.514   1
  -2  -1  18 4140.85 641.220   1
  -2  -1  18 5013.90 527.596   3
  -2  -1  19 4628.30 546.575   3
  -2  -1  19 5071.21 733.258   1
  -2  -1  20 8032.93 909.708   1
  -2  -1  20 6675.57 649.927   3
  -2  -1  21 456.781 247.286   3
  -2  -1  21 484.577 380.513   1
  -2  -1  22 797.230 411.414   1
  -2  -1  22 1664.95 384.137   3
  -2  -1  23 8303.62 985.107   1
  -2  -1  23 6681.86 741.076   3
  -2  -1  24 20533.3 1548.45   1
  -2  -1  24 20300.7 1289.74   3
  -2  -1  25 3577.22 730.909   1
  -2  -1  25 3975.72 628.556   3
  -2  -1  26 804.126 380.603   1
  -2  -1  26 1292.79 444.882   3
  -2  -1  27 7216.92 853.656   3
  -2  -1  27 6141.12 946.326   1
   2   1  28 1279.90 608.635   3
  -2  -1  28 1332.78 536.411   1
  -2  -1  28 2042.21 570.936   3
  -2  -1  29 816.109 484.123   1
   2   1  29 1224.03 487.979   3
  -2  -1  29 1354.38 451.639   3
  -2  -1  30 4122.39 721.302   3
  -2  -1  30 3185.24 682.278   1
   2   1  30 3929.27 871.928   3
   2   1  31 737.268 448.874   3
  -2  -1  31 809.929 416.040   3
  -2  -1  31 1585.75 573.108   1
  -2  -1  32 538.029 480.919   1
  -2  -1  32 427.223 330.129   3
   2   1  32 343.146 475.844   3
  -2  -1  33 222.275 412.295   1
   2   1  33 2103.43 669.642   3
  -2  -1  34 384.333 418.329   1
   2   1  34 113.272 376.778   3
  -2   2  34 1196.93 463.928   3
  -2   2  33 1116.87 483.659   3
  -2   2  32 2129.23 610.873   3
  -2   2  31 888.431 510.386   3
  -2   2  30 3682.21 731.040   3
   2  -2  30 3193.93 630.414   1
   2  -2  29 3524.71 598.456   1
  -2   2  29 5673.20 909.317   3
   2  -2  28 916.570 350.441   1
  -2   2  28 1061.75 444.541   3
   2  -2  27 1106.50 407.855   1
  -2   2  27 1149.34 447.871   3
  -2   2  26 1103.60 422.583   3
   2  -2  26 620.784 340.638   1
   2  -2  25 4624.27 624.188   1
  -2   2  25 6106.60 861.114   3
   2  -2  24 6689.51 756.322   1
  -2   2  24 9309.48 1026.91   3
  -2   2  23 288.984 273.078   3
   2  -2  23 459.020 236.601   1
   2  -2  22 462.992 252.350   1
  -2   2  22 877.821 421.256   3
   2  -2  21 9496.30 792.901   1
  -2   2  21 10840.4 1001.72   3
  -2   2  20 3388.26 591.946   3
   2  -2  20 2502.54 425.760   1
  -2   2  19 2678.82 537.449   3
  -2   2  18 24461.9 1393.30   3
  -2  -2 -18 22901.9 1016.94   1
  -2   2  17 957.103 336.936   3
  -2  -2 -17 622.954 193.772   1
  -2   2  16 3107.28 479.773   3
  -2  -2 -16 2944.98 363.379   1
  -2   2  15 24251.3 1239.58   3
  -2  -2 -15 23995.7 959.463   1
  -2   2  14 994.658 309.571   3
  -2  -2 -14 711.335 183.031   1
  -2  -2 -13 1784.35 260.131   1
  -2   2  13 2198.96 396.734   3
  -2   2  12 15297.8 893.762   3
  -2  -2 -12 16899.9 712.771   1
  -2   2  11 1152.56 274.131   3
  -2  -2 -11 1444.78 226.657   1
  -2   2  10 7053.91 551.351   3
  -2   2   9 22952.8 969.054   3
  -2   2   8 1551.15 279.199   3
  -2   2   7 6144.75 489.663   3
  -2  -2  -6 204492. 2951.48   2
  -2   2   6 206579. 2747.20   3
  -2  -2  -5 9749.00 619.857   2
  -2   2   5 9062.98 569.676   3
  -2  -2  -4 4850.49 431.804   2
  -2   2   4 5507.15 451.821   3
   2   2  -4 4156.86 208.529   3
  -2  -2  -3 237187. 2897.17   2
  -2   2   3 241480. 2843.20   3
  -2   2   2 727.012 208.516   3
   2  -2   2 446.379 108.571   2
  -2  -2  -2 311.952 124.108   2
   2   2  -2 405.058 94.7632   3
   2   2  -1 4721.86 304.703   3
   2  -2   1 4183.33 255.997   2
  -2  -2  -1 5234.83 427.779   2
   2  -2   0 32216.3 1071.20   3
   2   2   0 31814.7 831.167   3
   2   2   0 31143.3 986.608   2
   2   2   1 3668.82 305.311   3
   2  -2  -1 3211.25 336.317   3
   2   2   1 3941.28 355.913   2
   2   2   2 371.783 149.688   2
   2   2   2 276.370 128.902   3
   2  -2  -2 500.185 141.094   3
  -2   2  -2 370.935 90.3148   2
   2  -2  -3 217241. 2694.79   3
  -2   2  -3 220776. 2038.09   2
   2   2   3 225038. 2773.75   2
  -2  -2   3 223850. 1705.95   3
   2   2   3 226457. 2641.88   3
  -2  -2   4 3796.59 198.247   3
   2  -2  -4 5620.48 437.264   3
  -2   2  -4 4909.19 335.712   2
   2  -2  -5 8712.21 550.987   3
   2  -2  -5 8566.39 598.442   1
   2  -2  -6 219706. 3089.92   1
   2  -2  -6 230662. 2832.95   3
   2  -2  -7 6001.22 526.623   1
   2  -2  -7 6114.50 482.614   3
   2  -2  -8 1719.16 271.798   3
   2  -2  -8 1516.50 302.807   1
   2  -2  -9 18375.8 998.499   1
   2  -2  -9 19665.8 912.959   3
   2  -2 -10 7548.94 595.719   3
   2  -2 -10 7829.24 697.441   1
   2  -2 -11 1018.26 284.225   1
   2  -2 -11 1003.48 234.994   3
   2  -2 -12 18727.5 995.407   3
   2  -2 -12 19421.1 1142.92   1
   2  -2 -13 1419.37 357.420   1
   2  -2 -13 1821.25 335.879   3
   2  -2 -14 712.826 283.987   1
   2  -2 -14 1409.43 319.615   3
   2  -2 -15 23766.7 1408.63   1
  -2  -2  16 3211.01 581.870   1
   2  -2 -16 3126.60 576.861   1
  -2  -2  17 318.748 289.676   1
   2  -2 -17 747.369 385.377   1
  -2  -2  18 20856.0 1474.52   1
  -2  -2  19 1862.48 511.417   1
  -2  -2  20 1999.98 529.910   1
  -2  -2  21 10249.8 1094.54   1
   2   2  21 10344.7 1045.80   3
  -2  -2  22 722.363 343.267   1
   2   2  22 230.748 246.985   3
   2   2  23 728.686 467.626   3
  -2  -2  23 355.194 272.773   1
  -2  -2  23 264.657 208.956   3
   2   2  24 9776.19 1113.81   3
  -2  -2  24 8470.18 1068.10   1
  -2  -2  24 7359.56 769.670   3
   2   2  25 3922.28 761.584   3
  -2  -2  25 4718.67 830.356   1
  -2  -2  25 4436.54 622.799   3
  -2  -2  26 936.305 454.012   1
   2   2  26 1601.22 573.868   3
  -2  -2  26 1240.51 390.214   3
  -2  -2  27 1216.29 357.042   3
   2   2  27 1021.79 545.818   3
  -2  -2  27 819.507 470.748   1
   2   2  28 844.358 489.411   3
  -2  -2  28 480.680 371.993   1
  -2  -2  28 966.737 363.138   3
  -2  -2  29 2824.07 560.043   3
   2   2  29 2630.08 735.280   3
  -2  -2  29 3630.38 784.743   1
  -2  -2  30 3353.39 788.008   1
   2   2  30 3041.37 746.788   3
  -2  -2  30 3484.65 653.176   3
  -2  -2  31 1007.95 483.138   1
   2   2  31 746.623 386.599   3
  -2  -2  32 2165.12 630.145   1
   2   2  32 2572.09 765.156   3
   2   2  33 947.562 490.161   3
  -2  -2  33 794.688 451.781   1
  -2  -2  34 433.676 420.414   1
   2   2  34-122.919 372.031   3
  -2   3  33 625.732 376.434   3
  -2   3  32-135.518 344.987   3
  -2   3  31 3402.27 810.360   3
  -2   3  30 1145.88 469.518   3
  -2   3  29 252.678 325.352   3
   2  -3  29 827.674 400.095   1
  -2   3  28 2248.52 626.380   3
   2  -3  28 2325.80 557.379   1
   2  -3  27 14541.1 1209.24   1
  -2   3  27 18780.7 1573.05   3
   2  -3  26 1683.68 467.195   1
  -2   3  26 2104.21 566.743   3
   2  -3  25 5599.80 725.974   1
  -2   3  25 7635.98 991.352   3
   2  -3  24 4240.76 627.001   1
  -2   3  24 5114.37 782.784   3
   2  -3  23 8156.06 865.776   1
  -2  -3 -23 7441.57 739.569   1
  -2   3  23 9720.21 1055.07   3
  -2   3  22 4530.14 739.191   3
  -2  -3 -22 4585.93 573.474   1
  -2  -3 -21 2739.05 438.875   1
  -2   3  21 3104.12 616.914   3
  -2   3  20 968.406 389.681   3
  -2  -3 -20 618.225 244.524   1
  -2   3  19 1479.21 399.657   3
  -2  -3 -19 1015.06 295.525   1
  -2  -3 -18 6906.29 637.166   1
  -2   3  18 6589.19 793.330   3
  -2  -3 -17 4270.42 488.502   1
  -2   3  17 4509.75 661.692   3
  -2   3  16 270.179 317.039   3
  -2  -3 -16-111.080 204.471   1
  -2  -3 -15 61500.4 1707.89   1
  -2   3  15 62489.6 2119.65   3
  -2   3  14 5944.32 672.643   3
  -2  -3 -14 4989.11 482.169   1
  -2   3  13 6025.90 654.522   3
  -2   3  12 13289.0 901.798   3
  -2   3  11 5925.14 602.558   3
  -2   3  10 9281.41 716.309   3
  -2   3   9 51546.3 1622.16   3
  -2   3   8 6616.08 587.296   3
  -2   3   7 1270.13 293.307   3
  -2  -3  -7 1016.50 235.674   2
  -2   3   6 4546.41 465.725   3
  -2  -3  -6 4681.90 482.960   2
  -2   3   5 2517.27 371.665   3
   2   3  -5 2138.34 216.343   3
  -2  -3  -5 3040.74 383.525   2
  -2  -3  -4 726.996 201.614   2
  -2   3   4 1092.85 243.502   3
   2   3  -4 1167.76 171.575   3
  -2  -3  -3 39953.3 1256.78   3
  -2  -3  -3 36694.9 1221.30   2
  -2   3   3 36732.1 1281.56   3
   2   3  -3 36376.4 901.698   3
  -2   3   2 3918.81 427.019   3
  -2  -3  -2 4372.83 421.696   3
   2   3  -2 4277.26 338.521   3
  -2  -3  -2 5069.55 449.791   2
  -2  -3  -1 3357.21 359.061   3
  -2   3   1 3066.75 406.678   3
   2  -3   1 3226.92 405.681   3
   2  -3   1 2239.13 157.790   2
   2   3  -1 3053.44 308.368   3
   2   3  -1 3062.10 348.703   2
   2   3   0 1359.91 234.723   3
   2  -3   0 1601.32 291.083   3
   2   3   0 810.968 194.120   2
  -2  -3   0 1544.00 234.523   3
   2  -3  -1 3277.72 396.021   3
   2   3   1 2810.60 318.581   2
   2   3   1 3361.33 347.610   3
  -2  -3   1 2893.76 295.633   3
   2   3   2 5477.90 461.419   3
   2  -3  -2 5585.65 504.690   3
   2   3   2 5670.80 463.019   2
  -2  -3   2 4899.72 354.850   3
   2  -3  -3 30306.9 1171.69   3
  -2  -3   3 27199.5 781.134   3
   2   3   3 30248.1 1096.72   3
   2   3   3 32141.9 1109.52   2
  -2   3  -3 28268.5 629.591   2
  -2   3  -4 1213.13 157.554   2
   2   3   4 853.101 218.931   3
  -2  -3   4 1239.37 174.766   3
   2  -3  -4 1137.63 254.644   3
   2   3   5 2129.58 341.220   3
  -2  -3   5 2117.02 220.744   3
   2  -3  -5 3230.91 391.408   3
   2   3   6 5812.39 532.051   3
   2  -3  -6 5121.18 501.168   3
  -2  -3   6 4981.59 324.350   3
   2  -3  -7 1067.35 264.677   3
   2   3   7 1137.18 290.579   3
  -2  -3   7 997.253 162.616   3
   2   3   8 6132.38 607.758   3
   2  -3  -8 5833.51 589.625   1
  -2  -3   8 5287.24 340.591   3
   2  -3  -8 5308.18 535.916   3
   2  -3  -9 44083.2 1540.65   3
  -2  -3   9 41777.0 991.736   3
   2   3   9 43372.6 1574.72   3
   2  -3  -9 43325.0 1628.93   1
   2   3  10 10717.2 847.716   3
   2  -3 -10 10129.0 812.317   1
   2  -3 -10 10844.9 795.331   3
   2   3  11 6775.90 677.335   3
   2  -3 -11 6193.24 654.228   1
   2  -3 -11 7038.79 645.096   3
   2  -3 -12 13214.3 965.970   1
   2  -3 -12 14248.4 955.027   3
   2   3  12 13900.5 987.814   3
   2   3  13 6025.93 693.573   3
   2  -3 -13 5621.83 615.483   3
   2  -3 -13 6305.05 674.065   1
   2   3  14 5535.44 689.197   3
   2  -3 -14 5358.17 664.312   1
   2  -3 -14 5085.78 594.198   3
   2   3  15 53344.4 2082.17   3
   2  -3 -15 53423.8 1945.31   3
   2  -3 -15 49757.1 2050.99   1
   2   3  16 666.680 408.654   3
   2  -3 -16 215.337 227.153   3
   2   3  17 5026.37 729.709   3
   2   3  18 6914.07 835.424   3
   2   3  19 1681.27 467.951   3
   2   3  20 1228.79 394.484   3
  -2  -3  20 1428.89 470.457   1
   2   3  21 3971.66 692.437   3
  -2  -3  21 3320.18 681.484   1
   2   3  22 3544.46 718.502   3
  -2  -3  22 4272.27 802.365   1
  -2  -3  23 7294.21 1009.06   1
   2   3  23 6818.33 916.936   3
   2   3  24 4128.81 761.289   3
  -2  -3  24 4924.51 887.116   1
  -2  -3  25 3839.49 859.042   1
   2   3  25 4290.95 825.992   3
   2   3  26 3223.39 721.035   3
  -2  -3  26 1746.37 602.556   1
   2   3  27 18751.2 1657.55   3
  -2  -3  27 16238.8 1576.95   1
  -2  -3  28 1976.65 487.572   3
   2   3  28 2724.18 726.197   3
  -2  -3  28 1793.60 625.984   1
   2   3  29 1777.02 704.197   3
  -2  -3  29 1086.30 415.416   3
  -2  -3  29 310.000 348.176   1
   2   3  30 1669.60 646.531   3
  -2  -3  30 488.765 316.345   3
  -2  -3  30 674.671 496.860   1
   2   3  31 2816.10 760.259   3
  -2  -3  31 2150.72 657.490   1
   2   3  32 570.793 434.087   3
  -2  -3  32 97.3065 374.247   1
   2   3  33 942.370 510.586   3
  -2  -3  33 808.566 548.176   1
  -2   4  33 1594.10 651.955   3
  -2   4  32 1400.48 662.873   3
  -2   4  31 4027.01 880.824   3
   2  -4  30 2359.00 594.481   1
  -2   4  30 2687.17 690.885   3
  -2   4  29 1328.07 619.519   3
   2  -4  29 1406.96 479.042   1
   2  -4  28 0.57343 257.938   1
  -2   4  28-370.130 415.639   3
  -2   4  27 6495.98 957.606   3
   2  -4  27 5872.31 833.326   1
  -2   4  26 651.914 383.210   3
  -2   4  25 702.493 376.576   3
  -2   4  24 5122.68 825.853   3
  -2  -4 -23 200.954 191.290   1
  -2   4  23 245.019 370.317   3
  -2   4  22 3292.81 666.401   3
  -2  -4 -22 2920.32 504.091   1
  -2  -4 -21 389.581 194.614   1
  -2   4  21 729.458 418.858   3
  -2  -4 -20 1065.30 318.205   1
  -2   4  20 1871.16 512.695   3
  -2  -4 -19 1689.41 394.482   1
  -2   4  19 2321.30 561.459   3
  -2   4  18 31988.0 1741.26   3
  -2  -4 -18 32700.6 1502.96   1
  -2   4  17 705.789 318.246   3
  -2  -4 -17 941.002 289.195   1
  -2   4  16 1360.40 433.404   3
  -2  -4 -16 1471.32 329.639   1
  -2   4  15 38695.4 1781.71   3
  -2   4  14 3431.00 553.982   3
  -2   4  13 750.454 316.726   3
  -2   4  12 10585.7 866.957   3
  -2   4  11 2742.17 442.806   3
  -2   4  10 2278.68 404.323   3
  -2   4   9 6334.05 651.412   3
  -2  -4  -8 7421.13 677.520   2
  -2   4   8 6939.37 663.947   3
  -2  -4  -7 2237.07 362.011   2
  -2   4   7 2152.03 407.344   3
  -2   4   6 120550. 2651.35   3
  -2  -4  -6 127569. 2572.74   2
  -2  -4  -6 127671. 2728.55   3
   2   4  -5 1963.71 263.630   3
  -2  -4  -5 2001.73 356.097   2
  -2  -4  -5 2125.56 375.847   3
  -2   4   5 2242.57 405.402   3
  -2  -4  -4 1101.90 278.081   3
  -2   4   4 333.213 181.442   3
   2  -4   4 865.797 283.193   3
  -2  -4  -4 776.931 223.609   2
   2   4  -4 535.866 154.645   3
   2   4  -3 12142.1 641.391   3
  -2  -4  -3 11715.1 722.402   2
  -2   4   3 12073.0 826.797   3
   2  -4   3 11319.4 840.858   3
  -2  -4  -3 12968.7 803.289   3
  -2  -4  -2 4279.42 458.829   2
  -2   4   2 3854.10 497.476   3
   2   4  -2 3903.23 374.957   3
   2  -4   2 4383.64 536.085   3
  -2  -4  -2 4241.13 462.832   3
   2   4  -1 5560.01 477.633   2
   2  -4   1 5661.74 592.116   3
   2   4  -1 5782.96 474.364   3
  -2  -4  -1 5753.08 514.838   3
  -2   4   1 5793.62 571.050   3
   2   4   0 531.251 198.905   3
   2  -4   0 593.098 240.260   3
  -2  -4   0 316.106 162.035   3
   2   4   0 305.976 158.534   2
   2  -4  -1 5193.37 551.817   3
   2   4   1 5602.02 477.655   2
   2   4   1 5440.16 504.535   3
  -2  -4   1 5241.20 461.088   3
   2   4   2 3208.37 395.752   3
   2  -4  -2 3725.63 487.536   3
  -2  -4   2 3615.04 374.288   3
   2   4   2 3977.41 403.913   2
   2   4   3 9633.77 636.718   2
  -2  -4   3 8538.63 553.258   3
   2   4   3 8781.71 659.796   3
   2  -4  -3 9307.41 733.935   3
  -2  -4   4 539.345 164.132   3
  -2   4  -4 697.569 112.553   2
   2   4   4 711.513 251.867   3
   2  -4  -4 951.502 250.819   3
   2  -4  -5 2084.70 366.356   3
  -2  -4   5 1359.64 234.173   3
   2   4   5 1940.52 343.722   3
  -2  -4   6 140337. 2107.79   3
   2  -4  -6 133934. 2814.18   3
   2   4   6 142392. 2831.93   3
   2   4   7 1645.16 363.728   3
  -2  -4   7 2179.81 270.926   3
   2  -4  -7 1690.05 346.513   3
   2   4   8 6363.45 660.037   3
  -2  -4   8 6133.47 455.795   3
   2  -4  -8 7698.05 699.947   3
  -2  -4   9 3816.22 368.522   3
   2   4   9 4092.15 533.821   3
   2  -4  -9 3120.56 450.249   3
   2  -4 -10 2246.99 419.937   3
   2   4  10 2086.69 379.127   3
  -2  -4  10 1665.87 252.594   3
   2  -4 -11 2759.93 446.633   3
  -2  -4  11 2290.60 309.098   3
   2   4  11 2780.42 443.400   3
   2  -4 -11 3369.80 519.776   1
   2   4  12 11367.3 943.748   3
   2  -4 -12 12475.1 997.599   1
  -2  -4  12 12813.9 748.955   3
   2  -4 -12 12848.2 967.594   3
   2  -4 -13 525.613 262.504   1
   2  -4 -13 398.589 260.655   3
   2   4  13 79.5817 210.482   3
   2  -4 -14 3245.60 535.996   3
   2   4  14 3068.57 572.451   3
   2   4  15 40043.0 1850.21   3
   2   4  16 1261.76 461.677   3
   2   4  17 551.103 304.155   3
   2   4  18 28811.9 1674.38   3
   2   4  19 2340.97 608.544   3
   2   4  20 832.804 347.494   3
   2   4  21 578.914 352.975   3
   2   4  22 3162.02 665.911   3
   2   4  23-200.674 378.228   3
  -2  -4  24 5765.55 960.463   1
   2   4  24 5355.35 884.835   3
  -2  -4  25 1256.44 486.026   1
   2   4  25 357.619 338.415   3
  -2  -4  26 523.117 318.279   1
   2   4  26 418.630 401.816   3
  -2  -4  27 7012.45 1113.96   1
   2   4  27 6439.66 1017.10   3
  -2  -4  28-184.366 372.863   1
   2   4  28 261.307 326.507   3
  -2  -4  29 439.004 403.487   1
   2   4  29 715.969 431.902   3
   2   4  30 2302.61 624.780   3
  -2  -4  30 3159.47 818.430   1
   2   4  31 3742.05 882.761   3
  -2  -4  31 2809.46 833.157   1
  -2  -4  32 1224.29 594.193   1
   2   4  32 2980.87 739.424   3
  -2  -4  33-28.7989 347.254   1
   2   4  33 36.8840 303.994   3
  -2   5  32 1222.49 539.204   3
  -2   5  31 682.257 458.489   3
   2  -5  30 3099.45 731.610   1
  -2   5  30 4214.15 850.362   3
  -2   5  29 4520.81 888.524   3
   2  -5  29 3269.00 688.456   1
  -2   5  28 1001.62 515.884   3
  -2   5  27 8110.03 1156.31   3
  -2   5  26 333.270 400.283   3
  -2   5  25 2261.38 623.020   3
  -2   5  24 354.362 400.138   3
  -2  -5 -23 7775.27 871.132   1
  -2   5  23 9915.51 1186.20   3
  -2   5  22 8558.76 1080.95   3
  -2  -5 -22 8121.45 890.381   1
  -2   5  21 13125.5 1267.39   3
  -2  -5 -21 12825.8 1092.04   1
  -2   5  20 1404.40 473.333   3
  -2  -5 -20 1982.45 439.611   1
  -2   5  19 2615.41 663.228   3
  -2  -5 -19 2006.87 411.880   1
  -2  -5 -18 8348.37 846.105   1
  -2   5  18 8033.44 936.303   3
  -2   5  17 2766.14 535.040   3
  -2   5  16-119.023 255.360   3
  -2   5  15 25590.4 1536.62   3
  -2   5  14 1663.65 445.456   3
  -2   5  13 496.746 238.216   3
  -2   5  12 17440.8 1196.33   3
  -2   5  11 2685.96 511.475   3
  -2   5  10 5292.42 658.582   3
  -2  -5 -10 5003.68 642.273   2
  -2   5   9 28775.6 1484.42   3
  -2  -5  -9 26260.2 1376.61   2
  -2   5   8 848.247 305.128   3
  -2  -5  -8 1144.07 328.849   3
  -2  -5  -8 1323.16 325.313   2
  -2  -5  -7 2224.16 403.930   3
  -2  -5  -7 2942.12 449.372   2
  -2   5   7 2876.53 486.879   3
   2  -5   6 33005.2 1604.03   3
  -2   5   6 32146.3 1498.76   3
  -2  -5  -6 32896.1 1344.20   2
   2   5  -6 35004.8 1222.34   3
  -2  -5  -6 32333.7 1477.84   3
   2  -5   5 3762.90 550.730   3
  -2  -5  -5 3381.64 466.166   3
   2   5  -5 3155.57 390.509   3
  -2   5   5 3265.66 487.129   3
  -2  -5  -5 3372.99 429.340   2
   2   5  -4 3069.29 385.336   3
  -2  -5  -4 3367.55 469.505   3
  -2  -5  -4 3409.56 445.323   2
  -2   5   4 4351.73 588.473   3
   2  -5   4 3588.96 523.401   3
  -2   5   3 61839.3 2044.08   3
   2  -5   3 65250.5 2197.40   3
   2   5  -3 63547.5 1668.60   3
  -2  -5  -3 65469.8 1955.73   3
  -2  -5  -3 61230.5 1805.10   2
   2   5  -2 2888.50 385.403   3
  -2  -5  -2 3264.86 412.620   2
  -2  -5  -2 3050.46 434.822   3
  -2   5   2 2555.83 447.647   3
   2  -5   2 2833.55 439.910   3
   2   5  -2 3403.57 409.232   2
  -2  -5  -1 767.636 236.226   3
   2   5  -1 717.950 233.092   3
  -2   5   1 574.968 237.477   3
   2   5  -1 675.029 227.924   2
   2  -5   1 994.678 314.328   3
   2   5   0 23212.2 984.823   2
   2   5   0 21652.0 1055.29   3
   2  -5   0 20858.8 1233.87   3
  -2  -5   0 21448.4 1065.52   3
  -2   5   0 20614.3 1164.73   3
   2   5   1 126.739 166.664   3
   2  -5  -1 623.364 259.534   3
   2   5   1 579.993 203.012   2
  -2  -5   1 492.115 212.506   3
  -2  -5   2 3031.27 411.298   3
   2   5   2 3312.11 402.497   2
   2   5   2 3312.27 460.177   3
   2  -5  -2 3455.13 522.406   3
   2   5   3 66047.8 1740.29   2
   2  -5  -3 62510.1 2099.43   3
   2   5   3 60771.0 1891.18   3
  -2  -5   3 61601.3 1727.81   3
   2  -5  -4 3920.01 551.100   3
   2   5   4 3615.34 488.584   3
  -2  -5   4 3456.14 417.383   3
   2   5   5 2661.72 432.142   3
  -2  -5   5 3064.09 383.844   3
  -2   5  -5 2222.87 182.174   2
   2  -5  -5 3702.90 540.782   3
   2  -5  -6 33988.6 1556.73   3
  -2  -5   6 32081.3 1201.10   3
   2   5   6 35299.3 1536.47   3
   2  -5  -7 1935.44 385.314   3
   2   5   7 2196.94 433.119   3
  -2  -5   7 2786.35 368.713   3
   2  -5  -8 813.661 305.799   3
  -2  -5   8 499.906 214.728   3
   2   5   8 794.358 321.199   3
   2   5   9 24861.2 1346.40   3
  -2  -5   9 24553.5 1056.74   3
   2  -5  -9 25687.7 1425.63   3
   2  -5 -10 5846.65 704.047   3
  -2  -5  10 5733.50 524.056   3
   2   5  10 5857.53 700.193   3
   2   5  11 3709.91 596.150   3
  -2  -5  11 3654.65 431.732   3
   2   5  12 16853.3 1200.04   3
  -2  -5  12 16558.4 928.333   3
   2   5  13 666.823 330.330   3
  -2  -5  13 910.114 260.954   3
   2   5  14 1142.63 351.546   3
  -2  -5  14 1395.55 338.346   3
  -2  -5  15 20912.8 1172.02   3
   2   5  15 17852.9 1348.93   3
   2   5  16-87.1520 281.800   3
  -2  -5  16 263.163 207.870   3
   2   5  17 3195.10 639.740   3
   2   5  18 8595.38 960.850   3
   2   5  19 2513.85 557.327   3
   2   5  20 819.362 411.930   3
   2   5  21 15228.6 1399.46   3
   2   5  22 9306.73 1097.39   3
   2   5  23 9551.90 1124.95   3
   2   5  24 58.6908 463.305   3
   2   5  25 944.501 513.538   3
   2   5  26 303.383 438.238   3
   2   5  27 8634.94 1159.39   3
  -2  -5  27 7364.85 1154.11   1
  -2  -5  28 579.946 429.247   1
   2   5  28 812.027 436.235   3
  -2  -5  29 4201.48 889.824   1
   2   5  29 4606.45 896.232   3
  -2  -5  30 3582.59 901.880   1
   2   5  30 4474.35 901.563   3
  -2  -5  31 541.438 453.527   1
   2   5  31 1264.09 631.321   3
   2   5  32 2579.37 742.035   3
  -2  -5  32 915.078 623.571   1
  -2   6  31 1580.48 558.554   3
  -2   6  30 3327.08 887.925   3
  -2   6  29 450.645 531.817   3
  -2   6  28 494.597 348.813   3
  -2   6  27 94.0923 302.811   3
  -2   6  26 1964.99 632.681   3
  -2   6  25 109.032 344.373   3
  -2   6  24 2824.24 710.341   3
  -2   6  23 1056.80 418.545   3
  -2   6  22 975.574 499.537   3
  -2   6  21 5252.67 899.115   3
  -2   6  20 2371.84 616.257   3
  -2   6  19 3785.46 770.204   3
  -2   6  18 17946.8 1464.55   3
  -2   6  17 8405.75 1007.52   3
  -2   6  16 4575.66 761.004   3
  -2   6  15 5414.02 768.392   3
  -2   6  14 1585.21 467.028   3
  -2   6  13 2059.70 503.177   3
  -2   6  12 2207.93 481.072   3
  -2  -6 -11 4780.18 676.677   2
  -2   6  11 3463.18 622.173   3
  -2  -6 -10 1900.22 436.740   2
  -2   6  10 1946.00 447.865   3
  -2   6   9 19206.8 1286.36   3
  -2  -6  -9 21728.6 1256.38   2
  -2  -6  -8 3888.72 525.548   2
  -2   6   8 2758.57 501.058   3
  -2  -6  -7 3618.89 483.053   2
   2  -6   7 3430.30 575.621   3
  -2   6   7 3650.69 572.521   3
  -2  -6  -6 24165.7 1384.92   3
  -2   6   6 23383.0 1367.70   3
  -2  -6  -6 23179.8 1193.04   2
   2  -6   6 23649.1 1480.86   3
   2   6  -6 22780.6 1123.87   3
   2   6  -5 675.969 220.950   3
  -2   6   5 1018.19 316.983   3
  -2  -6  -5 1056.51 300.536   2
   2  -6   5 790.590 310.705   3
  -2  -6  -5 942.523 293.851   3
  -2   6   4 3014.67 514.574   3
  -2  -6  -4 3411.99 441.637   2
   2  -6   4 2681.23 528.425   3
  -2  -6  -4 3344.56 513.471   3
   2   6  -4 2510.99 369.028   3
  -2  -6  -3 25898.6 1362.78   3
   2  -6   3 24323.0 1472.62   3
  -2   6   3 24470.0 1383.45   3
   2   6  -3 24143.2 1165.19   3
  -2  -6  -3 25062.6 1217.12   2
   2   6  -3 23134.6 1087.07   2
  -2   6   2 2681.94 480.085   3
   2  -6   2 2267.78 457.246   3
  -2  -6  -2 2139.99 399.219   3
   2   6  -2 1353.58 303.114   3
   2   6  -2 1942.16 322.881   2
   2   6  -1 3548.41 494.932   3
   2   6  -1 4010.30 437.579   2
  -2   6   1 4191.93 595.334   3
   2  -6   1 4082.74 616.114   3
  -2  -6  -1 5029.61 600.046   3
  -2  -6   0 34373.6 1507.04   3
   2   6   0 37839.8 1545.50   3
   2   6   0 34835.9 1320.45   2
   2  -6   0 35424.4 1745.40   3
  -2   6   0 33326.7 1607.59   3
   2   6   1 4350.33 495.596   2
  -2  -6   1 3786.11 530.676   3
   2  -6  -1 3685.71 584.256   3
   2   6   1 3460.40 492.618   3
  -2  -6   2 2839.66 450.226   3
   2  -6  -2 2962.24 520.353   3
   2   6   2 2358.54 387.161   2
   2   6   2 2475.21 464.918   3
  -2  -6   3 28560.3 1341.43   3
   2   6   3 26769.9 1369.43   3
   2  -6  -3 27795.0 1565.63   3
   2  -6  -4 2918.14 528.503   3
  -2  -6   4 3393.35 482.853   3
   2   6   4 2873.64 457.202   3
  -2  -6   5 846.092 260.281   3
   2   6   5 771.100 282.140   3
   2   6   6 33044.4 1595.58   3
  -2  -6   6 28474.5 1296.12   3
  -2  -6   7 3537.43 466.000   3
   2   6   7 3983.18 597.719   3
   2   6   8 3752.31 599.170   3
  -2  -6   8 2442.96 396.729   3
   2   6   9 25037.2 1492.62   3
  -2  -6   9 23972.2 1187.64   3
   2   6  10 2671.68 544.752   3
  -2  -6  10 2656.90 428.239   3
  -2  -6  11 4487.48 537.747   3
   2   6  11 4628.39 683.808   3
   2   6  12 4076.70 652.306   3
  -2  -6  12 2838.47 431.910   3
   2   6  13 1948.50 510.569   3
  -2  -6  13 1990.88 398.081   3
   2   6  14 3450.59 631.633   3
  -2  -6  14 1865.25 396.054   3
  -2  -6  15 5462.70 666.430   3
   2   6  15 5741.19 784.499   3
   2   6  16 5726.81 811.439   3
  -2  -6  16 5744.90 701.147   3
  -2  -6  17 7350.45 839.337   3
   2   6  17 7925.49 964.764   3
  -2  -6  18 20308.4 1370.87   3
   2   6  18 19829.6 1499.59   3
   2   6  19 3656.77 639.519   3
  -2  -6  19 3728.87 640.141   3
   2   6  20 2540.17 589.973   3
  -2  -6  20 1863.92 408.645   3
   2   6  21 5980.28 922.970   3
  -2  -6  21 4738.79 689.450   3
   2   6  22 603.343 355.281   3
   2   6  23 590.890 404.540   3
   2   6  24 2489.00 668.020   3
   2   6  25 520.095 403.405   3
   2   6  26 1979.80 570.078   3
   2   6  27 370.454 522.836   3
   2   6  28-66.4685 337.909   3
   2   6  29 497.947 374.517   3
  -2  -6  29 418.270 488.078   1
  -2  -6  30 2010.84 640.543   1
   2   6  30 2439.17 702.741   3
  -2  -6  31 316.226 551.779   1
   2   6  31 947.079 682.208   3
  -2   7  29 2061.42 682.240   3
  -2   7  28 3733.19 915.823   3
  -2   7  27 1542.13 605.413   3
  -2   7  26 1392.90 641.856   3
  -2   7  25 3926.25 876.436   3
  -2   7  24 8948.19 1202.53   3
  -2   7  23 3688.02 798.405   3
  -2   7  22 1892.41 646.165   3
  -2   7  21 14214.5 1448.21   3
  -2   7  20 3889.85 785.216   3
  -2   7  19 1193.40 501.659   3
  -2   7  18 14526.7 1376.57   3
  -2   7  17 4872.45 824.785   3
  -2   7  16 173.844 350.461   3
  -2   7  15 12641.4 1228.97   3
  -2   7  14 1141.12 431.266   3
  -2   7  13 341.478 412.237   3
  -2   7  12 29755.2 1809.45   3
  -2   7  11 1733.28 443.769   3
  -2  -7 -10 3630.79 566.565   2
  -2   7  10 3396.39 607.734   3
  -2  -7  -9 5578.45 666.489   2
  -2   7   9 7353.01 856.939   3
  -2   7   8 732.587 329.220   3
  -2  -7  -8 681.837 250.722   2
  -2  -7  -7 1610.58 352.853   2
  -2   7   7 1404.69 375.241   3
  -2   7   6 5640.13 762.286   3
  -2  -7  -6 6082.36 639.553   2
   2   7  -6 5439.81 629.808   3
  -2  -7  -5 3213.79 470.211   2
  -2   7   5 2980.12 482.520   3
   2   7  -5 3724.02 509.402   3
   2   7  -5 3579.32 467.198   2
  -2   7   4 957.040 319.779   3
   2   7  -4 1005.14 308.204   3
  -2  -7  -4 1190.40 292.432   2
   2   7  -4 874.581 234.920   2
   2   7  -3 4107.41 487.484   2
   2   7  -3 3581.12 502.309   3
  -2   7   3 3421.78 592.329   3
  -2  -7  -2 1535.75 418.126   3
   2   7  -2 1529.94 296.064   2
   2   7  -2 1140.88 313.551   3
  -2   7   2 1160.41 390.967   3
  -2   7   1 3373.57 571.447   3
   2   7  -1 3354.24 445.005   2
  -2  -7  -1 2933.97 509.696   3
   2   7  -1 3440.68 539.796   3
   2   7   0 33079.6 1584.80   3
   2   7   0 34349.0 1371.27   2
  -2   7   0 29285.5 1618.09   3
  -2  -7   0 33126.0 1664.80   3
  -2  -7   1 2947.54 555.849   3
   2   7   1 3822.18 589.483   3
   2   7   1 3717.37 488.241   2
   2   7   2 1536.09 411.758   3
  -2  -7   2 1551.37 373.787   3
  -2  -7   3 6457.83 718.745   3
   2   7   3 6309.44 747.769   3
   2  -7  -3 4783.40 278.839   2
  -2  -7   4 1240.13 343.447   3
   2  -7  -4 1127.96 174.849   2
   2   7   4 1248.46 372.373   3
   2   7   5 3445.72 579.346   3
  -2  -7   5 3150.03 515.043   3
   2   7   6 6460.16 782.346   3
  -2  -7   6 5935.00 691.118   3
   2   7   7 1328.61 379.455   3
  -2  -7   7 1699.70 352.849   3
   2   7   8 1714.26 443.096   3
  -2  -7   8 1399.87 347.067   3
  -2  -7   9 5258.66 632.625   3
   2   7   9 6350.80 831.737   3
   2   7  10 4305.72 692.557   3
  -2  -7  10 3627.21 537.339   3
   2   7  11 2318.72 587.121   3
  -2  -7  11 1693.18 392.180   3
   2   7  12 31441.0 1820.45   3
  -2  -7  12 29340.6 1517.89   3
   2   7  13 339.390 338.100   3
  -2  -7  13 309.784 227.780   3
   2   7  14 1858.60 597.644   3
  -2  -7  14 1333.96 362.945   3
  -2  -7  15 9989.70 943.693   3
   2   7  15 11035.0 1166.89   3
   2   7  16 179.448 272.014   3
  -2  -7  16 323.786 273.305   3
   2   7  17 5534.88 836.345   3
  -2  -7  17 5597.53 792.009   3
  -2  -7  18 10925.8 1117.55   3
   2   7  18 9424.62 1080.64   3
  -2  -7  19-31.5259 223.133   3
   2   7  19 936.216 482.978   3
   2   7  20 4663.58 874.951   3
   2   7  21 13965.9 1393.74   3
   2   7  22 710.625 439.660   3
   2   7  23 3884.63 816.813   3
   2   7  24 7678.28 1062.61   3
   2   7  25 3064.69 701.616   3
   2   7  26 926.523 537.981   3
   2   7  27 2692.48 717.854   3
   2   7  28 5254.64 958.571   3
   2   7  29 1865.72 611.889   3
  -2   8  28 1404.90 628.705   3
  -2   8  27 2523.60 779.435   3
  -2   8  26-564.015 469.628   3
  -2   8  25-98.1581 464.869   3
  -2   8  24 3561.39 854.712   3
  -2   8  23 236.587 349.087   3
  -2   8  22 234.465 398.210   3
  -2   8  21 15360.5 1570.30   3
  -2   8  20 1225.83 561.267   3
  -2   8  19-272.461 435.378   3
  -2   8  18 854.074 492.324   3
  -2   8  17 6969.98 1015.20   3
  -2   8  16 3528.18 751.923   3
  -2   8  15 4414.22 837.615   3
  -2   8  14 435.619 405.725   3
  -2   8  13 1921.30 559.107   3
  -2   8  12 6303.75 884.393   3
  -2   8  11 2754.36 592.084   3
  -2   8  10 314.912 261.823   3
  -2   8   9 16634.1 1379.21   3
  -2  -8  -8 5196.00 651.017   2
  -2   8   8 4279.46 716.060   3
  -2   8   7 1747.49 536.428   3
  -2  -8  -7 1854.32 409.601   2
  -2  -8  -6 2792.37 453.833   2
   2   8  -6 2947.92 456.004   2
  -2   8   6 3290.42 622.404   3
   2   8  -6 2886.07 516.682   3
   2   8  -5 2126.67 453.349   3
  -2  -8  -5 2120.16 425.821   2
  -2   8   5 1941.00 501.873   3
   2   8  -5 1917.35 363.574   2
  -2   8   4 3400.43 644.450   3
   2   8  -4 4129.12 586.972   3
   2   8  -4 3922.66 485.142   2
  -2   8   3 21181.5 1520.61   3
   2   8  -3 23410.5 1172.15   2
   2   8  -3 22700.6 1369.25   3
   2   8  -2 4153.43 509.620   2
   2   8  -2 4414.26 643.703   3
  -2   8   2 3397.41 612.334   3
   2   8  -1 799.450 343.506   3
  -2   8   1 377.378 318.286   3
   2   8  -1 1065.14 269.889   2
   2   8   0 37612.2 1527.50   2
  -2   8   0 34241.6 1874.41   3
   2   8   0 34653.1 1744.82   3
   2   8   1 968.526 371.116   3
   2   8   2 4482.79 654.169   3
   2   8   3 24917.1 1546.23   3
   2   8   4 3695.73 628.083   3
  -2  -8   4 3608.73 614.286   3
   2  -8  -4 3454.88 290.963   2
   2  -8  -5 2124.89 268.948   2
  -2  -8   5 2749.03 521.572   3
   2   8   5 2223.91 528.288   3
   2  -8  -6 3304.22 349.661   2
   2   8   6 3375.32 634.537   3
  -2  -8   6 3095.84 555.228   3
  -2  -8   7 1819.30 437.936   3
   2   8   7 2317.44 549.818   3
  -2  -8   8 4104.40 610.820   3
   2   8   8 4608.06 738.813   3
   2   8   9 21380.9 1550.60   3
  -2  -8   9 19426.6 1317.47   3
   2   8  10 614.613 379.131   3
  -2  -8  10 260.057 267.360   3
   2   8  11 2191.88 524.121   3
  -2  -8  11 2523.33 524.760   3
  -2  -8  12 6362.80 792.175   3
   2   8  12 7860.53 996.290   3
   2   8  13 2320.00 551.441   3
  -2  -8  13 2652.09 557.306   3
  -2  -8  14 578.531 318.982   3
   2   8  14 956.108 449.881   3
   2   8  15 2623.30 612.575   3
  -2  -8  15 4058.82 711.798   3
   2   8  16 4312.41 816.998   3
  -2  -8  16 3573.87 662.427   3
  -2  -8  17 5402.28 814.963   3
   2   8  17 6598.50 978.057   3
   2   8  18 1013.26 484.583   3
   2   8  19 124.200 302.531   3
   2   8  20 1882.85 609.236   3
   2   8  21 12017.3 1363.54   3
   2   8  22-127.896 378.477   3
   2   8  23 468.814 512.410   3
   2   8  24 3096.54 812.652   3
   2   8  25 324.004 392.934   3
   2   8  26-497.384 474.720   3
   2   8  27 874.152 551.291   3
   2   8  28 762.603 586.177   3
  -2   9  26 1983.65 703.799   3
  -2   9  25 968.159 546.920   3
  -2   9  24 5071.30 1033.58   3
  -2   9  23 2037.00 747.719   3
  -2   9  22 90.2505 412.317   3
  -2   9  21 7436.05 1140.43   3
  -2   9  20 4208.69 920.896   3
  -2   9  19 2240.25 713.942   3
  -2   9  18 1629.16 566.873   3
  -2   9  17 724.240 478.369   3
  -2   9  16-91.6511 331.658   3
  -2   9  15 5396.89 867.801   3
  -2   9  14 4802.43 842.591   3
  -2   9  13 5250.35 911.336   3
  -2   9  12 13953.8 1366.02   3
  -2   9  11-51.3263 439.140   3
  -2   9  10 3103.75 645.848   3
  -2   9   9 161.737 297.680   3
   2   9  -8 298.343 169.691   2
  -2   9   8 573.527 432.218   3
  -2   9   7 5993.61 909.303   3
  -2  -9  -7 3857.73 624.402   2
   2   9  -7 4468.85 574.936   2
  -2  -9  -6 2868.99 499.605   2
  -2   9   6 2526.74 598.103   3
   2   9  -6 2818.06 446.849   2
   2   9  -5 676.247 243.493   2
  -2   9   5 892.784 338.271   3
   2   9  -4 5575.63 722.734   3
  -2   9   4 7145.35 943.286   3
   2   9  -4 7709.17 709.292   2
   2   9  -3 6530.27 806.069   3
  -2   9   3 6626.80 905.285   3
   2   9  -3 6890.91 692.098   2
   2   9  -2 3003.23 465.361   2
   2   9  -2 2671.71 538.172   3
  -2   9   2 1934.86 553.530   3
  -2   9   1 3978.99 734.423   3
   2   9  -1 4212.65 680.336   3
   2   9  -1 4374.86 574.708   2
   2   9   0 29984.0 1747.08   3
   2   9   1 3654.30 659.923   3
   2   9   2 2110.12 501.189   3
   2   9   3 6662.75 887.596   3
   2   9   4 8985.09 1046.71   3
   2  -9  -5 1852.12 257.484   2
   2   9   5 1206.19 477.144   3
   2  -9  -6 3326.54 380.186   2
   2   9   6 3334.04 682.949   3
   2  -9  -7 6589.10 557.805   2
   2   9   7 6364.43 877.991   3
   2  -9  -8 500.148 224.343   2
   2   9   8 959.155 459.388   3
   2   9   9 1459.46 488.861   3
   2   9  10 2631.71 628.473   3
   2   9  11 96.7515 272.103   3
   2   9  12 10721.6 1185.07   3
   2   9  13 4765.13 844.349   3
   2   9  14 3542.10 740.792   3
   2   9  15 5888.01 939.657   3
   2   9  16 13.0462 408.436   3
   2   9  17 1351.53 491.587   3
   2   9  18 1517.19 591.090   3
   2   9  19 1169.88 551.089   3
   2   9  20 3968.35 828.953   3
   2   9  21 8009.93 1185.01   3
   2   9  22 1129.55 459.105   3
   2   9  23 655.365 372.789   3
   2   9  24 5587.35 960.441   3
   2   9  25 1283.71 590.972   3
   2   9  26 1477.45 580.408   3
  -2  10  23 1376.00 647.493   3
  -2  10  22 1476.30 682.026   3
  -2  10  21 3325.78 855.576   3
  -2  10  20 1767.58 733.445   3
  -2  10  19 454.561 378.302   3
  -2  10  18 3862.77 904.321   3
  -2  10  17 3014.28 766.709   3
  -2  10  16 389.882 368.085   3
  -2  10  15 5810.12 1042.08   3
  -2  10  14 5420.74 949.884   3
  -2  10  13 1947.47 634.858   3
  -2  10  12 6302.93 1017.52   3
  -2  10  11 1643.87 542.382   3
  -2  10  10-134.470 291.656   3
   2  10 -10 297.696 207.140   2
   2  10  -9 5649.51 681.632   2
  -2  10   9 5562.68 891.706   3
  -2  10   8 4228.94 777.390   3
   2  10  -8 2890.02 461.795   2
  -2  10   7 2449.38 649.205   3
   2  10  -7 2040.18 406.170   2
  -2  10   6 9136.78 1145.64   3
   2  10  -6 9346.71 816.387   2
   2  10  -5 240.020 201.630   2
   2  10  -5 252.373 253.176   3
  -2  10   5 860.062 471.074   3
   2  10  -4 2273.67 597.637   3
  -2  10   4 1576.50 536.559   3
   2  10  -4 2345.06 452.299   2
   2  10  -3 9931.20 1059.72   3
   2  10  -3 8415.97 777.085   2
  -2  10   3 6774.15 978.769   3
   2  10  -2 4638.38 764.179   3
  -2  10   2 3476.36 709.146   3
   2  10  -1 358.852 258.963   3
  -2  10   1 395.973 358.503   3
   2  10   0 11878.1 1188.55   3
   2  10   1 40.7227 319.280   3
   2  10   2 4435.30 765.169   3
   2  10   3 10875.7 1207.06   3
   2  10   4 1718.49 519.402   3
   2  10   5 473.877 386.902   3
   2  10   6 8385.35 1102.21   3
   2  10   7 3206.40 718.788   3
   2  10   8 3210.00 718.329   3
   2  10   9 7061.84 989.184   3
   2  10  10 301.097 407.133   3
   2  10  11 2104.79 583.028   3
   2  10  12 5470.66 897.821   3
   2  10  13 953.841 399.798   3
   2  10  14 4919.35 910.076   3
   2  10  15 4148.70 859.058   3
   2  10  16 21.6395 368.678   3
   2  10  17 3473.41 794.715   3
   2  10  18 3783.93 819.642   3
   2  10  19 791.549 439.893   3
   2  10  20 1229.08 537.846   3
   2  10  21 2421.19 721.353   3
   2  10  22 1534.62 532.525   3
   2  10  23 2438.27 663.615   3
  -2  11  20 2335.37 772.447   3
  -2  11  19 942.961 625.471   3
  -2  11  18 4924.93 1052.20   3
  -2  11  17 408.440 507.562   3
  -2  11  16 1544.01 709.114   3
  -2  11  15 17972.4 1765.91   3
  -2  11  14 1629.27 759.470   3
  -2  11  13 465.420 399.487   3
   2  11 -12 338.178 264.030   2
  -2  11  12 2771.50 702.795   3
  -2  11  11 965.404 438.197   3
  -2  11  10 1986.70 674.153   3
   2  11  -9 2523.94 460.978   2
  -2  11   9 3060.86 714.491   3
   2  11  -8 404.916 259.503   2
  -2  11   8-306.626 288.489   3
  -2  11   7 3839.31 772.698   3
   2  11  -7 3464.42 525.640   2
  -2  11   6 1782.11 545.694   3
   2  11  -6 2014.39 424.867   2
  -2  11   5 69.8671 321.383   3
   2  11  -5 556.200 287.332   2
  -2  11   4 1137.20 501.331   3
   2  11  -4 1321.88 506.172   3
   2  11  -3 7235.06 976.506   3
  -2  11   3 7140.78 1049.26   3
  -2  11   2 7278.54 1053.79   3
   2  11  -2 7974.25 1016.52   3
   2  11  -1 1944.19 554.513   3
   2  11   0 2137.37 590.758   3
   2  11   1 2957.83 643.678   3
   2  11   2 7300.30 1051.83   3
   2  11   3 7190.77 1037.43   3
   2  11   4 953.920 476.936   3
   2  11   5 541.286 430.679   3
   2  11   6 1532.25 549.997   3
   2  11   7 3913.65 852.654   3
   2  11   8 462.522 460.688   3
   2  11   9 3595.53 773.847   3
   2  11  10 1063.83 448.965   3
   2  11  11 662.859 421.451   3
   2  11  12 2654.51 769.722   3
   2  11  13 577.260 454.896   3
   2  11  14 861.832 522.202   3
   2  11  15 18808.4 1789.66   3
   2  11  16 447.673 446.820   3
   2  11  17 1460.38 663.533   3
   2  11  18 3321.59 835.451   3
   2  11  19 444.064 477.860   3
   2  11  20 1843.01 664.919   3
  -2  12  16 1012.80 655.573   3
  -2  12  15 306.359 343.835   3
  -2  12  14 5124.17 1069.20   3
  -2  12  13 5192.48 1018.66   3
  -2  12  12 323.057 446.962   3
  -2  12  11 747.489 563.935   3
  -2  12  10 1318.18 604.207   3
  -2  12   9 578.034 350.483   3
  -2  12   8 581.802 383.312   3
  -2  12   7 3222.62 797.608   3
  -2  12   6 7476.87 1137.32   3
  -2  12   5 1529.04 573.806   3
  -2  12   4 802.969 500.462   3
  -2  12   3 3565.09 854.245   3
   2  12  -3 3219.19 764.303   3
   2  12  -2 230.842 363.463   3
   2  12  -1 1150.92 423.159   3
   2  12   0 619.098 462.417   3
   2  12   1 2067.47 589.457   3
   2  12   2 1244.55 549.857   3
   2  12   3 3370.75 784.000   3
   2  12   4 735.844 395.521   3
   2  12   5 1611.83 591.302   3
   2  12   6 9041.03 1194.75   3
   2  12   7 3063.16 813.334   3
   2  12   8 873.282 460.653   3
   2  12   9 443.351 321.544   3
   2  12  10 1043.13 548.796   3
   2  12  11 1791.03 720.690   3
   2  12  12 1.77376 352.001   3
   2  12  13 5484.18 1010.63   3
   2  12  14 4443.83 940.814   3
   2  12  15 344.593 392.688   3
   2  12  16 490.077 401.432   3
  -2  13  11 1152.99 515.339   3
  -2  13  10 389.099 369.284   3
  -2  13   9 2470.91 748.740   3
  -2  13   8 836.328 504.147   3
  -2  13   7 1925.28 603.247   3
  -2  13   6 489.051 322.509   3
  -2  13   5-70.2031 461.344   3
  -2  13   4 254.137 365.923   3
   2  13  -2 1486.92 520.270   3
   2  13  -1 1560.59 558.105   3
   2  13   0 2903.21 830.719   3
   2  13   1 2715.39 719.599   3
   2  13   2 412.599 348.033   3
   2  13   3 3327.93 812.744   3
   2  13   4 62.5158 387.368   3
   2  13   5 847.822 501.086   3
   2  13   6 1941.34 671.074   3
   2  13   7 2615.25 771.917   3
   2  13   8 1041.20 529.099   3
   2  13   9 4367.59 939.990   3
   2  13  10-125.645 385.199   3
   2  13  11 1077.03 533.882   3
   3   0   0-60.7428 93.1804   1
   3   0   0 14.1442 112.204   2
  -3   0   0 16.9667 117.647   1
   3   0  -1 18279.5 750.869   1
   3   0   1 16842.5 781.526   2
   3   0   1 18508.4 673.820   1
  -3   0   1 17546.6 739.815   1
  -3   0  -1 17097.6 676.179   1
   3   0   2 126.285 112.824   1
   3   0   2 66.1902 118.609   2
  -3   0  -2 37.1979 96.9773   1
   3   0  -2 64.2439 124.709   1
  -3   0  -2-63.7124 137.200   2
  -3   0   2 151.940 148.060   1
   3   0   3 3259.07 363.596   2
  -3   0  -3 3704.95 390.734   2
   3   0   3 3837.26 271.129   1
   3   0  -3 3706.16 385.743   1
  -3   0  -3 3654.09 285.239   1
  -3   0   3 3372.23 369.467   1
   3   0  -4 5498.46 333.452   3
   3   0  -4 5919.43 502.149   1
  -3   0  -4 5110.63 473.248   2
  -3   0   4 4751.51 455.242   1
   3   0   4 4836.75 453.224   2
  -3   0  -4 5575.60 312.844   1
   3   0  -5-3.15777 60.9399   3
  -3   0  -5 93.7256 127.466   2
   3   0  -5 86.0984 151.265   1
  -3   0   6 57394.4 1645.07   1
  -3   0  -6 60148.7 1646.26   2
   3   0  -6 55814.0 982.110   3
   3   0  -6 59141.2 1690.74   1
   3   0  -7 14710.5 886.000   1
  -3   0   7 13665.8 852.812   1
   3   0  -7 12935.4 483.738   3
  -3   0   7 15555.1 550.941   3
  -3   0  -7 14977.6 853.674   2
  -3   0   8 4769.88 537.393   1
  -3   0   8 4153.74 293.204   3
   3   0  -8 4319.10 517.839   1
   3   0  -8 4171.61 292.991   3
   3   0  -9 5736.46 357.645   3
  -3   0   9 5071.62 555.695   1
  -3   0   9 5705.29 361.344   3
  -3   0  10 1272.98 325.975   1
  -3   0  10 1083.24 181.272   3
   3   0 -10 1221.34 171.877   3
  -3   0  11 4861.76 363.530   3
  -3   0  11 6950.60 694.556   1
  -3   0  12 9902.50 837.792   1
  -3   0  12 9558.47 537.039   3
  -3   0  13 4488.08 391.591   3
  -3   0  13 4318.96 595.383   1
  -3   0  14 402.648 165.265   3
  -3   0  14 783.713 338.258   1
  -3   0  15 189.601 151.603   3
  -3   0  15 193.565 250.486   1
  -3   0  16 2889.45 527.102   1
  -3   0  16 3222.45 416.346   3
  -3   0  17 673.844 425.954   1
  -3   0  17 807.587 281.480   3
  -3   0  18 79901.6 2715.31   1
  -3   0  18 84643.9 2144.94   3
  -3   0  19 2130.40 413.173   3
  -3   0  19 1800.88 534.661   1
  -3   0  20 2776.12 438.414   3
  -3   0  20 2849.84 572.512   1
  -3   0  21 79.2849 226.133   3
  -3   0  21 71.7505 252.856   1
  -3   0  22 5670.48 814.931   1
  -3   0  22 6064.88 688.268   3
  -3   0  23 827.860 347.761   3
  -3   0  23 581.686 340.728   1
  -3   0  24 19238.2 1534.11   1
  -3   0  24 17820.9 1246.98   3
  -3   0  25 3387.26 602.584   3
  -3   0  25 3975.31 794.705   1
  -3   0  26 7178.13 832.205   3
  -3   0  26 6760.96 1003.58   1
  -3   0  27 1369.14 517.035   1
  -3   0  27 1094.31 356.353   3
  -3   0  28 681.375 421.364   1
  -3   0  28 271.186 296.922   3
  -3   0  29-202.389 231.530   3
  -3   0  29 264.793 351.544   1
  -3   0  30 4530.89 733.705   3
  -3   0  30 5635.02 984.742   1
  -3   0  31-129.035 358.873   1
  -3   0  32 7299.82 1170.41   1
  -3   0  33-50.1261 398.250   1
  -3   0  34 7323.60 1210.50   1
  -3   1  31 3339.71 676.008   3
  -3   1  30 2828.04 709.404   1
  -3   1  30 1887.54 534.592   3
  -3   1  29 1119.55 456.130   3
  -3   1  29 721.989 458.352   1
  -3   1  28 3366.43 684.858   3
  -3   1  28 2991.13 743.232   1
  -3   1  27 10023.6 1193.66   1
  -3   1  27 11519.0 1139.85   3
   3  -1  27 7670.68 673.728   1
   3  -1  26 440.558 208.282   1
  -3   1  26-36.3189 249.988   3
  -3   1  26-118.588 360.318   1
  -3   1  25 1674.41 426.575   3
   3  -1  25 1252.12 297.444   1
  -3   1  25 1111.24 435.722   1
  -3   1  24 3783.18 708.354   1
  -3   1  24 3654.93 628.213   3
   3  -1  24 4015.62 476.288   1
  -3   1  23 4461.24 652.846   3
  -3   1  23 4259.83 701.083   1
   3  -1  23 4373.77 466.407   1
  -3   1  22 6668.50 866.843   1
  -3   1  22 8713.62 866.423   3
   3  -1  22 7454.60 575.590   1
  -3   1  21 5679.55 670.630   3
   3  -1  21 5378.18 483.843   1
  -3   1  21 6481.77 849.364   1
   3  -1  20 1639.25 286.232   1
  -3   1  20 1155.81 393.281   1
  -3   1  19 3701.98 511.907   3
  -3   1  19 3525.05 601.138   1
   3  -1  19 4085.40 390.529   1
  -3   1  18 4192.78 522.724   3
  -3   1  18 2893.75 541.164   1
   3  -1  18 4206.72 376.477   1
  -3   1  17 2987.99 536.205   1
  -3   1  17 3542.00 490.195   3
   3  -1  17 3200.10 316.690   1
   3  -1  16 5850.08 406.965   1
  -3   1  16 5439.96 558.432   3
  -3   1  16 6455.31 762.034   1
   3  -1  15 27005.5 809.484   1
  -3   1  15 28348.1 1182.27   3
  -3   1  15 26664.5 1440.69   1
   3  -1  14 3200.36 277.317   1
  -3   1  14 2364.76 357.318   3
  -3   1  14 3477.49 543.075   1
  -3   1  13 8941.34 803.168   1
  -3   1  13 10103.2 662.418   3
  -3   1  12 3149.57 367.900   3
  -3   1  12 2988.45 474.658   1
  -3   1  11 8505.36 571.283   3
  -3   1  11 9605.39 817.098   1
  -3   1  10 8510.32 552.239   3
  -3   1  10 9638.30 791.620   1
  -3   1   9 22301.8 871.823   3
  -3   1   9 23661.7 1176.68   1
  -3   1   8 1008.53 293.070   1
  -3  -1  -8 543.379 197.442   2
  -3   1   8 831.981 199.877   3
  -3  -1  -7 140.732 142.767   2
  -3   1   7 36.6492 103.391   3
  -3   1   7 289.533 227.358   1
  -3   1   6 6697.47 584.077   1
  -3  -1  -6 7034.31 594.419   2
  -3   1   6 6840.39 466.866   3
  -3   1   5 244.485 178.151   1
  -3  -1  -5 597.673 207.931   2
  -3  -1  -4 595.162 193.744   2
   3  -1   4 472.958 176.998   2
  -3   1   4 308.497 272.893   1
   3  -1   3 191193. 2108.36   1
  -3  -1  -3 196371. 2892.72   2
   3  -1   3 189356. 2533.99   2
  -3   1   3 194439. 2811.62   1
   3  -1   2 2062.69 251.700   1
  -3   1   2 2156.59 314.915   1
   3  -1   2 1606.39 250.831   2
  -3  -1  -2 1953.48 292.608   2
   3  -1   1 1969.56 263.389   1
   3  -1   1 1952.83 255.417   2
   3   1   0 51710.5 1425.69   2
   3  -1   0 53263.8 1302.58   1
   3  -1  -1 1584.84 266.781   1
   3   1   1 1441.08 271.325   2
   3   1   2 1561.20 284.143   2
   3  -1  -2 1539.87 267.729   1
  -3   1  -2 1880.57 255.896   2
   3   1   3 190040. 2776.83   2
   3  -1  -3 198437. 2438.53   3
  -3   1  -3 194545. 2548.49   2
   3  -1  -3 199460. 2814.86   1
   3   1   4 384.380 186.374   2
  -3   1  -4 61.8805 104.364   2
   3  -1  -4 262.825 162.307   1
   3  -1  -4 213.102 106.398   3
   3  -1  -5 450.006 144.312   3
  -3   1  -5 251.501 131.290   2
   3  -1  -5 297.554 157.159   1
  -3  -1   5 305.448 163.766   1
   3  -1  -6 6376.34 583.362   1
  -3  -1   6 6826.80 609.380   1
   3  -1  -6 6081.84 421.865   3
  -3   1  -6 6458.91 525.989   2
   3  -1  -7 296.608 132.434   3
  -3  -1   7 314.317 227.684   1
   3  -1  -7 238.115 174.577   1
  -3   1  -7 394.790 202.772   2
  -3  -1   8 797.771 307.363   1
   3  -1  -8 536.670 156.098   3
   3  -1  -8 663.739 190.180   1
   3  -1  -9 23705.1 1225.49   1
  -3  -1   9 24359.5 1246.32   1
   3  -1  -9 25345.9 913.928   3
  -3  -1  10 8660.58 793.415   1
   3  -1 -10 10107.4 828.059   1
   3  -1 -10 9610.19 588.225   3
   3  -1 -11 7855.04 540.620   3
  -3  -1  11 6235.41 319.114   3
   3  -1 -11 7429.33 745.721   1
  -3  -1  11 7625.20 757.199   1
   3  -1 -12 3210.31 365.588   3
   3  -1 -12 3643.14 546.562   1
  -3  -1  12 4130.86 588.646   1
  -3  -1  12 2740.05 241.524   3
   3  -1 -13 9973.36 660.033   3
   3  -1 -13 9895.83 899.429   1
  -3  -1  13 10117.5 911.442   1
  -3  -1  13 8940.28 460.067   3
   3  -1 -14 1551.98 444.343   1
  -3  -1  14 2619.87 279.436   3
  -3  -1  14 2214.08 485.880   1
  -3  -1  15 25381.7 1505.54   1
   3  -1 -15 25086.4 1500.08   1
  -3  -1  15 25942.9 915.948   3
  -3  -1  16 5835.93 481.689   3
  -3  -1  16 7119.47 858.320   1
  -3  -1  17 3284.69 394.363   3
  -3  -1  17 3068.98 626.135   1
  -3  -1  18 3882.70 658.359   1
  -3  -1  18 4191.86 466.737   3
  -3  -1  19 3084.67 580.342   1
  -3  -1  19 4124.86 484.230   3
  -3  -1  20 1819.02 360.391   3
  -3  -1  20 2062.07 546.346   1
  -3  -1  21 7357.22 952.232   1
  -3  -1  21 6812.12 670.018   3
  -3  -1  22 6543.70 919.747   1
  -3  -1  22 7103.95 708.639   3
  -3  -1  23 4520.71 595.998   3
  -3  -1  23 3412.67 687.176   1
  -3  -1  24 3152.16 690.338   1
  -3  -1  24 3847.34 548.260   3
  -3  -1  25 704.504 275.337   3
  -3  -1  25 642.872 367.551   1
  -3  -1  26 519.943 410.384   1
  -3  -1  26 428.054 291.154   3
  -3  -1  27 9685.93 1278.63   1
  -3  -1  27 8071.57 852.838   3
  -3  -1  28 1711.55 433.604   3
  -3  -1  28 2288.41 753.928   1
  -3  -1  29 716.148 458.056   1
  -3  -1  29 448.344 310.858   3
  -3  -1  30 1261.16 576.146   1
  -3  -1  31 2316.33 671.948   1
   3   1  31 2054.69 716.594   3
   3   1  32 506.582 582.489   3
  -3  -1  32 672.055 474.042   1
   3   1  33 1670.33 744.750   3
  -3  -1  33 1242.30 577.342   1
  -3  -1  34 614.816 515.088   1
   3   1  34 143.897 365.208   3
  -3   2  32 3931.71 772.928   3
  -3   2  31 1354.87 547.635   3
  -3   2  30 3232.83 670.329   3
  -3   2  29 2748.80 651.892   3
  -3   2  28 2838.29 641.513   3
  -3   2  27 506.035 407.924   3
   3  -2  27-6.29307 267.276   1
  -3   2  26 7439.68 954.469   3
   3  -2  26 5605.72 657.630   1
  -3   2  25 912.128 465.817   3
   3  -2  25-67.1645 240.070   1
  -3   2  24 11027.7 1078.67   3
   3  -2  24 9255.90 762.936   1
  -3   2  23 516.530 329.174   3
   3  -2  23 243.126 202.513   1
  -3   2  22 2780.88 537.140   3
   3  -2  22 2172.47 416.191   1
   3  -2  21 15699.8 914.735   1
  -3   2  21 15587.8 1194.26   3
  -3   2  20 210.632 242.221   3
   3  -2  20 60.1392 202.953   1
  -3   2  19 6752.97 782.280   3
  -3   2  19 5678.26 800.484   1
  -3   2  18 49444.8 1904.56   3
  -3   2  18 47408.7 2055.84   1
  -3   2  17 778.408 323.911   3
  -3   2  17 1054.21 424.127   1
  -3   2  16 898.783 296.115   3
  -3  -2 -16 916.769 164.308   1
  -3  -2 -15 14558.1 596.942   1
  -3   2  15 14668.1 949.599   3
  -3   2  15 16245.0 1137.89   1
  -3   2  14 1832.95 363.678   3
  -3   2  14 2676.32 511.172   1
  -3  -2 -14 1924.39 232.717   1
  -3  -2 -13 7009.20 424.886   1
  -3   2  13 6716.83 614.355   3
  -3   2  13 7241.82 737.902   1
  -3   2  12 6909.73 602.524   3
  -3  -2 -12 6184.24 396.569   1
  -3   2  12 6915.71 719.731   1
  -3   2  11 4985.08 494.325   3
  -3   2  10 3448.28 413.895   3
  -3   2   9 37455.4 1305.87   3
  -3  -2  -9 39183.4 1589.15   2
  -3  -2  -8 3821.94 481.683   2
  -3   2   8 3507.08 417.330   3
  -3   2   7 5098.36 460.151   3
  -3  -2  -7 4757.89 528.198   2
  -3  -2  -6 44272.6 1531.79   2
  -3   2   6 45125.9 1377.59   3
  -3   2   5 1486.57 264.003   3
  -3  -2  -5 1117.30 263.617   2
   3   2  -4 6040.34 267.587   3
  -3  -2  -4 7967.31 629.257   2
  -3  -2  -3 57922.0 1657.10   2
   3   2  -3 59427.0 936.356   3
   3  -2   3 57684.0 1300.68   2
   3  -2   2 773.945 170.598   2
   3   2  -2 713.917 140.208   3
  -3  -2  -2 703.305 221.873   2
   3  -2   1 6085.65 414.683   2
   3   2   0 9049.70 631.779   2
   3  -2  -1 8136.80 606.340   3
   3   2   1 6979.07 557.120   2
   3   2   2 423.876 175.527   2
   3  -2  -2 575.864 209.066   1
   3  -2  -2 469.231 117.864   3
  -3   2  -3 56422.9 1279.68   2
   3   2   3 60105.0 1637.81   2
   3  -2  -3 57180.8 1513.58   3
   3  -2  -3 59334.3 1626.22   1
   3  -2  -4 9842.62 627.578   3
   3   2   4 9987.60 697.395   2
  -3   2  -4 10209.2 577.432   2
   3  -2  -4 10203.7 699.407   1
   3  -2  -5 1786.19 277.724   3
  -3   2  -5 1699.24 263.733   2
   3   2   5 2036.85 339.210   2
   3  -2  -5 1659.59 313.765   1
  -3   2  -6 45986.4 1311.08   2
   3  -2  -6 44445.9 1537.16   1
   3  -2  -6 44972.3 1351.23   3
   3  -2  -7 3160.57 445.283   1
   3  -2  -7 3407.20 381.352   3
  -3   2  -7 3103.28 363.209   2
   3  -2  -8 3534.89 389.582   3
   3  -2  -8 3680.93 510.336   1
   3  -2  -9 36434.6 1527.63   1
   3  -2  -9 35282.5 1231.03   3
   3  -2 -10 4016.38 522.633   1
   3  -2 -10 3805.93 430.583   3
   3  -2 -11 5269.10 625.665   1
   3  -2 -11 4392.96 470.565   3
   3  -2 -12 7840.02 648.448   3
   3  -2 -12 7105.24 752.068   1
  -3  -2  13 4402.03 288.044   3
   3  -2 -13 5879.50 582.490   3
   3  -2 -13 6257.77 710.030   1
  -3  -2  14 1310.24 193.098   3
   3  -2 -14 2248.00 466.096   1
   3  -2 -14 1884.03 370.214   3
  -3  -2  14 1985.51 468.291   1
  -3  -2  15 15437.8 649.280   3
  -3  -2  15 17372.7 1309.54   1
   3  -2 -15 16752.9 1004.81   3
  -3  -2  16 1084.83 424.674   1
  -3  -2  16 1028.20 202.243   3
  -3  -2  17 737.077 205.656   3
  -3  -2  17 1006.33 438.485   1
  -3  -2  18 47120.6 1374.24   3
  -3  -2  18 46052.8 2258.11   1
  -3  -2  19 5990.86 927.675   1
  -3  -2  19 5027.47 487.721   3
  -3  -2  20 318.286 198.752   3
  -3  -2  20 124.327 282.480   1
  -3  -2  21 15417.2 926.347   3
  -3  -2  21 14476.3 1363.77   1
  -3  -2  22 4829.40 555.879   3
  -3  -2  22 4153.84 773.582   1
  -3  -2  23 463.285 499.825   1
  -3  -2  23 406.057 258.620   3
  -3  -2  24 10850.8 863.807   3
  -3  -2  24 9862.50 1233.61   1
  -3  -2  25 387.225 245.246   3
  -3  -2  25 96.7445 309.232   1
   3   2  26 6384.04 1038.72   3
  -3  -2  26 6686.46 1031.52   1
  -3  -2  26 7247.89 750.281   3
  -3  -2  27-44.1076 359.298   1
   3   2  27 156.608 382.036   3
  -3  -2  27 609.294 281.345   3
  -3  -2  28 1271.00 366.323   3
   3   2  28 2250.01 658.347   3
  -3  -2  28 1442.09 521.066   1
  -3  -2  29 1124.42 339.909   3
   3   2  29 3764.05 877.086   3
  -3  -2  29 2682.38 779.686   1
   3   2  30 3794.71 890.791   3
  -3  -2  30 3802.26 892.670   1
  -3  -2  31 276.798 329.974   1
   3   2  31 383.086 413.213   3
  -3  -2  32 4185.59 925.994   1
   3   2  32 3375.17 865.926   3
  -3  -2  33 2210.61 770.007   1
   3   2  33 3426.80 903.422   3
  -3   3  33 911.659 502.201   3
  -3   3  32 1399.63 526.215   3
  -3   3  31-6.96577 302.133   3
  -3   3  30 4520.57 810.863   3
  -3   3  29 724.370 326.723   3
   3  -3  28 1898.25 503.487   1
  -3   3  28 4254.30 804.996   3
  -3   3  27 629.911 431.902   3
   3  -3  27 882.114 300.580   1
  -3   3  26 1129.16 420.233   3
   3  -3  26 1258.14 379.639   1
   3  -3  25 540.505 304.529   1
  -3   3  25 285.906 383.065   3
  -3   3  24 25926.6 1731.15   3
   3  -3  24 22862.7 1311.34   1
  -3   3  23 2519.74 560.973   3
  -3   3  22 1940.81 477.968   3
  -3  -3 -21 2487.93 365.652   1
  -3   3  21 2458.74 557.556   3
  -3   3  20 4325.40 650.568   3
  -3  -3 -20 4479.74 472.185   1
  -3  -3 -19 9560.02 651.890   1
  -3   3  19 8063.59 852.625   3
  -3  -3 -18 2065.24 318.073   1
  -3   3  18 1947.78 455.916   3
  -3  -3 -17 5272.62 476.498   1
  -3   3  17 5547.81 687.953   3
  -3   3  16 4700.83 612.248   3
  -3  -3 -16 6178.85 511.446   1
  -3  -3 -15 923.088 221.714   1
  -3   3  15 1304.90 373.370   3
  -3   3  14 1772.71 378.135   3
  -3   3  13 8686.67 763.175   3
  -3   3  12 87245.4 2311.83   3
  -3   3  11 4488.61 536.433   3
  -3  -3 -10 1209.40 356.030   2
  -3   3  10 503.453 198.848   3
  -3  -3  -9 4578.33 569.624   2
  -3   3   9 4089.98 509.127   3
  -3  -3  -8 4661.35 552.426   2
  -3   3   8 5020.21 543.832   3
  -3  -3  -7 1865.58 364.653   2
  -3   3   7 1849.52 347.661   3
  -3  -3  -6 38090.2 1484.08   2
   3   3  -6 36313.8 715.059   3
  -3   3   6 40188.4 1449.07   3
  -3  -3  -5 4265.93 491.341   2
   3   3  -5 4233.62 267.991   3
  -3   3   5 4345.40 498.749   3
   3   3  -4 1896.12 201.487   3
  -3   3   4 2566.37 375.594   3
  -3  -3  -4 1543.50 308.005   2
   3   3  -3 72139.2 1283.78   3
  -3  -3  -3 73753.6 1959.76   2
   3  -3   2 586.341 134.147   2
   3   3  -2 727.989 159.412   3
  -3  -3  -2 352.491 175.552   2
   3   3  -1 3238.12 320.450   3
   3  -3   1 3373.51 277.898   2
   3   3  -1 4200.86 457.096   2
   3   3   0 64156.2 1433.01   3
   3  -3   0 58563.7 1798.56   3
   3   3   0 60238.9 1677.68   2
   3  -3   0 63105.0 1211.91   2
   3   3   1 3348.63 372.366   3
   3  -3  -1 3476.64 441.005   3
   3   3   1 2948.20 374.646   2
   3  -3  -2 796.906 202.188   3
   3   3   2 380.167 157.806   3
   3   3   2 459.912 196.675   2
   3   3   3 76391.7 1913.61   2
   3   3   3 78758.5 1812.54   3
   3  -3  -3 74694.4 1959.08   3
   3   3   4 2879.08 406.812   2
   3   3   4 3139.04 414.091   3
   3  -3  -4 2828.46 400.616   3
  -3   3  -4 2234.89 254.574   2
   3   3   5 4851.56 502.483   3
  -3   3  -5 5108.27 400.157   2
   3  -3  -5 4919.70 513.941   3
   3   3   5 5584.35 546.431   2
  -3  -3   6 33145.4 704.718   3
   3   3   6 37857.6 1401.80   3
   3  -3  -6 37704.9 1510.48   1
  -3   3  -6 39138.5 1155.26   2
   3  -3  -6 40383.8 1456.22   3
   3  -3  -7 1736.48 314.902   3
  -3  -3   7 1487.54 143.091   3
  -3   3  -7 1878.25 286.005   2
   3   3   7 1897.88 395.164   3
   3  -3  -7 1912.31 370.048   1
   3   3   8 4865.71 554.182   3
   3  -3  -8 4876.29 519.831   3
   3  -3  -8 4848.16 593.845   1
   3   3   9 6154.12 629.886   3
   3  -3  -9 4569.69 506.245   3
   3  -3  -9 6054.65 654.999   1
   3   3  10 821.610 351.181   3
   3  -3 -10 611.385 198.271   3
   3  -3 -10 658.129 283.621   1
   3   3  11 5381.83 688.019   3
   3  -3 -11 4947.78 626.411   1
   3  -3 -11 4793.92 546.446   3
   3  -3 -12 75523.1 2464.39   1
   3   3  12 80891.8 2463.21   3
   3  -3 -12 79807.0 2238.72   3
   3  -3 -13 7466.91 722.391   3
  -3  -3  13 5831.62 340.359   3
   3   3  13 8016.61 841.408   3
   3  -3 -14 1958.74 395.575   3
   3   3  14 1313.21 402.098   3
   3   3  15 1509.58 432.498   3
   3  -3 -15 1452.74 346.503   3
   3  -3 -16 5230.87 662.695   3
   3   3  16 5979.02 768.289   3
   3  -3 -17 4441.30 625.574   3
   3   3  17 4065.33 673.363   3
   3   3  18 3368.21 711.707   3
   3  -3 -18 2245.28 479.517   3
   3   3  19 7838.41 934.367   3
  -3  -3  19 9361.37 1122.19   1
  -3  -3  20 5103.52 866.278   1
  -3  -3  20 4462.43 454.897   3
   3   3  20 5006.41 826.105   3
  -3  -3  21 2493.78 638.133   1
  -3  -3  21 2382.13 356.970   3
   3   3  21 2124.51 550.483   3
  -3  -3  22 1981.62 368.846   3
   3   3  22 1884.00 511.612   3
  -3  -3  22 1909.60 559.625   1
  -3  -3  23 2900.62 746.260   1
   3   3  23 2573.54 644.709   3
  -3  -3  23 1722.87 346.238   3
  -3  -3  24 20155.3 1102.64   3
   3   3  24 22664.2 1769.04   3
  -3  -3  24 20992.5 1780.88   1
  -3  -3  25 115.222 470.361   1
  -3  -3  25 433.054 235.791   3
   3   3  25 589.943 430.755   3
  -3  -3  26 1578.31 332.794   3
  -3  -3  26 1116.32 549.531   1
   3   3  26 1067.20 545.474   3
  -3  -3  27 1467.52 381.761   3
   3   3  27 1528.40 590.876   3
  -3  -3  27 1360.84 608.402   1
   3   3  28 4558.25 907.412   3
  -3  -3  28 3979.56 849.386   1
  -3  -3  29-183.642 343.820   1
   3   3  29 243.671 354.059   3
   3   3  30 5528.12 1047.94   3
  -3  -3  30 2782.53 812.863   1
   3   3  31 242.133 349.189   3
  -3  -3  31-385.245 465.980   1
  -3  -3  32 453.519 425.712   1
   3   3  32 1094.14 602.909   3
   3   3  33 770.573 353.802   3
  -3  -3  33 36.0224 387.933   1
  -3   4  32 2850.89 710.802   3
  -3   4  31 1776.64 618.201   3
  -3   4  30 1286.19 553.468   3
  -3   4  29 3599.55 792.476   3
  -3   4  28 1140.08 494.066   3
   3  -4  28 277.985 280.728   1
   3  -4  27 1075.91 398.608   1
  -3   4  27 850.434 388.836   3
  -3   4  26 1344.64 567.703   3
  -3   4  25 3313.18 686.099   3
  -3   4  24 735.181 520.142   3
  -3   4  23 4271.18 765.287   3
  -3   4  22 4075.82 769.935   3
  -3  -4 -22 3412.23 489.503   1
  -3   4  21 36496.3 1999.81   3
  -3  -4 -21 32247.6 1422.94   1
  -3   4  20 859.977 419.352   3
  -3  -4 -20 810.428 293.631   1
  -3  -4 -19 272.593 217.452   1
  -3   4  19-292.264 257.458   3
  -3   4  18 6806.59 822.951   3
  -3  -4 -18 5925.21 594.992   1
  -3  -4 -17 2110.74 391.142   1
  -3   4  17 2027.37 462.804   3
  -3   4  16 3652.38 569.045   3
  -3   4  15 6985.69 754.288   3
  -3   4  14 1679.94 397.093   3
  -3   4  13 2575.01 429.855   3
  -3   4  12 10202.8 862.246   3
  -3  -4 -11 576.765 343.372   2
  -3   4  11-23.6885 169.000   3
  -3  -4 -10 1373.29 361.646   2
  -3   4  10 583.820 254.711   3
  -3   4   9 57266.7 1935.83   3
  -3  -4  -9 61908.9 2124.13   2
  -3  -4  -8 8502.59 770.308   2
  -3   4   8 7953.70 729.243   3
  -3  -4  -7 14667.4 968.323   2
  -3   4   7 16283.0 1025.80   3
  -3   4   6 1198.76 315.420   3
  -3  -4  -6 1163.19 306.021   2
   3   4  -6 1411.55 212.683   3
  -3  -4  -5 3150.40 431.402   2
  -3   4   5 2814.21 440.922   3
   3   4  -5 3540.79 317.434   3
  -3  -4  -4 7662.26 684.463   2
  -3   4   4 8554.39 754.747   3
   3   4  -4 8139.06 501.749   3
  -3  -4  -3 33804.6 1424.45   2
  -3   4   3 32614.0 1451.25   3
   3   4  -3 33560.1 1052.96   3
   3   4  -2 1677.55 268.002   3
   3  -4   2 1213.51 326.814   3
   3   4  -2 1940.76 359.271   2
   3   4  -1 2461.95 324.795   3
   3   4  -1 1999.04 347.194   2
   3  -4   1 3199.52 485.028   3
   3  -4   1 2005.38 188.079   2
   3  -4   0 82.3090 87.1342   2
   3   4   0 46.6607 122.476   3
  -3  -4   0 195.162 140.333   3
   3   4   0-16.8661 176.420   2
   3  -4   0 53.7772 171.242   3
   3   4   1 2829.58 378.697   2
   3   4   1 2183.16 323.714   3
  -3  -4   1 2601.21 348.662   3
   3  -4  -1 2491.20 415.803   3
   3   4   2 2274.41 362.157   2
   3   4   2 1419.47 279.070   3
  -3  -4   2 2223.84 328.458   3
   3  -4  -2 1602.68 362.020   3
   3   4   3 35743.3 1336.99   3
   3   4   3 37187.7 1394.21   2
  -3  -4   3 35562.0 1107.62   3
   3  -4  -3 36211.9 1523.13   3
   3   4   4 7426.17 643.232   3
  -3  -4   4 8077.05 507.587   3
  -3   4  -4 7699.29 405.697   2
   3   4   4 9352.01 710.963   2
   3  -4  -4 6857.86 659.023   3
   3   4   5 3680.74 483.856   3
  -3   4  -5 3964.07 323.715   2
  -3  -4   5 3535.95 326.286   3
   3  -4  -5 3745.01 489.535   3
  -3   4  -6 892.458 182.243   2
   3   4   6 721.466 302.472   3
  -3  -4   6 1373.16 204.907   3
   3  -4  -6 1255.07 306.584   3
   3   4   7 15587.5 991.671   3
   3  -4  -7 15605.0 1021.37   3
  -3  -4   7 14216.5 589.228   3
  -3   4  -7 13845.8 692.669   2
   3   4   8 7487.53 739.725   3
   3  -4  -8 6486.19 651.559   3
  -3  -4   8 6738.05 397.960   3
   3   4   9 58722.1 1988.97   3
   3  -4  -9 55810.8 1936.95   3
   3  -4  -9 56458.4 2116.07   1
  -3  -4  10 772.352 141.089   3
   3  -4 -10 1148.98 315.116   3
   3   4  10 1602.05 433.437   3
   3  -4 -10 1463.67 376.800   1
   3  -4 -11 114.305 170.874   3
   3   4  11 177.176 274.066   3
  -3  -4  11 89.5363 74.8376   3
   3   4  12 10240.6 916.554   3
  -3  -4  12 8644.57 455.921   3
   3  -4 -12 9255.58 833.218   3
   3  -4 -13 1511.54 373.847   3
   3   4  13 2452.01 475.868   3
  -3  -4  13 1416.35 204.506   3
   3  -4 -14 1887.35 408.324   3
   3   4  14 1763.36 453.534   3
  -3  -4  14 1723.40 231.945   3
   3   4  15 8699.54 896.978   3
  -3  -4  15 7462.75 502.896   3
  -3  -4  16 3363.38 379.499   3
   3   4  16 2606.03 508.704   3
   3   4  17 2151.21 512.866   3
   3   4  18 5809.81 824.969   3
   3   4  19 416.897 389.940   3
   3   4  20 1383.08 509.909   3
   3   4  21 38096.1 2145.86   3
   3   4  22 3111.69 674.743   3
  -3  -4  22 3660.82 792.672   1
   3   4  23 4748.37 858.534   3
  -3  -4  23 3158.95 795.180   1
   3   4  24 1025.93 506.113   3
  -3  -4  24-167.064 376.835   1
  -3  -4  25 2194.47 653.695   1
   3   4  25 2764.73 680.289   3
  -3  -4  25 2373.29 410.657   3
  -3  -4  26 585.594 407.584   1
   3   4  26 561.432 460.744   3
  -3  -4  27 15.9841 529.958   1
   3   4  27 332.373 488.575   3
  -3  -4  28 613.159 477.478   1
   3   4  28 509.516 477.350   3
  -3  -4  29 3577.93 865.132   1
   3   4  29 3940.68 888.066   3
   3   4  30 2360.41 766.022   3
  -3  -4  30 1304.94 590.422   1
   3   4  31 2076.26 693.245   3
  -3  -4  31 819.849 578.455   1
   3   4  32 2870.91 788.988   3
  -3  -4  32 3203.70 923.567   1
  -3   5  31 246.780 490.340   3
  -3   5  30 2690.99 704.305   3
  -3   5  29 3032.45 806.673   3
  -3   5  28 1096.90 502.292   3
  -3   5  27 5661.08 944.798   3
  -3   5  26 3042.41 736.740   3
  -3   5  25 4256.94 847.413   3
  -3   5  24 11315.7 1238.94   3
  -3   5  23 743.289 389.711   3
  -3   5  22 406.888 392.490   3
  -3  -5 -21 665.458 279.265   1
  -3   5  21 271.403 272.493   3
  -3  -5 -20 1312.21 359.518   1
  -3   5  20 1470.67 499.648   3
  -3  -5 -19 188.182 216.785   1
  -3   5  19 471.860 302.557   3
  -3   5  18 958.778 381.803   3
  -3   5  17 3932.62 683.875   3
  -3   5  16 3454.93 605.540   3
  -3   5  15 14118.4 1135.94   3
  -3   5  14 3392.05 617.492   3
  -3   5  13 2970.23 552.098   3
  -3   5  12 33825.3 1683.53   3
  -3   5  11 2599.63 505.954   3
  -3  -5 -10 5564.30 691.082   2
  -3   5  10 5177.34 684.632   3
  -3  -5  -9 19989.5 1272.70   2
  -3   5   9 19977.3 1257.91   3
  -3   5   8 2435.05 484.830   3
  -3  -5  -8 2560.12 463.582   2
  -3  -5  -7 1381.35 335.296   2
   3   5  -7 1195.35 234.702   3
  -3   5   7 771.397 313.000   3
  -3  -5  -6 380.097 178.858   2
   3   5  -6 522.726 170.258   3
  -3   5   6 91.9251 204.902   3
   3  -5   5 3076.47 544.169   3
   3   5  -5 3600.42 385.019   3
  -3   5   5 3478.08 543.807   3
  -3  -5  -5 3292.55 505.473   2
   3  -5   4 286.313 187.310   3
   3   5  -4 350.812 173.194   3
  -3   5   4-163.687 261.549   3
  -3  -5  -4 64.2504 172.167   2
  -3   5   3 958.513 270.218   3
   3   5  -3 258.086 192.822   2
   3  -5   3 565.362 270.268   3
  -3  -5  -3 742.164 271.215   3
   3   5  -3 909.509 233.409   3
  -3  -5  -2 5416.11 581.257   3
  -3   5   2 4573.62 599.933   3
   3  -5   2 3942.81 585.344   3
   3   5  -2 4347.33 496.972   2
   3   5  -2 3551.06 421.040   3
  -3  -5  -1 5213.75 578.865   3
   3  -5   1 4330.63 613.045   3
   3   5  -1 4373.18 476.529   3
   3   5  -1 5188.03 549.858   2
  -3  -5   0 149655. 2833.19   3
   3  -5   0 135870. 3247.07   3
   3   5   0 135488. 2721.93   2
   3   5   0 150115. 2754.48   3
   3   5   1 4260.86 478.357   2
   3  -5  -1 4617.68 613.613   3
   3   5   1 4784.67 531.818   3
  -3  -5   1 5166.41 535.738   3
  -3  -5   2 3951.48 446.106   3
   3   5   2 4245.06 504.480   3
   3   5   2 3787.02 480.346   2
   3  -5  -2 4207.69 599.707   3
   3   5   3 2073.21 382.812   3
   3   5   3 2709.67 400.839   2
  -3  -5   3 2292.11 337.424   3
   3  -5  -3 2144.39 439.193   3
   3   5   4-100.735 223.596   3
  -3  -5   4 363.079 166.475   3
   3   5   4-190.482 195.901   2
   3  -5  -4 96.2001 167.873   3
   3   5   5 3365.33 501.849   3
  -3   5  -5 3258.86 251.445   2
   3  -5  -5 3754.84 562.427   3
  -3  -5   5 4035.79 429.069   3
  -3  -5   6 201.274 125.735   3
   3  -5  -6-71.1896 217.707   3
  -3   5  -6 321.484 110.863   2
   3  -5  -7 494.552 221.469   3
  -3  -5   7 968.383 222.553   3
  -3   5  -7 1019.51 197.576   2
   3   5   7 1450.91 369.526   3
  -3  -5   8 2240.48 304.935   3
   3   5   8 1727.79 413.161   3
  -3   5  -8 2192.26 288.935   2
   3  -5  -8 2276.15 441.590   3
   3   5   9 19463.1 1232.92   3
   3  -5  -9 20062.9 1277.24   3
  -3  -5   9 21055.2 873.146   3
   3   5  10 4746.75 655.684   3
  -3  -5  10 3769.67 375.387   3
  -3  -5  11 1912.21 277.920   3
   3   5  11 3218.79 561.763   3
   3   5  12 28888.7 1605.68   3
  -3  -5  12 26731.7 978.369   3
   3   5  13 3600.73 654.205   3
  -3  -5  13 2743.06 334.447   3
   3   5  14 2456.79 524.533   3
  -3  -5  14 2070.14 287.558   3
   3   5  15 15984.6 1250.88   3
  -3  -5  15 11709.3 695.197   3
  -3  -5  16 3870.56 433.089   3
   3   5  16 5064.95 769.863   3
   3   5  17 3398.50 618.924   3
  -3  -5  17 3167.63 417.878   3
   3   5  18 1450.44 488.852   3
  -3  -5  18 1556.91 321.901   3
   3   5  19 621.055 430.663   3
  -3  -5  19 396.539 170.087   3
   3   5  20 2067.96 536.174   3
  -3  -5  20 1561.11 356.705   3
   3   5  21 1310.64 471.714   3
  -3  -5  21 1156.04 360.872   3
   3   5  22 311.908 357.837   3
   3   5  23 602.549 426.510   3
   3   5  24 11132.5 1281.46   3
   3   5  25 4259.57 889.442   3
  -3  -5  25 5326.88 1016.47   1
  -3  -5  26 3177.95 889.287   1
   3   5  26 2489.31 683.306   3
  -3  -5  27 5701.47 1111.03   1
   3   5  27 6192.17 1030.90   3
  -3  -5  28 904.365 525.574   1
   3   5  28 1645.77 638.376   3
   3   5  29 1943.44 676.316   3
  -3  -5  29 2108.59 738.885   1
  -3  -5  30 2298.71 778.766   1
   3   5  30 3148.32 826.390   3
  -3  -5  31 476.624 432.918   1
   3   5  31 13.5470 319.036   3
  -3   6  30 2459.92 736.595   3
  -3   6  29 1744.19 614.479   3
  -3   6  28 100.679 390.735   3
  -3   6  27 2423.16 702.819   3
  -3   6  26 863.987 356.641   3
  -3   6  25 451.138 441.470   3
  -3   6  24 1120.47 508.072   3
  -3   6  23 1208.70 445.164   3
  -3   6  22 1568.81 514.646   3
  -3   6  21 9712.95 1128.53   3
  -3  -6 -20 348.974 250.078   1
  -3   6  20 422.180 399.690   3
  -3   6  19 1436.22 500.139   3
  -3   6  18 2735.93 616.294   3
  -3   6  17 2592.70 620.525   3
  -3   6  16 4311.25 723.449   3
  -3   6  15 11882.3 1141.70   3
  -3   6  14 2302.16 516.579   3
  -3   6  13 5564.20 739.373   3
  -3   6  12 7274.66 839.620   3
  -3   6  11 5156.22 719.747   3
  -3   6  10 1960.69 467.403   3
  -3   6   9 11049.7 993.707   3
  -3  -6  -8 2479.28 426.868   2
  -3   6   8 2911.67 586.877   3
  -3  -6  -7 488.440 218.309   2
   3   6  -7 302.490 170.409   3
  -3   6   7 270.161 275.131   3
  -3   6   6 62164.3 2313.78   3
  -3  -6  -6 58815.8 2053.30   2
   3   6  -6 59926.7 1721.35   3
  -3  -6  -5 4655.36 611.571   3
   3   6  -5 4091.05 458.839   3
  -3  -6  -5 4036.05 552.533   2
  -3   6   5 5362.47 705.972   3
  -3  -6  -4 3053.78 510.484   3
   3   6  -4 3903.09 515.360   2
   3   6  -4 2923.11 412.186   3
  -3   6   4 2944.67 522.547   3
  -3  -6  -4 3041.08 479.980   2
  -3  -6  -3 26701.9 1393.01   3
  -3   6   3 25526.8 1484.15   3
   3   6  -3 27220.5 1239.93   3
   3   6  -3 27930.9 1335.53   2
  -3  -6  -2 790.280 264.504   3
  -3   6   2 440.960 227.559   3
   3   6  -2 671.709 260.213   3
   3   6  -2 459.393 227.909   2
   3   6  -1-8.17688 191.426   2
  -3  -6  -1 293.122 224.422   3
   3   6  -1 383.884 233.089   3
   3   6   0 187.312 178.141   2
  -3  -6   0 400.847 213.183   3
   3   6   0 547.859 267.893   3
   3   6   1-179.336 216.884   3
   3   6   1-11.1098 171.654   2
  -3  -6   1 198.326 220.680   3
   3   6   2 348.993 232.662   3
   3   6   2 996.421 285.922   2
  -3  -6   2 820.848 264.167   3
  -3  -6   3 24045.4 1205.06   3
   3   6   3 26863.2 1376.71   3
   3   6   3 27462.9 1327.43   2
   3   6   4 3491.46 557.605   3
  -3  -6   4 3177.48 443.498   3
   3   6   5 5150.85 656.970   3
  -3  -6   5 4446.11 512.642   3
  -3  -6   6 60224.5 1807.11   3
   3   6   6 59066.4 2134.47   3
  -3  -6   7 1009.68 290.444   3
   3   6   7 906.552 377.752   3
  -3   6  -7 528.443 127.466   2
  -3  -6   8 2785.93 399.163   3
   3   6   8 3015.96 572.982   3
  -3   6  -8 2838.49 298.416   2
  -3  -6   9 12249.7 794.624   3
   3   6   9 12029.4 1029.45   3
  -3  -6  10 2548.79 367.863   3
   3   6  10 3020.41 568.166   3
  -3  -6  11 4098.41 465.988   3
   3   6  11 5175.82 724.818   3
   3   6  12 6631.04 810.541   3
  -3  -6  12 5728.35 541.736   3
  -3  -6  13 5710.73 545.661   3
   3   6  13 6875.37 858.202   3
   3   6  14 3265.49 643.561   3
  -3  -6  14 2347.47 361.958   3
   3   6  15 14734.1 1281.75   3
  -3  -6  15 13641.3 861.347   3
   3   6  16 5554.01 826.525   3
  -3  -6  16 4451.00 518.346   3
  -3  -6  17 1734.82 370.541   3
   3   6  17 3170.98 644.606   3
   3   6  18 1104.38 421.225   3
  -3  -6  18 1281.50 304.037   3
   3   6  19 938.906 420.023   3
  -3  -6  19 717.149 241.660   3
   3   6  20 141.872 295.050   3
   3   6  21 8513.44 1105.33   3
   3   6  22 1042.97 472.746   3
   3   6  23 2333.10 677.125   3
   3   6  24 1280.09 508.259   3
   3   6  25-59.0118 343.541   3
   3   6  26 1731.48 614.125   3
   3   6  27 2022.03 724.228   3
   3   6  28 33.8051 434.880   3
  -3  -6  28 970.000 538.682   1
  -3  -6  29 3730.30 959.409   1
   3   6  29 2066.96 657.157   3
  -3  -6  30 1637.62 701.954   1
   3   6  30 1842.55 672.425   3
  -3   7  29 358.351 391.378   3
  -3   7  28 968.216 532.540   3
  -3   7  27 13506.9 1534.69   3
  -3   7  26 4988.57 991.687   3
  -3   7  25 2884.95 792.220   3
  -3   7  24 3750.84 816.288   3
  -3   7  23 3463.06 845.464   3
  -3   7  22 1106.89 440.978   3
  -3   7  21 5223.84 927.418   3
  -3   7  20 678.265 445.837   3
  -3   7  19 359.490 346.555   3
  -3   7  18 1808.68 571.589   3
  -3   7  17 2374.45 639.431   3
  -3   7  16 830.643 441.092   3
  -3   7  15 34783.9 2035.22   3
  -3   7  14 2820.77 686.487   3
  -3   7  13 1956.09 557.832   3
  -3   7  12 1246.84 414.611   3
  -3   7  11-34.5830 329.243   3
  -3   7  10 4472.43 707.428   3
  -3   7   9 19969.8 1421.06   3
  -3   7   8 2772.39 545.196   3
   3   7  -7 256.376 193.033   3
  -3   7   7 164.220 267.570   3
  -3   7   6 2331.94 624.416   3
   3   7  -6 1816.25 369.263   3
  -3  -7  -6 1562.17 374.298   2
   3   7  -5 385.883 235.955   3
  -3  -7  -5 38.7789 152.216   2
   3   7  -5 50.2416 183.240   2
  -3   7   5 300.740 368.618   3
  -3   7   4 611.975 278.493   3
   3   7  -4 873.349 283.302   3
   3   7  -4 140.194 207.813   2
  -3   7   3 15920.1 1243.27   3
   3   7  -3 15495.8 1020.46   2
   3   7  -3 15434.6 1031.10   3
  -3  -7  -2 12503.7 1034.43   3
  -3   7   2 11848.3 1073.10   3
   3   7  -2 11413.1 922.485   3
   3   7  -2 12213.3 896.597   2
   3   7  -1 218.682 220.143   2
  -3  -7  -1 195.982 221.510   3
   3   7  -1-250.440 270.369   3
  -3  -7   0 21555.9 1317.46   3
   3   7   0 23780.9 1363.12   3
   3   7   0 22175.2 1199.57   2
   3   7   1 177.549 235.938   2
  -3  -7   1 200.606 179.457   3
   3   7   1 74.9567 193.543   3
  -3  -7   2 12639.6 984.860   3
   3   7   2 13247.4 943.144   2
   3   7   2 13165.8 1037.93   3
  -3  -7   3 13226.1 1007.85   3
   3   7   3 14370.7 1099.93   3
  -3  -7   4 416.866 232.609   3
   3   7   4 831.202 354.946   3
   3   7   5 256.059 258.121   3
  -3  -7   5 285.394 191.406   3
   3   7   6 2046.49 474.738   3
  -3  -7   6 1487.98 359.524   3
  -3  -7   7 538.538 256.952   3
   3   7   7 364.812 309.421   3
   3   7   8 3284.23 590.748   3
  -3  -7   8 2408.77 440.915   3
  -3   7  -8 2117.03 198.488   2
   3   7   9 18423.0 1342.08   3
  -3   7  -9 18387.8 711.605   2
  -3  -7   9 19574.2 1145.23   3
  -3  -7  10 4474.40 567.821   3
  -3   7 -10 4242.66 382.381   2
   3   7  10 5941.67 833.848   3
   3   7  11 80.2761 277.750   3
  -3  -7  11-60.0965 137.206   3
  -3  -7  12 1254.43 343.233   3
   3   7  12 1373.79 412.804   3
  -3  -7  13 1147.52 293.201   3
   3   7  13 1404.02 464.410   3
  -3  -7  14 2281.79 420.786   3
   3   7  14 2661.88 615.313   3
  -3  -7  15 27499.0 1385.02   3
   3   7  15 30694.0 1900.03   3
   3   7  16 515.528 492.629   3
  -3  -7  16 417.478 261.329   3
   3   7  17 3573.28 714.974   3
  -3  -7  17 2446.62 438.098   3
   3   7  18 526.140 437.436   3
   3   7  19 1008.90 426.849   3
   3   7  20 113.635 412.731   3
   3   7  21 5514.27 921.389   3
   3   7  22 2401.16 679.462   3
   3   7  23 2377.54 610.602   3
   3   7  24 6117.77 1022.07   3
   3   7  25 2997.58 643.847   3
   3   7  26 2448.59 728.393   3
   3   7  27 13701.7 1538.77   3
   3   7  28 403.456 474.041   3
   3   7  29-738.069 425.802   3
  -3   8  27 1200.64 634.414   3
  -3   8  26 676.633 460.758   3
  -3   8  25 47.9303 448.857   3
  -3   8  24-62.6476 461.120   3
  -3   8  23 1289.09 547.112   3
  -3   8  22 2537.63 752.445   3
  -3   8  21 327.665 408.766   3
  -3   8  20 1889.57 624.817   3
  -3   8  19 7390.98 1071.78   3
  -3   8  18 11695.6 1313.53   3
  -3   8  17 212.843 349.764   3
  -3   8  16 805.547 412.163   3
  -3   8  15 878.438 405.749   3
  -3   8  14 1934.63 563.733   3
  -3   8  13 3078.52 707.218   3
  -3   8  12 11808.7 1220.82   3
  -3   8  11 6383.61 896.242   3
  -3   8  10 1369.05 498.433   3
  -3   8   9 181.753 282.958   3
  -3   8   8 183.603 293.308   3
   3   8  -7 1132.17 372.045   3
  -3   8   7 709.003 393.176   3
   3   8  -7 1252.22 365.647   2
  -3   8   6 49608.7 2363.09   3
   3   8  -6 52974.0 2070.94   2
   3   8  -6 48898.3 1934.11   3
   3   8  -5 6045.67 687.212   2
   3   8  -5 5458.36 676.028   3
  -3   8   5 5022.73 776.595   3
  -3   8   4 534.049 295.655   3
   3   8  -4 1030.00 307.475   3
   3   8  -4 937.450 283.158   2
   3   8  -3 1440.08 331.521   2
   3   8  -3 1800.03 409.101   3
  -3   8   3 1472.21 457.421   3
   3   8  -2 1019.76 295.226   2
  -3   8   2 1061.50 408.115   3
   3   8  -2 944.546 346.861   3
   3   8  -1 1613.04 362.677   2
   3   8  -1 1922.61 468.171   3
   3   8   0 6584.94 812.571   3
   3   8   0 6465.28 689.051   2
   3   8   1 1876.72 402.914   2
   3   8   1 2672.81 563.808   3
   3   8   2 1811.32 472.309   3
  -3  -8   3 1515.53 363.552   3
   3   8   3 2218.83 493.772   3
   3  -8  -4 628.413 106.003   2
  -3  -8   4 1315.55 403.569   3
   3   8   4 1679.91 472.533   3
   3   8   5 6671.23 831.467   3
  -3  -8   5 6651.45 793.741   3
   3   8   6 54506.6 2337.67   3
  -3  -8   6 50209.4 2088.89   3
   3   8   7 2053.23 570.962   3
  -3  -8   7 1811.75 447.254   3
   3   8   8 1153.79 400.824   3
  -3  -8   8 850.537 303.863   3
   3   8   9 848.070 376.200   3
  -3  -8   9 642.244 300.766   3
  -3   8 -10 681.732 132.756   2
  -3  -8  10 654.862 325.198   3
   3   8  10 821.295 376.208   3
  -3  -8  11 6395.24 752.319   3
  -3   8 -11 5117.65 407.637   2
   3   8  11 7202.09 921.824   3
  -3  -8  12 12956.5 1036.09   3
   3   8  12 15441.2 1356.47   3
  -3  -8  13 3499.97 548.452   3
   3   8  13 3959.71 750.111   3
  -3  -8  14 2043.53 457.791   3
   3   8  14 2402.91 587.010   3
  -3  -8  15 1339.63 384.619   3
   3   8  15 885.491 413.200   3
   3   8  16 428.485 358.019   3
   3   8  17 415.282 345.645   3
   3   8  18 15414.4 1455.56   3
   3   8  19 8168.84 1111.99   3
   3   8  20 1957.33 597.585   3
   3   8  21 141.759 381.608   3
   3   8  22 1411.83 544.089   3
   3   8  23 1436.83 508.449   3
   3   8  24 593.756 407.682   3
   3   8  25 673.622 557.161   3
   3   8  26-62.7210 471.509   3
   3   8  27 459.215 397.841   3
  -3   9  25 193.484 410.227   3
  -3   9  24 343.862 378.639   3
  -3   9  23 3181.80 916.230   3
  -3   9  22 1647.95 658.141   3
  -3   9  21 2208.48 638.121   3
  -3   9  20-326.786 409.733   3
  -3   9  19-147.480 420.163   3
  -3   9  18 5137.84 959.300   3
  -3   9  17 341.051 346.981   3
  -3   9  16 1140.34 474.702   3
  -3   9  15 8860.57 1202.39   3
  -3   9  14 1837.03 580.185   3
  -3   9  13 6.97370 314.070   3
  -3   9  12 7025.84 1026.04   3
  -3   9  11 871.818 464.855   3
  -3   9  10 3436.29 832.094   3
  -3   9   9 10113.6 1156.39   3
  -3   9   8 890.816 414.680   3
   3   9  -8 364.447 287.651   2
  -3   9   7 1556.79 492.169   3
   3   9  -7 1383.27 359.731   2
   3   9  -6 3948.69 607.681   3
  -3   9   6 2886.70 670.489   3
   3   9  -6 3716.24 550.270   2
   3   9  -5 3331.20 573.226   3
  -3   9   5 4135.88 802.634   3
   3   9  -5 3303.44 541.025   2
   3   9  -4 539.494 287.607   2
  -3   9   4 767.894 460.699   3
   3   9  -4 917.920 329.210   3
   3   9  -3 2463.86 432.865   2
  -3   9   3 2879.59 656.923   3
   3   9  -3 3189.45 585.201   3
   3   9  -2 9994.39 1007.88   3
   3   9  -2 8566.40 820.066   2
   3   9  -1 7592.14 898.113   3
   3   9  -1 6513.84 735.727   2
   3   9   0 10369.5 931.608   2
   3   9   0 11202.4 1071.04   3
   3   9   1 5896.39 838.025   3
   3   9   2 9580.27 1025.44   3
   3   9   3 3287.11 678.626   3
   3   9   4 708.902 363.573   3
   3   9   5 3539.05 658.222   3
   3  -9  -6 3668.25 364.597   2
   3   9   6 3221.16 616.244   3
   3   9   7 1556.58 479.762   3
   3   9   8 583.828 323.578   3
   3   9   9 13801.6 1310.06   3
   3   9  10 1963.24 573.265   3
   3   9  11 440.802 383.798   3
  -3  -9  11 262.027 284.717   3
   3   9  12 8255.87 1073.43   3
  -3  -9  12 5879.60 797.506   3
   3   9  13 627.612 381.523   3
  -3  -9  13 323.361 273.770   3
   3   9  14 477.619 309.397   3
   3   9  15 9256.61 1194.51   3
   3   9  16 584.618 380.936   3
   3   9  17 626.266 417.178   3
   3   9  18 4170.50 831.315   3
   3   9  19 565.561 362.963   3
   3   9  20 561.998 462.407   3
   3   9  21 2155.13 659.655   3
   3   9  22 2281.28 743.204   3
   3   9  23 3023.88 851.789   3
   3   9  24-65.6337 397.507   3
   3   9  25 544.683 688.462   3
  -3  10  23 34.1668 429.917   3
  -3  10  22 1227.82 687.125   3
  -3  10  21 5991.48 1120.42   3
  -3  10  20 6547.66 1211.38   3
  -3  10  19 3202.82 731.263   3
  -3  10  18 1244.73 574.988   3
  -3  10  17 665.359 546.681   3
  -3  10  16 2856.77 763.042   3
  -3  10  15-125.027 309.570   3
  -3  10  14 681.266 489.632   3
  -3  10  13 2156.68 636.380   3
  -3  10  12 2042.98 654.504   3
   3  10 -11 5370.84 784.819   2
  -3  10  11 5794.58 920.269   3
   3  10 -10 20.1546 277.689   2
  -3  10  10-35.3153 431.224   3
   3  10  -9 8718.53 925.504   2
  -3  10   9 9300.28 1179.68   3
   3  10  -8 7191.20 820.267   2
  -3  10   8 7098.97 1063.22   3
  -3  10   7 2202.98 575.935   3
   3  10  -7 1797.37 389.163   2
   3  10  -6 16673.7 1181.27   2
   3  10  -6 18144.5 1412.64   3
  -3  10   6 18588.6 1619.46   3
   3  10  -5 264.758 220.366   2
   3  10  -5 413.909 279.841   3
  -3  10   5 886.877 404.213   3
  -3  10   4 720.605 438.938   3
   3  10  -4 1095.01 391.163   3
   3  10  -4 622.010 212.986   2
   3  10  -3 713.338 274.676   2
  -3  10   3 1524.31 511.014   3
   3  10  -3 1516.28 459.993   3
   3  10  -2 716.506 311.834   2
   3  10  -2 60.4589 246.295   3
   3  10  -1 2255.42 537.878   3
   3  10  -1 2095.99 487.844   2
   3  10   0 1625.78 482.175   3
   3  10   1 2132.30 546.100   3
   3  10   2 952.018 438.017   3
   3  10   3 2474.13 619.977   3
   3  10   4 1295.96 555.681   3
   3  10   5 910.836 456.741   3
   3  10   6 17588.5 1534.26   3
   3  10   7 1294.49 510.629   3
   3  10   8 7187.22 1017.80   3
   3  10   9 10776.6 1207.41   3
   3  10  10 1508.27 553.870   3
   3  10  11 5446.84 874.996   3
   3  10  12 2629.53 732.590   3
   3  10  13 2922.67 716.841   3
   3  10  14 402.049 415.930   3
   3  10  15-329.362 285.351   3
   3  10  16 657.437 404.055   3
   3  10  17 660.764 414.491   3
   3  10  18 2639.88 696.607   3
   3  10  19 2899.35 768.156   3
   3  10  20 4760.84 885.333   3
   3  10  21 6281.90 1102.25   3
   3  10  22-136.179 312.784   3
   3  10  23 157.108 468.221   3
  -3  11  19-126.346 498.750   3
  -3  11  18 5354.03 1068.51   3
  -3  11  17 518.833 513.199   3
  -3  11  16 747.916 575.621   3
  -3  11  15 331.091 577.934   3
  -3  11  14 24.5621 363.913   3
  -3  11  13 1688.52 621.291   3
   3  11 -13 1282.62 475.090   2
   3  11 -12 8911.60 997.514   2
  -3  11  12 10140.6 1319.26   3
   3  11 -11 461.882 265.979   2
  -3  11  11 710.224 472.440   3
  -3  11  10 919.774 456.904   3
   3  11 -10 777.306 368.764   2
  -3  11   9 5040.25 939.689   3
   3  11  -9 3880.73 621.220   2
  -3  11   8 590.857 542.571   3
   3  11  -8 144.907 235.657   2
   3  11  -7 535.466 248.055   2
  -3  11   7 1410.69 565.765   3
   3  11  -6 378.721 288.069   2
  -3  11   6 149.682 467.070   3
  -3  11   5 7900.51 1148.44   3
   3  11  -5 6611.13 796.224   2
   3  11  -5 7597.11 1017.10   3
   3  11  -4 190.286 250.262   2
   3  11  -4-109.876 353.042   3
  -3  11   4-387.474 364.995   3
   3  11  -3 129.549 275.540   2
   3  11  -3-4.46145 286.256   3
   3  11  -2 1183.35 465.253   3
   3  11  -1 2708.28 663.869   3
   3  11   0 7274.07 992.491   3
   3  11   1 1905.63 522.361   3
   3  11   2 852.749 374.424   3
   3  11   3 170.690 271.811   3
   3  11   4 331.668 407.213   3
   3  11   5 6574.56 1011.87   3
   3  11   6 599.374 490.017   3
   3  11   7 1207.85 537.842   3
   3  11   8 1728.76 551.423   3
   3  11   9 5585.69 939.006   3
   3  11  10 1647.18 556.160   3
   3  11  11 353.470 460.021   3
   3  11  12 11964.1 1354.85   3
   3  11  13 2416.59 703.351   3
   3  11  14 403.778 418.224   3
   3  11  15 914.809 531.542   3
   3  11  16-494.087 386.888   3
   3  11  17 415.003 441.337   3
   3  11  18 7513.70 1169.52   3
   3  11  19-342.888 392.369   3
  -3  12  15 1615.85 754.590   3
  -3  12  14 902.073 433.344   3
  -3  12  13 56.1067 384.721   3
  -3  12  12 317.864 547.054   3
  -3  12  11 912.542 417.356   3
  -3  12  10 4.54315 400.917   3
  -3  12   9 8535.81 1293.52   3
  -3  12   8 4717.15 936.646   3
  -3  12   7 1067.47 607.393   3
  -3  12   6 348.510 315.495   3
   3  12  -4 2964.75 716.219   3
   3  12  -3 8672.88 1161.14   3
   3  12  -2 42.5423 263.457   3
   3  12  -1 178.305 316.320   3
   3  12   0 450.735 361.008   3
   3  12   1 517.152 468.684   3
   3  12   2 373.702 306.917   3
   3  12   3 9253.93 1225.86   3
   3  12   4 2563.23 688.612   3
   3  12   5-280.980 333.470   3
   3  12   6 552.397 486.697   3
   3  12   7 367.457 436.451   3
   3  12   8 5528.02 984.476   3
   3  12   9 10719.8 1356.84   3
   3  12  10 243.490 316.724   3
   3  12  11 324.015 408.492   3
   3  12  12 572.683 401.876   3
   3  12  13 555.551 376.615   3
   3  12  14 412.284 457.958   3
   3  12  15 828.100 470.830   3
  -3  13   9-317.702 391.007   3
  -3  13   8 1215.97 600.221   3
  -3  13   7 445.650 498.602   3
   3  13  -3 4299.29 858.637   3
   3  13  -2 866.774 460.766   3
   3  13  -1 1142.21 407.246   3
   3  13   0 1781.55 564.563   3
   3  13   1 1874.00 577.388   3
   3  13   2 755.956 467.046   3
   3  13   3 3218.64 711.908   3
   3  13   4-15.8174 293.175   3
   3  13   5 5026.38 957.900   3
   3  13   6-107.878 306.249   3
   3  13   7 393.745 455.597   3
   3  13   8 1170.65 593.061   3
   3  13   9 227.431 433.113   3
   4   0   0 6120.32 492.555   1
   4   0   0 6237.29 553.482   2
  -4   0   0 6141.80 499.521   1
   4   0   1 8022.11 630.955   2
   4   0   1 7772.61 520.322   1
   4   0  -1 7890.20 576.972   1
  -4   0   1 7057.84 558.119   1
  -4   0  -1 7901.64 551.996   1
  -4   0   2 24.4441 140.126   1
   4   0   2 142.206 145.132   2
  -4   0  -2 380.417 176.192   1
   4   0   2 311.100 144.902   1
   4   0  -2 185.106 180.012   1
  -4   0  -3 16187.5 700.287   1
   4   0  -3 15452.4 862.518   1
  -4   0  -3 15625.5 887.256   2
   4   0   3 15878.0 890.638   2
  -4   0   3 14088.8 825.647   1
  -4   0  -4 1011.19 180.371   1
   4   0   4 906.300 280.909   2
  -4   0   4 895.587 278.215   1
  -4   0  -4 1201.79 277.695   2
   4   0  -4 707.569 218.407   1
   4   0   5 3713.08 470.500   2
  -4   0   5 4844.21 531.522   1
   4   0  -5 4528.25 516.146   1
  -4   0  -5 4565.43 511.917   2
   4   0  -5 4452.65 337.827   3
  -4   0   6 21509.5 1106.91   1
   4   0  -6 20089.1 1107.71   1
   4   0  -6 19965.1 697.406   3
  -4   0  -6 21275.4 1093.40   2
   4   0  -7 1110.54 183.304   3
  -4   0  -7 1321.32 295.568   2
  -4   0   7 1071.87 327.324   1
   4   0  -8 2399.82 235.763   3
  -4   0  -8 2354.44 388.981   2
  -4   0   8 3099.51 474.792   1
  -4   0   9 37354.6 1580.13   1
  -4   0  -9 38685.4 1591.94   2
   4   0  -9 37383.7 935.100   3
   4   0 -10 124.409 77.1055   3
  -4   0 -10 430.553 229.244   2
  -4   0  10 526.107 314.974   1
  -4   0  11 485.116 129.469   3
   4   0 -11 531.785 139.357   3
  -4   0 -11 753.923 247.605   2
  -4   0  11 356.540 234.936   1
  -4   0  12 24957.4 1400.97   1
  -4   0  12 26904.6 888.761   3
   4   0 -12 25740.5 838.325   3
  -4   0  13 8274.75 518.183   3
  -4   0  13 9664.38 920.171   1
  -4   0  14 765.490 326.021   1
  -4   0  14 400.556 161.672   3
  -4   0  15 2691.28 562.466   1
  -4   0  15 1540.18 268.423   3
  -4   0  16 8320.89 594.064   3
  -4   0  16 7099.21 840.562   1
  -4   0  17 9735.54 989.597   1
  -4   0  17 11195.5 713.099   3
  -4   0  18 6135.88 833.660   1
  -4   0  18 6505.85 574.937   3
  -4   0  19 339.808 357.113   1
  -4   0  19 81.7142 155.179   3
  -4   0  20 707.977 252.595   3
  -4   0  20 1970.35 513.870   1
  -4   0  21 39300.0 2181.93   1
  -4   0  21 39477.2 1559.63   3
  -4   0  22 739.758 291.610   3
  -4   0  22 240.153 386.135   1
  -4   0  23 2560.46 445.970   3
  -4   0  23 3101.58 668.546   1
  -4   0  24 2687.61 489.503   3
  -4   0  24 2324.07 669.541   1
  -4   0  25 291.466 194.181   3
  -4   0  25-293.972 360.394   1
  -4   0  26 1648.71 433.943   3
  -4   0  26 634.227 494.524   1
  -4   0  27 780.940 435.951   1
  -4   0  27 2240.46 506.577   3
  -4   0  28 1290.41 400.706   3
  -4   0  28-101.190 400.625   1
  -4   0  29 766.450 492.659   1
  -4   0  30 6251.86 1031.84   1
  -4   0  31 2976.41 781.513   1
  -4   0  32 2185.07 740.593   1
  -4   0  33 6087.73 1142.40   1
  -4   1  31 654.378 526.911   1
  -4   1  30 776.282 417.536   1
  -4   1  30 82.0597 285.529   3
  -4   1  29 1406.91 488.542   3
  -4   1  29 457.101 346.587   1
  -4   1  28 9690.68 1234.68   1
  -4   1  28 10352.7 1072.25   3
  -4   1  27 7436.69 892.036   3
  -4   1  27 8513.28 1133.51   1
  -4   1  26 680.727 336.340   3
  -4   1  26 818.573 406.476   1
  -4   1  25 1412.23 408.514   3
  -4   1  25 613.822 420.043   1
  -4   1  24 7554.14 838.069   3
  -4   1  24 8700.05 1086.99   1
  -4   1  23 2710.56 511.545   3
  -4   1  23 1332.25 468.158   1
  -4   1  22 2500.46 643.467   1
  -4   1  22 2782.68 495.826   3
  -4   1  21 3624.46 690.615   1
  -4   1  21 2348.31 432.136   3
   4  -1  20 654.844 126.714   1
  -4   1  20 1285.01 466.848   1
  -4   1  20 1572.72 356.133   3
  -4   1  19 1597.40 471.933   1
   4  -1  19 779.932 120.014   1
  -4   1  19 1328.04 318.953   3
  -4   1  18 4474.89 688.229   1
  -4   1  18 4342.52 532.989   3
  -4   1  17 20255.1 1066.38   3
  -4   1  17 18766.6 1369.23   1
  -4   1  16 15498.0 916.762   3
  -4   1  16 14534.6 1168.58   1
  -4   1  15 11359.1 1007.69   1
  -4   1  15 11468.1 761.374   3
  -4   1  14 226.296 130.795   3
  -4   1  14 562.579 360.624   1
  -4   1  13 6780.21 557.413   3
  -4   1  13 4888.83 680.961   1
  -4   1  12 49600.4 1449.61   3
  -4  -1 -12 51418.7 2090.20   2
  -4   1  12 48736.4 1939.90   1
  -4  -1 -11 870.300 282.149   2
  -4   1  11 978.661 245.801   3
  -4   1  11 1474.26 396.271   1
  -4  -1 -10 3262.21 519.513   2
   4  -1  10 2549.02 193.092   1
  -4   1  10 4000.86 402.360   3
  -4   1  10 3498.14 551.783   1
  -4   1   9 22392.7 931.326   3
  -4  -1  -9 21877.1 1231.16   2
  -4   1   9 20966.2 1199.28   1
  -4   1   8 498.496 260.451   1
  -4  -1  -8 372.340 177.532   2
   4  -1   8 392.808 103.717   1
  -4  -1  -7 3071.94 455.363   2
  -4   1   7 3613.38 521.852   1
  -4  -1  -7 2922.31 212.411   1
   4   1  -7 2102.36 158.296   3
   4  -1   7 3141.93 258.904   1
   4   1  -6 1339.47 147.861   3
  -4  -1  -6 1571.93 330.696   2
  -4   1   6 1297.24 322.675   1
  -4  -1  -6 1665.51 181.521   1
   4  -1   6 1500.76 201.999   1
   4  -1   5 1775.37 314.272   2
  -4   1   5 2001.80 355.965   1
   4  -1   5 1998.40 246.677   1
  -4  -1  -5 2369.97 234.204   1
  -4  -1  -5 1827.90 342.190   2
  -4  -1  -4 1664.32 217.625   1
   4  -1   4 1370.91 285.483   2
   4  -1   4 2171.92 273.713   1
  -4  -1  -4 1737.79 334.521   2
  -4   1   4 2407.66 382.197   1
   4  -1   3 11615.6 734.214   2
  -4  -1  -3 12709.5 596.003   1
  -4  -1  -3 12348.3 835.165   2
   4  -1   3 14506.0 690.996   1
  -4   1   3 12071.7 804.847   1
   4  -1   2 3059.29 381.362   2
  -4  -1  -2 3682.04 358.814   1
   4  -1   2 3614.20 377.033   1
  -4   1   2 4134.54 469.428   1
   4  -1   1 1622.27 298.847   1
  -4  -1  -1 1744.54 304.299   1
  -4   1   1 1186.95 285.451   1
   4  -1   1 1103.92 243.598   2
   4  -1   0 98771.3 2081.96   2
  -4  -1   0 100438. 1933.81   1
   4  -1   0 100744. 2025.34   1
   4   1   0 100181. 2269.56   2
   4  -1  -1 1106.96 260.682   1
   4   1   1 1005.41 257.315   2
   4   1   2 3271.65 428.633   2
  -4  -1   2 3331.98 429.699   1
   4  -1  -2 3446.93 422.140   1
   4  -1  -3 9506.11 710.846   1
  -4  -1   3 9526.88 695.858   1
  -4   1  -3 9213.25 650.324   2
   4   1   3 10034.5 739.692   2
   4  -1  -4 1869.15 277.320   3
  -4  -1   4 1937.90 354.809   1
   4   1   4 1925.70 349.053   2
   4  -1  -4 1334.65 309.808   1
  -4   1  -4 1859.62 332.986   2
  -4  -1   5 1362.47 305.344   1
   4   1   5 2151.29 366.698   2
   4  -1  -5 2136.05 366.737   1
   4  -1  -5 1575.33 258.992   3
  -4   1  -5 2397.10 355.732   2
  -4   1  -6 1852.18 331.688   2
  -4  -1   6 2453.66 419.718   1
   4   1   6 1809.16 353.398   2
   4  -1  -6 1705.76 348.279   1
   4  -1  -6 2236.60 310.774   3
  -4   1  -7 3214.13 445.041   2
  -4  -1   7 3503.52 497.811   1
   4  -1  -7 2811.61 456.725   1
   4  -1  -7 3192.05 347.108   3
  -4   1  -8 463.502 190.635   2
  -4  -1   8 225.008 257.722   1
   4  -1  -8 157.479 201.085   1
   4  -1  -8 483.566 162.456   3
   4  -1  -9 24732.5 928.194   3
  -4  -1   9 25368.0 1357.80   1
  -4   1  -9 22317.5 1161.08   2
   4  -1  -9 24020.6 1325.26   1
   4  -1 -10 3077.62 512.706   1
  -4  -1  10 3241.20 537.810   1
  -4   1 -10 3022.12 473.863   2
   4  -1 -10 3030.59 342.496   3
   4  -1 -11 1385.01 397.961   1
   4  -1 -11 961.684 212.580   3
  -4  -1  11 1285.04 428.918   1
  -4   1 -11 1109.72 314.681   2
  -4  -1  12 48959.7 2023.00   1
   4  -1 -12 46597.4 2022.94   1
   4  -1 -12 51449.7 1442.48   3
   4  -1 -13 4807.00 463.621   3
  -4  -1  13 4362.22 676.181   1
  -4  -1  13 3462.79 253.749   3
   4  -1 -14 238.053 155.350   3
  -4  -1  14-68.5836 247.323   1
  -4  -1  14 149.058 88.0516   3
   4  -1 -15 13701.0 810.436   3
  -4  -1  15 14833.2 1205.35   1
  -4  -1  15 14704.2 605.410   3
  -4  -1  16 16392.9 1308.65   1
  -4  -1  16 15096.3 664.351   3
  -4  -1  17 19560.4 801.981   3
  -4  -1  17 18489.3 1421.34   1
  -4  -1  18 3234.22 657.592   1
  -4  -1  18 3252.53 357.490   3
  -4  -1  19 632.376 184.503   3
  -4  -1  19 880.580 435.928   1
  -4  -1  20 1603.24 300.762   3
  -4  -1  20 653.476 367.053   1
  -4  -1  21 3632.38 442.149   3
  -4  -1  21 4566.00 803.526   1
  -4  -1  22 2658.40 429.339   3
  -4  -1  22 1969.67 561.987   1
  -4  -1  23 2627.16 659.071   1
  -4  -1  23 2842.12 444.356   3
  -4  -1  24 9214.96 1170.80   1
  -4  -1  24 7697.32 717.282   3
  -4  -1  25 582.669 256.526   3
  -4  -1  25 617.490 343.761   1
  -4  -1  26 1214.23 367.543   3
  -4  -1  26 729.332 463.702   1
  -4  -1  27 6667.05 1006.95   1
  -4  -1  27 7468.10 781.380   3
  -4  -1  28 8410.35 1230.60   1
  -4  -1  29 687.837 533.205   1
  -4  -1  30-41.0111 378.963   1
  -4  -1  31 344.483 391.819   1
  -4  -1  32 2130.47 678.213   1
  -4  -1  33 2616.17 796.384   1
   4   1  33 2165.12 757.084   3
  -4   2  31 899.105 508.064   3
  -4   2  30 5882.45 920.083   3
  -4   2  29 1210.34 469.014   3
  -4   2  28 1186.98 487.799   3
  -4   2  27 4487.17 766.728   3
  -4   2  26 2348.71 528.002   3
  -4   2  25 1933.55 552.841   3
  -4   2  24 8095.38 915.700   3
   4  -2  24 6141.01 518.175   1
   4  -2  23 2424.90 338.055   1
  -4   2  23 3021.32 568.851   3
   4  -2  22 13321.3 725.663   1
  -4   2  22 16581.9 1245.17   3
   4  -2  21 8257.17 572.266   1
  -4   2  21 9557.10 925.971   3
  -4   2  21 8413.40 992.208   1
   4  -2  20 1143.40 232.394   1
  -4   2  20 1284.38 563.233   1
  -4   2  20 1162.76 351.905   3
  -4   2  19 976.323 455.779   1
  -4   2  19 249.290 182.279   3
   4  -2  19 712.356 180.476   1
  -4   2  18 16372.5 1082.81   3
  -4   2  18 13821.1 1204.22   1
  -4   2  17 2626.02 576.930   1
  -4   2  17 2494.78 466.029   3
  -4   2  16 5273.97 751.649   1
  -4   2  16 5051.75 597.194   3
  -4   2  15 37970.2 1529.59   3
  -4   2  15 36827.3 1816.45   1
  -4   2  14 2898.41 578.662   1
  -4   2  14 1858.29 331.468   3
  -4   2  13 13183.5 876.086   3
  -4   2  13 11811.1 1014.37   1
  -4   2  12 44027.9 1548.97   3
  -4   2  12 43707.0 1858.94   1
  -4   2  11 7922.47 646.858   3
  -4  -2 -11 9073.43 881.167   2
  -4   2  11 9914.16 894.254   1
  -4   2  10 2263.99 355.038   3
  -4   2  10 2896.00 551.987   1
  -4  -2 -10 2122.84 445.030   2
  -4   2   9 57892.8 1692.19   3
  -4  -2  -9 54521.3 2008.37   2
  -4   2   8 2129.05 328.780   3
  -4  -2  -8 1931.63 385.848   2
  -4  -2  -7 4023.27 551.640   2
  -4  -2  -6 24000.2 1242.51   2
   4   2  -5 1999.25 165.154   3
  -4  -2  -5 2421.90 423.990   2
   4  -2   4 3107.17 388.601   2
  -4  -2  -4 4061.99 514.386   2
  -4  -2  -3 7254.72 678.682   2
   4  -2   3 7021.98 548.616   2
   4  -2   2 4312.34 433.709   2
   4  -2   2 5336.83 484.229   1
   4   2  -1 5813.71 590.932   2
   4  -2   1 4807.84 444.220   2
   4  -2   1 4972.90 479.707   1
   4   2   0 15695.0 938.748   2
   4  -2   0 14751.9 768.745   2
   4  -2   0 16551.6 879.841   1
   4   2   1 6823.23 633.047   2
   4  -2  -1 6765.02 590.887   1
   4   2   2 4335.95 491.960   2
   4  -2  -2 3790.47 463.488   3
   4  -2  -2 4757.35 511.678   1
   4  -2  -3 10450.3 719.143   3
   4   2   3 10233.9 770.798   2
   4  -2  -3 10228.5 758.586   1
   4   2   4 3713.28 484.884   2
  -4   2  -4 3882.97 427.152   2
   4  -2  -4 3259.32 406.904   3
   4  -2  -4 4136.80 510.608   1
   4   2   5 3127.04 460.342   2
   4  -2  -5 3464.66 483.560   1
   4  -2  -5 3759.45 426.187   3
  -4   2  -5 2595.45 368.689   2
  -4   2  -6 17194.3 923.448   2
   4  -2  -6 17252.4 1071.17   1
   4  -2  -6 16424.9 886.265   3
   4   2   6 14505.3 940.067   2
  -4   2  -7 4876.81 521.817   2
   4  -2  -7 4579.90 564.920   1
   4  -2  -7 5378.07 509.249   3
   4  -2  -8 796.328 256.698   1
  -4   2  -8 1303.88 299.360   2
   4  -2  -8 1339.27 266.487   3
  -4   2  -9 46047.7 1620.04   2
   4  -2  -9 46473.1 1839.76   1
   4  -2  -9 49374.6 1517.64   3
   4  -2 -10 3287.54 399.638   3
  -4   2 -10 2798.26 425.431   2
   4  -2 -10 3396.87 556.908   1
  -4  -2  10 3363.52 583.396   1
  -4   2 -11 8047.41 716.379   2
  -4  -2  11 8831.39 894.036   1
   4  -2 -11 7560.47 784.428   1
   4  -2 -11 8847.35 675.205   3
   4  -2 -12 44530.4 1525.07   3
  -4  -2  12 44614.3 2030.02   1
  -4  -2  13 10868.9 1056.07   1
   4  -2 -13 10753.7 780.243   3
  -4  -2  14 986.687 393.161   1
   4  -2 -14 1276.67 268.919   3
   4  -2 -15 36197.3 1478.26   3
  -4  -2  15 38218.0 2026.31   1
   4  -2 -16 4358.81 555.424   3
  -4  -2  16 4606.70 746.034   1
  -4  -2  17 3148.45 699.487   1
   4  -2 -17 2960.44 455.661   3
  -4  -2  17 1316.51 171.737   3
  -4  -2  18 14037.8 1319.73   1
  -4  -2  18 10632.0 521.098   3
  -4  -2  19 258.812 133.662   3
  -4  -2  19 1023.32 517.416   1
  -4  -2  20 847.115 194.797   3
  -4  -2  20 970.918 521.512   1
  -4  -2  21 10201.0 1209.66   1
  -4  -2  21 8136.70 579.074   3
  -4  -2  22 14141.4 1433.60   1
  -4  -2  22 14145.9 808.249   3
  -4  -2  23 2630.32 393.602   3
  -4  -2  23 2784.50 738.117   1
  -4  -2  24 8725.83 705.413   3
  -4  -2  24 8628.90 1200.23   1
  -4  -2  25 2651.56 419.284   3
  -4  -2  25 1628.59 611.961   1
  -4  -2  26 1768.20 600.657   1
  -4  -2  27 3316.56 761.633   1
  -4  -2  28 482.774 417.070   1
  -4  -2  29 231.356 437.593   1
   4   2  29 690.452 470.880   3
  -4  -2  30 3907.16 868.476   1
   4   2  30 5382.90 1094.89   3
   4   2  31-217.282 542.627   3
  -4  -2  31 622.990 356.920   1
  -4  -2  32 2156.94 710.324   1
   4   2  32 1197.79 597.370   3
   4   2  33 3449.31 941.794   3
  -4  -2  33 4511.19 1015.83   1
  -4   3  31 3054.05 774.201   3
  -4   3  30 1299.06 553.812   3
  -4   3  29 1109.30 521.112   3
  -4   3  28 2396.07 644.274   3
  -4   3  27 5181.26 866.652   3
  -4   3  26 303.556 377.743   3
   4  -3  25 2712.78 413.560   1
  -4   3  25 2615.61 639.276   3
   4  -3  24 370.980 208.442   1
  -4   3  24 754.402 377.500   3
  -4   3  23 1891.24 610.893   3
   4  -3  23 1675.52 352.136   1
  -4   3  22 280.263 313.277   3
  -4   3  21 7441.47 842.221   3
  -4   3  20 5316.19 692.180   3
  -4  -3 -19 3232.55 296.945   1
  -4   3  19 3348.85 591.872   3
  -4  -3 -18 9169.46 496.602   1
  -4   3  18 10808.4 953.036   3
  -4   3  17 2444.91 487.998   3
  -4  -3 -17 2388.52 269.491   1
  -4  -3 -16 2797.10 295.930   1
  -4   3  16 2730.87 501.395   3
  -4   3  15 21665.5 1268.37   3
  -4  -3 -15 21966.6 809.237   1
  -4   3  14 3900.75 541.554   3
  -4   3  13 4416.32 549.285   3
  -4   3  12 5834.08 624.379   3
  -4   3  11 1190.92 315.137   3
  -4  -3 -10 8318.82 843.032   2
  -4   3  10 8619.10 722.627   3
  -4  -3  -9 105434. 2870.36   2
  -4   3   9 110804. 2618.75   3
  -4  -3  -8 362.291 210.247   2
  -4   3   8 244.048 229.927   3
  -4  -3  -7 266.593 222.864   2
  -4   3   7 225.489 193.876   3
  -4   3   6 64972.6 2002.92   3
  -4  -3  -6 62659.4 2078.53   2
  -4  -3  -5 6036.06 654.965   2
   4   3  -5 5418.26 316.302   3
  -4  -3  -4 3267.35 485.373   2
   4   3  -4 3456.65 286.076   3
   4   3  -3 88938.8 1504.43   3
  -4  -3  -3 89230.0 2438.21   2
   4  -3   3 82706.2 1750.55   2
   4   3  -2 6338.52 438.191   3
   4  -3   2 6491.57 487.378   2
   4   3  -1 7671.87 504.213   3
   4  -3   1 8396.08 544.903   2
   4   3  -1 8910.73 752.040   2
   4  -3   0 35594.2 1125.45   2
   4   3   0 37617.2 1162.25   3
   4   3   0 34179.0 1418.49   2
   4   3   1 9094.76 609.652   3
   4  -3  -1 8745.58 734.858   3
   4   3   1 8780.70 727.939   2
   4   3   2 5318.54 506.150   3
   4  -3  -2 5541.52 583.274   3
   4   3   2 4895.66 543.427   2
   4  -3  -3 85754.7 2235.18   3
   4   3   3 93971.0 2330.01   2
   4  -3  -3 92650.8 2378.20   1
   4   3   4 2615.98 430.105   2
   4  -3  -4 2991.95 445.290   1
   4  -3  -4 3613.49 475.438   3
   4  -3  -5 6214.83 619.888   3
  -4   3  -5 6132.42 509.460   2
   4   3   5 7231.23 684.999   2
   4  -3  -5 5439.07 609.147   1
   4  -3  -6 75142.3 2095.14   3
   4   3   6 71400.2 2104.28   2
   4  -3  -6 69470.0 2204.46   1
  -4   3  -6 69144.0 1762.58   2
  -4   3  -7 51.8185 138.048   2
   4  -3  -7 220.725 208.033   1
   4  -3  -7 97.3206 118.070   3
  -4   3  -8 706.441 232.665   2
   4  -3  -8 553.209 271.911   1
   4  -3  -8 774.585 243.933   3
   4  -3  -9 108142. 2526.47   3
  -4   3  -9 106284. 2400.52   2
   4  -3  -9 104748. 2870.85   1
   4  -3 -10 8130.10 715.698   3
  -4   3 -10 7969.28 665.489   2
   4  -3 -11 1221.35 306.983   3
  -4   3 -11 1114.99 290.382   2
   4  -3 -12 5044.02 586.017   3
   4  -3 -13 3090.32 474.238   3
   4  -3 -14 2727.87 458.816   3
   4  -3 -15 20600.9 1216.85   3
   4  -3 -16 3484.50 553.798   3
  -4  -3  16 2925.58 669.801   1
   4  -3 -17 3238.56 543.475   3
  -4  -3  17 3037.73 657.378   1
  -4  -3  18 8827.83 1083.02   1
   4  -3 -18 7842.43 820.596   3
  -4  -3  19 2761.64 671.135   1
  -4  -3  19 1306.11 169.847   3
  -4  -3  20 4598.10 852.778   1
  -4  -3  20 2265.83 254.331   3
  -4  -3  21 4907.19 854.585   1
  -4  -3  21 3756.17 348.717   3
  -4  -3  22 52.4841 119.283   3
  -4  -3  22 14.4920 374.969   1
   4   3  22-11.3545 292.255   3
  -4  -3  23 1235.47 244.186   3
  -4  -3  23 1403.54 609.647   1
   4   3  23 1004.61 432.056   3
  -4  -3  24 144.983 141.916   3
  -4  -3  24-526.442 492.400   1
   4   3  24 289.375 407.046   3
  -4  -3  25 2008.78 704.859   1
   4   3  25 3576.60 835.459   3
  -4  -3  26 759.465 469.254   1
   4   3  26 449.628 396.535   3
  -4  -3  27 4753.10 927.588   1
   4   3  27 4965.03 933.899   3
   4   3  28 1198.30 535.326   3
  -4  -3  28 808.814 559.790   1
  -4  -3  29 607.954 530.892   1
   4   3  29 1411.43 642.351   3
   4   3  30 1140.66 562.895   3
  -4  -3  30 1630.01 705.133   1
   4   3  31 2123.27 728.872   3
  -4  -3  31 1863.33 660.338   1
  -4  -3  32 54.8118 366.825   1
   4   3  32 552.490 438.357   3
  -4   4  31 425.489 469.028   3
  -4   4  30 1207.32 532.376   3
  -4   4  29 321.925 315.927   3
  -4   4  28 308.656 318.305   3
  -4   4  27 1916.68 572.490   3
  -4   4  26 338.588 339.493   3
  -4   4  25-201.132 357.107   3
  -4   4  24 1204.68 421.405   3
  -4   4  23 3905.27 700.388   3
  -4   4  22 5447.56 839.396   3
  -4   4  21 2239.46 516.690   3
  -4  -4 -20 1790.19 290.665   1
  -4   4  20 2251.66 569.823   3
  -4  -4 -19 3723.21 436.724   1
  -4   4  19 4010.93 682.729   3
  -4   4  18 26018.7 1569.91   3
  -4  -4 -18 24050.9 1043.45   1
  -4   4  17 3318.70 610.492   3
  -4  -4 -17 2931.33 390.700   1
  -4   4  16 820.606 341.756   3
  -4   4  15 8999.95 895.456   3
  -4   4  14 511.604 321.177   3
  -4   4  13 1251.22 374.804   3
  -4   4  12 1791.79 403.851   3
  -4   4  11 8741.42 828.153   3
  -4   4  10 8018.26 781.172   3
  -4   4   9 16621.7 1104.61   3
  -4  -4  -8 109.855 148.434   2
  -4   4   8 179.467 211.500   3
  -4  -4  -7 3357.67 504.381   2
   4   4  -7 3362.41 272.416   3
  -4   4   7 3157.82 500.346   3
   4   4  -6 71153.6 1282.13   3
  -4   4   6 73984.0 2323.41   3
  -4  -4  -6 68216.8 2245.30   2
  -4  -4  -5 5722.79 661.059   2
   4   4  -5 6319.57 422.246   3
   4   4  -4 823.474 180.084   3
  -4  -4  -4 770.315 228.540   2
   4   4  -3 8649.79 558.550   3
   4  -4   2 3126.79 531.114   3
   4  -4   2 4258.14 364.150   2
   4   4  -2 4620.04 584.149   2
   4   4  -2 3504.14 383.695   3
   4  -4   1 8515.44 832.416   3
   4   4  -1 8938.48 781.844   2
   4  -4   1 8012.86 495.497   2
   4   4  -1 9180.11 623.367   3
   4   4   0 21680.0 1169.46   2
   4  -4   0 21555.5 815.188   2
   4  -4   0 19511.2 1224.76   3
   4   4   0 20020.8 959.767   3
   4   4   1 9589.27 682.849   3
   4  -4  -1 8572.56 784.279   3
   4   4   1 8459.24 731.413   2
   4  -4  -2 4359.12 575.919   3
   4   4   2 4600.00 493.212   3
   4   4   2 3555.06 483.457   2
   4   4   3 7622.67 646.778   3
   4  -4  -3 7790.12 752.174   3
   4   4   3 6175.03 634.094   2
   4   4   4 757.054 281.569   2
   4   4   4 778.336 265.534   3
   4  -4  -4 380.773 208.972   3
   4   4   5 7540.19 713.788   3
   4  -4  -5 6850.90 704.592   3
  -4   4  -5 7302.71 518.807   2
   4   4   5 7281.92 711.004   2
   4  -4  -6 59242.8 2064.15   3
   4   4   6 58955.7 1937.10   3
  -4   4  -6 62826.3 1589.60   2
   4  -4  -6 59171.7 2151.05   1
  -4   4  -7 3168.73 382.014   2
   4  -4  -7 4045.59 596.355   1
   4   4   7 3973.87 555.581   3
   4  -4  -7 3934.31 552.093   3
  -4   4  -8 584.329 221.179   2
   4   4   8 511.438 291.276   3
   4  -4  -8 548.935 251.835   3
   4   4   9 15394.3 1075.92   3
  -4   4  -9 17625.8 956.568   2
   4  -4  -9 16647.3 1110.33   3
   4   4  10 9761.29 896.667   3
   4  -4 -10 8166.40 775.794   3
  -4   4 -10 8094.58 678.605   2
   4   4  11 8890.46 852.778   3
  -4   4 -11 8741.02 719.243   2
   4  -4 -11 9964.96 880.067   3
   4   4  12 2087.72 458.815   3
   4  -4 -12 2246.55 430.739   3
   4  -4 -13 1150.84 344.944   3
   4   4  13 1688.83 447.558   3
   4  -4 -14 453.387 247.173   3
   4   4  14 779.113 378.136   3
   4   4  15 9698.46 1010.12   3
   4   4  16 868.241 329.878   3
   4   4  17 3094.93 630.617   3
   4   4  18 25840.5 1704.66   3
   4   4  19 4580.48 771.411   3
  -4  -4  20 691.013 125.718   3
  -4  -4  20 868.587 148.773   3
  -4  -4  20 1154.75 472.566   1
  -4  -4  21 1360.07 192.775   3
  -4  -4  21 1510.82 220.270   3
   4   4  21 2806.64 646.589   3
  -4  -4  21 2841.24 676.749   1
  -4  -4  22 3869.45 873.974   1
  -4  -4  22 2153.58 249.237   3
   4   4  22 5204.42 908.012   3
  -4  -4  23 1187.69 569.010   1
  -4  -4  23 1245.97 225.735   3
   4   4  23 1861.83 532.302   3
  -4  -4  24 37.7950 358.052   1
   4   4  24 1449.49 465.295   3
  -4  -4  25 251.560 370.212   1
   4   4  25 429.659 414.451   3
  -4  -4  26 978.729 549.818   1
   4   4  26 1010.73 561.892   3
  -4  -4  27 1314.88 619.727   1
   4   4  27 1113.64 508.184   3
  -4  -4  28 637.127 415.702   1
   4   4  28 770.527 427.107   3
   4   4  29 1107.78 585.147   3
  -4  -4  29-47.0872 432.550   1
   4   4  30 2118.50 600.247   3
  -4  -4  30 719.578 506.301   1
   4   4  31 289.700 574.726   3
  -4  -4  31-485.903 358.506   1
  -4   5  31 3018.58 766.581   3
  -4   5  30 3733.51 887.398   3
  -4   5  29 3631.50 839.647   3
  -4   5  28 73.7088 421.475   3
  -4   5  27 6517.67 1028.40   3
  -4   5  26 353.148 481.706   3
  -4   5  25 268.872 347.799   3
  -4   5  24 1968.37 607.005   3
  -4   5  23 1371.81 525.468   3
  -4   5  22 340.100 418.605   3
  -4   5  21 7855.80 1003.77   3
  -4   5  20 4012.76 730.107   3
  -4   5  19 4383.71 740.546   3
  -4  -5 -19 5231.71 622.702   1
  -4   5  18 6874.90 880.870   3
  -4   5  17 345.645 355.441   3
  -4   5  16 2771.95 602.485   3
  -4   5  15 16863.4 1287.97   3
  -4   5  14 7999.02 881.559   3
  -4   5  13 1297.04 371.770   3
  -4   5  12 1659.88 417.374   3
  -4   5  11 313.411 247.854   3
  -4   5  10 3085.23 543.940   3
  -4   5   9 9061.27 880.481   3
  -4   5   8 182.620 201.959   3
  -4   5   7 6441.20 761.157   3
   4   5  -7 6345.29 468.567   3
   4   5  -6 11239.0 631.335   3
  -4   5   6 10473.2 949.503   3
  -4  -5  -6 9271.31 876.303   2
  -4   5   5 1708.76 384.767   3
   4   5  -5 2106.56 302.120   3
  -4  -5  -5 1950.35 405.967   2
   4   5  -4 6484.52 532.246   3
  -4  -5  -4 6476.92 726.480   2
   4   5  -3 23301.2 1298.74   2
   4   5  -3 25645.5 1071.30   3
   4   5  -2 7730.71 753.109   2
   4   5  -2 7988.90 621.932   3
   4   5  -1-32.1402 133.566   3
   4  -5   1-41.8677 86.9021   2
   4  -5   1-2.71594 214.012   3
   4   5  -1 74.8898 180.539   2
   4   5   0 17456.1 1080.44   2
   4  -5   0 16479.5 1193.16   3
   4  -5   0 18212.2 668.708   2
   4   5   0 19698.6 1035.17   3
   4   5   1 222.893 217.530   2
   4  -5  -1 159.108 260.452   3
   4   5   1 117.775 183.905   3
   4  -5  -1 71.8890 106.270   2
   4  -5  -2 8382.08 852.221   3
   4   5   2 7510.44 720.781   2
   4   5   2 7811.25 684.601   3
   4  -5  -3 22991.0 1411.25   3
   4   5   3 23283.2 1207.88   3
   4  -5  -4 8051.00 838.615   3
   4   5   4 7171.11 714.556   2
   4   5   4 6510.96 653.041   3
   4   5   5 1594.09 345.403   3
   4   5   5 2788.37 457.178   2
   4  -5  -5 1973.83 436.084   3
   4   5   6 9242.43 827.891   3
   4  -5  -6 8591.48 854.648   3
   4   5   7 6537.48 707.341   3
  -4  -5   7 7816.04 540.024   3
  -4   5  -7 7616.89 549.279   2
  -4   5  -8 31.2524 142.419   2
   4   5   8-17.9932 196.605   3
  -4  -5   8 0.83757 113.282   3
   4   5   9 13159.2 1053.99   3
  -4  -5   9 12946.5 622.361   3
  -4   5  -9 12825.4 792.742   2
  -4  -5  10 2109.56 250.641   3
  -4   5 -10 2832.97 401.629   2
   4   5  10 3416.59 590.184   3
  -4   5 -11 485.187 212.820   2
  -4  -5  11 216.677 104.301   3
  -4  -5  12 1300.40 174.152   3
   4   5  12 2848.27 561.183   3
  -4   5 -12 2893.23 433.835   2
  -4  -5  13 565.802 113.535   3
   4   5  13 1315.63 434.789   3
   4   5  14 7815.71 906.478   3
  -4  -5  14 3065.54 228.146   3
   4   5  15 18695.4 1402.34   3
  -4  -5  15 6280.92 314.475   3
  -4  -5  16 634.387 104.506   3
   4   5  16 2363.22 557.552   3
  -4  -5  17 17.3077 43.8252   3
   4   5  17 123.525 276.219   3
   4   5  18 3845.92 724.955   3
  -4  -5  18 1555.01 170.150   3
   4   5  19 3445.20 652.034   3
  -4  -5  19 1443.74 179.346   3
   4   5  20 3025.30 648.852   3
  -4  -5  20 1119.33 155.445   3
   4   5  21 5612.52 909.419   3
   4   5  22 57.8469 331.176   3
   4   5  23 1207.58 523.428   3
   4   5  24 1871.92 593.851   3
  -4  -5  24 664.182 453.755   1
  -4  -5  25 448.310 416.095   1
   4   5  25 1527.66 640.923   3
  -4  -5  26-350.486 379.305   1
   4   5  26 758.838 502.853   3
  -4  -5  27 3414.13 842.250   1
   4   5  27 5084.33 959.090   3
  -4  -5  28 416.049 502.828   1
   4   5  28 322.424 358.151   3
  -4  -5  29 2543.46 785.547   1
   4   5  29 1805.48 711.454   3
  -4  -5  30 3282.51 985.909   1
   4   5  30 4320.72 972.694   3
   4   5  31 3088.86 849.813   3
  -4   6  29 641.050 408.928   3
  -4   6  28 738.997 505.977   3
  -4   6  27 749.230 468.692   3
  -4   6  26 116.663 367.447   3
  -4   6  25 5199.72 952.587   3
  -4   6  24 1093.83 458.853   3
  -4   6  23 3389.23 783.230   3
  -4   6  22 690.141 464.217   3
  -4   6  21 7570.57 1046.24   3
  -4   6  20 891.376 424.694   3
  -4   6  19 5829.99 865.693   3
  -4   6  18 15945.5 1375.11   3
  -4   6  17 3808.55 723.460   3
  -4   6  16 325.100 315.850   3
  -4   6  15 6947.12 869.968   3
  -4   6  14 1757.06 453.488   3
  -4   6  13-144.866 265.396   3
  -4   6  12 1359.83 445.955   3
  -4   6  11 1774.02 466.407   3
  -4   6  10 3985.91 690.673   3
  -4   6   9 40363.1 1981.43   3
  -4   6   8 5798.76 776.852   3
  -4   6   7 1528.66 433.477   3
   4   6  -7 3216.61 399.727   3
  -4   6   6 27389.4 1651.11   3
   4   6  -6 28409.7 1160.73   3
   4   6  -5 261.769 159.434   3
  -4   6   5 815.645 328.215   3
   4   6  -4 4086.28 469.679   3
   4   6  -4 3166.91 526.459   2
   4   6  -3 7489.36 760.997   2
   4   6  -3 7097.70 655.150   3
   4   6  -2 757.904 312.255   2
   4   6  -2 878.097 271.589   3
   4   6  -1 2132.56 386.874   3
   4   6  -1 1630.36 366.095   2
   4   6   0 23575.3 1304.31   2
   4   6   0 23595.4 1226.28   3
   4   6   1 2281.57 418.263   3
   4   6   1 2617.50 449.362   2
  -4  -6   1 3030.38 479.290   3
   4  -6  -1 2260.06 213.757   2
   4   6   2 611.484 266.462   3
   4   6   2 399.772 220.498   2
  -4  -6   2 932.124 291.145   3
  -4  -6   3 8200.03 710.483   3
   4   6   3 7732.08 762.372   2
   4   6   3 8532.20 809.713   3
   4   6   4 3486.04 552.900   3
   4   6   4 3579.74 540.011   2
  -4  -6   4 3463.98 460.047   3
   4   6   5 1010.33 351.391   3
  -4  -6   5 257.988 211.268   3
  -4  -6   6 28152.9 1207.48   3
   4   6   6 28483.3 1519.72   3
   4   6   7 2461.14 496.066   3
  -4  -6   7 3219.77 415.395   3
  -4  -6   8 6764.87 571.497   3
  -4   6  -8 6466.25 484.343   2
   4   6   8 6031.43 745.108   3
  -4  -6   9 37020.2 1275.61   3
  -4   6  -9 39516.7 1278.24   2
   4   6   9 35063.3 1785.65   3
  -4   6 -10 2814.26 379.590   2
   4   6  10 3294.09 615.899   3
  -4  -6  10 2646.25 352.183   3
  -4   6 -11 2213.95 366.526   2
  -4  -6  11 2279.18 314.958   3
   4   6  11 2870.52 548.940   3
  -4  -6  12 1008.07 219.854   3
  -4   6 -12 932.136 273.186   2
   4   6  12 505.234 312.380   3
  -4  -6  13 168.024 120.059   3
   4   6  13 495.518 304.452   3
  -4   6 -13 672.174 219.239   2
  -4  -6  14 1713.79 261.261   3
   4   6  14 3031.17 651.433   3
   4   6  15 5235.58 776.188   3
  -4  -6  15 3709.24 365.645   3
  -4  -6  16 220.480 135.322   3
   4   6  16 667.197 361.077   3
  -4  -6  17 1952.89 270.923   3
   4   6  17 4243.73 765.727   3
   4   6  18 13753.0 1342.60   3
   4   6  19 5026.67 849.294   3
   4   6  20 1593.52 567.591   3
   4   6  21 7949.25 1075.47   3
   4   6  22 1122.67 486.536   3
   4   6  23 2198.81 642.836   3
   4   6  24 458.997 439.160   3
   4   6  25 3588.74 797.379   3
   4   6  26 758.729 514.597   3
  -4  -6  26 31.4419 472.773   1
  -4  -6  27 921.758 682.841   1
   4   6  27 1319.36 592.408   3
  -4  -6  28 1065.23 547.879   1
   4   6  28-343.002 419.460   3
  -4  -6  29 84.5029 505.588   1
   4   6  29 204.533 459.180   3
  -4   7  28 720.598 460.189   3
  -4   7  27 1729.17 780.796   3
  -4   7  26-372.981 348.445   3
  -4   7  25 737.555 500.616   3
  -4   7  24 5984.06 1029.94   3
  -4   7  23 703.478 442.080   3
  -4   7  22 1631.13 619.784   3
  -4   7  21 5144.90 904.194   3
  -4   7  20 2281.09 592.591   3
  -4   7  19 1803.05 572.481   3
  -4   7  18 2393.98 628.366   3
  -4   7  17 3261.11 700.712   3
  -4   7  16 4273.23 754.764   3
  -4   7  15 14486.1 1330.58   3
  -4   7  14 4575.79 810.710   3
  -4   7  13 3623.14 716.358   3
  -4   7  12 16788.1 1394.98   3
  -4   7  11 3921.57 694.663   3
  -4   7  10 2118.75 554.519   3
  -4   7   9 6465.79 853.928   3
  -4   7   8 1479.06 481.690   3
  -4   7   7 4460.42 709.764   3
   4   7  -7 3525.25 476.204   3
  -4   7   6 1876.24 508.793   3
   4   7  -6 1486.46 327.231   3
  -4   7   5 2650.58 585.602   3
   4   7  -5 3462.84 476.021   3
   4   7  -5 3424.85 557.399   2
   4   7  -4 9362.04 919.667   2
   4   7  -4 10417.8 838.403   3
   4   7  -3 3164.64 494.677   3
   4   7  -3 2848.74 511.670   2
   4   7  -2 2742.93 479.572   3
   4   7  -2 2223.51 420.704   2
   4   7  -1 5924.30 705.741   2
  -4  -7  -1 7144.22 798.863   3
   4   7  -1 7203.02 745.261   3
  -4  -7   0 40362.2 1824.47   3
   4   7   0 39625.0 1740.33   3
   4   7   0 40459.8 1747.12   2
  -4  -7   1 8718.29 840.354   3
   4   7   1 7008.57 757.643   2
   4   7   1 6919.49 768.722   3
   4   7   2 2102.74 432.163   3
   4  -7  -2 1543.30 144.841   2
   4   7   2 2175.01 454.187   2
  -4  -7   2 2781.35 499.497   3
   4   7   3 4015.59 597.926   3
   4   7   3 4671.11 601.747   2
  -4  -7   3 3477.29 520.462   3
  -4  -7   4 10037.8 848.385   3
   4   7   4 11005.9 998.162   3
   4   7   4 10605.3 928.358   2
   4   7   5 3563.74 605.641   3
  -4  -7   5 3325.60 506.968   3
   4   7   6 1066.66 355.281   3
  -4  -7   6 1293.84 323.935   3
   4   7   7 3679.88 617.821   3
  -4  -7   7 4028.17 532.168   3
   4   7   8 1311.48 422.573   3
  -4  -7   8 1082.37 270.963   3
  -4  -7   9 4323.48 530.627   3
  -4   7  -9 4410.58 372.467   2
   4   7  10 1203.46 390.519   3
  -4  -7  10 1547.63 328.590   3
  -4   7 -10 1177.88 229.397   2
   4   7  11 3472.30 682.964   3
  -4  -7  11 3312.50 447.797   3
  -4   7 -11 3851.92 430.932   2
  -4   7 -12 19310.2 987.602   2
   4   7  12 20417.6 1487.32   3
  -4  -7  12 18053.4 1012.06   3
  -4  -7  13 4255.67 495.095   3
   4   7  13 3828.13 714.762   3
  -4   7 -13 4024.98 485.979   2
   4   7  14 3905.95 728.350   3
  -4   7 -14 2882.88 429.668   2
  -4  -7  14 3853.39 477.029   3
  -4  -7  15 13149.2 843.964   3
   4   7  15 16087.4 1413.59   3
   4   7  16 4173.41 766.325   3
   4   7  17 1373.62 504.933   3
   4   7  18 2361.23 634.214   3
   4   7  19 2318.78 578.223   3
   4   7  20 2795.38 696.656   3
   4   7  21 4401.91 835.615   3
   4   7  22 1566.95 580.652   3
   4   7  23 941.429 562.122   3
   4   7  24 7366.47 1091.17   3
   4   7  25 314.745 472.664   3
   4   7  26 154.533 401.535   3
   4   7  27 516.247 462.043   3
   4   7  28 1085.24 544.523   3
  -4   8  26 1574.53 667.410   3
  -4   8  25 8253.20 1331.98   3
  -4   8  24 2340.75 752.477   3
  -4   8  23 806.589 484.956   3
  -4   8  22 1894.91 702.859   3
  -4   8  21 8360.64 1168.91   3
  -4   8  20 6798.44 1090.51   3
  -4   8  19 1663.70 613.047   3
  -4   8  18 709.285 439.641   3
  -4   8  17 1466.67 500.314   3
  -4   8  16 985.149 444.983   3
  -4   8  15 2040.64 585.204   3
  -4   8  14 3497.46 719.605   3
  -4   8  13 1744.24 580.394   3
  -4   8  12 6050.70 916.025   3
  -4   8  11 4834.80 827.873   3
  -4   8  10 601.032 372.941   3
  -4   8   9 13742.2 1294.73   3
  -4   8   8 7150.09 972.944   3
   4   8  -7 2542.03 488.221   3
   4   8  -7 1779.71 461.366   2
  -4   8   7 1732.83 537.049   3
  -4   8   6 7815.84 1016.36   3
   4   8  -6 7967.99 886.876   2
   4   8  -6 9294.02 852.895   3
  -4   8   5 1721.10 568.894   3
   4   8  -5 1526.51 363.330   3
   4   8  -5 1555.41 384.014   2
   4   8  -4 8703.11 876.640   2
   4   8  -4 10040.4 886.745   3
   4   8  -3 14416.7 1091.84   3
   4   8  -3 14974.0 1116.74   2
   4   8  -2 504.058 255.099   2
   4   8  -2 337.705 214.156   3
   4   8  -1 3002.67 536.026   2
   4   8  -1 4867.17 688.586   3
   4   8   0 17283.8 1245.57   3
   4   8   0 15988.8 1187.26   2
   4   8   1 3715.59 544.336   2
   4   8   1 4144.00 635.328   3
   4   8   2 575.360 328.715   2
  -4  -8   2 614.490 309.920   3
   4   8   2 712.846 379.728   3
  -4  -8   3 11443.9 1017.40   3
   4   8   3 12281.8 1129.59   3
   4   8   3 13061.4 1064.00   2
  -4  -8   4 9175.32 915.036   3
   4   8   4 8389.84 947.329   3
   4   8   5 1370.84 440.472   3
  -4  -8   5 1327.12 382.153   3
  -4  -8   6 8828.52 879.112   3
   4   8   6 9001.49 1007.94   3
   4   8   7 2458.41 538.753   3
  -4  -8   7 1761.60 423.102   3
  -4  -8   8 8142.94 822.367   3
   4   8   8 9123.44 1032.42   3
  -4  -8   9 14689.6 1092.32   3
   4   8   9 13969.7 1265.63   3
   4   8  10 1452.40 540.570   3
  -4  -8  10 1036.00 345.730   3
  -4   8 -11 4191.00 358.644   2
   4   8  11 5047.49 807.572   3
  -4  -8  11 4267.25 596.520   3
   4   8  12 6890.42 950.965   3
  -4  -8  12 5526.14 661.779   3
   4   8  13 2189.15 572.759   3
  -4  -8  13 1582.43 355.684   3
   4   8  14 4289.45 753.519   3
   4   8  15 3474.97 717.973   3
   4   8  16 998.288 489.127   3
   4   8  17 2665.40 660.923   3
   4   8  18 315.289 319.147   3
   4   8  19 2065.62 660.539   3
   4   8  20 3860.78 767.795   3
   4   8  21 10082.8 1267.06   3
   4   8  22 1998.05 641.413   3
   4   8  23 300.127 374.167   3
   4   8  24 2591.92 767.905   3
   4   8  25 6635.97 1111.16   3
   4   8  26 1174.87 583.268   3
  -4   9  24 3370.04 879.017   3
  -4   9  23-182.143 422.509   3
  -4   9  22 842.145 561.331   3
  -4   9  21 9049.04 1256.79   3
  -4   9  20 1158.75 525.734   3
  -4   9  19 83.9185 353.148   3
  -4   9  18 1317.89 576.191   3
  -4   9  17 2356.62 637.937   3
  -4   9  16 1193.11 537.433   3
  -4   9  15 3913.76 749.874   3
  -4   9  14 562.359 355.044   3
  -4   9  13 3002.30 706.115   3
  -4   9  12 13623.6 1427.09   3
  -4   9  11 2814.99 717.777   3
  -4   9  10 3673.74 744.852   3
  -4   9   9 509.807 381.723   3
   4   9  -9 485.926 389.357   2
  -4   9   8 1744.58 582.561   3
   4   9  -8 2303.76 512.707   2
   4   9  -7 1385.45 398.537   3
  -4   9   7 1749.41 582.227   3
   4   9  -7 1518.01 432.004   2
  -4   9   6 3036.88 631.699   3
   4   9  -6 2762.14 548.753   3
   4   9  -6 2068.37 456.689   2
   4   9  -5 3948.32 626.011   3
   4   9  -5 3404.24 583.249   2
   4   9  -4 911.237 353.325   2
   4   9  -4 1507.59 456.168   3
   4   9  -3 3443.37 592.783   2
   4   9  -3 3563.20 602.381   3
   4   9  -2 469.707 332.527   3
   4   9  -2-277.514 276.854   2
   4   9  -1-324.500 311.962   2
   4   9  -1 284.555 317.024   3
   4   9   0 11917.9 1071.13   2
   4   9   0 13061.6 1172.68   3
   4   9   1 582.500 340.409   2
   4   9   1 135.915 213.103   3
   4   9   2 178.851 272.317   3
   4   9   3 4869.60 763.825   3
   4   9   4 1683.46 476.039   3
   4   9   5 4321.24 736.660   3
   4   9   6 2199.18 530.495   3
   4   9   7 1657.71 545.342   3
  -4  -9   7 729.636 367.295   3
   4   9   8 2552.87 618.517   3
  -4  -9   8 2492.16 521.788   3
   4   9   9 698.106 387.172   3
  -4  -9   9 523.239 293.399   3
   4   9  10 3678.44 702.226   3
  -4  -9  10 3115.47 579.039   3
   4   9  11 2118.59 593.260   3
   4   9  12 12253.9 1286.13   3
   4   9  13 2568.93 641.982   3
   4   9  14 428.986 291.091   3
   4   9  15 5384.02 916.952   3
   4   9  16 675.682 411.015   3
   4   9  17 3775.56 819.430   3
   4   9  18 1268.04 551.932   3
   4   9  19-199.857 300.854   3
   4   9  20 1352.39 599.220   3
   4   9  21 7683.53 1165.99   3
   4   9  22 1300.00 584.050   3
   4   9  23-110.547 303.025   3
   4   9  24 3890.90 904.240   3
  -4  10  21 1907.30 597.001   3
  -4  10  20 3430.12 848.893   3
  -4  10  19 865.173 512.285   3
  -4  10  18 2377.93 750.651   3
  -4  10  17 863.661 521.533   3
  -4  10  16 1652.98 617.956   3
  -4  10  15 1712.09 664.408   3
  -4  10  14 3808.53 858.918   3
  -4  10  13 890.647 513.589   3
  -4  10  12 3568.16 784.838   3
   4  10 -11 3340.25 693.957   2
  -4  10  11 4824.02 934.662   3
  -4  10  10 1377.77 561.474   3
   4  10 -10 885.514 404.229   2
  -4  10   9 483.641 379.480   3
   4  10  -9 1131.40 394.253   2
   4  10  -8 1959.39 487.257   2
  -4  10   8 2878.14 663.267   3
  -4  10   7 3118.23 756.337   3
   4  10  -7 3254.02 586.257   2
   4  10  -6 6790.91 825.644   2
  -4  10   6 5909.61 1001.38   3
   4  10  -6 6855.71 856.963   3
   4  10  -5 976.177 364.587   2
   4  10  -5 1234.83 410.810   3
   4  10  -4 4658.42 688.957   2
   4  10  -4 6186.27 844.661   3
   4  10  -3 9895.30 1072.64   3
   4  10  -3 10434.9 1008.53   2
   4  10  -2 538.381 289.257   3
   4  10  -2-361.731 295.280   2
   4  10  -1 691.880 341.686   2
   4  10  -1 631.049 324.181   3
   4  10   0 11570.7 1185.32   3
   4  10   0 9241.29 990.978   2
   4  10   1 5.42252 315.830   3
   4  10   2 1181.38 501.284   3
   4  10   3 10926.3 1180.14   3
   4  10   4 6857.04 949.930   3
   4  10   5 1159.17 470.921   3
   4  10   6 7464.03 999.178   3
   4  10   7 1795.07 544.249   3
   4  10   8 2811.21 638.333   3
   4  10   9 813.160 463.588   3
   4  10  10 1168.46 487.252   3
   4  10  11 3984.40 790.510   3
   4  10  12 4680.31 866.888   3
   4  10  13 1470.73 571.623   3
   4  10  14 2418.76 694.777   3
   4  10  15 2072.45 656.355   3
   4  10  16 3020.51 756.395   3
   4  10  17 372.593 270.707   3
   4  10  18 1680.29 566.263   3
   4  10  19 849.305 566.142   3
   4  10  20 1566.48 592.235   3
   4  10  21 1790.77 595.975   3
  -4  11  18 1951.72 644.164   3
  -4  11  17 1178.02 573.880   3
  -4  11  16 1043.96 618.579   3
  -4  11  15 4483.40 950.284   3
  -4  11  14 3361.06 851.937   3
   4  11 -14 2344.89 638.842   2
  -4  11  13 920.230 474.109   3
   4  11 -13 896.607 409.351   2
  -4  11  12 395.165 345.126   3
   4  11 -12 144.526 310.260   2
  -4  11  11 389.511 356.143   3
   4  11 -11 826.744 414.580   2
  -4  11  10 5431.98 1019.45   3
   4  11 -10 5853.00 869.592   2
  -4  11   9 2000.92 535.567   3
   4  11  -9 1018.68 448.032   2
   4  11  -8 457.249 271.577   2
  -4  11   8 943.912 528.901   3
   4  11  -7 2553.79 585.989   2
  -4  11   7 3348.48 770.574   3
   4  11  -6 3044.04 606.844   2
   4  11  -6 2986.34 625.832   3
   4  11  -5 1027.86 397.012   2
   4  11  -5 832.868 373.889   3
   4  11  -4 328.330 290.659   2
   4  11  -4 759.130 355.186   3
   4  11  -3 4130.33 696.373   2
   4  11  -3 5827.67 891.982   3
   4  11  -2 2413.16 557.752   2
   4  11  -2 4192.17 757.269   3
   4  11  -1 1698.64 492.158   3
   4  11   0 756.614 440.623   3
   4  11   1 841.312 402.263   3
   4  11   2 3836.23 735.342   3
   4  11   3 4979.57 875.164   3
   4  11   4-245.014 281.512   3
   4  11   5 791.259 414.194   3
   4  11   6 2892.09 733.969   3
   4  11   7 2152.78 637.002   3
   4  11   8 817.545 417.709   3
   4  11   9 1574.60 450.290   3
   4  11  10 7388.41 1052.40   3
   4  11  11 407.130 323.446   3
   4  11  12 824.831 444.454   3
   4  11  13 908.926 548.056   3
   4  11  14 2019.50 620.944   3
   4  11  15 4832.01 973.337   3
   4  11  16 336.093 337.487   3
   4  11  17 614.993 505.824   3
   4  11  18 1783.27 644.093   3
  -4  12  13 266.373 419.285   3
  -4  12  12 844.010 485.250   3
  -4  12  11 1678.29 598.699   3
  -4  12  10 337.061 386.603   3
  -4  12   9-222.529 346.996   3
   4  12  -5 6605.03 941.107   3
   4  12  -4 163.566 360.861   2
   4  12  -4 142.829 325.660   3
   4  12  -3 4428.92 859.373   3
   4  12  -2 668.872 370.995   3
   4  12  -1 2240.72 599.243   3
   4  12   0 524.990 296.831   3
   4  12   1 2658.95 702.596   3
   4  12   2 497.450 424.290   3
   4  12   3 5421.63 894.938   3
   4  12   4 65.5136 439.615   3
   4  12   5 7895.98 1164.93   3
   4  12   6 9975.51 1290.54   3
   4  12   7 985.221 505.303   3
   4  12   8 277.962 364.472   3
   4  12   9 385.124 319.578   3
   4  12  10 371.656 305.359   3
   4  12  11 2455.69 691.939   3
   4  12  12 323.054 405.333   3
   4  12  13 399.065 387.117   3
   4  12  14 2923.64 767.968   3
   4  13  -4 908.322 479.807   3
   4  13  -3 1279.60 486.274   3
   4  13  -2 2088.54 606.892   3
   4  13  -1 2534.08 687.305   3
   4  13   0 1431.71 557.285   3
   4  13   1 1893.25 613.912   3
   4  13   2 3983.75 847.555   3
   4  13   3 1507.55 538.383   3
   4  13   4 624.776 396.272   3
   4  13   5 872.519 448.594   3
  -5   0   0-68.8184 168.175   1
   5   0   0 136.007 178.178   2
  -5   0   1 212.764 163.944   1
  -5   0  -1 164.261 164.108   1
   5   0   1-118.565 165.890   2
  -5   0  -2 8092.99 597.515   1
   5   0   2 7776.96 696.958   2
  -5   0   2 9188.61 725.256   1
   5   0   3 57031.8 1873.82   2
  -5   0   3 59024.0 1833.26   1
  -5   0  -3 58400.5 1542.18   1
  -5   0  -4 334.594 167.384   1
  -5   0   4 318.370 263.578   1
   5   0   4 146.718 200.271   2
  -5   0  -4 113.503 158.234   2
  -5   0   5 205.956 239.236   1
   5   0   5 198.972 188.707   2
  -5   0  -5 118.570 156.057   2
   5   0  -6 32215.3 1030.38   3
  -5   0  -6 33559.5 1539.70   2
  -5   0   6 33222.2 1505.62   1
   5   0   6 35238.5 1534.58   2
  -5   0   7 3108.09 531.677   1
   5   0  -7 3291.79 330.173   3
  -5   0  -7 3375.42 503.901   2
  -5   0  -8 4141.95 560.969   2
  -5   0   8 4912.09 646.451   1
   5   0  -8 5138.32 397.884   3
   5   0  -9 28099.0 883.700   3
  -5   0  -9 26823.4 1419.71   2
  -5   0   9 28454.1 1488.14   1
  -5   0 -10 6038.22 708.997   2
  -5   0  10 7300.03 807.354   1
   5   0 -10 6312.31 425.718   3
  -5   0  11 3132.63 527.710   1
  -5   0 -11 2979.27 510.530   2
   5   0 -11 3459.07 326.567   3
  -5   0  12 2170.33 485.218   1
   5   0 -12 1836.84 242.918   3
  -5   0  13 316.477 234.059   1
   5   0 -13 78.9259 101.801   3
  -5   0  14-265.963 316.621   1
  -5   0  15 12854.9 699.338   3
  -5   0  15 10125.3 1031.46   1
  -5   0  16 464.144 372.008   1
  -5   0  16 548.705 169.591   3
  -5   0  17-113.913 251.449   1
  -5   0  17 293.391 161.770   3
  -5   0  18 31.4698 337.712   1
  -5   0  18 585.001 231.849   3
  -5   0  19 5112.17 520.075   3
  -5   0  19 3161.48 642.844   1
  -5   0  20 2969.50 426.737   3
  -5   0  20 3357.67 693.262   1
  -5   0  21 4175.85 797.505   1
  -5   0  21 3489.44 475.962   3
  -5   0  22 23310.6 1225.39   3
  -5   0  22 23799.3 1848.64   1
  -5   0  23 9756.88 825.741   3
  -5   0  23 9048.33 1143.18   1
  -5   0  24-517.696 430.692   1
  -5   0  24 483.662 278.766   3
  -5   0  25 502.671 270.188   3
  -5   0  25 694.590 444.014   1
  -5   0  26 1183.48 540.756   1
  -5   0  26 310.917 219.348   3
  -5   0  27 9922.51 1299.61   1
  -5   0  28 6356.74 1092.51   1
  -5   0  29 912.322 468.527   1
  -5   0  30 1903.45 708.195   1
  -5   0  31 988.338 508.167   1
  -5   0  32 1840.04 896.318   1
  -5   1  31 2333.80 820.154   1
  -5   1  30 2082.77 649.840   1
  -5   1  29 1507.31 645.043   1
  -5   1  28 1626.53 668.613   1
  -5   1  27 3808.73 823.191   1
  -5   1  27 4788.59 735.873   3
  -5   1  26 3474.95 812.131   1
  -5   1  26 4063.57 655.352   3
  -5   1  25 3565.96 732.365   1
  -5   1  25 4278.43 689.613   3
  -5   1  24 1416.72 488.662   1
  -5   1  24 2064.68 472.312   3
  -5   1  23 442.547 405.527   1
  -5   1  23 654.984 336.016   3
  -5   1  22 9547.50 1154.70   1
  -5   1  22 8491.91 834.046   3
  -5   1  21 1445.70 561.751   1
  -5   1  21 1647.27 386.277   3
  -5   1  20 1368.33 519.749   1
  -5   1  20 1757.80 412.598   3
  -5   1  19 7926.48 736.854   3
  -5   1  19 8595.61 1046.19   1
  -5   1  18 27025.3 1291.16   3
  -5   1  18 26996.4 1736.62   1
  -5   1  17 1248.67 422.862   1
  -5   1  17 1194.20 294.822   3
  -5   1  16 4335.17 717.731   1
  -5   1  16 4327.33 509.317   3
  -5   1  15 29077.0 1231.34   3
  -5   1  15 27925.1 1678.44   1
  -5   1  14 689.488 353.145   1
  -5   1  14 803.716 216.869   3
  -5   1  13 17.9322 239.349   1
  -5   1  13-118.292 142.446   3
  -5   1  12 7438.18 828.668   1
  -5   1  11 3050.11 531.494   1
   5  -1  11 1775.18 159.282   1
  -5   1  10 269.748 261.928   1
   5   1 -10 201.622 63.5563   3
   5  -1  10 310.099 99.1365   1
   5  -1   9 27537.3 766.021   1
  -5  -1  -9 24528.1 1414.29   2
  -5   1   9 25791.5 1433.43   1
  -5  -1  -8 8015.72 407.751   1
   5   1  -8 7168.19 353.604   3
   5  -1   8 9707.28 495.557   1
  -5  -1  -8 7566.24 775.352   2
  -5   1   8 8645.77 816.589   1
   5  -1   7 14629.6 646.548   1
   5   1  -7 12224.0 507.368   3
  -5  -1  -7 13722.2 1024.21   2
  -5   1   7 13613.9 994.780   1
  -5  -1  -7 13741.2 584.582   1
   5  -1   6 45772.1 1195.51   1
  -5  -1  -6 42859.4 1783.18   2
  -5  -1  -6 44595.8 1101.66   1
   5  -1   6 43600.8 1638.13   2
  -5   1   6 45243.9 1765.47   1
   5  -1   5 4909.75 571.353   2
  -5  -1  -5 4636.46 384.682   1
  -5   1   5 4957.94 611.349   1
  -5  -1  -5 4262.37 573.942   2
   5  -1   5 5142.21 431.006   1
   5  -1   4 687.661 254.962   2
  -5  -1  -4 679.160 179.235   1
   5  -1   4 760.630 188.609   1
  -5  -1  -4 488.079 237.666   2
  -5   1   4 496.169 216.393   1
   5  -1   3 1123.57 308.355   2
  -5   1   3 1934.39 411.012   1
  -5  -1  -3 1188.91 242.618   1
   5  -1   3 1208.23 239.668   1
  -5  -1  -2 12368.2 714.969   1
   5  -1   2 13314.6 773.303   1
   5  -1   2 12816.3 865.562   2
  -5   1   2 11898.3 829.652   1
   5   1  -1 8256.29 754.522   2
  -5  -1  -1 8024.06 603.515   1
   5  -1   1 8520.41 643.708   1
   5  -1   1 8063.04 692.674   2
  -5   1   1 8172.34 724.489   1
   5  -1   0 348.981 181.648   2
  -5  -1   0 889.765 265.569   1
   5  -1   0 905.581 253.341   1
   5   1   0 87.4932 168.532   2
  -5  -1   1 8364.94 665.191   1
   5   1   1 7577.22 705.753   2
   5  -1  -1 8174.61 683.629   1
  -5  -1   2 13076.9 849.394   1
   5  -1  -2 11823.7 834.182   1
   5   1   2 10888.8 850.317   2
   5   1   3 3018.35 455.784   2
  -5  -1   3 3776.13 511.173   1
   5  -1  -3 3424.96 479.299   1
   5   1   4 490.174 239.989   2
  -5  -1   4 634.436 244.364   1
   5  -1  -4 450.452 231.421   1
   5  -1  -4 452.529 177.569   3
   5   1   5 4246.38 578.864   2
  -5  -1   5 4358.82 564.237   1
   5  -1  -5 4537.47 462.729   3
   5  -1  -5 4126.05 561.211   1
  -5   1  -5 4158.34 531.851   2
   5  -1  -6 44639.5 1389.48   3
   5  -1  -6 44423.9 1775.89   1
  -5  -1   6 44577.6 1748.36   1
  -5   1  -6 44174.2 1712.22   2
   5   1   6 47091.2 1799.78   2
   5  -1  -7 12152.0 965.218   1
   5  -1  -7 12011.0 724.953   3
  -5  -1   7 11952.3 959.052   1
  -5   1  -7 11802.1 896.150   2
   5  -1  -8 8632.33 602.764   3
   5  -1  -8 7893.66 796.753   1
  -5  -1   8 8997.39 852.019   1
  -5   1  -8 7963.08 746.308   2
  -5   1  -9 24772.0 1338.22   2
  -5  -1   9 26106.6 1460.39   1
   5  -1  -9 26343.4 1038.60   3
   5  -1  -9 25687.1 1472.13   1
   5  -1 -10 286.978 142.937   3
  -5   1 -10 269.851 210.970   2
  -5  -1  10 765.821 379.137   1
   5  -1 -11 2770.39 354.891   3
  -5   1 -11 1768.92 405.458   2
  -5  -1  11 2305.49 521.153   1
  -5  -1  12 9138.61 953.478   1
  -5   1 -12 7310.45 792.097   2
   5  -1 -12 7609.84 581.692   3
   5  -1 -13 187.898 158.860   3
  -5  -1  13 481.000 289.810   1
   5  -1 -14 320.316 160.911   3
  -5  -1  14 22.9690 264.830   1
   5  -1 -15 26768.4 1138.27   3
  -5  -1  15 28542.3 1748.02   1
   5  -1 -16 3465.03 429.439   3
  -5  -1  16 3963.72 753.908   1
  -5  -1  17 2157.17 608.290   1
  -5  -1  18 25635.9 848.220   3
  -5  -1  18 25952.5 1780.27   1
  -5  -1  19 7107.68 987.812   1
  -5  -1  19 7436.66 495.311   3
  -5  -1  20 1228.97 233.809   3
  -5  -1  20 1991.61 617.169   1
  -5  -1  21 1443.30 258.438   3
  -5  -1  21 1600.64 581.187   1
  -5  -1  22 6858.54 1034.92   1
  -5  -1  22 7893.45 617.461   3
  -5  -1  23 129.489 340.064   1
  -5  -1  23 438.751 193.965   3
  -5  -1  24 1333.92 540.035   1
  -5  -1  24 2618.84 387.615   3
  -5  -1  25 4354.18 885.109   1
  -5  -1  26 4054.07 854.943   1
  -5  -1  27 4316.04 933.762   1
  -5  -1  28 1698.78 629.772   1
  -5  -1  29 2198.75 654.894   1
  -5  -1  30 2055.97 639.354   1
  -5  -1  31 1730.57 698.049   1
  -5  -1  32 608.470 519.319   1
  -5   2  28 6700.25 923.570   3
  -5   2  27 7726.04 978.596   3
  -5   2  26 1711.26 468.184   3
  -5   2  25 6044.58 854.230   3
  -5   2  24 10007.7 1033.60   3
  -5   2  23 3238.47 599.947   3
  -5   2  22 6749.44 818.393   3
  -5   2  22 6312.27 951.350   1
  -5   2  21 13536.2 1092.20   3
  -5   2  21 12670.7 1245.93   1
  -5   2  20 4805.03 765.565   1
  -5   2  20 4665.56 659.670   3
   5  -2  19 178.003 69.9807   1
  -5   2  19 273.788 300.349   1
  -5   2  18 7173.86 932.007   1
  -5   2  18 7766.17 786.062   3
  -5   2  17 2949.48 612.484   1
  -5   2  17 2684.70 469.167   3
  -5   2  16 106.329 175.304   3
  -5   2  16 215.099 336.077   1
  -5   2  15 14854.4 989.852   3
  -5   2  15 14646.0 1197.26   1
  -5   2  14 360.650 309.256   1
  -5   2  14 203.938 245.785   3
  -5   2  13 2622.46 528.708   1
  -5   2  13 2292.12 401.068   3
  -5   2  12 15628.0 965.242   3
  -5   2  12 14173.3 1133.57   1
  -5   2  11 3561.26 477.026   3
  -5   2  11 3772.88 636.256   1
  -5  -2 -10 5056.36 293.522   1
  -5   2  10 6408.76 774.759   1
  -5  -2  -8 1163.03 345.953   2
  -5  -2  -7 4509.15 604.412   2
   5  -2   7 4182.73 420.372   1
  -5  -2  -6 23251.7 1353.25   2
   5  -2   6 23961.4 980.488   1
  -5  -2  -5 6318.27 717.558   2
   5  -2   5 6137.35 605.439   2
   5  -2   5 7035.16 564.359   1
   5  -2   4 609.563 253.819   2
   5  -2   4 509.618 231.627   1
  -5  -2  -4 152.085 184.756   2
   5  -2   3 28585.3 1250.92   2
   5  -2   3 27559.0 1139.76   1
   5  -2   2 8937.57 697.335   2
   5  -2   2 9279.16 704.809   1
   5  -2   1 1667.23 344.216   1
   5   2  -1 1667.56 380.470   2
   5  -2   1 1712.76 299.432   2
   5  -2   0 22545.8 1091.41   2
   5   2   0 23907.8 1276.60   2
   5  -2   0 24716.9 1205.62   1
   5  -2  -1 1758.99 365.862   1
   5   2   1 1328.99 345.510   2
   5   2   2 7971.22 732.702   2
   5  -2  -2 8988.77 754.048   1
   5  -2  -3 29053.1 1307.22   3
   5   2   3 30792.5 1437.74   2
   5  -2  -3 26230.1 1313.07   1
   5  -2  -4 642.734 287.192   1
   5   2   4 752.851 297.850   2
   5  -2  -4 309.267 165.393   3
   5  -2  -5 7542.62 654.141   3
  -5  -2   5 7504.36 746.608   1
  -5   2  -5 7583.24 684.891   2
   5  -2  -5 7724.61 761.776   1
   5   2   5 8601.52 796.049   2
  -5  -2   6 21865.2 1298.28   1
   5  -2  -6 21273.1 1080.92   3
  -5   2  -6 22393.4 1183.22   2
   5  -2  -6 20854.2 1236.67   1
   5   2   6 21501.9 1250.60   2
  -5  -2   7 4805.74 645.227   1
   5   2   7 4102.42 596.041   2
   5  -2  -7 4552.25 508.899   3
  -5   2  -7 4542.39 555.208   2
   5  -2  -7 5292.83 649.734   1
  -5   2  -8 1439.79 332.902   2
   5  -2  -8 1488.27 412.199   1
   5  -2  -8 1780.75 339.704   3
  -5  -2   9 16936.2 1211.70   1
   5  -2  -9 15698.7 925.850   3
  -5   2  -9 15562.8 1038.82   2
  -5  -2  10 7219.63 825.202   1
  -5   2 -10 7389.39 745.054   2
   5  -2 -10 6928.80 620.515   3
   5  -2 -11 3124.59 430.936   3
  -5  -2  11 3603.28 635.574   1
  -5   2 -11 2964.57 477.404   2
  -5   2 -12 10195.7 896.399   2
  -5  -2  12 12397.1 1130.06   1
   5  -2 -12 10847.6 782.097   3
  -5  -2  13 4879.44 722.643   1
  -5   2 -13 3454.02 548.142   2
   5  -2 -13 4018.82 499.741   3
  -5  -2  14 713.333 373.116   1
   5  -2 -14 302.632 156.362   3
   5  -2 -15 14796.6 959.366   3
  -5  -2  15 14145.3 1312.27   1
  -5  -2  16 360.768 363.641   1
   5  -2 -16 160.046 183.358   3
  -5  -2  17 2483.63 640.174   1
   5  -2 -17 3199.23 486.542   3
   5  -2 -18 6297.99 674.102   3
  -5  -2  18 6492.84 974.894   1
  -5  -2  19 407.408 347.825   1
  -5  -2  20 4073.05 815.442   1
  -5  -2  21 11237.8 1298.75   1
  -5  -2  22 2163.52 229.218   3
  -5  -2  22 5337.83 958.182   1
  -5  -2  23 2430.11 696.237   1
  -5  -2  23 643.382 179.319   3
  -5  -2  24 11592.8 1420.06   1
  -5  -2  25 4202.38 856.712   1
  -5  -2  26 574.108 413.120   1
  -5  -2  27 5977.25 1095.54   1
  -5  -2  28 2081.03 690.977   1
  -5  -2  29 2372.08 727.423   1
  -5  -2  30 3454.95 932.766   1
   5   2  31 333.537 388.764   3
  -5  -2  31 1399.48 639.873   1
  -5  -2  32 360.781 583.760   1
   5   2  32-194.145 425.885   3
  -5   3  28 4859.12 847.834   3
  -5   3  27 114.635 254.612   3
  -5   3  26 68.3479 239.775   3
  -5   3  25 674.066 427.820   3
  -5   3  24 7394.22 916.111   3
  -5   3  23-291.214 301.867   3
  -5   3  22 1229.04 403.205   3
   5  -3  22 794.063 205.493   1
  -5   3  21 18827.5 1386.09   3
  -5   3  20 295.031 277.856   3
  -5   3  19 335.188 261.420   3
  -5   3  18 3764.29 600.719   3
  -5   3  17 5144.57 692.201   3
  -5   3  16 12297.4 1011.08   3
  -5   3  15 12311.3 1000.37   3
  -5  -3 -15 7155.13 363.593   1
  -5   3  14 1123.19 362.340   3
  -5   3  13-39.8278 241.734   3
  -5   3  12 5760.60 657.537   3
  -5   3  11 604.515 239.191   3
  -5   3  10 2970.36 493.331   3
   5   3  -6 13874.9 495.215   3
  -5  -3  -5 3536.80 526.471   2
   5   3  -5 3754.72 293.789   3
   5   3  -4 13277.5 594.026   3
  -5  -3  -4 12355.2 1007.30   2
   5  -3   4 13944.7 844.582   2
   5   3  -3 58356.3 1334.03   3
   5  -3   3 57570.1 1696.60   2
   5  -3   2 2668.75 373.916   2
   5   3  -2 3044.45 351.088   3
   5   3  -2 2492.49 472.029   2
   5  -3   1 857.352 310.977   1
   5   3  -1 750.214 251.743   2
   5  -3   1 629.957 176.834   2
   5  -3   0 20786.8 998.346   2
   5   3   0 22900.3 1285.05   2
   5  -3   0 21231.5 1169.85   1
   5  -3  -1 842.138 251.815   1
   5  -3  -1 1295.12 373.559   3
   5   3   1 1706.21 384.496   2
   5   3   2 3735.04 554.319   2
   5  -3  -2 3702.54 524.374   1
   5  -3  -2 2818.93 452.668   3
   5  -3  -3 60374.8 2028.72   3
   5   3   3 64965.5 2155.65   2
   5  -3  -3 61399.3 2112.62   1
   5  -3  -4 12720.6 925.701   3
   5   3   4 14199.7 1018.61   2
   5  -3  -4 14400.0 1041.45   1
   5   3   5 3608.69 531.966   2
   5  -3  -5 2882.89 448.149   3
   5  -3  -5 3465.60 549.464   1
   5  -3  -6 15568.0 1027.19   3
  -5   3  -6 15664.2 956.193   2
   5   3   6 14044.3 1031.16   2
   5  -3  -6 14673.4 1085.65   1
   5  -3  -7 7229.64 689.699   3
  -5   3  -7 7740.19 697.874   2
  -5   3  -8 8269.01 738.780   2
   5  -3  -8 7884.20 736.256   3
  -5   3  -9 27717.6 1361.45   2
   5  -3  -9 27290.5 1364.76   3
   5  -3 -10 2602.73 444.246   3
  -5   3 -10 2687.16 458.632   2
   5  -3 -11 115.567 196.534   3
  -5   3 -11 69.9958 173.193   2
  -5   3 -12 4205.13 577.513   2
   5  -3 -12 4111.39 549.096   3
   5  -3 -13 134.261 173.829   3
  -5   3 -13 455.910 251.770   2
   5  -3 -14 477.477 195.360   3
  -5   3 -14 695.117 264.429   2
  -5  -3  14 140.143 343.087   1
  -5  -3  15 11052.3 1203.33   1
   5  -3 -15 10741.8 909.440   3
   5  -3 -16 9933.02 885.016   3
  -5  -3  16 11149.9 1215.75   1
   5  -3 -17 5232.04 657.948   3
  -5  -3  17 5034.08 875.976   1
  -5  -3  18 4350.45 809.967   1
   5  -3 -18 4280.08 614.130   3
  -5  -3  19 1431.50 485.497   1
  -5  -3  20-263.962 369.682   1
  -5  -3  21 14728.1 1558.74   1
  -5  -3  22 2203.40 764.636   1
  -5  -3  23 105.148 443.078   1
  -5  -3  24 6623.30 1143.09   1
  -5  -3  25 451.070 446.583   1
   5   3  25 85.6339 354.276   3
   5   3  26 83.5472 369.390   3
  -5  -3  26 577.688 474.278   1
   5   3  27 209.591 519.806   3
  -5  -3  27 983.343 523.896   1
   5   3  28 6779.15 1195.51   3
  -5  -3  28 2551.05 772.317   1
   5   3  29 4033.21 962.803   3
  -5  -3  29 2495.03 791.696   1
   5   3  30 128.723 432.318   3
  -5  -3  30 638.052 602.964   1
   5   3  31 1265.86 656.334   3
  -5  -3  31 1687.34 672.989   1
  -5   4  30 2697.50 741.922   3
  -5   4  29 696.929 490.913   3
  -5   4  28 1338.55 583.222   3
  -5   4  27 553.463 435.067   3
  -5   4  26 3411.86 736.751   3
  -5   4  25 7030.08 1016.94   3
  -5   4  24 6639.51 952.931   3
  -5   4  23 2971.90 654.917   3
  -5   4  22-105.116 314.973   3
  -5   4  21 2125.28 550.004   3
  -5   4  20 3958.87 687.451   3
  -5   4  19 4072.14 696.457   3
  -5  -4 -18 5957.51 450.902   1
  -5   4  18 6227.42 823.739   3
  -5   4  17 526.064 286.734   3
  -5  -4 -17 225.986 129.523   1
  -5   4  16 306.046 265.381   3
  -5   4  15 3386.56 611.083   3
  -5   4  14 1151.93 417.073   3
  -5   4  13 8053.16 855.211   3
  -5   4  12 26549.4 1493.62   3
  -5   4  11 72.9496 188.591   3
  -5   4  10 1600.25 423.483   3
  -5   4   9 15013.7 1112.76   3
   5   4  -8 3187.09 205.596   3
   5   4  -7 5401.91 322.223   3
   5   4  -6 3934.89 318.962   3
   5   4  -5 10469.3 559.261   3
   5   4  -4 3951.41 382.410   3
   5   4  -3 7646.14 826.664   2
   5  -4   3 5468.34 501.226   2
   5   4  -3 6927.87 515.912   3
   5  -4   2 1583.44 270.857   2
   5   4  -2 1716.46 287.201   3
   5   4  -2 1635.90 405.113   2
   5   4  -1 9977.88 674.286   3
   5  -4   1 10690.8 1020.69   3
   5   4  -1 10295.9 898.802   2
   5  -4   1 8594.12 606.868   2
   5   4   0 58807.2 1672.18   3
   5   4   0 56173.1 2047.81   2
   5  -4   0 57622.9 1571.93   2
   5  -4   0 56207.8 2249.20   3
   5   4   1 8638.96 679.782   3
   5  -4  -1 8686.70 858.509   3
   5  -4  -1 8100.90 597.639   2
   5   4   1 9149.10 837.695   2
   5   4   2 1778.34 405.822   2
   5   4   2 2141.68 372.299   3
   5  -4  -2 1682.64 407.328   3
   5   4   3 6770.87 638.694   3
   5  -4  -3 6232.03 704.922   3
   5   4   3 6461.29 708.692   2
   5  -4  -3 6308.99 722.234   1
   5  -4  -4 2972.18 548.882   1
   5   4   4 3715.77 551.222   2
   5   4   4 2987.92 439.523   3
   5  -4  -4 3158.84 500.449   3
   5   4   5 9235.30 784.079   3
   5  -4  -5 10339.2 905.579   3
   5   4   5 9040.07 831.263   2
   5   4   6 5500.22 630.204   3
   5   4   6 5214.32 648.914   2
   5  -4  -6 5227.22 678.783   3
  -5   4  -7 7561.36 658.011   2
   5   4   7 7871.96 794.117   3
   5  -4  -7 7703.46 780.479   3
   5   4   8 5461.62 701.545   3
  -5   4  -8 4348.75 528.986   2
   5  -4  -8 3979.02 573.630   3
   5   4   9 17995.2 1217.82   3
  -5   4  -9 18391.3 1092.12   2
   5  -4  -9 18594.5 1218.98   3
   5  -4 -10 1318.54 327.092   3
  -5   4 -10 1420.01 324.471   2
   5   4  10 1368.85 390.242   3
   5  -4 -11 109.399 190.752   3
  -5   4 -11 88.7168 203.231   2
   5   4  11 443.913 311.989   3
   5   4  12 25375.2 1548.41   3
  -5   4 -12 23005.6 1285.77   2
   5  -4 -12 22410.0 1371.05   3
  -5   4 -13 6609.78 722.660   2
   5   4  13 8607.40 948.231   3
   5   4  14-268.155 285.152   3
  -5   4 -14 261.155 216.501   2
  -5   4 -15 2945.67 508.094   2
   5   4  15 2710.60 598.016   3
   5   4  16 858.913 507.253   3
   5   4  17-76.0794 252.388   3
   5   4  18 4815.73 820.363   3
  -5  -4  18 5239.42 965.399   1
  -5  -4  19 4107.88 906.603   1
   5   4  19 4398.43 816.929   3
  -5  -4  20 3680.33 862.822   1
   5   4  20 1885.76 490.830   3
   5   4  21 2065.49 630.525   3
  -5  -4  21 2539.14 719.961   1
  -5  -4  22 605.603 400.924   1
   5   4  22 90.8805 391.909   3
   5   4  23 1755.92 623.204   3
  -5  -4  23 1661.58 696.974   1
  -5  -4  24 6564.41 1207.67   1
   5   4  24 8616.27 1209.01   3
  -5  -4  25 5112.23 1063.32   1
   5   4  25 6006.65 1063.36   3
  -5  -4  26 2906.25 908.894   1
   5   4  26 3736.82 873.504   3
  -5  -4  27 143.914 380.464   1
   5   4  27 111.563 368.583   3
   5   4  28 599.153 549.808   3
  -5  -4  28 619.227 520.732   1
   5   4  29 382.127 366.732   3
  -5  -4  29 405.410 430.579   1
   5   4  30 2262.39 834.703   3
  -5  -4  30 2694.14 842.250   1
  -5   5  29 3008.58 782.684   3
  -5   5  28 2076.90 624.654   3
  -5   5  27 384.372 354.080   3
  -5   5  26 849.260 473.962   3
  -5   5  25 469.908 323.591   3
  -5   5  24 1795.14 561.227   3
  -5   5  23-138.216 298.907   3
  -5   5  22 491.680 358.642   3
  -5   5  21 6366.20 927.014   3
  -5   5  20 2593.17 643.965   3
  -5   5  19 397.399 283.887   3
  -5   5  18 1848.85 504.830   3
  -5   5  17 1995.36 536.391   3
  -5   5  16 6788.62 867.743   3
  -5   5  15 4252.36 681.782   3
  -5   5  14 3473.82 656.561   3
  -5   5  13 2512.13 567.506   3
  -5   5  12 16214.8 1276.09   3
  -5   5  11 2380.66 501.761   3
  -5   5  10 235.613 271.342   3
  -5   5   9 30420.7 1678.81   3
   5   5  -8 5891.70 407.757   3
   5   5  -7 403.758 149.030   3
   5   5  -6 772.321 205.000   3
   5   5  -5 5128.87 461.326   3
   5   5  -4 11632.7 1038.91   2
   5   5  -4 11855.6 717.868   3
   5   5  -3 15546.5 1172.42   2
   5   5  -3 16379.5 872.339   3
   5   5  -2 301.829 198.956   3
   5  -5   2 410.391 149.821   2
   5   5  -2-36.0893 229.399   2
   5   5  -1 6565.10 736.055   2
   5  -5   1 5069.29 440.155   2
   5   5  -1 6547.15 601.653   3
   5   5   0 1876.64 413.308   2
   5   5   0 1324.47 288.759   3
   5  -5   0 1652.94 256.126   2
   5   5   1 5115.57 634.271   2
   5  -5  -1 5401.92 461.907   2
   5   5   1 5788.89 608.123   3
   5   5   2 500.138 252.624   2
   5   5   2 862.201 283.889   3
   5   5   3 20566.5 1184.29   3
   5   5   3 20070.5 1278.24   2
   5   5   4 8947.30 794.529   3
   5   5   4 9036.10 877.559   2
   5   5   5 5002.90 623.327   3
   5   5   5 4571.52 639.224   2
   5   5   6 1084.15 349.430   3
   5   5   6 1079.76 346.582   2
   5   5   7 564.942 302.194   3
   5   5   8 4057.20 620.272   3
  -5   5  -8 4435.04 501.581   2
   5   5   9 35662.0 1754.23   3
  -5   5  -9 33911.0 1431.37   2
  -5   5 -10-38.3310 156.528   2
   5   5  10 201.416 230.821   3
  -5   5 -11 1948.06 390.818   2
   5   5  11 2313.18 563.074   3
   5   5  12 18161.6 1349.82   3
  -5   5 -12 17027.3 1104.96   2
  -5   5 -13 2436.34 438.620   2
   5   5  13 3150.19 626.992   3
  -5   5 -14 3026.36 504.622   2
   5   5  14 3060.36 629.517   3
  -5   5 -15 3951.15 582.589   2
   5   5  15 5722.76 843.527   3
   5   5  16 7215.34 935.947   3
  -5   5 -16 4788.14 662.738   2
   5   5  17 1757.07 556.517   3
   5   5  18 3248.94 693.915   3
   5   5  19 1378.96 505.621   3
   5   5  20 1831.54 550.631   3
   5   5  21 9070.81 1155.85   3
   5   5  22 15.0897 401.164   3
  -5  -5  22 403.603 468.370   1
  -5  -5  23 527.575 527.229   1
   5   5  23 716.344 428.229   3
  -5  -5  24 797.631 594.689   1
   5   5  24 1125.48 586.669   3
  -5  -5  25 674.608 466.621   1
   5   5  25 982.801 351.296   3
  -5  -5  26 76.2263 385.246   1
   5   5  26 664.623 549.170   3
  -5  -5  27 1123.86 491.809   1
   5   5  27 954.964 618.556   3
  -5  -5  28 1058.99 541.516   1
   5   5  28 4366.13 965.455   3
  -5  -5  29 2391.18 851.205   1
   5   5  29 2197.91 762.762   3
  -5   6  28 162.749 432.783   3
  -5   6  27 2478.97 701.536   3
  -5   6  26 2552.10 639.679   3
  -5   6  25 6337.93 1009.39   3
  -5   6  24 7175.39 1062.99   3
  -5   6  23 2021.00 589.230   3
  -5   6  22 3836.10 831.245   3
  -5   6  21 181.245 282.078   3
  -5   6  20 4514.32 830.529   3
  -5   6  19 1530.19 530.355   3
  -5   6  18 7186.14 980.882   3
  -5   6  17-199.881 274.527   3
  -5   6  16 632.724 448.364   3
  -5   6  15 21761.4 1571.14   3
  -5   6  14 3381.99 699.288   3
  -5   6  13 1323.45 484.854   3
  -5   6  12 16654.5 1354.16   3
  -5   6  11 241.005 356.186   3
  -5   6  10 4710.46 801.753   3
  -5   6   9 6952.88 909.358   3
   5   6  -8 3066.66 366.284   3
  -5   6   8 2368.98 511.766   3
   5   6  -7 8846.21 625.501   3
   5   6  -6 1722.98 308.591   3
   5   6  -5 861.148 250.608   2
   5   6  -5 1057.65 265.344   3
   5   6  -4 2483.16 502.305   2
   5   6  -4 2348.70 350.612   3
   5   6  -3 17297.4 1271.82   2
   5   6  -3 16853.9 979.090   3
   5   6  -2 4770.18 557.741   3
   5   6  -2 5213.23 711.033   2
   5   6  -1 7830.58 842.961   2
   5  -6   1 6238.39 428.156   2
   5   6  -1 8391.81 740.260   3
   5   6   0 29869.8 1578.94   2
   5  -6   0 26853.5 915.367   2
   5   6   0 29813.3 1411.85   3
   5   6   1 6804.27 700.979   3
   5  -6  -1 7169.42 485.127   2
   5   6   1 8308.49 835.447   2
   5   6   2 5284.70 674.898   2
   5   6   2 4536.14 592.320   3
   5  -6  -2 4594.67 405.402   2
   5   6   3 16624.8 1207.09   2
   5   6   3 18754.8 1196.51   3
   5   6   4 3218.94 526.814   3
   5   6   4 2320.01 491.431   2
   5   6   5 1217.29 354.005   3
   5   6   5 1740.92 429.190   2
   5   6   6 1220.56 393.693   3
   5   6   7 10468.6 974.102   3
   5   6   8 3424.70 606.066   3
   5   6   9 5163.33 726.760   3
  -5   6  -9 5919.44 557.039   2
   5   6  10 3883.27 665.150   3
  -5   6 -10 3506.65 468.580   2
   5   6  11 762.325 366.202   3
  -5   6 -11 626.481 249.924   2
   5   6  12 15828.2 1318.63   3
  -5   6 -12 15141.6 1012.16   2
  -5   6 -13 2002.48 381.054   2
   5   6  13 3511.59 659.908   3
  -5   6 -14 3201.04 508.553   2
   5   6  14 3769.44 698.512   3
   5   6  15 22747.6 1614.14   3
  -5   6 -15 18316.2 1192.85   2
  -5   6 -16-135.535 167.606   2
   5   6  16 319.833 309.780   3
  -5   6 -17 61.3729 198.352   2
   5   6  17 196.791 296.473   3
   5   6  18 5447.45 859.928   3
   5   6  19 892.393 456.250   3
   5   6  20 3699.76 732.092   3
   5   6  21-80.5914 385.342   3
   5   6  22 2600.65 650.030   3
   5   6  23 1784.26 556.120   3
   5   6  24 6723.86 1075.37   3
  -5  -6  24 8759.18 1466.06   1
   5   6  25 6027.83 1032.71   3
  -5  -6  25 7076.64 1391.38   1
  -5  -6  26 4136.69 1069.30   1
   5   6  26 2516.37 699.802   3
  -5  -6  27 2137.10 956.770   1
   5   6  27 2938.12 822.155   3
  -5  -6  28-381.359 433.548   1
   5   6  28-240.055 385.246   3
  -5   7  27 1082.92 512.212   3
  -5   7  26 498.708 316.805   3
  -5   7  25 583.678 381.718   3
  -5   7  24 1740.43 549.818   3
  -5   7  23 1433.59 585.445   3
  -5   7  22 785.139 373.999   3
  -5   7  21 679.244 401.088   3
  -5   7  20 3371.06 758.333   3
  -5   7  19 2399.53 653.817   3
  -5   7  18 10008.9 1207.65   3
  -5   7  17 685.283 418.858   3
  -5   7  16-114.376 307.327   3
  -5   7  15 854.555 404.649   3
  -5   7  14 5593.52 889.458   3
  -5   7  13 5587.72 851.982   3
  -5   7  12 3091.60 664.654   3
  -5   7  11 1702.01 553.482   3
  -5   7  10 5321.63 863.781   3
  -5   7   9 3055.85 626.095   3
   5   7  -8 549.146 213.076   3
  -5   7   8 847.487 413.636   3
   5   7  -7 5372.29 568.440   3
   5   7  -6 43780.9 1599.40   3
   5   7  -6 45684.1 2222.01   2
   5   7  -5 4352.47 547.234   3
   5   7  -5 4156.91 721.630   2
   5   7  -4 1080.28 343.213   3
   5   7  -4 310.445 300.376   2
   5   7  -3 19648.0 1162.69   3
   5   7  -3 18242.2 1367.78   2
   5   7  -2 420.487 223.431   3
   5   7  -2 297.354 263.174   2
   5   7  -1 3860.19 638.176   2
   5   7  -1 3084.43 503.583   3
   5   7   0-284.639 242.440   3
   5   7   0-233.143 291.100   2
   5   7   1 3779.28 593.224   3
   5   7   1 3565.78 589.416   2
   5  -7  -1 2810.29 272.320   2
   5   7   2 1098.22 379.912   3
   5   7   2 453.363 213.095   2
   5  -7  -2 698.259 153.599   2
   5  -7  -3 20990.4 834.300   2
   5   7   3 24859.9 1500.17   2
   5   7   3 23168.6 1409.14   3
   5   7   4 305.066 258.753   3
   5   7   4 756.208 394.240   2
   5   7   5 4547.01 678.805   3
   5   7   5 4191.47 655.165   2
   5   7   6 49357.0 2146.19   3
   5   7   7 5226.16 751.021   3
   5   7   8 1252.43 446.502   3
   5   7   9 2715.52 591.897   3
   5   7  10 5623.16 800.454   3
   5   7  11 2063.82 541.165   3
  -5   7 -11 2000.62 345.508   2
   5   7  12 4377.57 738.440   3
  -5   7 -12 4986.15 558.318   2
   5   7  13 6345.26 901.968   3
  -5   7 -13 5370.08 592.273   2
   5   7  14 7752.51 994.893   3
  -5   7 -14 5648.24 627.283   2
  -5   7 -15 380.258 249.652   2
   5   7  15 1128.34 458.231   3
   5   7  16 35.2350 277.560   3
   5   7  17 747.172 344.617   3
   5   7  18 9796.19 1184.39   3
   5   7  19 3560.47 768.413   3
   5   7  20 3330.66 748.224   3
   5   7  21 2032.22 574.496   3
   5   7  22 123.764 292.192   3
   5   7  23 768.504 455.056   3
   5   7  24 1874.74 583.474   3
   5   7  25-741.855 463.700   3
   5   7  26 268.753 364.595   3
   5   7  27 1244.74 638.175   3
  -5  -7  27 986.814 620.114   1
  -5   8  25 1233.65 599.735   3
  -5   8  24 4171.68 923.717   3
  -5   8  23 1970.61 632.402   3
  -5   8  22 2834.20 759.653   3
  -5   8  21 351.835 342.804   3
  -5   8  20 1315.02 514.218   3
  -5   8  19 514.846 389.588   3
  -5   8  18 8491.59 1155.43   3
  -5   8  17 2538.90 650.713   3
  -5   8  16-67.3187 304.540   3
  -5   8  15 10409.2 1251.69   3
  -5   8  14 1473.41 596.829   3
  -5   8  13-102.075 309.991   3
  -5   8  12 248.369 397.798   3
  -5   8  11 4038.64 747.242   3
  -5   8  10 9016.65 1106.41   3
  -5   8   9 7479.91 1013.62   3
  -5   8   8 1155.52 403.736   3
   5   8  -8 2649.61 462.649   3
   5   8  -8 2338.13 589.066   2
   5   8  -7 6140.97 669.308   3
   5   8  -7 5124.09 821.190   2
   5   8  -6 1930.30 406.246   3
   5   8  -6 1896.16 475.506   2
   5   8  -5 533.444 262.565   3
   5   8  -5 309.729 275.745   2
   5   8  -4 3899.34 584.278   3
   5   8  -4 3046.20 586.562   2
   5   8  -3 13660.3 1066.22   3
   5   8  -3 11580.6 1076.91   2
   5   8  -2 851.941 335.235   2
   5   8  -2 2682.75 519.281   3
   5   8  -1 6034.35 760.109   3
   5   8  -1 6656.36 839.757   2
   5   8   0 29.7310 280.907   2
   5   8   0 372.174 267.409   3
   5   8   1 5323.29 716.792   2
   5   8   1 6075.34 797.023   3
   5   8   2 1786.09 463.752   3
   5   8   2 1264.16 391.398   2
   5   8   3 12203.1 1092.68   3
   5   8   3 10842.8 1075.54   2
   5   8   4 2769.29 554.913   3
   5   8   4 2963.11 588.638   2
   5  -8  -4 2659.11 290.592   2
   5   8   5 185.256 218.983   3
   5   8   6 2786.76 557.175   3
   5   8   7 4929.84 762.551   3
  -5  -8   7 4532.49 629.771   3
   5   8   8 1547.67 540.321   3
  -5  -8   8 1779.07 383.667   3
  -5  -8   9 8760.61 806.194   3
   5   8   9 9299.60 1073.07   3
  -5  -8  10 8416.01 790.463   3
   5   8  10 8457.86 1048.28   3
   5   8  11 3507.56 692.303   3
   5   8  12 386.322 328.801   3
   5   8  13-116.482 291.281   3
   5   8  14 1072.02 501.151   3
   5   8  15 7099.87 1005.28   3
   5   8  16 213.362 358.507   3
   5   8  17 3420.67 721.905   3
   5   8  18 10194.6 1215.33   3
   5   8  19 393.247 369.742   3
   5   8  20 1736.38 606.008   3
   5   8  21-125.122 325.023   3
   5   8  22 3977.58 835.135   3
   5   8  23 2016.65 596.187   3
   5   8  24 2055.41 697.495   3
   5   8  25 783.545 589.438   3
  -5   9  23 1.95913 329.823   3
  -5   9  22 987.648 517.799   3
  -5   9  21 1392.19 641.367   3
  -5   9  20 1902.41 659.398   3
  -5   9  19 4537.24 957.030   3
  -5   9  18 5234.98 977.048   3
  -5   9  17 250.856 389.249   3
  -5   9  16 1236.30 522.755   3
  -5   9  15 654.165 311.576   3
  -5   9  14 2979.68 685.619   3
  -5   9  13 75.4263 338.138   3
  -5   9  12 1260.66 468.711   3
  -5   9  11 1272.54 498.037   3
  -5   9  10 1275.99 526.021   3
   5   9 -10 295.966 300.525   2
  -5   9   9 4938.95 922.796   3
   5   9  -9 5901.48 873.709   2
   5   9  -8 24.8047 351.426   2
   5   9  -7 288.175 238.689   3
   5   9  -7 220.726 293.145   2
   5   9  -6 9478.68 1080.32   2
   5   9  -6 9930.90 942.156   3
   5   9  -5 1409.15 383.542   3
   5   9  -5 755.358 290.421   2
   5   9  -4 312.428 288.925   2
   5   9  -4 383.613 279.804   3
   5   9  -3 3160.24 595.439   2
   5   9  -3 2813.37 552.594   3
   5   9  -2 2094.86 528.511   2
   5   9  -2 3414.20 631.681   3
   5   9  -1 3461.29 628.452   2
   5   9  -1 2684.48 565.572   3
   5   9   0 1802.79 476.092   2
   5   9   0 2029.21 498.309   3
   5   9   1 2716.48 580.556   2
   5   9   1 2426.78 556.977   3
   5   9   2 2437.82 565.240   2
   5   9   2 2848.21 632.289   3
   5   9   3 2241.19 534.808   3
   5   9   4 290.166 319.099   3
   5   9   5 893.231 449.751   3
  -5  -9   6 9310.82 989.126   3
   5   9   6 11482.7 1175.09   3
   5   9   7 507.647 340.207   3
  -5  -9   7 316.626 289.606   3
   5   9   8 532.553 340.994   3
   5   9   9 3263.80 630.706   3
   5   9  10 1159.59 434.094   3
   5   9  11 1860.18 574.593   3
   5   9  12 2174.42 633.818   3
   5   9  13 834.416 475.324   3
   5   9  14 3652.95 793.980   3
   5   9  15 1279.87 507.564   3
   5   9  16 2707.56 715.158   3
   5   9  17 1519.95 537.492   3
   5   9  18 5194.45 955.389   3
   5   9  19 4336.58 861.736   3
   5   9  20 2397.18 733.016   3
   5   9  21 3031.78 736.148   3
   5   9  22 1471.23 589.247   3
   5   9  23 745.030 505.593   3
  -5  10  20 578.503 497.557   3
  -5  10  19 311.012 343.803   3
  -5  10  18 3671.85 878.804   3
  -5  10  17 3586.59 896.246   3
  -5  10  16 1123.98 600.017   3
  -5  10  15 3622.50 853.775   3
  -5  10  14 1304.40 511.033   3
  -5  10  13 2363.40 737.564   3
  -5  10  12 5858.07 981.516   3
   5  10 -12 5216.19 939.958   2
  -5  10  11 2024.21 675.336   3
   5  10 -11 1648.47 565.906   2
   5  10 -10 2162.43 660.049   2
  -5  10  10 2347.70 742.734   3
   5  10  -9 2158.28 597.057   2
   5  10  -8 573.998 400.374   2
   5  10  -7 1351.27 458.286   3
   5  10  -7 1548.12 508.894   2
   5  10  -6 184.578 282.468   2
   5  10  -6 1340.31 398.875   3
   5  10  -5 2680.34 598.449   2
   5  10  -5 2918.76 568.012   3
   5  10  -4 1379.80 446.179   2
   5  10  -4 1794.95 522.561   3
   5  10  -3 1913.19 462.446   2
   5  10  -3 3117.29 622.860   3
   5  10  -2 1363.41 462.733   2
   5  10  -2 2613.91 596.062   3
   5  10  -1 4051.18 686.184   2
   5  10  -1 6048.28 879.993   3
   5  10   0 6696.16 897.980   2
   5  10   0 9478.97 1075.20   3
   5  10   1 4553.12 718.729   2
   5  10   1 5810.45 848.029   3
   5  10   2 3243.69 671.352   3
   5  10   3 3367.56 698.371   3
   5  10   4 1245.83 506.217   3
   5  10   5 2734.54 621.381   3
   5  10   6 1158.62 436.618   3
   5  10   7 829.153 334.984   3
   5  10   8 778.949 372.078   3
   5  10   9 2023.90 610.839   3
   5  10  10 2380.57 645.847   3
   5  10  11 2228.04 591.272   3
   5  10  12 6828.48 1028.72   3
   5  10  13 2211.32 651.568   3
   5  10  14 607.288 494.538   3
   5  10  15 3274.57 728.128   3
   5  10  16 778.732 452.882   3
   5  10  17 1886.18 644.822   3
   5  10  18 4808.40 953.236   3
   5  10  19 289.803 400.329   3
   5  10  20 1151.23 450.033   3
  -5  11  16 4480.48 926.511   3
  -5  11  15-166.273 456.945   3
  -5  11  14 789.502 535.108   3
   5  11 -14 805.945 456.148   2
  -5  11  13-57.8884 442.558   3
   5  11 -13-903.231 480.612   2
  -5  11  12 574.146 496.907   3
   5  11 -12 547.882 385.987   2
  -5  11  11 3682.16 855.533   3
   5  11 -11 3178.74 758.748   2
   5  11 -10-157.209 284.161   2
   5  11  -9 3393.60 707.833   2
   5  11  -8 478.951 287.117   2
   5  11  -7-31.3437 293.387   2
   5  11  -6 1817.82 516.300   2
   5  11  -6 2128.58 563.386   3
   5  11  -5 209.467 329.980   2
   5  11  -5 889.925 338.261   3
   5  11  -4 2317.41 532.399   2
   5  11  -4 1716.36 490.901   3
   5  11  -3 5518.17 817.014   2
   5  11  -3 5319.85 845.103   3
   5  11  -2 462.910 400.454   2
   5  11  -2 420.484 348.460   3
   5  11  -1 962.712 396.175   2
   5  11  -1 802.538 425.789   3
   5  11   0 2358.13 592.341   3
   5  11   1-141.587 260.167   3
   5  11   2 1129.03 509.127   3
   5  11   3 5161.92 871.340   3
   5  11   4 3044.72 712.095   3
   5  11   5 925.075 538.412   3
   5  11   6 2654.97 714.252   3
   5  11   7-156.231 313.876   3
   5  11   8 2206.06 662.899   3
   5  11   9 5120.32 954.708   3
   5  11  10 601.208 469.034   3
   5  11  11 3205.73 751.320   3
   5  11  12 1148.24 609.675   3
   5  11  13 211.214 370.562   3
   5  11  14 1502.34 638.161   3
   5  11  15 1108.57 564.922   3
   5  11  16 5653.42 1021.97   3
   5  12  -8 519.855 381.153   2
   5  12  -6 383.763 348.501   2
   5  12  -5 1668.96 616.162   2
   5  12  -4 4639.51 827.954   2
   5  12  -4 5195.69 861.388   3
   5  12  -3 510.671 474.975   2
   5  12  -3 717.473 441.477   3
   5  12  -2 908.290 411.200   3
   5  12  -1 2385.87 608.327   3
   5  12   0 5193.51 906.370   3
   5  12   1 4412.96 872.993   3
   5  12   2 302.586 270.316   3
   5  12   3 665.720 475.676   3
   5  12   4 6751.77 1048.15   3
   5  12   5 1635.74 575.699   3
   5  12   6 132.807 387.489   3
   5  12   7 1653.03 543.275   3
   5  12   8 997.680 499.743   3
   5  12   9 917.683 597.809   3
   5  12  10 947.599 485.382   3
   5  12  11 211.880 415.834   3
   6   0   0 72362.5 2283.73   2
  -6   0   0 77072.4 2123.86   1
  -6   0   1 3950.31 529.154   1
   6   0  -1 3258.91 539.126   2
   6   0   1 4171.68 566.064   2
  -6   0  -1 3616.41 475.824   1
   6   0   2-7.38967 223.492   2
  -6   0  -2-219.996 195.891   1
  -6   0   2 114.518 187.613   1
   6   0   3 3621.68 542.666   2
  -6   0   3 2318.68 430.767   1
  -6   0  -3 3239.41 429.798   1
   6   0   4 640.353 259.672   2
  -6   0   4 602.672 286.951   1
  -6   0  -4 336.702 150.946   1
   6   0   5 882.623 311.795   2
  -6   0   5 1426.67 392.172   1
   6   0  -6 17218.5 871.904   3
  -6   0  -6 17581.3 1211.47   2
  -6   0   6 17328.3 1161.80   1
   6   0   6 19235.6 1250.25   2
  -6   0  -7 14602.7 1134.29   2
   6   0  -7 13415.1 744.878   3
  -6   0   7 15190.2 1116.50   1
   6   0   7 13656.7 1049.35   2
  -6   0   8 272.555 276.964   1
   6   0  -8 36.6852 111.304   3
  -6   0   9-100.887 245.969   1
   6   0  -9 53.4912 117.970   3
  -6   0  10 249.325 290.922   1
   6   0 -10 274.073 154.683   3
   6   0 -11 6120.65 450.882   3
  -6   0  11 6337.44 822.238   1
  -6   0  12 16853.1 1301.81   1
   6   0 -12 16236.7 726.197   3
  -6   0  13 3619.12 624.784   1
   6   0 -13 3201.60 335.185   3
  -6   0  14 1721.26 517.169   1
   6   0 -14 1571.41 232.414   3
  -6   0  15 956.165 504.655   1
   6   0 -15 953.118 199.037   3
  -6   0  16 18173.0 1475.73   1
  -6   0  17 17785.5 1511.33   1
  -6   0  18 2308.32 595.703   1
  -6   0  19 376.486 435.195   1
  -6   0  20 878.102 318.521   1
  -6   0  21-246.810 440.446   1
  -6   0  22 389.600 391.709   1
  -6   0  22 932.016 281.486   3
  -6   0  23 1794.37 344.480   3
  -6   0  23 1161.95 534.027   1
  -6   0  24 16973.5 1660.60   1
  -6   0  25 11963.2 1423.54   1
  -6   0  26 2036.46 713.559   1
  -6   0  27 132.124 423.097   1
  -6   0  28 897.605 525.085   1
  -6   0  29-273.237 367.368   1
  -6   0  30 3113.23 903.189   1
  -6   0  31 117.027 447.502   1
  -6   1  31 3317.24 842.485   1
  -6   1  30 389.986 395.699   1
  -6   1  29 5477.85 1066.20   1
  -6   1  28 1855.74 670.390   1
  -6   1  27 98.1323 478.656   1
  -6   1  26 487.286 547.231   1
  -6   1  25-104.711 296.074   1
  -6   1  24 3797.65 807.719   1
  -6   1  24 4030.37 641.689   3
  -6   1  23-28.4315 284.210   1
  -6   1  23 818.907 334.764   3
  -6   1  22 2717.25 473.788   3
  -6   1  22 3417.87 785.761   1
  -6   1  21 23488.1 1313.11   3
  -6   1  21 23847.9 1819.41   1
  -6   1  20 556.640 239.956   3
  -6   1  20 17.7310 335.111   1
  -6   1  19 2233.48 595.108   1
  -6   1  19 1486.62 343.756   3
  -6   1  18 5433.13 843.087   1
  -6   1  17 1044.27 447.581   1
  -6   1  16 5478.40 830.653   1
  -6   1  15 15729.9 1339.39   1
  -6   1  14 3533.31 674.869   1
  -6   1  13 3090.34 631.048   1
   6   1 -12 1590.34 146.522   3
  -6   1  12 3983.06 651.545   1
   6   1 -11 1111.97 142.954   3
  -6   1  11 2999.69 575.677   1
  -6   1  10 5414.25 746.254   1
   6   1 -10 2929.07 235.980   3
   6  -1   9 21248.0 790.732   1
  -6   1   9 21420.7 1391.88   1
  -6   1   8 5029.32 677.370   1
   6  -1   8 4948.64 414.247   1
   6   1  -8 3573.09 321.160   3
  -6  -1  -8 3877.48 344.857   1
   6  -1   7 2589.14 305.681   1
   6   1  -7 2935.48 308.485   3
  -6   1   7 3726.55 606.469   1
  -6  -1  -7 3241.05 334.883   1
   6  -1   6 7720.98 567.166   1
  -6  -1  -6 7071.05 531.682   1
   6  -1   6 7299.42 746.932   2
  -6   1   6 7834.89 802.165   1
  -6  -1  -5 810.622 213.732   1
   6  -1   5 1203.19 255.520   1
   6  -1   5 371.955 216.222   2
  -6   1   5 1001.72 381.843   1
   6  -1   4 21861.7 1023.72   1
  -6  -1  -4 22357.4 996.551   1
  -6   1   4 23074.9 1331.65   1
   6  -1   4 21575.6 1251.93   2
  -6  -1  -3 43049.3 1414.72   1
   6  -1   3 43945.6 1496.83   1
   6  -1   3 45753.1 1787.94   2
  -6   1   3 49016.0 1875.89   1
   6  -1   2 4205.33 548.244   2
   6  -1   2 4906.59 539.978   1
  -6  -1  -2 4916.28 517.101   1
  -6   1   2 5650.94 656.439   1
   6  -1   1 1224.17 300.136   1
  -6   1   1 1414.16 344.659   1
  -6  -1  -1 1264.72 293.297   1
   6   1  -1 582.917 219.446   2
   6  -1   1 1266.33 316.544   2
   6  -1   0 163.503 176.095   1
  -6  -1   0-154.004 214.840   1
   6  -1   0-218.661 210.485   2
   6   1   0-80.8177 261.930   2
   6  -1  -1 969.100 283.003   1
  -6  -1   1 1147.18 286.331   1
   6  -1  -1 832.022 262.841   2
   6   1   1 797.642 236.421   2
   6   1   2 4714.72 586.608   2
  -6  -1   2 5931.15 649.633   1
   6  -1  -2 4851.42 588.130   1
   6  -1  -3 40671.4 1713.96   1
  -6  -1   3 40963.9 1651.69   1
   6   1   3 41168.7 1812.24   2
   6  -1  -4 23340.5 1323.27   1
  -6  -1   4 25435.2 1346.63   1
   6   1   4 25351.4 1411.77   2
   6  -1  -5 571.939 262.967   1
   6   1   5 880.632 316.094   2
  -6  -1   5 735.746 330.883   1
   6  -1  -5 672.438 231.716   3
  -6   1  -6 6712.32 743.513   2
   6  -1  -6 6002.52 570.595   3
   6  -1  -6 6192.73 720.889   1
  -6  -1   6 6586.22 736.418   1
   6   1   6 7139.98 773.693   2
   6   1   7 3362.35 581.428   2
  -6  -1   7 3232.14 566.107   1
   6  -1  -7 2996.76 416.238   3
  -6   1  -7 3342.20 552.945   2
   6  -1  -8 4167.99 487.352   3
  -6  -1   8 3948.36 633.953   1
  -6   1  -8 3034.66 532.709   2
   6  -1  -9 23569.1 1098.41   3
  -6  -1   9 23707.5 1471.06   1
  -6   1  -9 23277.6 1418.26   2
   6  -1 -10 4572.14 485.614   3
  -6  -1  10 4309.82 661.318   1
   6  -1 -11 1671.40 293.131   3
  -6  -1  11 1927.69 503.262   1
  -6  -1  12 3315.45 567.433   1
   6  -1 -12 4058.18 452.512   3
   6  -1 -13 2532.50 386.011   3
  -6  -1  13 2727.24 582.806   1
   6  -1 -14 2622.37 376.588   3
  -6  -1  14 1665.44 513.584   1
   6  -1 -15 17088.5 932.350   3
  -6  -1  15 17383.0 1433.46   1
   6  -1 -16 4115.76 473.093   3
  -6  -1  16 3621.88 718.092   1
   6  -1 -17 911.591 236.443   3
  -6  -1  17 825.738 392.007   1
  -6  -1  18 3929.93 753.273   1
  -6  -1  19 1370.51 493.495   1
  -6  -1  20 1158.70 508.223   1
  -6  -1  21 22580.5 1851.64   1
  -6  -1  22 2718.59 761.293   1
  -6  -1  23 483.096 352.728   1
  -6  -1  24 5035.83 994.859   1
  -6  -1  25 1770.75 709.538   1
  -6  -1  26 477.936 398.502   1
  -6  -1  27 1201.67 644.005   1
  -6  -1  28 657.725 581.055   1
  -6  -1  29 5428.00 1085.48   1
  -6  -1  30 600.573 550.617   1
  -6  -1  31 3693.58 971.680   1
  -6   2  25 5125.26 798.051   3
  -6   2  24 7115.36 872.692   3
  -6   2  23 1630.87 448.146   3
  -6   2  22 2640.96 531.508   3
  -6   2  21 4426.45 819.340   1
  -6   2  21 4280.01 632.631   3
  -6   2  20 2383.69 611.839   1
  -6   2  20 2167.93 447.865   3
  -6   2  19 5948.04 923.708   1
  -6   2  19 6388.80 744.826   3
  -6   2  18 1501.01 380.477   3
  -6   2  18 1680.04 495.388   1
  -6   2  17 5667.55 658.418   3
  -6   2  17 4857.74 802.575   1
  -6   2  16 1364.91 478.070   1
  -6   2  16 1697.67 396.583   3
   6  -2  15 11255.6 437.253   1
  -6   2  15 23362.1 1606.72   1
   6  -2  14 3034.44 263.014   1
  -6   2  14 3502.61 624.998   1
  -6   2  13 6137.64 817.442   1
   6  -2  13 5577.15 387.109   1
   6  -2  12 16851.3 710.255   1
  -6   2  12 15943.5 1314.20   1
   6  -2  11 6758.70 479.238   1
  -6   2  11 8120.69 923.843   1
  -6  -2 -10 4682.70 332.054   1
   6  -2  10 6386.96 493.470   1
  -6   2  10 6820.67 824.583   1
  -6  -2  -9 6481.01 422.074   1
   6  -2   9 6615.78 520.090   1
   6  -2   8 1714.90 296.766   1
  -6  -2  -8 1655.14 247.802   1
   6   2  -8 1188.30 144.589   3
  -6  -2  -7 4257.08 393.909   1
   6  -2   7 4470.35 479.745   1
  -6  -2  -6 14567.7 760.770   1
   6  -2   6 14460.5 862.378   1
   6  -2   6 14549.0 1016.00   2
  -6  -2  -5 13.8689 132.958   1
   6  -2   5 144.655 185.493   1
   6  -2   5-85.6593 181.525   2
  -6  -2  -4 721.794 229.937   1
   6  -2   4 602.364 209.332   1
   6  -2   4 778.464 290.730   2
  -6  -2  -3 24593.6 1104.13   1
   6  -2   3 24770.1 1293.93   2
   6  -2   3 23983.5 1178.76   1
  -6  -2  -2 10827.0 767.552   1
   6   2  -2 9428.77 895.919   2
   6  -2   2 10290.5 825.479   2
   6  -2   2 9939.53 804.302   1
   6  -2   1 977.345 327.028   1
  -6  -2  -1 618.924 292.422   1
   6   2  -1 546.876 305.573   2
   6  -2   1 601.814 216.236   2
  -6  -2   0 47613.9 1680.40   1
   6  -2   0 50478.1 1795.00   2
   6   2   0 47481.4 1958.68   2
   6  -2   0 47925.5 1788.94   1
  -6  -2   1 190.033 265.027   1
   6  -2  -1 212.825 166.245   2
   6  -2  -1 365.085 237.920   1
   6   2   1 866.829 342.916   2
  -6  -2   2 10745.6 858.595   1
   6   2   2 10595.0 931.219   2
   6  -2  -2 10437.7 871.822   1
   6  -2  -3 28319.6 1466.21   1
   6  -2  -3 28190.6 1473.03   3
  -6  -2   3 28303.8 1421.97   1
   6   2   3 29341.7 1545.38   2
  -6  -2   4 499.101 268.319   1
   6   2   4 966.393 332.577   2
   6  -2  -4 822.313 239.686   3
   6  -2  -4 661.232 283.608   1
  -6  -2   5 222.145 314.965   1
   6   2   5 203.559 236.777   2
   6  -2  -5 264.249 224.527   1
   6  -2  -5 261.840 186.199   3
  -6  -2   6 13917.3 1094.16   1
   6  -2  -6 12522.7 895.067   3
  -6   2  -6 12902.5 1007.71   2
   6   2   6 13084.5 1048.01   2
  -6  -2   7 4755.21 675.799   1
   6   2   7 4287.61 651.936   2
   6  -2  -7 4928.37 584.785   3
  -6   2  -7 3926.00 556.405   2
  -6  -2   8 1759.65 458.985   1
   6  -2  -8 1593.76 339.428   3
  -6   2  -8 1619.27 402.458   2
  -6  -2   9 6177.24 823.869   1
   6  -2  -9 5583.48 608.501   3
  -6   2  -9 5598.29 681.255   2
  -6  -2  10 4222.21 684.395   1
  -6   2 -10 4687.28 655.805   2
   6  -2 -10 4818.66 560.279   3
  -6  -2  11 6913.96 907.986   1
   6  -2 -11 6604.08 652.846   3
  -6  -2  12 17937.3 1412.19   1
   6  -2 -12 16866.0 1032.99   3
  -6  -2  13 7981.62 984.966   1
   6  -2 -13 7789.79 712.742   3
   6  -2 -14 2882.17 463.907   3
  -6  -2  14 4975.71 821.131   1
  -6  -2  15 24125.7 1743.74   1
   6  -2 -15 22363.9 1207.54   3
   6  -2 -16 887.819 296.181   3
  -6  -2  16 901.733 427.862   1
   6  -2 -17 5325.01 628.214   3
  -6  -2  17 4210.34 818.693   1
   6  -2 -18 1479.32 350.852   3
  -6  -2  18 1675.20 565.520   1
   6  -2 -19 6977.60 718.134   3
  -6  -2  19 7904.54 1095.55   1
  -6  -2  20 2488.76 689.747   1
  -6  -2  21 2651.74 621.346   1
  -6  -2  22 3982.88 889.672   1
  -6  -2  23 962.434 550.055   1
  -6  -2  24 6185.04 1063.05   1
  -6  -2  25 3011.17 825.205   1
  -6  -2  26-289.706 370.402   1
  -6  -2  27 2380.54 726.499   1
  -6  -2  28 1885.13 700.281   1
  -6  -2  29 311.868 529.709   1
  -6  -2  30 411.490 461.383   1
  -6   3  26 4653.63 860.292   3
  -6   3  25 1146.33 487.199   3
  -6   3  24 3727.98 718.465   3
  -6   3  23 847.696 417.081   3
  -6   3  22 4788.02 768.286   3
  -6   3  21 5389.08 773.351   3
  -6   3  20 285.536 303.277   3
  -6   3  19 10731.7 1045.46   3
  -6   3  18 23244.9 1465.84   3
  -6   3  17 387.369 280.441   3
  -6   3  16 244.480 216.314   3
  -6   3  15 4916.02 661.426   3
  -6  -3 -14 231.180 55.6169   1
  -6  -3 -13 2166.44 213.339   1
   6  -3   7 3194.22 448.721   1
   6   3  -7 1796.87 187.096   3
   6   3  -6 35402.7 911.979   3
   6  -3   6 38566.4 1492.73   1
   6  -3   5 2939.73 452.328   2
   6   3  -5 2463.37 270.441   3
   6  -3   5 3737.49 500.032   1
   6   3  -4 13854.2 682.235   3
   6  -3   4 13567.6 943.418   2
   6  -3   4 12796.6 897.544   1
   6  -3   3 5382.12 601.992   2
   6   3  -3 5244.35 720.172   2
   6  -3   3 5007.64 590.010   1
   6  -3   2 1628.56 316.653   2
   6  -3   2 1816.30 370.567   1
   6   3  -2 1840.23 459.562   2
   6   3  -1 7669.29 824.229   2
   6  -3   1 9245.24 762.148   2
   6  -3   1 9184.18 824.685   1
   6  -3   0 1837.01 377.321   2
   6  -3   0 1947.53 421.258   1
   6   3   0 1584.11 422.695   2
   6  -3  -1 8646.88 731.618   2
   6   3   1 6882.63 787.966   2
   6  -3  -1 7627.12 787.284   1
   6   3   2 1313.58 366.602   2
   6  -3  -2 1824.98 423.899   3
   6  -3  -2 1870.77 445.683   1
   6   3   3 5509.47 703.121   2
   6  -3  -3 5077.44 643.749   3
   6  -3  -3 5426.10 691.041   1
   6  -3  -4 11851.1 946.015   3
   6   3   4 12529.8 1042.03   2
   6   3   5 2241.82 434.940   2
   6  -3  -5 2542.61 445.203   3
   6  -3  -6 36754.7 1673.94   3
   6   3   6 38748.9 1854.99   2
   6   3   7 2896.84 561.294   2
  -6   3  -7 2903.13 491.352   2
   6  -3  -7 2701.12 476.915   3
  -6   3  -8 857.066 294.433   2
   6  -3  -8 701.379 272.312   3
  -6   3  -9 1481.94 384.501   2
   6  -3  -9 1060.32 352.985   3
  -6  -3   9 889.700 430.231   1
  -6   3 -10 5972.22 713.022   2
   6  -3 -10 8388.67 818.084   3
  -6  -3  10 6617.34 890.040   1
  -6  -3  11 9913.87 1092.69   1
   6  -3 -11 8843.33 836.847   3
  -6   3 -11 7826.11 826.904   2
  -6  -3  12 2011.99 562.509   1
  -6   3 -12 1550.43 403.976   2
   6  -3 -12 1716.94 377.262   3
  -6  -3  13 3298.58 706.489   1
   6  -3 -13 3588.40 565.531   3
  -6  -3  14 642.068 438.579   1
   6  -3 -14 528.284 221.083   3
  -6  -3  15 4943.71 865.562   1
   6  -3 -15 4597.22 624.430   3
  -6  -3  16-614.268 469.517   1
   6  -3 -16 286.399 256.225   3
  -6  -3  17 959.842 621.286   1
   6  -3 -17 424.496 311.597   3
   6  -3 -18 24811.5 1467.75   3
  -6  -3  18 28625.9 2083.67   1
  -6  -3  19 8497.95 1204.23   1
  -6  -3  20 1134.34 549.337   1
  -6  -3  21 5106.65 996.977   1
  -6  -3  22 4253.40 930.668   1
  -6  -3  23 668.713 525.381   1
  -6  -3  24 1832.71 641.730   1
  -6  -3  25 837.707 478.569   1
  -6  -3  26 2935.67 792.251   1
   6   3  27 540.494 493.461   3
  -6  -3  27 301.554 556.168   1
   6   3  28 999.448 633.735   3
  -6  -3  28 124.247 386.360   1
   6   3  29 4182.07 1030.44   3
  -6  -3  29 1630.22 707.500   1
  -6  -3  30 1929.23 774.479   1
   6   3  30 3807.45 993.470   3
  -6   4  27 13699.3 1429.39   3
  -6   4  26 1317.80 524.326   3
  -6   4  25 1990.04 583.483   3
  -6   4  24 337.442 363.007   3
  -6   4  23 3204.24 676.395   3
  -6   4  22 4342.53 746.282   3
  -6   4  21 5284.61 815.842   3
  -6   4  20 3723.24 665.828   3
  -6   4  19 8354.34 977.892   3
  -6   4  18 1823.96 475.798   3
  -6   4  17 173.203 324.361   3
  -6   4  16 1732.31 509.322   3
  -6   4  15 26433.1 1624.52   3
  -6   4  14 6614.10 826.973   3
   6   4  -8 683.820 101.644   3
   6   4  -7 2348.34 226.625   3
   6   4  -6 3945.77 335.517   3
   6   4  -5 3596.09 356.970   3
   6   4  -4 51.2335 115.130   3
   6  -4   4 254.135 186.330   2
   6   4  -3 46996.6 1402.83   3
   6   4  -3 50197.5 2206.24   2
   6  -4   3 44461.2 1604.35   2
   6   4  -2 5534.17 522.887   3
   6  -4   2 4806.08 535.174   2
   6   4  -2 5781.21 758.844   2
   6  -4   2 4463.78 594.641   1
   6  -4   1 297.738 163.875   2
   6   4  -1 411.216 203.360   3
   6  -4   1 83.7115 152.928   1
   6   4  -1 58.6425 218.403   2
   6   4   0 1220.57 297.873   3
   6  -4   0 696.398 264.290   1
   6  -4   0 602.901 154.640   2
   6   4   0 546.881 260.170   2
   6   4   1 66.9274 223.177   2
   6   4   1 371.460 212.306   3
   6  -4  -1 487.492 221.205   2
   6   4   2 4936.42 683.683   2
   6   4   2 4543.11 557.972   3
   6   4   3 39535.6 1600.91   3
   6   4   3 40383.5 1880.73   2
   6   4   4 27.7010 235.489   2
   6   4   4 682.068 337.448   3
   6   4   5 4307.57 671.963   2
   6   4   5 3393.03 529.415   3
   6   4   6 4835.34 696.735   2
   6   4   6 4956.56 644.666   3
   6   4   7 3881.00 621.275   2
  -6   4  -8 1905.58 401.333   2
  -6   4  -9 6895.21 754.646   2
  -6   4 -10 10863.7 962.926   2
  -6   4 -11 1176.03 365.364   2
  -6   4 -12 2874.58 537.666   2
  -6   4 -13 1489.27 389.605   2
  -6  -4  15 20197.2 1746.47   1
  -6  -4  16 1330.10 551.513   1
  -6  -4  17 420.319 354.378   1
  -6  -4  18 1421.36 633.469   1
   6   4  18 1773.26 589.671   3
  -6  -4  19 9233.33 1324.17   1
   6   4  19 9380.09 1170.86   3
  -6  -4  20 3217.79 792.796   1
   6   4  20 3613.70 774.386   3
  -6  -4  21 4107.15 957.858   1
   6   4  21 5044.43 1024.47   3
  -6  -4  22 3312.37 855.958   1
   6   4  22 3505.30 775.911   3
  -6  -4  23 2895.18 828.357   1
   6   4  23 2487.24 650.269   3
  -6  -4  24 948.327 530.948   1
   6   4  24 146.291 328.639   3
  -6  -4  25 1256.23 585.079   1
   6   4  25 2247.13 765.001   3
  -6  -4  26 872.636 580.842   1
   6   4  26 1457.89 699.835   3
   6   4  27 11255.5 1528.07   3
  -6  -4  27 9207.36 1464.75   1
   6   4  28 1530.13 751.026   3
  -6  -4  28 1927.34 875.686   1
   6   4  29 136.599 715.226   3
  -6  -4  29 343.769 519.149   1
  -6   5  28 1259.31 601.119   3
  -6   5  27 360.533 409.346   3
  -6   5  26 2622.96 709.493   3
  -6   5  25 1112.81 531.406   3
  -6   5  24 3266.17 762.946   3
  -6   5  23 764.684 491.501   3
  -6   5  22 1136.89 499.488   3
  -6   5  21 753.335 360.134   3
  -6   5  20 907.649 383.094   3
  -6   5  19 3475.83 650.058   3
  -6   5  18 13951.5 1309.97   3
  -6   5  17 561.968 394.963   3
  -6   5  16 7296.29 965.948   3
  -6   5  15 621.984 346.232   3
  -6   5  14 366.370 252.389   3
  -6   5  13 895.893 377.951   3
   6   5  -8 2735.74 268.620   3
   6   5  -7 6900.50 464.931   3
   6   5  -6 38512.0 1171.14   3
   6   5  -5 2534.67 336.696   3
   6   5  -4 59.4918 163.427   3
   6   5  -4 444.511 350.274   2
   6   5  -3 2333.30 369.977   3
   6  -5   3 2409.62 377.678   2
   6   5  -3 2206.92 523.263   2
   6  -5   2 440.999 190.385   2
   6   5  -2 641.056 204.594   3
   6   5  -2 610.763 292.586   2
   6  -5   1 5123.97 523.537   2
   6   5  -1 5479.21 757.466   2
   6   5  -1 5811.59 588.011   3
   6  -5   0 594.850 159.816   2
   6   5   0 1578.69 425.659   2
   6   5   0 1172.85 330.754   3
   6   5   1 4641.66 563.777   3
   6   5   1 4810.63 670.382   2
   6  -5  -1 5756.95 553.446   2
   6   5   2 708.975 341.250   2
   6   5   2 742.152 265.671   3
   6  -5  -2 775.016 238.938   2
   6   5   3 2804.51 545.427   2
   6   5   3 2382.00 447.861   3
   6   5   4 46.3896 267.340   2
   6   5   4 119.001 214.832   3
   6   5   5 1918.10 510.131   2
   6   5   5 3311.38 549.074   3
   6   5   6 39778.5 1818.19   3
   6   5   6 36457.2 1858.78   2
   6   5   7 8591.98 880.364   3
   6   5   8 2162.83 475.670   3
   6   5   9 17864.8 1319.01   3
  -6   5  -9 17608.8 1130.66   2
   6   5  10 4095.82 686.109   3
  -6   5 -10 3710.81 565.323   2
   6   5  11 5715.67 786.256   3
  -6   5 -11 5256.83 662.294   2
   6   5  12-30.6789 275.265   3
  -6   5 -12 156.533 217.421   2
  -6   5 -13 1583.96 404.400   2
   6   5  13 1054.91 432.856   3
  -6   5 -14 349.019 221.183   2
   6   5  14 244.387 344.727   3
   6   5  15 194.961 301.349   3
   6   5  16 8388.07 1043.72   3
   6   5  17 1026.96 420.237   3
   6   5  18 14662.1 1454.56   3
   6   5  19 3576.47 806.963   3
  -6  -5  19 3937.03 1003.30   1
  -6  -5  20 439.256 469.816   1
   6   5  20 882.327 412.259   3
  -6  -5  21 1016.41 678.484   1
   6   5  21 1056.72 523.376   3
  -6  -5  22 663.824 503.441   1
   6   5  22 741.420 512.275   3
  -6  -5  23 521.520 387.365   1
   6   5  23 2003.49 710.918   3
  -6  -5  24 2506.52 847.341   1
   6   5  24 3133.69 802.915   3
  -6  -5  25-161.999 417.872   1
   6   5  25 468.237 506.820   3
  -6  -5  26 3273.52 953.998   1
   6   5  26 2543.15 803.261   3
  -6  -5  27 4.82522 482.985   1
   6   5  27 269.106 425.950   3
  -6  -5  28 1373.42 650.280   1
   6   5  28 522.624 494.660   3
  -6   6  27 2431.46 712.747   3
  -6   6  26 220.677 333.433   3
  -6   6  25 362.862 421.386   3
  -6   6  24 4140.50 768.536   3
  -6   6  23 1876.28 597.796   3
  -6   6  22 940.286 511.850   3
  -6   6  21 5143.35 928.963   3
  -6   6  20 1534.21 531.071   3
  -6   6  19 2347.74 634.417   3
  -6   6  18 3563.12 761.920   3
  -6   6  17 567.573 401.324   3
  -6   6  16 1013.90 434.160   3
  -6   6  15 2521.45 620.811   3
  -6   6  14 2609.70 625.145   3
  -6   6  13 2323.86 614.566   3
  -6   6  12 13947.4 1327.04   3
   6   6  -8 21.5913 121.932   3
   6   6  -7 5803.18 507.953   3
   6   6  -6 976.574 249.784   3
   6   6  -5 23680.8 1671.85   2
   6   6  -5 21434.9 1042.87   3
   6   6  -4 1637.46 491.345   2
   6   6  -4 2190.60 375.175   3
   6   6  -3 18936.1 1440.37   2
   6   6  -3 18665.5 1054.30   3
   6   6  -2 1229.36 326.750   3
   6   6  -2 817.250 342.270   2
   6   6  -1 7022.56 868.084   2
   6  -6   1 7204.17 573.270   2
   6   6  -1 7453.06 722.870   3
   6   6   0 2697.11 531.444   2
   6  -6   0 2942.27 386.949   2
   6   6   0 3183.61 495.663   3
   6   6   1 6321.49 820.398   2
   6  -6  -1 5943.35 525.967   2
   6   6   1 6245.36 691.337   3
   6   6   2 730.589 353.817   2
   6   6   2 1316.53 355.154   3
   6  -6  -2 699.665 176.436   2
   6  -6  -3 16865.6 931.703   2
   6   6   3 16581.6 1283.87   2
   6   6   3 17523.1 1197.52   3
   6   6   4 1271.85 440.605   2
   6   6   4 2165.67 490.378   3
   6   6   5 21870.4 1394.65   3
   6   6   5 19778.8 1412.59   2
   6   6   6 1186.10 377.887   3
   6   6   6 1893.37 500.273   2
   6   6   7 4126.00 674.060   3
   6   6   8-59.1538 223.764   3
   6   6   9 4437.67 728.803   3
   6   6  10 7979.35 925.698   3
   6   6  11 2304.52 596.049   3
  -6   6 -11 1440.89 355.738   2
   6   6  12 15166.9 1314.72   3
  -6   6 -12 13006.2 1031.51   2
   6   6  13 3566.74 728.966   3
  -6   6 -13 2778.12 506.204   2
  -6   6 -14 2947.07 519.517   2
   6   6  14 3574.22 708.013   3
  -6   6 -15 1989.59 442.981   2
   6   6  15 3417.41 674.311   3
   6   6  16 1301.51 430.854   3
   6   6  17 510.294 390.810   3
   6   6  18 3847.73 786.343   3
   6   6  19 1971.06 600.857   3
   6   6  20 620.572 469.715   3
   6   6  21 5349.17 918.224   3
   6   6  22 1000.82 569.926   3
  -6  -6  22 1813.44 776.286   1
  -6  -6  23 2882.55 779.840   1
   6   6  23 3371.04 882.430   3
  -6  -6  24 3250.48 1005.35   1
   6   6  24 3913.19 873.775   3
  -6  -6  25 1037.66 722.060   1
   6   6  25 30.9082 385.438   3
  -6  -6  26-321.552 551.208   1
   6   6  26 72.0594 380.560   3
  -6  -6  27 2444.42 890.676   1
   6   6  27 1655.31 639.355   3
  -6   7  25 2003.73 725.680   3
  -6   7  24 216.543 363.133   3
  -6   7  23-235.175 337.123   3
  -6   7  22 1403.44 557.405   3
  -6   7  21 3694.87 798.077   3
  -6   7  20 1761.02 558.559   3
  -6   7  19 2244.05 617.454   3
  -6   7  18 3348.20 772.827   3
  -6   7  17-144.816 309.637   3
  -6   7  16 8123.97 1047.46   3
  -6   7  15-399.840 311.587   3
  -6   7  14 2967.91 642.107   3
  -6   7  13 2283.76 605.941   3
  -6   7  12 1003.27 415.154   3
   6   7  -8 10124.1 731.763   3
   6   7  -7 1026.01 269.806   3
   6   7  -7 339.724 300.416   2
   6   7  -6 6360.90 629.038   3
   6   7  -6 7192.92 984.726   2
   6   7  -5 4936.37 592.784   3
   6   7  -5 4465.18 752.730   2
   6   7  -4 1082.80 294.970   3
   6   7  -4 770.389 373.471   2
   6   7  -3 25738.9 1680.78   2
   6   7  -3 27014.6 1383.69   3
   6   7  -2 844.887 393.535   2
   6   7  -2 792.575 315.077   3
   6   7  -1 1500.73 381.518   3
   6   7  -1 1285.44 419.808   2
   6   7   0 2001.78 454.964   3
   6   7   0 2091.48 494.319   2
   6  -7   0 1878.83 289.901   2
   6   7   1 1545.80 427.305   3
   6  -7  -1 1376.21 266.684   2
   6   7   1 1014.81 385.263   2
   6   7   2 113.738 234.512   3
   6   7   2 239.923 301.221   2
   6  -7  -2 195.487 136.208   2
   6  -7  -3 22243.7 1025.67   2
   6   7   3 19229.2 1434.06   2
   6   7   3 22929.1 1469.91   3
   6   7   4 456.637 290.958   3
   6   7   4-174.581 265.545   2
   6   7   5 4780.14 717.279   3
   6   7   5 5303.30 777.368   2
   6   7   6 7587.33 878.810   3
   6   7   7 275.290 259.234   3
   6   7   8 8781.18 983.727   3
   6   7   9 17042.4 1383.49   3
   6   7  10 215.149 306.745   3
   6   7  11 797.097 400.769   3
   6   7  12 542.487 337.259   3
   6   7  13 3514.88 683.992   3
   6   7  14 1369.67 438.138   3
   6   7  15 371.746 347.785   3
   6   7  16 10105.3 1209.20   3
   6   7  17 92.6615 404.853   3
   6   7  18 3394.97 791.445   3
   6   7  19 3242.26 727.978   3
   6   7  20 2253.63 640.240   3
   6   7  21 3886.38 834.445   3
   6   7  22 910.176 441.085   3
   6   7  23 564.236 559.512   3
   6   7  24 61.5766 346.115   3
   6   7  25 1007.23 528.794   3
  -6  -7  25 946.628 726.582   1
  -6   8  23 2276.57 706.089   3
  -6   8  22-566.985 503.784   3
  -6   8  21-26.3890 347.990   3
  -6   8  20 558.623 406.546   3
  -6   8  19 422.255 391.992   3
  -6   8  18 873.080 538.041   3
  -6   8  17 3172.58 718.885   3
  -6   8  16 73.4237 353.750   3
  -6   8  15 1106.93 496.386   3
  -6   8  14 100.042 296.449   3
  -6   8  13 9913.38 1230.79   3
   6   8  -9-36.1531 357.401   2
   6   8  -8 1261.33 326.222   3
   6   8  -8 477.379 316.165   2
   6   8  -7 2499.52 441.261   3
   6   8  -7 3589.73 687.430   2
   6   8  -6 874.754 286.520   3
   6   8  -6 347.047 342.871   2
   6   8  -5 5543.50 657.219   3
   6   8  -5 4839.82 812.253   2
   6   8  -4 1129.19 342.652   3
   6   8  -4 46.8763 289.661   2
   6   8  -3 1802.34 503.207   2
   6   8  -3 2943.25 536.609   3
   6   8  -2 1033.85 413.077   2
   6   8  -2 737.869 305.041   3
   6   8  -1 6899.73 918.442   2
   6   8  -1 7920.85 869.357   3
   6   8   0 16680.7 1390.53   2
   6   8   0 17875.2 1290.72   3
   6   8   1 9252.67 1029.78   2
   6   8   1 9212.24 962.839   3
   6   8   2 924.223 364.469   3
   6  -8  -2 965.216 221.869   2
   6   8   2 979.689 401.685   2
   6  -8  -3 1905.94 301.149   2
   6   8   3 1920.59 480.408   3
   6   8   3 1610.08 438.214   2
   6   8   4 1098.82 411.348   3
   6   8   4 1429.39 462.282   2
   6  -8  -4 1417.57 305.674   2
   6   8   5 5415.28 778.737   3
   6  -8  -5 5929.43 581.464   2
   6   8   6 48.8815 256.856   3
   6   8   7 4321.47 716.238   3
   6   8   8 1318.72 475.258   3
   6   8   9 733.987 382.179   3
   6   8  10 750.742 406.948   3
   6   8  11 1462.16 555.557   3
   6   8  12 20135.0 1646.14   3
   6   8  13 8568.82 1093.56   3
   6   8  14 629.153 391.827   3
   6   8  15 1498.64 482.376   3
   6   8  16 1566.63 519.735   3
   6   8  17 1818.27 552.084   3
   6   8  18 559.970 379.381   3
   6   8  19 719.769 469.166   3
   6   8  20 1958.04 660.291   3
   6   8  21 437.785 358.362   3
   6   8  22 143.494 383.448   3
   6   8  23 2300.62 687.131   3
  -6   9  21 1333.18 535.573   3
  -6   9  20 1198.67 408.694   3
  -6   9  19 77.8043 309.688   3
  -6   9  18 897.991 560.273   3
  -6   9  17 3184.89 810.770   3
  -6   9  16 7708.31 1176.46   3
  -6   9  15 825.543 503.723   3
  -6   9  14 417.362 427.061   3
  -6   9  13 2164.77 700.841   3
   6   9 -11 110.820 428.954   2
   6   9 -10 886.273 566.916   2
   6   9  -9 9781.07 1283.05   2
   6   9  -8 10767.5 1297.02   2
   6   9  -7 227.651 232.146   3
   6   9  -7 345.786 445.790   2
   6   9  -6 4650.83 662.714   3
   6   9  -6 4645.47 836.806   2
   6   9  -5 1679.10 394.157   3
   6   9  -5 2189.39 551.291   2
   6   9  -4 2819.28 642.046   2
   6   9  -4 3655.33 613.267   3
   6   9  -3 3147.44 610.727   2
   6   9  -3 4891.85 720.623   3
   6   9  -2 121.985 310.969   2
   6   9  -2 219.268 282.264   3
   6   9  -1 1888.66 553.215   2
   6   9  -1 1748.61 482.130   3
   6   9   0-256.908 360.988   2
   6   9   0 124.972 246.340   3
   6   9   1 1213.63 424.480   2
   6   9   1 1734.97 517.873   3
   6   9   2 666.551 382.459   2
   6   9   2 311.552 287.796   3
   6   9   3 3929.55 715.317   3
   6   9   3 4427.66 763.129   2
   6   9   4 3926.71 718.874   3
   6   9   5 1518.98 478.753   3
   6   9   6 5465.57 829.364   3
   6   9   7 406.931 401.344   3
   6   9   8 11200.0 1249.92   3
   6   9   9 10619.4 1229.62   3
   6   9  10 1552.46 493.280   3
   6   9  11 123.699 289.560   3
   6   9  12 1168.78 512.762   3
   6   9  13 2478.65 647.367   3
   6   9  14 671.222 352.785   3
   6   9  15 2162.88 617.246   3
   6   9  16 6322.40 1010.32   3
   6   9  17 2314.31 672.467   3
   6   9  18 23.9714 354.274   3
   6   9  19-100.445 357.825   3
   6   9  20 2150.03 756.229   3
   6   9  21 1883.05 645.890   3
  -6  10  18 442.290 328.251   3
  -6  10  17 146.694 307.313   3
  -6  10  16-79.7653 352.246   3
  -6  10  15 4902.66 967.417   3
  -6  10  14 1202.95 482.133   3
   6  10 -13 2257.27 737.327   2
   6  10 -12 6988.81 1134.76   2
   6  10 -11 478.108 450.426   2
   6  10 -10 1142.26 418.233   2
   6  10  -9 1249.96 540.360   2
   6  10  -8 3311.82 760.895   2
   6  10  -7 1014.77 465.582   2
   6  10  -6-44.9454 317.154   2
   6  10  -5 2411.21 578.935   2
   6  10  -5 1311.68 395.752   3
   6  10  -4-224.499 417.227   2
   6  10  -4 404.373 260.041   3
   6  10  -3 729.514 388.074   2
   6  10  -3 716.979 404.285   3
   6  10  -2 5426.77 859.569   2
   6  10  -2 5263.74 807.738   3
   6  10  -1 1854.60 500.226   2
   6  10  -1 2999.49 660.196   3
   6  10   0 2581.76 601.497   2
   6  10   0 4093.63 745.772   3
   6  10   1 4011.83 777.154   2
   6  10   1 2864.65 641.422   3
   6  10   2 5007.73 873.729   2
   6  10   2 6305.20 904.391   3
   6  10   3 401.648 354.764   3
   6  10   4 2.00026 296.537   3
   6  10   5 3366.96 713.148   3
   6  10   6 713.283 439.660   3
   6  10   7 1369.35 456.583   3
   6  10   8 2625.64 638.140   3
   6  10   9 1618.93 526.434   3
   6  10  10 1024.95 484.788   3
   6  10  11 55.8853 276.549   3
   6  10  12 4474.51 887.903   3
   6  10  13 2039.48 649.790   3
   6  10  14 1873.92 642.313   3
   6  10  15 6126.79 1023.74   3
   6  10  16 475.958 345.616   3
   6  10  17 154.854 337.022   3
   6  10  18-62.8022 434.377   3
   6  11 -14 482.931 499.131   2
   6  11 -13 1878.24 621.174   2
   6  11 -12 981.698 530.488   2
   6  11 -11 2262.26 674.777   2
   6  11 -10-395.521 418.910   2
   6  11  -9 999.465 457.549   2
   6  11  -8 1185.41 433.684   2
   6  11  -7 73.4501 307.718   2
   6  11  -6 6140.14 961.413   2
   6  11  -5 2174.89 570.166   2
   6  11  -4 337.652 274.779   2
   6  11  -3 745.654 409.691   2
   6  11  -3 659.816 379.061   3
   6  11  -2 1275.16 561.800   2
   6  11  -2 1992.86 531.626   3
   6  11  -1 1309.83 573.222   2
   6  11  -1 3147.83 663.874   3
   6  11   0 825.659 452.298   2
   6  11   0 411.580 392.576   3
   6  11   1 2519.72 642.601   3
   6  11   2 1925.90 628.515   3
   6  11   3 1277.48 472.042   3
   6  11   4 704.413 437.460   3
   6  11   5 3753.23 801.159   3
   6  11   6 10448.7 1263.00   3
   6  11   7 235.823 323.270   3
   6  11   8 990.834 471.792   3
   6  11   9 2046.87 659.607   3
   6  11  10 93.6086 367.481   3
   6  11  11 4143.18 833.501   3
   6  11  12 952.909 511.810   3
   6  11  13 1962.57 633.554   3
   6  11  14 845.924 477.094   3
   6  12  -7 506.761 445.176   2
   6  12  -6 1395.70 491.060   2
   6  12  -5 60.8198 332.896   2
   6  12  -4 237.192 499.303   2
   6  12  -3 1678.77 730.304   2
   6  12  -2 4179.13 833.186   2
   6  12   0 811.142 498.795   3
   6  12   1 25.9056 324.776   3
   6  12   2 6006.91 1008.32   3
   6  12   3 1870.25 582.042   3
   6  12   4 467.948 367.648   3
   6  12   5 277.311 350.565   3
   6  12   6 1208.02 553.692   3
   6  12   7 628.811 530.270   3
  -7   0   0 18.1250 178.970   1
   7   0   0 14.7222 207.017   2
  -7   0  -1-116.822 199.862   1
   7   0  -1 209.937 221.762   2
   7   0   1-209.280 257.439   2
  -7   0   1 112.118 215.823   1
   7   0   2 4677.47 681.385   2
   7   0  -2 4513.18 634.635   2
  -7   0   2 4992.41 645.859   1
  -7   0  -2 5872.35 641.797   1
   7   0   3 13577.4 1100.10   2
  -7   0   3 11180.1 940.766   1
  -7   0  -3 11824.0 873.795   1
   7   0   4 386.881 333.302   2
  -7   0   4 16.1055 286.424   1
  -7   0   5 4537.44 665.101   1
   7   0   5 6637.02 829.011   2
   7   0  -6 11112.5 803.039   3
   7   0   6 11081.6 1038.46   2
  -7   0   6 12079.5 1074.61   1
   7   0   7 4187.46 687.074   2
  -7   0   7 3251.54 594.265   1
   7   0  -7 3507.82 436.452   3
  -7   0   8 1477.50 430.101   1
   7   0  -8 936.086 254.430   3
   7   0  -9 8413.38 639.582   3
  -7   0   9 8698.67 948.128   1
  -7   0  10 6155.37 867.169   1
   7   0 -10 5241.72 491.762   3
  -7   0  11 2822.87 607.756   1
   7   0 -11 1984.55 297.162   3
   7   0 -12 2477.53 312.512   3
  -7   0  12 2551.18 563.099   1
  -7   0  13 6484.49 887.972   1
   7   0 -13 6193.52 485.428   3
  -7   0  14 6780.00 941.693   1
   7   0 -14 6110.61 475.153   3
   7   0 -15 24170.7 919.632   3
  -7   0  15 29587.7 1960.43   1
  -7   0  16 761.426 433.242   1
  -7   0  17 2135.23 613.272   1
  -7   0  18 1893.56 606.588   1
  -7   0  19 7137.89 1055.08   1
  -7   0  20 1723.42 613.413   1
  -7   0  21-439.731 458.021   1
  -7   0  22-307.502 356.304   1
  -7   0  23 25.8458 418.884   1
  -7   0  24-500.508 459.656   1
  -7   0  25 3751.13 872.494   1
  -7   0  26 261.327 504.444   1
  -7   0  27 733.806 529.367   1
  -7   0  28-874.093 522.825   1
  -7   0  29 466.121 555.158   1
  -7   1  29 328.613 465.422   1
  -7   1  28 831.444 602.968   1
  -7   1  27 3351.40 893.746   1
  -7   1  26 1642.54 748.450   1
  -7   1  25 1222.07 588.904   1
  -7   1  24 2376.92 761.021   1
  -7   1  23 2415.31 729.403   1
  -7   1  22 504.586 486.050   1
  -7   1  21 1945.82 613.950   1
  -7   1  20 972.950 511.785   1
  -7   1  19 3812.77 777.110   1
  -7   1  18 12760.8 1306.56   1
  -7   1  17 484.238 384.679   1
  -7   1  16 1543.96 567.204   1
  -7   1  15 4521.45 745.673   1
  -7   1  14 4160.89 724.531   1
   7   1 -13 437.717 84.5283   3
  -7   1  13 1150.83 425.048   1
   7   1 -12 824.456 129.769   3
  -7   1  12 1122.20 520.616   1
   7   1 -11 4808.81 343.344   3
  -7   1  11 7528.26 957.470   1
   7   1 -10 11521.0 584.625   3
  -7   1  10 14811.4 1237.53   1
   7   1  -9 18595.0 810.403   3
  -7   1   9 20631.1 1430.25   1
   7   1  -8 2573.04 325.305   3
  -7   1   8 3488.78 637.461   1
  -7   1   7 4018.59 655.855   1
   7  -1   7 3295.39 582.361   2
   7   1  -7 3744.55 413.951   3
  -7  -1  -7 4703.37 473.763   1
   7  -1   6 23892.7 1110.08   1
   7  -1   6 23141.5 1448.61   2
  -7  -1  -6 23525.3 1051.31   1
  -7   1   6 22339.1 1444.58   1
   7  -1   5 202.999 261.876   2
  -7   1   5 997.548 338.492   1
  -7  -1  -5 881.534 238.894   1
   7  -1   5 1126.74 265.376   1
   7  -1   4 1844.30 362.116   1
   7  -1   4 1453.23 404.628   2
  -7  -1  -4 1408.38 314.265   1
  -7   1   4 1113.29 345.197   1
   7  -1   3 4398.68 625.859   2
  -7   1   3 4205.62 612.516   1
   7  -1   3 4127.94 519.987   1
  -7  -1  -3 4759.54 541.692   1
   7  -1   2 14329.0 965.755   1
   7   1  -2 12578.0 1096.11   2
   7  -1   2 12598.3 1020.15   2
  -7  -1  -2 13342.8 918.158   1
  -7   1   2 14417.5 1092.25   1
   7  -1   1 8157.83 754.958   1
   7   1  -1 8598.99 913.597   2
   7  -1   1 8592.37 853.633   2
  -7  -1  -1 7551.75 714.837   1
   7  -1   0 762.900 295.914   1
   7  -1   0 316.462 188.050   2
   7   1   0 96.6066 299.432   2
  -7  -1   0 911.499 319.327   1
   7  -1  -1 7347.10 761.628   1
   7  -1  -1 6420.88 746.885   2
  -7  -1   1 7380.09 742.229   1
   7   1   1 5916.86 758.591   2
   7  -1  -2 12268.1 995.934   1
   7  -1  -2 11580.4 985.176   2
   7   1   2 12670.2 1079.36   2
  -7  -1   2 12764.7 992.311   1
   7  -1  -3 3264.21 532.726   1
   7   1   3 2730.81 530.125   2
  -7  -1   3 2324.52 452.514   1
   7   1   4 1833.84 445.146   2
  -7  -1   4 1869.82 487.255   1
   7   1   5 847.398 321.561   2
   7  -1  -5 717.261 260.505   3
  -7  -1   5 1163.32 427.765   1
   7  -1  -6 21342.7 1172.17   3
  -7  -1   6 21389.3 1387.99   1
   7   1   6 23892.7 1515.20   2
   7   1   7 4847.67 705.623   2
   7  -1  -7 3951.83 516.583   3
  -7  -1   7 4162.80 702.898   1
   7   1   8 2333.48 510.877   2
   7  -1  -8 2460.82 419.439   3
  -7  -1   8 2954.78 618.525   1
   7  -1  -9 16221.0 1013.25   3
  -7  -1   9 16276.4 1269.74   1
   7  -1 -10 14930.7 963.924   3
  -7  -1  10 14121.7 1229.61   1
   7  -1 -11 8101.75 693.989   3
  -7  -1  11 9356.25 1008.94   1
   7  -1 -12 1387.94 320.536   3
  -7  -1  12 536.904 336.856   1
   7  -1 -13 2099.73 343.354   3
  -7  -1  13 2344.63 560.476   1
   7  -1 -14 4445.68 507.894   3
  -7  -1  14 3948.05 727.656   1
  -7  -1  15 5706.60 846.313   1
   7  -1 -15 5415.85 543.358   3
  -7  -1  16 108.121 300.819   1
   7  -1 -16 885.147 253.047   3
  -7  -1  17 1.40642 316.698   1
  -7  -1  18 14362.2 1436.33   1
  -7  -1  19 2816.81 735.401   1
  -7  -1  20 361.110 356.183   1
  -7  -1  21 1273.04 491.557   1
  -7  -1  22 910.791 467.643   1
  -7  -1  23 2682.83 768.918   1
  -7  -1  24 1025.51 658.241   1
  -7  -1  25 1671.77 701.820   1
  -7  -1  26-63.4252 428.458   1
  -7  -1  27 3008.10 964.191   1
  -7  -1  28 661.405 579.585   1
  -7  -1  29 597.973 576.922   1
  -7   2  19 5754.10 921.489   1
  -7   2  18 13.7665 379.006   1
  -7   2  17 5134.06 863.783   1
  -7   2  16 11885.4 1235.93   1
  -7   2  15 10395.7 1147.30   1
  -7   2  14 2679.64 622.468   1
   7  -2  14 1952.85 224.058   1
   7  -2  13 10657.5 560.303   1
  -7   2  13 10917.0 1156.03   1
   7  -2  12 19771.4 828.406   1
   7  -2  11 1598.33 277.705   1
  -7  -2 -11 826.729 165.293   1
   7  -2  10 6128.95 522.989   1
  -7  -2 -10 4828.47 386.025   1
   7  -2   9 20893.3 989.509   1
  -7  -2  -9 19138.8 831.803   1
   7  -2   8 1963.97 332.297   1
   7   2  -8 1719.30 236.829   3
  -7  -2  -8 1584.21 278.258   1
   7  -2   7 3958.97 470.736   1
  -7  -2  -7 3291.81 402.376   1
   7  -2   6 5798.59 723.060   2
  -7  -2  -6 5481.85 538.253   1
   7  -2   6 6081.31 596.881   1
   7  -2   5 4034.02 613.093   2
  -7  -2  -5 3413.43 439.624   1
   7  -2   5 4090.60 515.149   1
   7  -2   4 3865.67 584.096   2
  -7  -2  -4 4582.73 512.567   1
   7  -2   4 4986.27 591.613   1
   7   2  -3 18649.9 1396.40   2
  -7  -2  -3 19945.6 1081.16   1
   7  -2   3 18966.6 1138.64   1
   7  -2   3 18470.1 1230.73   2
   7  -2   2 1976.56 422.492   2
  -7  -2  -2 2297.73 405.006   1
   7  -2   2 3245.86 507.255   1
   7   2  -2 3344.66 636.011   2
  -7  -2  -1 262.675 227.891   1
   7  -2   1 5.70504 161.098   1
   7   2  -1-451.181 382.625   2
   7  -2   1 341.746 233.403   2
  -7  -2   0 18165.9 1119.79   1
   7  -2   0 17775.9 1192.03   1
   7  -2   0 17145.3 1149.65   2
   7   2   0 17211.3 1292.59   2
  -7  -2   1 118.121 178.828   1
   7  -2  -1 844.688 332.004   1
   7  -2  -1 234.983 197.066   2
   7   2   1 567.564 293.863   2
   7   2   2 1499.61 436.621   2
  -7  -2   2 2376.12 461.136   1
   7  -2  -2 2689.60 494.412   1
   7  -2  -2 870.782 329.833   2
  -7  -2   3 18989.2 1248.63   1
   7   2   3 18355.7 1335.48   2
   7   2   4 4514.97 696.296   2
  -7  -2   4 4008.27 622.888   1
   7  -2  -4 3340.81 548.769   3
   7   2   5 3969.80 625.805   2
  -7  -2   5 3493.49 607.086   1
   7  -2  -5 3090.61 493.131   3
   7  -2  -6 6447.01 705.992   3
  -7  -2   6 6699.89 823.460   1
   7   2   6 7899.64 903.602   2
  -7  -2   7 3097.98 574.387   1
   7   2   7 2339.77 480.751   2
   7  -2  -7 2854.02 479.591   3
  -7  -2   8 2342.40 530.186   1
   7   2   8 2560.36 548.433   2
   7  -2  -8 2339.28 433.831   3
   7  -2  -9 22352.4 1289.34   3
  -7  -2   9 22540.9 1533.11   1
  -7  -2  10 5959.50 848.882   1
   7  -2 -10 5652.51 661.130   3
  -7  -2  11 1655.74 555.504   1
   7  -2 -11 1200.13 338.769   3
  -7  -2  12 18678.3 1517.29   1
   7  -2 -12 17700.2 1122.67   3
  -7  -2  13 11397.8 1229.00   1
   7  -2 -13 10172.1 853.710   3
   7  -2 -14 2807.69 492.997   3
  -7  -2  14 3165.29 711.198   1
  -7  -2  15 10267.1 1216.20   1
   7  -2 -15 8487.32 800.998   3
  -7  -2  16 9057.48 1176.76   1
   7  -2 -16 8580.56 802.736   3
  -7  -2  17 2857.31 715.029   1
  -7  -2  18-96.5185 372.071   1
  -7  -2  19 5173.18 926.073   1
  -7  -2  20 4588.64 915.727   1
  -7  -2  21 762.950 479.788   1
  -7  -2  22 436.284 452.249   1
  -7  -2  23 1198.09 659.617   1
  -7  -2  24 2643.63 729.596   1
  -7  -2  25 2706.50 823.565   1
  -7  -2  26 322.402 489.184   1
  -7  -2  27 154.804 475.387   1
  -7  -2  28 1992.97 910.991   1
  -7  -2  29 1717.76 784.602   1
  -7   3  24 40.2828 266.082   3
  -7   3  23 835.315 456.996   3
  -7   3  22 2098.46 566.727   3
   7  -3  15 7850.22 543.885   1
   7  -3  14 5054.30 467.634   1
  -7  -3 -13 2648.36 236.887   1
   7  -3  13 5076.80 481.785   1
  -7  -3 -12 3048.50 292.365   1
   7  -3  12 4448.97 474.117   1
  -7  -3 -11 229.327 108.248   1
   7  -3  11 589.892 226.953   1
  -7  -3 -10 1340.84 252.462   1
   7  -3  10 928.585 272.791   1
  -7  -3  -9 18576.8 876.946   1
   7  -3   9 18844.4 1062.54   1
  -7  -3  -8 6692.34 569.320   1
   7  -3   8 5798.92 620.646   1
  -7  -3  -7 2084.15 345.401   1
   7   3  -7 1546.70 212.094   3
   7  -3   7 2259.64 437.396   1
   7   3  -6 1295.00 208.731   3
   7  -3   6 1469.96 324.365   1
  -7  -3  -6 1559.91 342.951   1
   7  -3   5 3018.13 499.206   2
   7  -3   5 3783.41 549.658   1
  -7  -3  -5 4531.84 523.872   1
  -7  -3  -4 8358.03 721.784   1
   7  -3   4 8898.91 845.963   2
   7  -3   4 9114.63 846.215   1
  -7  -3  -3 7358.70 712.868   1
   7   3  -3 7938.53 945.943   2
   7  -3   3 6350.44 727.671   2
   7  -3   3 7799.33 802.750   1
   7  -3   2 5265.77 630.123   2
   7  -3   2 4526.79 618.404   1
  -7  -3  -2 5075.33 631.798   1
   7   3  -2 5052.12 740.077   2
   7  -3   1 984.852 270.499   2
   7  -3   1 1236.05 347.294   1
   7   3  -1 1247.12 439.524   2
  -7  -3  -1 1058.89 365.108   1
   7  -3   0 1330.18 399.779   1
   7  -3   0 643.673 244.332   2
  -7  -3   0 1276.54 367.714   1
   7   3   0 1063.95 295.482   2
   7   3   1 1270.73 387.413   2
   7  -3  -1 618.830 207.164   2
  -7  -3   1 1309.97 350.002   1
   7   3   2 4200.46 681.840   2
   7  -3  -2 4272.64 569.568   2
  -7  -3   2 4999.19 682.202   1
  -7  -3   3 5488.53 726.055   1
   7   3   3 5760.49 780.061   2
  -7  -3   4 8193.63 892.267   1
   7   3   4 8842.67 966.798   2
  -7  -3   5 4424.98 686.996   1
   7   3   5 4307.81 693.370   2
   7  -3  -5 3628.17 594.403   3
  -7  -3   6 1756.62 471.383   1
   7   3   6 1506.67 400.972   2
   7  -3  -6 1397.43 384.283   3
  -7  -3   7 2412.13 546.807   1
   7   3   7 2656.22 584.708   2
   7  -3  -7 2104.10 431.318   3
  -7  -3   8 8805.48 997.755   1
   7  -3  -8 7702.28 830.820   3
   7   3   8 8787.10 980.743   2
  -7  -3   9 20418.0 1524.75   1
   7  -3  -9 18799.3 1297.50   3
  -7  -3  10 265.190 332.898   1
   7  -3 -10 546.155 316.008   3
  -7  -3  11 6.17657 262.294   1
   7  -3 -11 619.070 315.610   3
   7  -3 -12 4901.42 660.385   3
  -7  -3  12 4345.61 782.869   1
  -7  -3  13 4376.11 842.619   1
   7  -3 -13 5018.27 677.598   3
  -7  -3  14 6665.78 1000.49   1
   7  -3 -14 5769.97 743.870   3
  -7  -3  15 11476.7 1317.98   1
   7  -3 -15 9131.60 908.754   3
  -7  -3  16 10541.9 1301.59   1
   7  -3 -16 7681.25 824.521   3
  -7  -3  17 308.314 406.385   1
  -7  -3  18 3874.00 860.786   1
  -7  -3  19 385.531 327.722   1
  -7  -3  20 1254.16 612.488   1
  -7  -3  21 9117.40 1302.00   1
  -7  -3  22 2593.90 875.036   1
  -7  -3  23 394.809 498.625   1
  -7  -3  24 1562.33 617.225   1
  -7  -3  25 4203.39 1049.14   1
  -7  -3  26 398.684 565.651   1
  -7  -3  27 655.499 676.050   1
  -7  -3  28 1126.12 832.521   1
  -7   4  25 0.77824 242.861   3
  -7   4  24 5039.63 884.794   3
  -7   4  23 763.231 452.830   3
  -7   4  22 1951.50 578.608   3
  -7   4  21 4321.88 804.441   3
  -7   4  20 1241.20 499.606   3
   7  -4   9 9269.56 805.570   1
   7  -4   8 2992.54 474.511   1
   7   4  -8 1221.09 148.584   3
   7  -4   7 3456.95 522.830   1
   7   4  -7 2649.57 277.994   3
   7  -4   6 1830.80 404.687   1
   7   4  -6 1839.99 260.489   3
   7  -4   5 4909.13 645.010   1
   7   4  -5 6648.99 510.314   3
   7   4  -4 5348.93 485.806   3
   7  -4   4 5866.65 649.073   2
   7   4  -4 5263.30 843.731   2
   7  -4   4 5243.18 661.644   1
   7   4  -3 4113.03 460.802   3
   7  -4   3 3688.83 519.319   2
   7  -4   3 4160.84 600.429   1
   7   4  -3 4209.36 723.683   2
   7  -4   2 19.8230 220.625   2
   7   4  -2 450.730 236.883   3
   7   4  -2 58.7979 249.684   2
   7   4  -1 5371.50 566.633   3
   7  -4   1 5240.53 625.137   2
   7   4  -1 5369.34 760.863   2
   7   4   0 20357.5 1124.02   3
   7  -4   0 19584.2 1158.65   2
   7   4   0 19256.1 1403.59   2
   7   4   1 6949.45 683.830   3
   7  -4  -1 5966.02 654.567   2
   7   4   1 6876.94 865.882   2
   7   4   2 625.047 339.384   2
   7   4   2 166.607 239.076   3
   7  -4  -2-93.4890 202.668   2
   7   4   3 4228.40 712.148   2
   7   4   4 7500.41 894.320   2
   7   4   5 5217.26 752.982   2
   7   4   6 2330.56 507.700   2
   7   4   7 4223.96 695.226   2
  -7   4 -10 260.038 241.073   2
  -7  -4  10 103.327 325.960   1
  -7  -4  11-6.88175 352.332   1
  -7  -4  12 20122.8 1727.65   1
  -7  -4  13 6664.41 1046.25   1
  -7  -4  14 259.345 366.484   1
  -7  -4  15 539.003 371.113   1
  -7  -4  16 3783.45 820.055   1
  -7  -4  17 6997.64 1102.52   1
  -7  -4  18 1197.40 663.724   1
  -7  -4  19 1008.66 630.441   1
  -7  -4  20 300.371 538.661   1
  -7  -4  21 1682.28 722.892   1
   7   4  21 3712.84 833.320   3
  -7  -4  22 775.789 430.191   1
   7   4  22 1949.74 682.985   3
  -7  -4  23-304.132 467.244   1
   7   4  23 594.463 425.320   3
  -7  -4  24 2605.89 814.448   1
   7   4  24 3747.74 867.493   3
   7   4  25-77.4210 375.518   3
  -7  -4  25 237.853 431.099   1
   7   4  26 123.145 421.833   3
  -7  -4  26-600.470 532.711   1
   7   4  27 1995.36 756.887   3
  -7  -4  27 1714.42 715.615   1
  -7   5  25 3620.55 796.746   3
  -7   5  24 1912.49 660.482   3
  -7   5  23 479.770 437.845   3
  -7   5  22 5327.91 927.424   3
  -7   5  21 6317.54 970.950   3
  -7   5  20 4734.73 856.957   3
  -7   5  19 2458.52 652.367   3
   7   5  -8 2948.44 276.644   3
   7   5  -7 1120.93 200.603   3
   7   5  -6 5406.15 465.666   3
   7   5  -5 1284.38 257.803   3
   7   5  -5 1168.77 463.627   2
   7   5  -4 3087.47 414.586   3
   7   5  -4 2524.98 593.250   2
   7   5  -3 30184.0 1892.85   2
   7  -5   3 31367.1 1451.32   2
   7   5  -3 30453.1 1291.05   3
   7  -5   2 1044.96 311.963   2
   7   5  -2 1185.12 292.136   3
   7   5  -2 1654.39 518.084   2
   7   5  -1 8005.32 722.294   3
   7  -5   1 7182.93 680.632   2
   7   5  -1 7304.19 883.867   2
   7   5   0 3228.64 608.390   2
   7  -5   0 3122.21 458.746   2
   7   5   0 3963.58 545.732   3
   7   5   1 9487.49 843.494   3
   7  -5  -1 7209.17 692.811   2
   7   5   1 8800.74 968.771   2
   7   5   2 331.652 308.328   2
   7   5   2 314.917 251.551   3
   7  -5  -2 204.918 170.354   2
   7   5   3 28117.9 1476.64   3
   7  -5  -3 28945.6 1416.94   2
   7   5   3 26499.1 1709.64   2
   7   5   4 3675.27 683.447   2
   7   5   4 4297.71 615.849   3
   7   5   5 1488.61 452.001   2
   7   5   5 1515.03 399.562   3
   7   5   6 4015.02 711.268   2
   7   5   6 4505.47 682.893   3
   7   5   7 2130.43 545.285   2
   7   5   7 2072.58 501.391   3
   7   5   8 4581.73 721.704   3
   7   5   9 6004.08 846.761   3
   7   5  10 335.816 240.979   3
   7   5  11 606.406 359.026   3
  -7   5 -11 478.512 261.436   2
   7   5  12 7211.51 926.841   3
  -7   5 -12 5983.36 784.848   2
   7   5  13 7357.14 980.234   3
   7   5  14 2948.94 635.370   3
   7   5  15 1361.45 490.959   3
   7   5  16 8013.74 1072.45   3
  -7  -5  16 6230.25 1051.23   1
  -7  -5  17 476.673 549.008   1
   7   5  17 161.660 344.401   3
  -7  -5  18 715.375 588.922   1
   7   5  18 1549.75 625.787   3
  -7  -5  19 549.653 508.293   1
   7   5  19 2237.50 699.537   3
  -7  -5  20 3271.22 815.767   1
   7   5  20 2800.71 648.430   3
  -7  -5  21 5997.47 1163.05   1
   7   5  21 5807.80 1014.97   3
  -7  -5  22 4619.07 1095.15   1
   7   5  22 3694.42 839.511   3
  -7  -5  23 239.034 552.126   1
   7   5  23 961.933 519.328   3
  -7  -5  24 2432.34 805.599   1
   7   5  24 2709.32 752.346   3
  -7  -5  25 1686.24 760.136   1
   7   5  25 3833.65 907.265   3
  -7  -5  26 1665.74 846.429   1
   7   5  26 935.793 520.767   3
  -7   6  25 713.742 513.342   3
  -7   6  24 2610.65 688.717   3
  -7   6  23 373.189 364.242   3
  -7   6  22 1896.39 644.664   3
  -7   6  21 859.942 489.706   3
  -7   6  20 1036.75 529.219   3
  -7   6  19 2308.48 678.269   3
  -7   6  18 4580.13 826.216   3
   7   6  -8 445.453 157.480   3
   7   6  -7 15858.5 816.744   3
   7   6  -7 14401.2 1490.40   2
   7   6  -6 1872.27 571.740   2
   7   6  -6 1632.41 326.101   3
   7   6  -5 1168.97 413.155   2
   7   6  -5 2598.32 406.099   3
   7   6  -4 4584.38 538.100   3
   7   6  -4 3797.82 723.905   2
   7   6  -3 8275.62 736.064   3
   7   6  -3 6023.90 898.601   2
   7   6  -2 3738.61 526.508   3
   7  -6   2 3783.53 505.641   2
   7   6  -2 4018.50 713.811   2
   7  -6   1 4683.36 563.791   2
   7   6  -1 5447.13 637.372   3
   7   6   0 4138.85 728.169   2
   7  -6   0 4120.91 516.939   2
   7   6   0 3869.06 564.866   3
   7   6   1 5558.17 808.329   2
   7   6   1 5007.85 645.381   3
   7  -6  -1 5329.47 577.420   2
   7   6   2 4436.72 741.962   2
   7   6   2 4208.81 626.854   3
   7  -6  -2 4022.49 534.051   2
   7   6   3 9959.21 957.844   3
   7  -6  -3 9140.99 795.408   2
   7   6   3 9494.70 1039.42   2
   7   6   4 2566.80 567.145   2
   7   6   4 3561.56 577.440   3
   7  -6  -4 3352.67 495.824   2
   7   6   5 1502.93 471.832   2
   7   6   5 1406.73 415.814   3
   7   6   6 1650.06 433.469   3
   7   6   6 1948.13 535.816   2
   7   6   7 14658.8 1228.12   3
   7   6   8 782.667 382.818   3
   7   6   9 2370.96 571.788   3
   7   6  10 3753.22 683.654   3
   7   6  11 3200.65 721.972   3
   7   6  12 13265.6 1287.82   3
   7   6  13 1545.40 490.057   3
   7   6  14 2506.43 584.500   3
   7   6  15 3435.96 747.546   3
   7   6  16 857.297 427.330   3
   7   6  17 3567.42 745.892   3
   7   6  18 3699.30 748.605   3
   7   6  19 1662.08 598.083   3
  -7  -6  19 1153.75 689.040   1
   7   6  20-218.299 360.791   3
  -7  -6  20-7.97074 550.362   1
  -7  -6  21 861.309 822.979   1
   7   6  21 1078.75 523.330   3
  -7  -6  22 2105.56 838.293   1
   7   6  22 749.126 545.394   3
  -7  -6  23 261.498 504.024   1
   7   6  23-76.6371 409.755   3
  -7  -6  24 1823.80 876.683   1
   7   6  24 2716.31 771.551   3
  -7  -6  25 1503.66 777.914   1
   7   6  25 593.397 436.871   3
  -7   7  23 4389.51 985.704   3
  -7   7  22 8854.23 1306.11   3
  -7   7  21 716.950 499.680   3
  -7   7  20 1029.75 455.776   3
  -7   7  19 1426.00 595.494   3
  -7   7  18 7279.31 1111.44   3
   7   7  -8 223.146 315.478   2
   7   7  -7 1953.74 355.226   3
   7   7  -7 1448.24 547.611   2
   7   7  -6 10258.4 780.103   3
   7   7  -6 8662.28 1141.78   2
   7   7  -5 822.747 265.452   3
   7   7  -5 1194.63 521.483   2
   7   7  -4 2545.47 609.725   2
   7   7  -4 3230.11 497.139   3
   7   7  -3 3959.58 552.984   3
   7   7  -3 3307.67 635.395   2
   7   7  -2 556.754 365.665   2
   7   7  -2 291.922 184.802   3
   7   7  -1 6494.51 945.648   2
   7   7  -1 6724.72 756.586   3
   7   7   0 2277.32 546.430   2
   7   7   0 2745.92 521.658   3
   7  -7   0 2559.58 431.728   2
   7   7   1 6544.95 907.567   2
   7  -7  -1 7993.37 710.012   2
   7   7   1 6966.68 812.519   3
   7  -7  -2 592.826 241.404   2
   7   7   2 1118.44 390.884   3
   7   7   2 1342.34 479.357   2
   7   7   3 4887.78 689.601   3
   7   7   3 5741.55 867.379   2
   7  -7  -3 4088.04 527.421   2
   7   7   4 4100.04 671.284   3
   7   7   4 2526.11 616.988   2
   7  -7  -4 3641.29 522.413   2
   7   7   5 1531.15 439.970   3
   7   7   5 914.035 418.950   2
   7   7   6 8180.32 990.087   2
   7   7   6 7760.60 923.833   3
   7   7   7 1640.23 468.680   3
   7   7   8 634.208 346.266   3
   7   7   9 913.956 401.417   3
   7   7  10 1309.03 461.455   3
   7   7  11 5079.92 826.990   3
   7   7  12 2492.94 626.164   3
   7   7  13 433.396 319.517   3
   7   7  14 2324.52 706.239   3
   7   7  15 6375.70 982.848   3
   7   7  16 71.8497 296.105   3
   7   7  17 3403.88 817.403   3
   7   7  18 5493.40 970.519   3
   7   7  19 1256.42 563.277   3
   7   7  20 541.113 511.212   3
   7   7  21 883.182 475.367   3
   7   7  22 7922.16 1214.93   3
  -7  -7  22 9743.55 1631.88   1
   7   7  23 3618.26 876.947   3
  -7  -7  23 3783.00 1063.99   1
  -7   8  21 2097.52 707.733   3
  -7   8  20 868.258 480.396   3
  -7   8  19 3972.29 900.166   3
   7   8 -10 2416.74 673.670   2
   7   8  -9 2453.44 679.287   2
   7   8  -8 998.801 586.743   2
   7   8  -7 4066.01 841.167   2
   7   8  -6 3843.30 801.677   2
   7   8  -5 315.747 226.285   3
   7   8  -5-131.585 308.206   2
   7   8  -4 214.538 202.013   3
   7   8  -4-52.8254 334.001   2
   7   8  -3 8237.91 1097.01   2
   7   8  -3 8916.10 880.932   3
   7   8  -2 7649.25 1038.68   2
   7   8  -2 9204.01 922.075   3
   7   8  -1 6167.94 924.802   2
   7   8  -1 6526.66 792.070   3
   7   8   0 697.479 336.401   3
   7   8   0 2.68340 286.166   2
   7   8   1 5290.35 846.295   2
   7   8   1 7058.58 839.310   3
   7   8   2 7317.23 991.895   2
   7   8   2 7694.79 917.984   3
   7   8   3 5738.56 880.508   2
   7   8   3 7828.75 938.913   3
   7   8   4 298.984 292.511   3
   7   8   4 387.273 340.959   2
   7   8   5 442.908 357.809   3
   7   8   5 1188.09 518.968   2
   7   8   6 4745.97 761.911   3
   7   8   7 3825.83 717.018   3
   7   8   8 917.187 400.117   3
   7   8   9 1953.60 541.460   3
   7   8  10 3151.94 689.388   3
   7   8  11 606.998 319.103   3
   7   8  12 581.320 434.891   3
   7   8  13 818.592 459.370   3
   7   8  14 3564.50 775.163   3
   7   8  15 3554.14 790.183   3
   7   8  16 1575.85 548.841   3
   7   8  17 898.082 432.581   3
   7   8  18 6533.35 1098.79   3
   7   8  19 3217.93 834.358   3
   7   8  20 1312.07 543.837   3
   7   8  21 1718.11 602.965   3
   7   9 -12-258.619 366.668   2
   7   9 -11 3798.93 907.065   2
   7   9 -10 1241.59 534.117   2
   7   9  -9 2833.96 703.946   2
   7   9  -8 2887.06 752.998   2
   7   9  -7 3613.13 806.145   2
   7   9  -6 10093.1 1274.28   2
   7   9  -5-17.1201 312.183   2
   7   9  -4 1119.64 390.375   2
   7   9  -4 1217.05 366.906   3
   7   9  -3 4729.23 841.126   2
   7   9  -3 5146.61 736.609   3
   7   9  -2 727.585 355.678   2
   7   9  -2 644.409 312.064   3
   7   9  -1 1601.34 517.547   2
   7   9  -1 1450.43 429.729   3
   7   9   0 7201.72 1045.76   2
   7   9   0 7152.24 889.049   3
   7   9   1 829.048 477.641   2
   7   9   1 1252.17 455.415   3
   7   9   2 439.891 291.025   3
   7   9   2 526.195 313.993   2
   7   9   3 5168.89 798.077   3
   7   9   3 5959.00 909.126   2
   7   9   4 2689.67 584.314   3
   7   9   4 2206.89 618.544   2
   7   9   5 737.530 414.169   3
   7   9   6 11566.8 1245.02   3
   7   9   7 4246.53 834.342   3
   7   9   8 2919.07 686.287   3
   7   9   9 2953.07 686.623   3
   7   9  10 2086.64 578.047   3
   7   9  11 5665.37 912.756   3
   7   9  12 533.626 370.657   3
   7   9  13 1097.06 536.441   3
   7   9  14 2578.81 698.307   3
   7   9  15 414.358 294.922   3
   7   9  16 355.650 357.226   3
   7   9  17 1309.34 557.373   3
   7   9  18 2596.48 765.707   3
   7   9  19 882.121 461.347   3
   7  10 -14 2670.91 777.561   2
   7  10 -13 740.091 639.524   2
   7  10 -12 3056.28 853.992   2
   7  10 -11 1065.85 647.870   2
   7  10 -10 2732.58 756.019   2
   7  10  -9 1572.61 489.510   2
   7  10  -8-233.122 429.420   2
   7  10  -7 6256.38 1060.66   2
   7  10  -6 1660.14 701.762   2
   7  10  -5 1473.47 536.667   2
   7  10  -4 1796.22 607.708   2
   7  10  -3 1087.26 527.560   2
   7  10  -2 1384.18 565.343   2
   7  10  -1 990.156 497.631   2
   7  10  -1 1051.97 473.359   3
   7  10   0 1740.30 548.363   2
   7  10   0 3128.38 669.167   3
   7  10   1 104.787 364.505   2
   7  10   1-148.372 237.243   3
   7  10   2 1203.11 540.199   2
   7  10   2 980.611 377.549   3
   7  10   3 3528.99 731.536   3
   7  10   4 3302.49 760.251   3
   7  10   5 4602.61 832.880   3
   7  10   6 2916.27 672.466   3
   7  10   7 7248.14 1035.13   3
   7  10   8 1051.54 474.093   3
   7  10   9 1343.00 507.776   3
   7  10  10 2930.98 735.849   3
   7  10  11 713.972 383.834   3
   7  10  12 1207.22 511.712   3
   7  10  13 503.693 377.285   3
   7  10  14 2089.75 653.400   3
   7  10  15 1500.87 558.575   3
   7  11 -10 650.458 542.568   2
   7  11  -9 2536.63 847.592   2
   7  11  -8 4442.23 931.790   2
   7  11  -7 693.644 456.219   2
   7  11  -6 875.379 364.113   2
   7  11  -5 833.361 428.573   2
   7  11  -4 4089.53 818.552   2
   7  11  -3 1769.20 542.163   2
   7  11  -2 291.540 324.996   2
   7  11  -1 77.2994 493.364   2
   7  11   0 6181.42 1005.45   2
   7  11   1 1114.56 557.292   2
   7  11   1-166.267 264.818   3
   7  11   2 867.293 452.974   3
   7  11   3 1160.29 488.488   3
   7  11   4 4206.98 842.472   3
   7  11   5 1009.94 486.745   3
   7  11   6 747.394 422.754   3
   7  11   7 1853.74 643.965   3
   7  11   8 6714.13 1080.92   3
   7  11   9 1733.76 542.281   3
   7  11  10 1396.82 621.753   3
   8   0   0 6782.97 836.994   2
  -8   0   0 8358.87 827.773   1
   8   0   1-633.052 381.089   2
  -8   0  -1 359.147 250.239   1
  -8   0   1 89.5436 211.184   1
   8   0  -1-381.419 330.622   2
   8   0   2 2181.95 520.887   2
  -8   0   2 2162.69 488.429   1
   8   0  -2 1978.22 479.920   2
  -8   0  -2 1384.32 366.124   1
   8   0  -3 9632.58 1029.50   2
   8   0   3 9933.86 1037.85   2
  -8   0   3 9006.82 918.837   1
   8   0   4 18506.5 1393.42   2
  -8   0   4 17515.7 1284.62   1
   8   0   5 8490.16 970.051   2
  -8   0   5 7466.05 887.530   1
   8   0   6 689.075 291.671   2
   8   0  -6 807.565 257.690   3
  -8   0   6 1372.64 405.177   1
   8   0   7 315.464 329.273   2
   8   0  -7-15.5607 143.347   3
  -8   0   7 232.155 290.377   1
   8   0   8 5054.19 748.326   2
   8   0  -8 4975.29 560.548   3
  -8   0   8 5405.22 802.528   1
   8   0  -9 28285.4 1298.92   3
  -8   0   9 28318.4 1768.11   1
  -8   0  10 761.703 404.204   1
   8   0 -10 297.978 196.940   3
   8   0 -11 5590.63 545.840   3
  -8   0  11 6992.51 931.014   1
   8   0 -12 16960.8 905.866   3
  -8   0  12 19929.4 1559.74   1
  -8   0  13 2609.59 646.654   1
  -8   0  14 504.501 377.645   1
  -8   0  15 12116.4 1309.80   1
  -8   0  16 9428.39 1180.36   1
  -8   0  17 613.689 449.944   1
  -8   0  18 448.413 430.752   1
  -8   0  19 1419.89 588.919   1
  -8   0  20 1384.13 562.866   1
  -8   0  21 2690.39 719.261   1
  -8   0  22-16.0734 338.895   1
  -8   0  23 706.893 550.136   1
  -8   0  24-60.6988 426.515   1
  -8   0  25 404.878 372.768   1
  -8   0  26 260.816 519.405   1
  -8   0  27 817.564 522.363   1
  -8   1  27 1626.13 713.997   1
  -8   1  26 4339.00 1025.41   1
  -8   1  25 8349.74 1304.64   1
  -8   1  24 8241.65 1280.30   1
  -8   1  23 981.245 564.787   1
  -8   1  22 622.213 381.720   1
  -8   1  21 166.143 342.894   1
  -8   1  20 1537.52 523.687   1
  -8   1  19 3013.06 730.590   1
  -8   1  18 705.244 459.644   1
  -8   1  17 1511.09 609.710   1
  -8   1  16 555.689 353.854   1
  -8   1  15 999.154 397.281   1
  -8   1  14 1061.90 511.138   1
  -8   1  13 7911.47 1028.14   1
  -8   1  12 3940.47 737.679   1
  -8   1  11 2779.26 581.059   1
   8   1 -11 1156.01 213.246   3
  -8   1  10 5637.88 884.701   1
   8   1 -10 5793.13 494.478   3
   8   1  -9 9141.70 658.651   3
  -8   1   9 11259.6 1131.06   1
  -8   1   8 4166.75 700.937   1
   8   1  -8 2738.96 380.219   3
   8  -1   7 4054.71 687.220   2
   8   1  -7 2603.28 383.063   3
  -8   1   7 3504.97 671.805   1
   8  -1   6 21.7224 273.872   2
  -8  -1  -6 943.339 266.852   1
  -8   1   6 943.055 386.292   1
   8  -1   5 8719.55 962.797   2
  -8  -1  -5 9111.36 745.984   1
  -8   1   5 9123.17 964.840   1
   8  -1   4-84.7763 304.168   2
   8   1  -4-477.607 428.846   2
  -8   1   4-4.35141 245.230   1
  -8  -1  -4 329.675 253.887   1
   8  -1   3 7302.02 870.987   2
  -8  -1  -3 8113.96 758.732   1
   8   1  -3 6824.11 903.525   2
  -8   1   3 7019.23 863.268   1
   8  -1   2 1262.28 382.557   2
  -8  -1  -2 1479.43 377.868   1
   8   1  -2 1115.46 352.480   2
   8  -1   1 6938.33 821.306   2
  -8  -1  -1 7417.85 767.402   1
   8   1  -1 6766.27 871.783   2
   8  -1   0 34051.5 1792.30   2
   8   1   0 36849.2 1952.86   2
  -8  -1   0 34832.9 1658.42   1
   8   1   1 5673.59 770.307   2
  -8  -1   1 6564.98 769.251   1
   8  -1  -1 5936.89 759.395   2
   8   1   2 2278.11 536.691   2
  -8  -1   2 1895.01 454.396   1
   8  -1  -2 2145.71 534.170   2
   8   1   3 5444.51 788.966   2
  -8  -1   3 5356.30 699.825   1
   8  -1  -3 5703.28 774.764   2
  -8  -1   4 92.4961 317.167   1
   8   1   4-782.158 389.210   2
   8  -1  -5 8270.44 900.971   3
  -8  -1   5 9798.43 978.100   1
   8   1   5 9064.42 1012.21   2
  -8  -1   6 1115.75 428.905   1
   8   1   6 908.060 429.027   2
   8  -1  -6 822.293 272.298   3
  -8  -1   7 3285.55 650.040   1
   8   1   7 3470.17 693.083   2
   8  -1  -7 4146.20 579.030   3
  -8  -1   8 3891.05 709.174   1
   8   1   8 3604.26 698.883   2
   8  -1  -8 3216.55 526.633   3
   8  -1  -9 10180.2 878.481   3
  -8  -1   9 10402.7 1099.54   1
   8  -1 -10 8072.43 769.962   3
  -8  -1  10 8472.43 1035.56   1
  -8  -1  11 925.521 363.649   1
   8  -1 -11 1258.47 328.840   3
   8  -1 -12 4092.77 531.820   3
  -8  -1  12 4300.14 788.707   1
  -8  -1  13 5359.25 898.666   1
   8  -1 -13 6064.00 637.015   3
  -8  -1  14 452.797 424.441   1
  -8  -1  15 241.467 320.337   1
  -8  -1  16 68.1911 408.616   1
  -8  -1  17 493.575 388.487   1
  -8  -1  18 58.5600 315.854   1
  -8  -1  19 1219.84 514.527   1
  -8  -1  20 2016.49 691.632   1
  -8  -1  21 1274.86 630.002   1
  -8  -1  22 556.867 419.708   1
  -8  -1  23 442.025 472.762   1
  -8  -1  24 7176.66 1255.83   1
  -8  -1  25 9117.59 1381.72   1
  -8  -1  26 3615.53 1020.65   1
  -8  -1  27 1349.10 633.301   1
   8  -2  11 5891.96 531.591   1
   8  -2  10 2719.49 388.842   1
  -8  -2 -10 1927.74 285.481   1
   8  -2   9 13777.5 870.573   1
  -8  -2  -9 13179.8 768.724   1
   8  -2   8 2425.59 407.512   1
  -8  -2  -8 2397.31 368.123   1
   8   2  -8 1800.09 285.599   3
  -8  -2  -7 4289.41 490.528   1
   8  -2   7 4657.66 561.535   1
   8  -2   6 17666.3 1093.21   1
  -8  -2  -6 17082.7 993.162   1
   8  -2   6 17595.6 1317.08   2
   8  -2   5 10479.8 875.142   1
  -8  -2  -5 8712.74 744.041   1
   8  -2   5 8917.06 953.607   2
   8  -2   4 7487.63 760.960   1
   8   2  -4 9195.22 1087.57   2
  -8  -2  -4 6946.13 687.574   1
   8  -2   4 7519.53 848.951   2
   8  -2   3 3249.82 566.280   2
   8  -2   3 3970.50 577.863   1
  -8  -2  -3 3585.08 514.865   1
   8   2  -3 3414.32 669.318   2
   8  -2   2 182.674 214.802   2
   8  -2   2 1229.95 366.306   1
  -8  -2  -2 1304.51 338.180   1
   8   2  -2 899.790 395.059   2
   8  -2   1 6162.04 752.608   2
   8  -2   1 6682.85 764.652   1
  -8  -2  -1 7232.08 737.868   1
   8   2  -1 6698.72 927.521   2
  -8  -2   0 846.420 326.654   1
   8  -2   0 304.771 217.022   2
   8   2   0 623.492 336.944   2
   8   2   1 5751.90 821.443   2
   8  -2  -1 6589.53 797.937   2
  -8  -2   1 6584.13 783.454   1
   8   2   2 295.060 254.079   2
  -8  -2   2 858.722 313.762   1
   8  -2  -2 207.311 233.673   2
   8   2   3 3674.19 649.636   2
  -8  -2   3 4715.29 688.370   1
   8  -2  -3 4226.80 648.104   2
   8  -2  -4 10502.4 1114.20   3
  -8  -2   4 8855.43 924.150   1
   8   2   4 9585.46 1064.73   2
   8  -2  -5 7813.67 872.701   3
  -8  -2   5 10504.3 1021.01   1
   8   2   5 8978.55 1041.66   2
   8  -2  -6 15401.9 1175.32   3
  -8  -2   6 19323.7 1415.03   1
   8   2   6 18007.7 1433.53   2
   8   2   7 3588.34 693.365   2
  -8  -2   7 4349.62 716.835   1
   8  -2  -7 3763.77 581.871   3
   8   2   8 3853.68 722.994   2
  -8  -2   8 3376.02 654.422   1
   8  -2  -8 2049.15 440.541   3
   8  -2  -9 10812.1 985.824   3
  -8  -2   9 10964.2 1182.50   1
  -8  -2  10 2327.88 604.552   1
   8  -2 -10 3434.67 588.964   3
  -8  -2  11 3063.17 640.512   1
   8  -2 -11 3877.80 602.180   3
  -8  -2  12 2946.05 665.500   1
   8  -2 -12 2651.40 493.598   3
   8  -2 -13 1211.14 328.866   3
  -8  -2  13 2164.49 613.777   1
  -8  -2  14 923.477 466.200   1
  -8  -2  15-419.930 366.527   1
  -8  -2  16 3425.85 797.855   1
  -8  -2  17 571.197 434.326   1
  -8  -2  18 2866.08 703.014   1
  -8  -2  19 3610.58 843.201   1
  -8  -2  20 1645.15 574.737   1
  -8  -2  21 3408.44 852.307   1
  -8  -2  22 441.887 452.010   1
  -8  -2  23 1636.75 585.103   1
  -8  -2  24 1732.54 629.929   1
  -8  -2  25 626.803 540.176   1
  -8  -2  26-231.092 542.528   1
  -8  -2  27 633.136 532.110   1
   8  -3  13 798.085 262.677   1
  -8  -3 -12 1864.19 262.626   1
   8  -3  12 2476.03 373.707   1
   8  -3  11 216.030 194.643   1
  -8  -3 -11 183.417 144.798   1
  -8  -3 -10 6468.00 528.427   1
   8  -3  10 6735.83 642.193   1
  -8  -3  -9 2010.45 346.259   1
   8   3  -9 679.638 121.686   3
   8  -3   9 1542.39 328.824   1
   8   3  -8 815.822 158.378   3
  -8  -3  -8 980.657 269.569   1
   8  -3   8 1420.11 352.536   1
  -8  -3  -7 633.565 259.431   1
   8   3  -7 413.726 156.301   3
   8  -3   7 156.652 178.207   1
  -8  -3  -6 3408.80 478.274   1
   8  -3   6 4088.96 634.457   2
   8  -3   6 2976.75 502.194   1
  -8  -3  -5 982.869 286.715   1
   8  -3   5 638.537 258.500   2
   8   3  -5 200.419 340.182   2
   8  -3   5 842.871 321.705   1
  -8  -3  -4 1894.60 428.001   1
   8  -3   4 1760.08 431.932   2
   8   3  -4 1943.36 600.499   2
   8  -3   4 1776.47 406.116   1
  -8  -3  -3 9660.03 868.988   1
   8   3  -3 8876.02 1078.28   2
   8  -3   3 8752.74 864.815   1
   8  -3   3 8941.06 909.339   2
  -8  -3  -2 11303.9 964.996   1
   8   3  -2 12107.6 1212.58   2
   8  -3   2 11122.6 994.916   2
   8  -3   1 2498.27 505.595   2
  -8  -3  -1 3339.05 574.818   1
   8   3  -1 3237.74 684.643   2
  -8  -3   0 1977.82 424.131   1
   8  -3   0 916.063 316.898   2
   8   3   0 1663.32 484.827   2
   8   3   1 3791.33 689.353   2
  -8  -3   1 3263.48 598.387   1
   8  -3  -1 2756.55 499.479   2
  -8  -3   2 12790.7 1110.96   1
   8  -3  -2 12552.6 1072.46   2
   8   3   2 12125.7 1172.47   2
  -8  -3   3 10130.6 1016.15   1
   8  -3  -3 8991.32 913.975   2
   8   3   3 9874.22 1095.68   2
   8   3   4 2300.08 564.841   2
  -8  -3   4 2236.93 544.259   1
  -8  -3   5 1036.57 380.156   1
   8   3   5 289.245 324.852   2
  -8  -3   6 4698.12 765.924   1
   8   3   6 3993.61 718.119   2
  -8  -3   7 955.551 452.351   1
   8   3   7 140.574 261.967   2
  -8  -3   8 880.228 453.129   1
   8   3   8 893.518 441.175   2
  -8  -3   9 1556.33 539.326   1
  -8  -3  10 8844.25 1090.40   1
  -8  -3  11 893.085 483.703   1
  -8  -3  12 4221.12 788.502   1
  -8  -3  13 1217.79 521.605   1
  -8  -3  14-574.784 441.150   1
  -8  -3  15 4597.54 905.492   1
  -8  -3  16 1506.56 648.311   1
  -8  -3  17 1489.80 566.740   1
  -8  -3  18 3564.39 868.421   1
  -8  -3  19 1014.32 423.038   1
  -8  -3  20 1219.34 513.798   1
  -8  -3  21 1283.79 634.702   1
  -8  -3  22 4401.40 950.104   1
  -8  -3  23 940.669 596.692   1
  -8  -3  24 1775.02 713.222   1
  -8  -3  25 2376.04 869.800   1
  -8  -3  26 4039.42 1088.31   1
  -8  -4 -12 1718.79 294.689   1
  -8  -4 -11 7739.18 622.033   1
   8  -4  11 6489.34 695.399   1
  -8  -4 -10 993.249 260.060   1
   8  -4  10 1079.12 305.015   1
   8  -4   9 2423.85 449.603   1
  -8  -4  -9 2401.47 404.260   1
   8   4  -8 1382.92 187.813   3
   8  -4   8 2271.08 454.724   1
  -8  -4  -8 2658.43 449.988   1
  -8  -4  -7 14164.1 997.225   1
   8  -4   7 12217.2 1026.84   1
  -8  -4  -6 12253.6 972.151   1
   8  -4   6 11180.1 996.465   1
   8   4  -6 10109.6 636.872   3
   8   4  -5 4901.19 477.921   3
   8  -4   5 6468.69 771.448   2
   8   4  -5 4933.41 846.715   2
   8  -4   4 43.2313 187.851   2
   8   4  -4 244.148 208.234   3
   8   4  -4-193.670 361.064   2
   8  -4   3 434.454 218.674   2
   8   4  -3 1136.41 307.690   3
   8   4  -3 206.814 321.872   2
   8  -4   2 953.716 394.477   2
   8   4  -2 1274.77 339.550   3
   8   4  -2 553.547 277.136   2
   8   4  -1 8288.67 757.108   3
   8   4  -1 10476.6 1131.51   2
   8  -4   1 7873.55 828.594   2
   8  -4   0 1895.86 455.597   2
   8   4   0 2201.81 576.834   2
   8   4   0 3579.93 541.013   3
   8   4   1 5978.06 880.799   2
   8  -4  -1 5968.09 732.088   2
  -8  -4   1 6999.03 859.582   1
   8   4   2 790.458 390.118   2
   8  -4  -2 1476.32 406.155   2
  -8  -4   2 1567.12 520.073   1
   8   4   3 1018.03 430.620   2
   8  -4  -3 1345.54 403.265   2
  -8  -4   3 1463.53 466.426   1
   8   4   4 212.208 276.350   2
   8  -4  -4 144.344 267.913   2
  -8  -4   4 390.831 377.940   1
   8   4   5 3903.35 739.068   2
  -8  -4   5 3847.30 739.144   1
  -8  -4   6 13475.9 1304.77   1
   8   4   6 13779.1 1293.10   2
  -8  -4   7 13565.3 1315.50   1
   8   4   7 15048.6 1372.71   2
  -8  -4   8 2133.86 604.581   1
   8   4   8 4106.62 750.230   2
  -8  -4   9 4382.13 836.425   1
  -8  -4  10 1941.04 632.171   1
  -8  -4  11 4945.15 865.172   1
  -8  -4  12 1435.97 561.703   1
  -8  -4  13 3458.05 796.352   1
  -8  -4  14 2979.36 798.739   1
  -8  -4  15 3568.04 897.960   1
  -8  -4  16 204.472 440.808   1
  -8  -4  17 374.527 452.109   1
  -8  -4  18 10247.2 1385.01   1
  -8  -4  19 6730.75 1164.99   1
  -8  -4  20 1525.48 680.847   1
  -8  -4  21-570.642 525.517   1
  -8  -4  22 1089.63 667.995   1
   8   4  23 687.675 347.259   3
  -8  -4  23 992.336 572.850   1
   8   4  24 1930.46 781.884   3
  -8  -4  24 2.29009 486.454   1
   8   4  25 2526.91 845.787   3
  -8  -4  25 1088.46 666.999   1
   8   5  -7 708.029 166.936   3
   8   5  -7 392.025 311.482   2
   8   5  -6 2545.75 338.146   3
   8   5  -6 1959.22 566.932   2
   8   5  -5 1620.02 306.356   3
   8   5  -5 1976.66 606.728   2
   8  -5   4 4393.11 631.403   2
   8   5  -4 5670.56 949.989   2
   8   5  -4 5221.53 555.242   3
   8   5  -3 12929.9 1355.79   2
   8  -5   3 12757.4 1038.72   2
   8   5  -3 14188.2 937.326   3
   8   5  -2 10653.4 852.549   3
   8   5  -2 10786.2 1205.47   2
   8  -5   2 10030.5 922.211   2
   8   5  -1 1828.53 544.608   2
   8  -5   1 1944.23 406.813   2
   8   5  -1 2375.92 449.780   3
   8   5   0-130.068 323.704   2
   8  -5   0-464.874 360.494   2
   8   5   0 70.9012 188.325   3
   8   5   1 2621.55 648.948   2
   8   5   1 3364.68 564.097   3
   8  -5  -1 1543.31 339.970   2
   8   5   2 12001.1 1013.56   3
   8  -5  -2 11962.3 993.251   2
   8   5   2 11464.1 1224.17   2
   8   5   3 16599.6 1208.04   3
   8  -5  -3 14391.3 1113.85   2
   8   5   3 13911.4 1318.05   2
   8   5   4 3989.35 706.489   2
   8   5   4 4165.71 637.505   3
   8  -5  -4 4290.48 661.110   2
   8   5   5 2403.98 591.126   2
   8   5   5 2046.21 491.719   3
   8   5   6 1811.31 509.953   2
   8   5   6 2370.07 522.589   3
   8   5   7 1588.66 518.370   2
   8   5   7 1068.63 413.368   3
   8   5   8 128.880 286.035   3
   8   5   9 2793.39 633.613   3
   8   5  10 5730.33 833.371   3
   8   5  11 1936.18 578.225   3
  -8  -5  11 1097.90 483.487   1
   8   5  12 2710.86 651.137   3
  -8  -5  12 2053.24 688.380   1
  -8  -5  13 5782.16 1060.30   1
   8   5  13 3210.54 705.103   3
  -8  -5  14 1149.37 545.701   1
   8   5  14 1395.48 467.413   3
  -8  -5  15 4237.24 951.636   1
   8   5  15 4447.77 857.166   3
  -8  -5  16 2620.81 783.944   1
   8   5  16 4378.41 830.001   3
  -8  -5  17 956.456 583.163   1
   8   5  17 910.147 462.788   3
  -8  -5  18 3253.51 881.166   1
   8   5  18 3847.72 850.261   3
  -8  -5  19 562.638 479.435   1
   8   5  19 634.978 493.254   3
  -8  -5  20-451.927 559.144   1
   8   5  20-298.915 295.514   3
  -8  -5  21 5421.16 1245.65   1
   8   5  21 6296.20 1093.39   3
  -8  -5  22 6234.52 1259.82   1
   8   5  22 8969.46 1348.61   3
  -8  -5  23 5054.72 1185.09   1
   8   5  23 2523.11 727.126   3
  -8  -5  24-253.516 465.726   1
   8   5  24 121.968 377.835   3
   8   6  -8 3064.27 806.872   2
   8   6  -7 3674.42 835.360   2
   8   6  -6 4968.77 508.160   3
   8   6  -6 4116.41 883.184   2
   8   6  -5 494.370 215.932   3
   8   6  -5 385.082 429.712   2
   8   6  -4 3683.02 516.071   3
   8   6  -4 3778.84 797.846   2
   8   6  -3 11277.9 1292.34   2
   8   6  -3 9696.32 814.085   3
   8   6  -2 3415.94 796.927   2
   8   6  -2 3987.46 572.318   3
   8  -6   2 4111.92 600.415   2
   8   6  -1-135.222 343.795   2
   8  -6   1 251.745 210.649   2
   8   6  -1 650.150 316.819   3
   8   6   0 4358.82 778.002   2
   8  -6   0 5386.03 673.873   2
   8   6   0 5467.68 696.862   3
   8  -6  -1-455.559 303.530   2
   8   6   1 403.443 414.830   2
   8   6   1 292.205 261.902   3
   8   6   2 4284.23 782.272   2
   8   6   2 4333.88 659.359   3
   8  -6  -2 4527.95 611.710   2
   8   6   3 10395.6 1002.31   3
   8  -6  -3 10132.4 917.947   2
   8   6   3 9900.65 1147.25   2
   8   6   4 4807.71 829.173   2
   8   6   4 4867.70 725.668   3
   8  -6  -4 5209.94 688.655   2
   8   6   5-414.455 342.791   2
   8   6   5 249.189 250.931   3
   8  -6  -5-142.640 215.645   2
   8   6   6 5332.24 764.129   3
   8   6   6 5121.07 863.531   2
   8   6   7 4212.71 742.892   3
   8   6   7 4667.94 813.539   2
   8   6   8 1593.20 458.800   3
   8   6   9 6319.94 879.840   3
   8   6  10 939.967 497.995   3
   8   6  11 1770.92 550.424   3
   8   6  12 2683.95 668.021   3
   8   6  13-412.628 336.807   3
   8   6  14 1949.70 611.594   3
   8   6  15 624.313 443.581   3
  -8  -6  15 741.559 539.042   1
   8   6  16 6932.64 1058.65   3
  -8  -6  16 5981.81 1204.51   1
  -8  -6  17 2617.08 803.099   1
   8   6  17 1867.24 602.944   3
  -8  -6  18 1737.31 716.399   1
   8   6  18 2138.40 626.358   3
  -8  -6  19 1333.98 682.604   1
   8   6  19 1699.37 570.426   3
  -8  -6  20 395.614 664.736   1
   8   6  20 2420.33 710.776   3
  -8  -6  21 2630.52 846.907   1
   8   6  21 2807.83 742.393   3
  -8  -6  22 1201.26 820.712   1
   8   6  22 1072.48 511.717   3
  -8  -6  23 572.431 622.473   1
   8   6  23 1057.92 596.124   3
   8   7  -9 5191.06 949.633   2
   8   7  -8 223.804 549.296   2
   8   7  -7 5014.75 957.259   2
   8   7  -6 1078.36 469.875   2
   8   7  -5 4921.92 893.464   2
   8   7  -4 6689.75 700.789   3
   8   7  -4 5401.49 973.331   2
   8   7  -3 182.037 298.735   2
   8   7  -3 1638.98 403.340   3
   8   7  -2 2394.05 644.607   2
   8   7  -2 2883.44 517.329   3
   8   7  -1 2470.27 640.524   2
   8   7  -1 3571.30 594.264   3
   8   7   0 2153.88 629.089   2
   8   7   0 3512.60 591.330   3
   8  -7   0 4069.75 665.138   2
   8  -7  -1 3378.42 559.181   2
   8   7   1 2976.72 701.408   2
   8   7   1 2982.13 579.354   3
   8  -7  -2 2871.02 574.566   2
   8   7   2 2716.77 633.282   2
   8   7   2 2860.20 579.642   3
   8   7   3 1310.95 428.262   3
   8   7   3 1425.19 486.508   2
   8  -7  -3 1191.46 357.115   2
   8   7   4 5966.40 834.401   3
   8   7   4 4739.97 854.765   2
   8  -7  -4 6607.61 799.346   2
   8   7   5 5786.44 804.047   3
   8   7   5 4689.88 840.599   2
   8  -7  -5 7488.30 913.150   2
   8   7   6 2195.97 535.458   3
   8   7   6 1986.06 532.072   2
   8  -7  -6 1753.02 547.539   2
   8   7   7 3793.35 684.044   3
   8   7   8 360.493 292.036   3
   8   7   9 3300.89 698.256   3
   8   7  10 1600.62 497.232   3
   8   7  11 593.590 363.034   3
   8   7  12 10335.8 1189.45   3
   8   7  13 351.355 448.516   3
   8   7  14 860.606 465.062   3
   8   7  15 785.966 457.143   3
   8   7  16 410.518 415.537   3
   8   7  17 953.583 451.702   3
   8   7  18 683.283 387.589   3
   8   7  19 361.903 416.283   3
  -8  -7  19 470.103 801.685   1
  -8  -7  20 2192.99 962.131   1
   8   7  20 1879.74 710.620   3
  -8  -7  21 1393.34 764.126   1
   8   7  21 3153.83 749.570   3
   8   8 -11 3790.04 904.920   2
   8   8 -10 5.10610 442.139   2
   8   8  -9 2639.40 876.656   2
   8   8  -8 4658.15 945.471   2
   8   8  -7 523.426 456.416   2
   8   8  -6 228.530 371.737   2
   8   8  -5 591.946 473.431   2
   8   8  -4 5691.64 982.332   2
   8   8  -3 2896.33 736.861   2
   8   8  -2 382.515 419.091   2
   8   8  -2 2019.44 459.872   3
   8   8  -1 341.656 283.046   3
   8   8  -1 762.731 390.060   2
   8   8   0 6787.48 1031.03   2
   8   8   0 7742.25 901.241   3
   8   8   1 587.952 358.025   3
   8   8   1 477.532 306.577   2
   8   8   2 1121.69 349.474   3
   8   8   2 429.683 442.758   2
   8   8   3 2667.67 556.730   3
   8   8   3 2682.98 706.656   2
   8   8   4 5300.75 797.641   3
   8   8   4 6660.70 1022.17   2
   8   8   5 897.532 422.616   3
   8   8   5 1316.06 568.958   2
   8   8   6 1145.23 446.847   3
   8   8   7 1290.59 483.351   3
   8   8   8 4416.52 815.725   3
   8   8   9 4138.22 817.905   3
   8   8  10-75.6528 304.494   3
   8   8  11 3983.40 805.559   3
   8   8  12 984.309 496.455   3
   8   8  13 174.442 270.250   3
   8   8  14 256.445 403.913   3
   8   8  15 4476.25 913.049   3
   8   8  16 6143.69 1034.83   3
   8   8  17 2137.52 649.896   3
   8   8  18-503.522 433.820   3
   8   8  19 2155.21 655.977   3
   8   9 -13 2723.18 901.992   2
   8   9 -12 4755.25 1088.78   2
   8   9 -11 1377.73 557.419   2
   8   9 -10 3210.71 914.687   2
   8   9  -9 875.734 718.371   2
   8   9  -8 2654.18 828.180   2
   8   9  -7-77.8708 408.126   2
   8   9  -6 670.887 356.750   2
   8   9  -5 339.843 425.174   2
   8   9  -4 6489.67 1067.60   2
   8   9  -3 438.878 400.792   2
   8   9  -2 892.381 555.638   2
   8   9  -1 4328.56 1055.22   2
   8   9   0 16297.2 1357.59   3
   8   9   0 13942.4 1541.04   2
   8   9   1 4036.08 691.376   3
   8   9   1 3021.65 951.084   2
   8   9   2 984.180 407.093   3
   8   9   2 671.887 498.789   2
   8   9   3 1454.58 459.735   3
   8   9   3 1584.36 586.679   2
   8   9   4 7139.48 972.198   3
   8   9   4 6572.89 1039.32   2
   8   9   5 1105.66 418.194   3
   8   9   6 116.588 323.001   3
   8   9   7 1206.29 505.727   3
   8   9   8 2641.47 639.728   3
   8   9   9 1577.15 515.066   3
   8   9  10 1482.55 534.036   3
   8   9  11 378.736 288.334   3
   8   9  12 5073.78 905.007   3
   8   9  13 3290.52 791.222   3
   8   9  14 1734.54 601.948   3
   8   9  15 3046.30 741.932   3
   8  10 -11 1365.67 710.642   2
   8  10 -10 2767.74 864.779   2
   8  10  -9 309.333 516.312   2
   8  10  -8 1670.18 621.395   2
   8  10  -7 607.986 639.138   2
   8  10  -6 3154.89 802.842   2
   8  10  -5 1619.17 693.822   2
   8  10  -4 1112.97 567.271   2
   8  10  -3 1110.96 483.755   2
   8  10  -2 1009.79 583.835   2
   8  10  -1 2488.95 735.571   2
   8  10   0 1271.06 635.709   2
   8  10   1 2346.51 644.109   2
   8  10   2 1629.21 595.299   2
   8  10   2 1487.55 532.792   3
   8  10   3 2426.51 686.859   2
   8  10   3 1925.62 616.747   3
   8  10   4 1125.24 475.435   3
   8  10   5 1457.19 538.776   3
   8  10   6 2805.75 661.805   3
   8  10   7 28.1243 274.644   3
   8  10   8 996.728 386.284   3
   8  10   9 1109.71 628.525   3
   8  10  10 1477.09 623.613   3
   8  10  11 2592.70 680.633   3
  -9   0   0 165.468 221.361   1
   9   0   0-354.256 244.255   2
   9   0  -1 14744.3 1329.84   2
   9   0   1 14604.7 1302.29   2
  -9   0   1 17528.9 1289.57   1
  -9   0  -1 14993.0 1156.39   1
  -9   0   2 1625.00 419.803   1
   9   0   2 1110.16 400.298   2
   9   0  -2 906.670 449.058   2
   9   0   3-364.322 390.514   2
  -9   0   3 16.1586 240.570   1
   9   0  -3-138.602 330.797   2
   9   0   4 1136.29 445.451   2
  -9   0   4 1095.79 388.107   1
   9   0  -4 1017.37 394.483   2
   9   0   5 4249.38 740.267   2
  -9   0   5 4405.61 735.698   1
   9   0  -5 3375.27 743.102   2
   9   0  -6 33272.3 1807.89   3
   9   0   6 34560.4 2074.31   2
  -9   0   6 32739.8 1933.16   1
   9   0   7 24591.3 1773.42   2
  -9   0   7 26057.0 1743.51   1
  -9   0   8 1162.36 440.433   1
   9   0   8 1684.32 565.436   2
   9   0  -8 1031.90 330.566   3
  -9   0   9 1396.16 481.426   1
  -9   0  10 3419.43 696.102   1
  -9   0  11 2265.36 631.224   1
  -9   0  12 1454.80 529.591   1
  -9   0  13 1787.39 520.641   1
  -9   0  14 145.279 324.715   1
  -9   0  15 40.5898 396.157   1
  -9   0  16 186.702 374.438   1
  -9   0  17 1857.90 620.925   1
  -9   0  18 11456.2 1380.45   1
  -9   0  19 3538.09 787.406   1
  -9   0  20-30.4074 360.065   1
  -9   0  21 850.638 591.700   1
  -9   0  22 2385.19 780.349   1
  -9   0  23-183.984 369.820   1
  -9   0  24 1779.08 724.816   1
  -9   0  25-254.904 403.547   1
  -9   1  25 2380.25 810.861   1
  -9   1  24 2552.04 829.047   1
  -9   1  23-137.984 372.998   1
  -9   1  22 6929.03 1155.41   1
  -9   1  21 2003.50 639.771   1
  -9   1  20 2569.68 743.080   1
  -9   1  19 4059.47 829.260   1
  -9   1  18-619.749 392.497   1
  -9   1  17 1243.39 542.587   1
  -9   1  16 1396.67 550.122   1
  -9   1  15 5683.45 965.700   1
  -9   1  14 10761.0 1231.71   1
  -9   1  13 1999.79 548.077   1
  -9   1  12 3273.77 696.062   1
  -9   1  11 646.286 378.869   1
  -9   1  10 6102.38 943.670   1
  -9   1   9 938.944 444.284   1
  -9   1   8 456.871 300.423   1
   9  -1   7 3089.59 686.510   2
  -9   1   7 2645.31 653.159   1
   9  -1   6 1188.08 515.145   2
  -9   1   6 1527.30 490.814   1
   9  -1   5 4062.76 696.368   2
  -9  -1  -5 3917.01 567.309   1
  -9   1   5 4147.47 718.137   1
   9   1  -5 5282.22 910.580   2
   9  -1   4 55.3834 282.447   2
  -9  -1  -4 1181.02 347.621   1
   9   1  -4 967.835 462.129   2
   9   1  -3 10801.7 1197.17   2
   9  -1   3 10435.4 1091.55   2
  -9  -1  -3 10453.3 912.335   1
   9  -1   2 4322.83 723.595   2
  -9  -1  -2 5499.18 711.828   1
   9   1  -2 5443.18 869.079   2
   9  -1   1-127.332 292.555   2
  -9  -1  -1 620.649 291.832   1
   9   1  -1 293.377 263.538   2
   9  -1   0 7967.96 937.755   2
   9   1   0 8729.82 1034.94   2
  -9  -1   0 9934.42 950.329   1
   9   1   1 163.462 330.588   2
   9  -1  -1-355.158 291.615   2
   9   1   2 4761.54 799.938   2
  -9  -1   2 4162.66 660.284   1
   9  -1  -2 3361.49 636.365   2
   9  -1  -3 12260.4 1167.98   2
   9   1   3 11006.3 1176.23   2
  -9  -1   3 13483.4 1166.35   1
   9   1   4 114.751 266.363   2
  -9  -1   4 1273.67 449.850   1
   9  -1  -4 749.320 383.941   2
   9   1   5 3866.74 742.394   2
  -9  -1   5 4002.31 760.678   1
   9  -1  -5 4902.89 863.221   3
   9   1   6 806.356 378.761   2
  -9  -1   6 805.174 375.817   1
   9  -1  -6 1119.11 405.961   3
   9   1   7 1720.29 484.994   2
  -9  -1   7 1694.86 476.457   1
   9  -1  -7 1228.20 361.276   3
  -9  -1   8 710.844 322.359   1
   9   1   8 243.154 397.932   2
   9  -1  -8 523.853 283.127   3
  -9  -1   9 1149.08 508.668   1
  -9  -1  10 4908.61 853.655   1
  -9  -1  11 433.570 294.023   1
  -9  -1  12 3852.64 763.349   1
  -9  -1  13 1395.90 523.425   1
  -9  -1  14 9263.36 1214.53   1
  -9  -1  15 2978.00 766.400   1
  -9  -1  16 1487.98 612.701   1
  -9  -1  17 685.931 483.281   1
  -9  -1  18 448.027 453.017   1
  -9  -1  19 2847.85 795.557   1
  -9  -1  20 3368.72 836.682   1
  -9  -1  21 2681.13 815.566   1
  -9  -1  22 7775.46 1266.63   1
  -9  -1  23 569.518 511.726   1
  -9  -1  24 2202.05 797.381   1
  -9  -1  25 1532.73 616.488   1
  -9  -2  -9 3151.90 417.849   1
  -9  -2  -8 3667.42 481.797   1
   9  -2   7 5925.59 682.415   1
   9  -2   7 7454.78 942.201   2
  -9  -2  -7 5549.84 618.269   1
   9  -2   6 5854.14 831.891   2
   9  -2   6 5482.34 678.688   1
  -9  -2  -6 4967.32 596.599   1
   9  -2   5-53.8442 172.113   1
   9  -2   5 69.6800 229.410   2
  -9  -2  -5 13.8472 197.917   1
   9   2  -5 540.117 407.286   2
   9  -2   4 7432.14 794.915   1
   9  -2   4 7876.50 940.401   2
  -9  -2  -4 8319.03 800.978   1
   9   2  -4 7709.42 1068.94   2
   9  -2   3 1885.55 501.358   2
  -9  -2  -3 2170.40 483.484   1
   9   2  -3 2011.47 542.494   2
  -9  -2  -2 685.039 264.612   1
   9  -2   2 669.529 353.775   2
   9  -2   1 7648.54 931.458   2
  -9  -2  -1 7339.64 831.924   1
   9   2  -1 7121.13 963.938   2
   9  -2   0 565.623 370.846   2
   9   2   0 1257.32 494.071   2
  -9  -2   0 1721.98 450.912   1
   9   2   1 7726.20 1003.22   2
   9  -2  -1 9018.54 977.070   2
  -9  -2   1 6630.22 790.254   1
   9   2   2 1098.88 507.901   2
   9  -2  -2 1204.02 408.672   2
  -9  -2   2 1304.27 443.667   1
   9   2   3 2117.95 528.658   2
   9  -2  -3 1597.75 526.205   2
  -9  -2   3 2410.77 492.112   1
   9  -2  -4 8702.82 1041.93   2
  -9  -2   4 7747.92 911.963   1
   9   2   4 8875.62 1085.30   2
   9   2   5 432.789 378.303   2
  -9  -2   5 872.141 424.187   1
   9   2   6 6098.23 914.442   2
  -9  -2   6 5473.41 816.596   1
   9   2   7 3949.73 737.443   2
  -9  -2   7 3920.96 695.747   1
   9   2   8 4649.23 798.680   2
  -9  -2   8 5088.64 836.771   1
  -9  -2   9 1846.11 554.765   1
  -9  -2  10 1535.75 520.803   1
  -9  -2  11 3241.35 759.867   1
  -9  -2  12 77.8726 362.361   1
  -9  -2  13 2219.90 645.339   1
  -9  -2  14 1908.02 600.241   1
  -9  -2  15 186.983 321.966   1
  -9  -2  16 3847.23 811.438   1
  -9  -2  17 726.742 432.067   1
  -9  -2  18 4236.28 919.490   1
  -9  -2  19 3171.16 749.467   1
  -9  -2  20 1027.51 614.570   1
  -9  -2  21 2589.12 734.840   1
  -9  -2  22 1804.11 663.540   1
  -9  -2  23-390.972 506.080   1
  -9  -2  24 1182.05 607.940   1
  -9  -3 -10 1517.50 292.974   1
  -9  -3  -9 366.947 222.127   1
   9  -3   9 425.898 269.867   1
   9  -3   8 873.159 305.642   1
  -9  -3  -8 1024.02 303.327   1
   9   3  -7 4174.91 418.927   3
   9  -3   7 5560.65 684.314   1
  -9  -3  -7 5161.59 596.360   1
   9  -3   6 136.204 250.549   1
   9  -3   6 678.563 360.054   2
  -9  -3  -6 415.415 257.982   1
   9   3  -6-117.466 378.133   2
   9  -3   5 3646.23 651.999   2
  -9  -3  -5 4326.34 600.421   1
   9   3  -5 4516.12 847.273   2
   9  -3   4 2701.89 586.303   2
  -9  -3  -4 2404.73 477.361   1
   9   3  -4 1968.63 599.875   2
   9  -3   3 4484.29 684.468   2
  -9  -3  -3 5947.66 737.028   1
   9   3  -3 4764.64 873.346   2
   9  -3   2 751.888 354.398   2
  -9  -3  -2 1222.93 384.332   1
   9   3  -2 1349.16 532.664   2
   9  -3   1 59.4986 328.434   2
  -9  -3  -1 193.278 299.173   1
   9   3  -1 398.781 292.623   2
  -9  -3   0 20157.2 1396.89   1
   9   3   0 21133.6 1667.15   2
   9  -3   0 19982.2 1422.94   2
   9   3   1 1252.21 442.141   2
  -9  -3   1 1787.20 500.363   1
   9  -3  -1 1562.08 489.917   2
   9   3   2 1738.53 504.410   2
  -9  -3   2 2414.15 555.082   1
   9  -3  -2 1350.57 368.387   2
   9   3   3 5271.85 863.933   2
  -9  -3   3 5889.91 846.182   1
   9  -3  -3 4838.18 724.683   2
   9   3   4 2334.72 591.007   2
  -9  -3   4 2789.09 634.016   1
   9  -3  -4 2639.58 573.413   2
   9   3   5 3827.80 753.985   2
  -9  -3   5 4333.97 758.886   1
   9  -3  -5 3215.48 637.230   2
   9   3   6-96.5277 364.326   2
  -9  -3   6 31.0488 245.159   1
   9   3   7 6886.50 988.432   2
  -9  -3   7 6075.27 872.804   1
   9   3   8 1092.05 430.024   2
  -9  -3   8 1899.67 621.464   1
  -9  -3   9 909.634 436.888   1
  -9  -3  10 2744.55 664.458   1
  -9  -3  11 1089.91 472.343   1
  -9  -3  12 5355.38 970.719   1
  -9  -3  13 10291.8 1288.07   1
  -9  -3  14 6936.62 1079.22   1
  -9  -3  15 567.507 444.279   1
  -9  -3  16 839.614 506.101   1
  -9  -3  17 2985.96 790.669   1
  -9  -3  18 968.876 621.688   1
  -9  -3  19 1020.71 557.331   1
  -9  -3  20-50.2112 539.006   1
  -9  -3  21 1057.00 648.745   1
  -9  -3  22 2409.32 732.350   1
  -9  -3  23 916.415 544.686   1
  -9  -3  24 2252.42 892.693   1
  -9  -4  -9 11292.0 853.309   1
  -9  -4  -8 6684.82 704.757   1
  -9  -4  -7 5233.94 658.980   1
   9   4  -7 4973.08 989.346   2
   9   4  -6 568.305 219.088   3
   9   4  -6 146.555 419.558   2
  -9  -4  -5 114.123 209.080   1
   9   4  -5 216.310 210.149   3
   9  -4   5 164.993 298.123   2
   9   4  -5-401.154 508.461   2
   9   4  -4 7156.30 651.800   3
  -9  -4  -4 8081.05 855.160   1
   9  -4   4 6780.20 852.443   2
   9   4  -4 8299.63 1223.28   2
   9   4  -3 8754.95 767.785   3
  -9  -4  -3 8531.56 912.995   1
   9   4  -3 9387.02 1270.71   2
   9  -4   3 7458.49 874.183   2
  -9  -4  -2-214.064 253.532   1
   9  -4   2 292.362 236.539   2
   9   4  -2 462.076 244.160   3
   9   4  -2-340.159 363.644   2
   9   4  -1 775.171 453.825   2
   9  -4   1 553.391 274.465   2
  -9  -4  -1 540.089 311.354   1
   9   4  -1 613.535 248.955   3
   9   4   0-156.096 280.229   2
   9  -4   0 192.225 252.938   2
  -9  -4   0 445.705 272.911   1
   9   4   1 575.279 351.350   2
  -9  -4   1 970.002 435.956   1
   9  -4  -1 1632.73 442.343   2
   9   4   2 308.248 487.775   2
  -9  -4   2 0.57612 271.125   1
   9  -4  -2-13.0775 287.632   2
  -9  -4   3 7156.53 948.623   1
   9   4   3 7808.81 1089.18   2
   9  -4  -3 7572.65 912.197   2
  -9  -4   4 6613.85 912.306   1
   9   4   4 5698.02 914.128   2
   9  -4  -4 7024.06 897.229   2
  -9  -4   5-66.3570 292.409   1
   9   4   5 487.834 392.350   2
   9  -4  -5-100.948 266.625   2
  -9  -4   6 828.430 449.745   1
   9   4   6 1367.05 532.293   2
  -9  -4   7 4291.00 827.219   1
   9   4   7 4811.99 897.324   2
  -9  -4   8 6577.31 1015.57   1
   9   4   8 6435.92 975.732   2
  -9  -4   9 13271.3 1402.85   1
  -9  -4  10-44.1970 355.075   1
  -9  -4  11 384.807 423.849   1
  -9  -4  12-94.6828 383.622   1
  -9  -4  13 4393.24 908.943   1
  -9  -4  14 3560.73 827.108   1
  -9  -4  15 6791.20 1189.47   1
  -9  -4  16 8317.01 1268.14   1
  -9  -4  17-77.9968 399.891   1
  -9  -4  18 1126.89 677.133   1
  -9  -4  19-146.783 459.303   1
  -9  -4  20-98.6013 372.518   1
  -9  -4  21 6009.75 1205.82   1
  -9  -4  22 1544.15 767.990   1
  -9  -4  23 1612.74 714.469   1
  -9  -5  -9 890.212 389.186   1
  -9  -5  -8 8107.47 836.684   1
   9   5  -8 9561.32 1385.73   2
   9   5  -7 4657.65 1065.79   2
  -9  -5  -7 2014.30 444.326   1
   9   5  -6 997.589 631.216   2
  -9  -5  -6 1192.42 384.127   1
   9   5  -5 2287.96 694.134   2
   9   5  -4 4.53537 184.277   3
   9  -5   4-374.125 273.844   2
   9   5  -4-15.5174 374.398   2
   9   5  -3 950.464 311.326   3
   9  -5   3-46.4705 248.383   2
   9   5  -3 564.458 519.234   2
   9   5  -2 5172.33 644.126   3
   9  -5   2 5192.56 752.521   2
   9   5  -2 4694.75 896.331   2
   9   5  -1 3814.03 819.768   2
   9   5  -1 5949.20 700.435   3
   9  -5   1 5340.87 750.122   2
   9   5   0 8038.22 1097.04   2
   9   5   0 7970.46 828.626   3
  -9  -5   0 8489.08 1036.14   1
   9  -5   0 8139.84 898.275   2
   9  -5  -1 5140.72 720.148   2
   9   5   1 4507.04 863.584   2
   9   5   1 5327.38 704.542   3
  -9  -5   1 5633.24 875.466   1
   9   5   2 4688.88 880.223   2
   9   5   2 5276.73 719.635   3
  -9  -5   2 5842.95 894.888   1
   9  -5  -2 5342.18 744.489   2
   9   5   3 58.1751 320.137   2
   9   5   3 1647.58 451.126   3
   9  -5  -3 640.569 326.869   2
  -9  -5   3 1355.94 507.739   1
   9   5   4 515.899 306.576   2
   9   5   4-208.852 254.086   3
   9  -5  -4 501.864 272.727   2
  -9  -5   4-17.5445 370.191   1
   9   5   5 1434.53 506.722   2
   9   5   5 2143.01 530.406   3
   9  -5  -5 2188.03 492.603   2
  -9  -5   5 2874.46 726.595   1
  -9  -5   6 312.533 341.062   1
   9   5   6 499.307 337.286   2
   9   5   6 1158.21 447.494   3
  -9  -5   7 1599.66 564.986   1
   9   5   7 2995.71 711.220   2
   9   5   7 3387.06 670.410   3
  -9  -5   8 8629.83 1200.08   1
   9   5   8 8410.07 998.036   3
  -9  -5   9 490.209 457.558   1
   9   5   9 672.771 408.824   3
  -9  -5  10 2003.86 664.021   1
   9   5  10 2330.44 656.841   3
  -9  -5  11 391.103 411.067   1
   9   5  11 134.954 309.347   3
  -9  -5  12 6201.34 1049.34   1
   9   5  12 5798.21 924.676   3
  -9  -5  13 2777.94 848.761   1
   9   5  13 3072.79 728.222   3
  -9  -5  14-203.127 543.420   1
   9   5  14-277.285 377.921   3
  -9  -5  15 1060.47 542.066   1
   9   5  15 2326.40 672.832   3
  -9  -5  16 1345.94 720.909   1
   9   5  16 1808.01 668.470   3
  -9  -5  17 1995.40 809.178   1
   9   5  17 2883.16 693.576   3
  -9  -5  18 927.444 692.353   1
   9   5  18 271.550 458.269   3
  -9  -5  19-441.390 577.188   1
   9   5  19 362.566 376.689   3
  -9  -5  20 718.185 576.752   1
   9   5  20 485.986 400.674   3
  -9  -5  21-214.908 454.156   1
   9   5  21 1042.61 534.760   3
  -9  -5  22 1622.01 751.421   1
   9   5  22 1061.32 593.519   3
   9   6  -9 807.284 545.560   2
   9   6  -8 2290.75 717.901   2
   9   6  -7 80.2692 527.773   2
   9   6  -6 2820.74 671.275   2
   9   6  -5 1213.49 611.346   2
   9   6  -4 2900.24 818.464   2
   9   6  -3 3225.91 787.486   2
   9   6  -2 810.122 466.545   2
   9   6  -2 403.243 267.671   3
   9  -6   2 7.30085 218.644   2
   9   6  -1 829.179 463.929   2
   9  -6   1 622.629 305.386   2
   9   6  -1 249.141 190.206   3
   9   6   0 513.372 417.630   2
   9  -6   0 165.936 251.307   2
   9   6   0 827.415 321.566   3
   9  -6  -1 616.182 304.869   2
   9   6   1 689.313 418.793   2
   9   6   1 340.315 226.420   3
   9  -6  -2 332.662 275.560   2
   9   6   2-50.2683 301.564   2
   9   6   2 419.522 294.319   3
   9   6   3 1334.52 548.130   2
   9   6   3 1899.47 490.835   3
   9  -6  -3 1902.58 536.463   2
   9   6   4 3093.14 728.066   2
   9   6   4 2772.12 592.722   3
   9  -6  -4 2345.72 533.550   2
   9   6   5 1134.53 429.525   2
   9   6   5 929.933 412.521   3
   9  -6  -5 534.043 386.665   2
   9   6   6 3649.35 678.696   3
   9   6   6 3645.89 731.961   2
   9  -6  -6 3124.75 648.402   2
   9   6   7 717.684 446.821   3
   9   6   7 186.394 351.280   2
   9   6   8 3147.55 680.700   3
   9   6   9 892.189 419.650   3
   9   6  10 1045.95 477.585   3
  -9  -6  10 525.365 472.101   1
   9   6  11 3965.96 815.341   3
  -9  -6  11 4610.65 977.433   1
  -9  -6  12 1813.38 619.780   1
   9   6  12 2144.32 642.891   3
  -9  -6  13 3902.87 936.437   1
   9   6  13 1832.62 562.623   3
  -9  -6  14 367.201 468.442   1
   9   6  14-104.183 311.349   3
  -9  -6  15 1607.53 571.826   1
   9   6  15 1042.16 571.552   3
  -9  -6  16 1635.75 563.986   1
   9   6  16 1603.18 568.283   3
  -9  -6  17 899.849 633.797   1
   9   6  17 416.457 463.059   3
  -9  -6  18 3137.39 899.964   1
   9   6  18 3357.10 813.759   3
  -9  -6  19 2936.98 961.982   1
   9   6  19 4395.52 878.386   3
  -9  -6  20 1528.13 751.927   1
   9   6  20 364.192 421.447   3
   9   7 -11 2851.14 884.375   2
   9   7 -10 9104.29 1446.37   2
   9   7  -9 2302.51 853.261   2
   9   7  -8 4645.52 1068.67   2
   9   7  -7 1446.86 621.891   2
   9   7  -6 941.927 571.125   2
   9   7  -5 618.809 508.732   2
   9   7  -4-177.915 383.546   2
   9   7  -3 2336.26 861.171   2
   9   7  -2 7463.22 1134.69   2
   9   7  -1-287.758 330.930   2
   9   7   0 3465.26 770.894   2
   9   7   0 3764.67 624.919   3
   9   7   1-10.5878 365.236   2
   9   7   1 1083.55 391.997   3
   9   7   2 7749.68 1090.24   2
   9   7   2 7507.53 915.965   3
   9   7   3 3323.78 642.867   3
   9   7   3 2670.34 827.398   2
   9   7   4 355.836 371.537   3
   9   7   4-564.184 325.998   2
   9   7   5 175.826 253.564   3
   9   7   5 159.955 308.390   2
   9   7   6 1558.27 441.481   3
   9   7   6 1357.14 587.692   2
   9   7   7 1852.14 551.547   3
   9   7   8 3616.33 714.584   3
   9   7   9 1445.45 499.522   3
   9   7  10 9631.98 1191.43   3
   9   7  11 3577.30 748.044   3
   9   7  12 622.798 346.918   3
   9   7  13 1092.12 583.289   3
   9   7  14 526.505 446.638   3
   9   7  15 3621.67 776.790   3
  -9  -7  15 679.862 618.688   1
   9   7  16 4812.83 892.093   3
  -9  -7  16 3467.42 1123.55   1
  -9  -7  17-670.612 583.153   1
   9   7  17 980.145 495.921   3
  -9  -7  18 1265.52 620.506   1
   9   7  18 920.800 597.059   3
   9   8 -13 7686.55 1448.33   2
   9   8 -12 1329.47 717.250   2
   9   8 -11 2994.86 928.996   2
   9   8 -10 358.270 473.520   2
   9   8  -9 637.616 627.211   2
   9   8  -8 914.648 573.552   2
   9   8  -7 806.282 605.013   2
   9   8  -6 5781.28 1137.13   2
   9   8  -5 1887.38 619.380   2
   9   8  -4-262.184 431.434   2
   9   8  -3 441.910 410.361   2
   9   8  -2-77.3560 329.596   2
   9   8  -1 1046.10 536.216   2
   9   8   0 595.687 443.869   2
   9   8   1 478.687 442.449   2
   9   8   2 1332.87 425.158   3
   9   8   2 902.061 458.042   2
   9   8   3 277.348 289.325   3
   9   8   3 138.212 421.034   2
   9   8   4 189.454 283.846   3
   9   8   4 715.223 464.308   2
   9   8   5 3859.55 752.821   3
   9   8   5 2583.93 657.274   2
   9   8   6 6665.09 949.482   3
   9   8   7 445.048 398.641   3
   9   8   8 464.159 411.909   3
   9   8   9 653.496 457.336   3
   9   8  10 1967.18 616.072   3
   9   8  11 3480.95 763.882   3
   9   8  12 340.045 503.056   3
   9   8  13 7648.34 1112.72   3
   9   8  14 1453.97 578.604   3
   9   8  15 2348.98 700.187   3
   9   9 -11 467.257 669.415   2
   9   9 -10 3393.23 893.888   2
   9   9  -9 3564.83 947.589   2
   9   9  -8 475.995 459.057   2
   9   9  -7 1275.02 590.172   2
   9   9  -6-489.954 475.255   2
   9   9  -5 3020.57 805.711   2
   9   9  -4 366.178 526.963   2
   9   9  -3 2733.06 1028.30   2
   9   9  -2 8900.54 1317.61   2
   9   9  -1 467.408 743.873   2
   9   9   0 121.466 353.298   2
   9   9   1 515.107 657.095   2
   9   9   2 8308.67 1245.68   2
   9   9   3 3531.76 971.819   2
   9   9   4-81.9486 295.389   3
   9   9   4 652.529 574.389   2
   9   9   5 4513.97 828.248   3
   9   9   6 348.942 343.737   3
   9   9   7 1559.80 586.692   3
   9   9   8 246.022 416.120   3
   9   9   9 3258.68 737.192   3
   9   9  10 3571.67 745.357   3
   9   9  11 1133.65 563.665   3
   9  10  -2-471.013 373.707   2
   9  10  -1 588.125 518.321   2
   9  10   0-75.6288 308.754   2
   9  10   1 237.602 328.716   2
   9  10   2 981.525 524.885   2
  10   0   0 1865.74 562.686   2
  10   0  -1 9269.93 1115.66   2
  10   0   1 10527.4 1188.89   2
 -10   0   1 9753.82 1034.18   1
  10   0   2 294.098 467.065   2
 -10   0   2 1149.17 480.823   1
  10   0  -2 243.895 500.004   2
  10   0  -3 12214.7 1272.53   2
  10   0   3 12826.7 1292.12   2
 -10   0   3 13112.8 1225.20   1
  10   0   4 4470.90 813.578   2
 -10   0   4 3644.93 719.566   1
  10   0  -4 3576.56 814.605   2
  10   0   5 3775.22 787.029   2
 -10   0   5 2049.02 545.630   1
  10   0  -5 1823.63 633.262   2
 -10   0   6-11.7337 259.546   1
  10   0   6 620.926 398.101   2
  10   0  -6-95.9813 401.828   2
  10   0   7 796.643 357.083   2
 -10   0   7 1211.46 380.596   1
  10   0   8 6507.23 939.036   2
 -10   0   8 6145.68 909.521   1
 -10   0   9 568.780 397.247   1
 -10   0  10-56.0218 271.458   1
 -10   0  11 1187.26 472.579   1
 -10   0  12 4134.16 843.047   1
 -10   0  13 13644.4 1480.58   1
 -10   0  14 2137.39 651.173   1
 -10   0  15 2357.20 672.708   1
 -10   0  16 3625.96 835.245   1
 -10   0  17 1589.80 621.742   1
 -10   0  18 126.589 434.099   1
 -10   0  19 1283.22 543.476   1
 -10   0  20 1212.01 615.516   1
 -10   0  21 2821.30 805.838   1
 -10   0  22 1252.74 653.901   1
 -10   1  22 926.106 597.113   1
 -10   1  21 1432.98 627.117   1
 -10   1  20 747.951 486.178   1
 -10   1  19 1002.85 576.797   1
 -10   1  18 2247.48 741.505   1
 -10   1  17 1624.24 591.604   1
 -10   1  16 5127.10 992.415   1
 -10   1  15 371.655 414.208   1
 -10   1  14 1119.27 473.423   1
 -10   1  13 3238.66 804.386   1
 -10   1  12 13462.3 1427.62   1
 -10   1  11 851.671 500.392   1
 -10   1  10 1533.76 612.557   1
 -10   1   9 3172.44 689.804   1
  10  -1   7 5895.01 949.229   2
  10   1  -7 6038.22 1058.50   2
  10  -1   6 153.884 314.081   2
  10   1  -6-195.875 354.142   2
  10  -1   5 351.364 328.592   2
  10   1  -5 228.416 385.678   2
 -10  -1  -4 4000.54 602.762   1
  10  -1   4 4181.38 721.140   2
  10   1  -4 4762.60 880.975   2
  10  -1   3 1271.09 501.439   2
 -10  -1  -3 1001.24 390.038   1
  10   1  -3 861.565 528.901   2
  10  -1   2 2871.66 642.131   2
  10   1  -2 3551.35 774.834   2
 -10  -1  -2 4549.98 687.029   1
  10  -1   1 1021.77 488.778   2
 -10  -1  -1 966.074 400.525   1
  10   1  -1 673.146 435.199   2
  10   1   0 3646.74 781.816   2
  10  -1   0 4630.64 810.327   2
 -10  -1   0 5284.85 763.470   1
  10   1   1 1194.05 471.755   2
 -10  -1   1 1885.00 528.941   1
  10  -1  -1 1464.94 521.260   2
 -10  -1   2 3338.86 643.933   1
  10   1   2 2365.99 608.314   2
  10  -1  -2 2381.51 615.771   2
  10   1   3 1354.98 484.130   2
  10  -1  -3 1168.99 490.625   2
 -10  -1   3 1665.95 494.836   1
  10   1   4 3268.14 776.674   2
  10  -1  -4 3347.34 737.798   2
 -10  -1   4 3883.74 712.523   1
  10   1   5 967.358 509.907   2
  10  -1  -5 850.321 503.636   2
 -10  -1   5 1168.25 440.847   1
  10   1   6-397.190 374.904   2
  10  -1  -6 71.1676 316.666   2
 -10  -1   6 238.109 343.305   1
  10   1   7 6471.92 975.453   2
 -10  -1   7 5031.85 809.786   1
  10   1   8 2473.12 694.118   2
 -10  -1   8 1264.00 445.213   1
 -10  -1   9 2571.14 654.271   1
 -10  -1  10 1263.97 599.263   1
 -10  -1  11 813.312 322.006   1
 -10  -1  12 11977.5 1406.22   1
 -10  -1  13 2976.41 745.174   1
 -10  -1  14 1184.47 554.401   1
 -10  -1  15 745.914 499.249   1
 -10  -1  16 5957.20 990.384   1
 -10  -1  17 1533.79 562.940   1
 -10  -1  18 435.320 392.681   1
 -10  -1  19 540.567 430.661   1
 -10  -1  20 1215.04 751.389   1
 -10  -1  21 1589.30 670.810   1
 -10  -1  22 720.040 504.948   1
  10   2  -7 683.602 497.732   2
 -10  -2  -7 546.956 280.013   1
 -10  -2  -6 3871.35 577.626   1
  10  -2   6 5204.88 809.135   2
  10   2  -6 4775.90 1017.08   2
  10  -2   5 5995.14 895.382   2
 -10  -2  -5 5449.94 700.381   1
  10   2  -5 6567.04 1078.02   2
  10  -2   4 1629.88 463.522   2
 -10  -2  -4 1883.89 453.260   1
  10   2  -4 1602.20 496.721   2
  10  -2   3 1440.68 476.221   2
 -10  -2  -3 709.951 299.235   1
  10  -2   2 1810.55 519.787   2
 -10  -2  -2 1807.18 444.471   1
  10   2  -2 890.695 472.069   2
  10   2  -1 5135.12 892.200   2
  10  -2   1 5493.66 843.359   2
 -10  -2  -1 6596.49 812.801   1
  10   2   0 186.081 417.427   2
  10  -2   0-27.6955 267.146   2
 -10  -2   0 180.491 246.826   1
  10   2   1 6764.75 977.068   2
 -10  -2   1 5837.04 806.957   1
  10  -2  -1 4661.63 799.911   2
  10   2   2 455.334 268.699   2
 -10  -2   2 2175.77 540.482   1
  10  -2  -2 1819.49 580.994   2
  10   2   3 1170.05 536.780   2
 -10  -2   3 248.475 289.915   1
  10  -2  -3 316.749 298.728   2
 -10  -2   4 797.979 368.523   1
  10   2   4 2016.30 584.452   2
  10  -2  -4 1736.56 630.477   2
  10   2   5 7431.93 1071.63   2
 -10  -2   5 7952.14 1009.75   1
  10  -2  -5 8025.92 1097.74   2
 -10  -2   6 4752.87 843.333   1
  10   2   6 4827.69 937.717   2
  10  -2  -6 3681.86 825.741   2
 -10  -2   7 382.736 341.225   1
  10   2   7 1031.95 485.027   2
 -10  -2   8 2789.12 670.801   1
  10   2   8 3866.19 784.548   2
 -10  -2   9 1449.48 558.042   1
 -10  -2  10 4019.94 786.543   1
 -10  -2  11 2572.27 644.558   1
 -10  -2  12 3236.87 742.996   1
 -10  -2  13 5156.84 916.818   1
 -10  -2  14 3490.91 800.644   1
 -10  -2  15 2373.18 689.163   1
 -10  -2  16 82.1067 375.591   1
 -10  -2  17 809.820 522.016   1
 -10  -2  18 2774.92 795.636   1
 -10  -2  19 3119.96 821.070   1
 -10  -2  20-281.044 414.538   1
 -10  -2  21 364.801 364.364   1
  10   3  -8 3372.80 1035.84   2
 -10  -3  -7 3249.78 518.684   1
  10   3  -7 4157.77 937.547   2
 -10  -3  -6 2707.01 489.062   1
  10  -3   6 2916.48 605.469   2
  10   3  -6 1855.78 612.509   2
 -10  -3  -5 1624.76 423.411   1
  10  -3   5 1599.15 415.727   2
  10   3  -5 2521.64 712.504   2
 -10  -3  -4 740.795 287.646   1
  10  -3   4 607.414 391.326   2
  10   3  -4-351.699 410.757   2
  10  -3   3 6058.49 872.032   2
  10   3  -3 5683.83 962.178   2
 -10  -3  -3 5980.80 774.611   1
  10  -3   2 4956.63 782.627   2
 -10  -3  -2 6655.60 850.196   1
  10   3  -2 6082.42 983.793   2
  10   3  -1 4693.59 878.651   2
  10  -3   1 4588.73 734.032   2
 -10  -3  -1 4338.43 690.143   1
  10   3   0 573.282 431.565   2
  10  -3   0 1002.63 402.887   2
 -10  -3   0 920.509 383.487   1
  10  -3  -1 4301.22 782.879   2
  10   3   1 4154.28 811.597   2
 -10  -3   1 5245.24 772.719   1
  10   3   2 6121.80 1023.16   2
 -10  -3   2 5329.22 802.961   1
  10  -3  -2 4773.83 785.254   2
  10   3   3 4541.91 877.799   2
 -10  -3   3 5350.96 832.435   1
  10  -3  -3 3761.48 687.732   2
  10   3   4 153.989 405.403   2
 -10  -3   4 115.606 333.870   1
  10  -3  -4-179.142 390.041   2
  10   3   5 2218.87 616.433   2
 -10  -3   5 1646.49 492.571   1
  10  -3  -5 3130.09 678.782   2
  10   3   6 3112.01 738.305   2
 -10  -3   6 2320.45 579.222   1
  10  -3  -6 2953.74 744.238   2
  10   3   7 3244.81 769.327   2
 -10  -3   7 4561.41 817.139   1
  10   3   8 2594.48 679.356   2
 -10  -3   8 2607.48 688.388   1
 -10  -3   9 894.508 392.471   1
 -10  -3  10 1749.35 535.483   1
 -10  -3  11 1296.88 550.463   1
 -10  -3  12 1514.04 524.152   1
 -10  -3  13 1722.36 525.178   1
 -10  -3  14 2767.15 774.076   1
 -10  -3  15 2639.82 730.808   1
 -10  -3  16 1840.92 662.421   1
 -10  -3  17-72.2528 337.310   1
 -10  -3  18 1453.68 682.947   1
 -10  -3  19 2795.60 756.062   1
 -10  -3  20 1666.29 691.622   1
 -10  -3  21 489.944 474.083   1
  10   4  -9 2918.98 864.367   2
  10   4  -8 734.791 607.638   2
  10   4  -7 800.471 745.281   2
 -10  -4  -6 7513.43 833.405   1
  10   4  -6 8744.45 1318.37   2
  10  -4   5 93.9691 282.211   2
 -10  -4  -5 905.747 387.061   1
  10   4  -5 778.314 516.409   2
  10  -4   4-174.948 277.568   2
 -10  -4  -4 501.447 305.677   1
  10   4  -4 314.410 468.462   2
  10  -4   3 2267.38 582.509   2
 -10  -4  -3 2884.64 542.790   1
  10   4  -3 2149.43 705.786   2
  10   4  -2 4351.64 893.090   2
  10  -4   2 3419.10 667.607   2
 -10  -4  -2 4144.11 716.070   1
  10   4  -2 4077.30 599.351   3
  10   4  -1 5918.55 990.294   2
  10  -4   1 4179.24 728.402   2
 -10  -4  -1 5154.40 803.287   1
  10   4  -1 5013.06 657.681   3
  10   4   0 2426.76 724.046   2
  10  -4   0 2572.10 609.785   2
 -10  -4   0 2312.32 592.215   1
  10  -4  -1 4951.32 772.862   2
  10   4   1 6414.41 1039.64   2
 -10  -4   1 6210.24 890.538   1
  10   4   2 3768.91 774.587   2
 -10  -4   2 4055.54 749.361   1
  10  -4  -2 2914.47 646.187   2
  10   4   3 1903.92 627.506   2
 -10  -4   3 2217.30 642.973   1
  10  -4  -3 2048.02 527.338   2
  10   4   4 763.328 475.634   2
 -10  -4   4 1205.49 495.198   1
  10  -4  -4 800.231 429.207   2
  10   4   5 346.831 464.937   2
 -10  -4   5 698.036 404.105   1
  10  -4  -5 966.581 497.776   2
  10   4   6 7522.23 1078.62   2
 -10  -4   6 8724.66 1121.74   1
  10  -4  -6 8352.13 1103.19   2
  10   4   7 1078.10 600.544   2
 -10  -4   7 358.683 335.958   1
  10  -4  -7 1340.28 628.249   2
 -10  -4   8 429.146 406.261   1
  10   4   8 1152.36 563.122   2
 -10  -4   9 3670.50 756.443   1
 -10  -4  10 3960.90 834.236   1
 -10  -4  11 1975.00 684.484   1
 -10  -4  12 1180.46 529.896   1
 -10  -4  13 1099.58 570.013   1
 -10  -4  14 726.356 563.158   1
 -10  -4  15 628.907 496.211   1
 -10  -4  16 821.902 511.879   1
 -10  -4  17 3249.47 861.120   1
 -10  -4  18 3531.60 924.523   1
 -10  -4  19 2368.72 698.244   1
 -10  -4  20 550.155 593.818   1
  10   5 -10 6202.32 1287.62   2
  10   5  -9 2307.02 776.418   2
  10   5  -8 193.588 614.325   2
  10   5  -7 7328.51 1265.76   2
 -10  -5  -6 575.165 309.335   1
  10   5  -6 864.346 578.611   2
 -10  -5  -5 1956.90 511.995   1
  10   5  -5 2758.14 914.709   2
 -10  -5  -4 5668.18 796.716   1
  10  -5   4 6697.31 923.624   2
  10   5  -4 7572.49 1274.22   2
 -10  -5  -3 1612.74 480.861   1
  10  -5   3 1639.86 508.958   2
  10   5  -3 2966.73 899.991   2
  10   5  -2 3404.67 747.589   2
 -10  -5  -2 3129.66 671.306   1
  10  -5   2 3218.55 676.988   2
 -10  -5  -1 1592.80 562.222   1
  10  -5   1 1016.39 407.804   2
  10   5  -1 1163.27 411.357   3
  10   5   0 975.533 512.558   2
  10  -5   0 1070.37 449.001   2
 -10  -5   0 1672.18 531.644   1
  10   5   0 1835.28 451.035   3
  10  -5  -1 1251.49 472.615   2
  10   5   1 1736.92 618.578   2
 -10  -5   1 1639.71 524.311   1
  10   5   1 1952.49 478.600   3
  10  -5  -2 1502.83 533.313   2
 -10  -5   2 1612.97 510.245   1
  10   5   2 246.449 353.506   2
  10   5   2 1389.90 430.751   3
 -10  -5   3 1141.33 431.067   1
  10   5   3 1275.57 607.210   2
  10   5   3 1810.60 488.834   3
  10  -5  -3 1586.45 488.429   2
 -10  -5   4 5510.23 931.878   1
  10   5   4 5242.81 1004.87   2
  10   5   4 6307.84 857.763   3
  10  -5  -4 5431.40 826.113   2
 -10  -5   5 1359.28 564.242   1
  10   5   5 1229.20 559.514   2
  10   5   5 1057.83 393.064   3
  10  -5  -5 2202.88 659.075   2
 -10  -5   6 942.951 476.204   1
  10   5   6 1271.96 568.769   2
  10   5   6 747.198 378.882   3
  10  -5  -6 873.191 499.045   2
 -10  -5   7 4888.89 982.872   1
  10   5   7 6693.54 1054.83   2
  10   5   7 5646.32 827.224   3
  10  -5  -7 5924.84 944.395   2
 -10  -5   8 683.146 443.229   1
  10   5   8 675.643 391.577   3
 -10  -5   9 2702.84 803.237   1
  10   5   9 2793.17 678.240   3
 -10  -5  10 6368.53 1095.25   1
  10   5  10 5726.75 873.489   3
 -10  -5  11 685.730 544.288   1
  10   5  11 107.575 260.627   3
 -10  -5  12-280.679 366.431   1
  10   5  12 269.170 297.607   3
 -10  -5  13 1237.81 585.559   1
  10   5  13 667.635 434.282   3
 -10  -5  14 4843.88 1029.79   1
  10   5  14 5617.09 969.254   3
 -10  -5  15 4258.71 1016.56   1
  10   5  15 4642.25 896.631   3
 -10  -5  16 540.604 481.527   1
  10   5  16 244.345 438.400   3
 -10  -5  17 472.307 460.081   1
  10   5  17 308.607 386.570   3
 -10  -5  18 373.843 439.672   1
  10   5  18 106.599 531.137   3
  10   6 -11 3899.07 1052.96   2
  10   6 -10 1871.88 859.973   2
  10   6  -9 4172.23 1000.39   2
  10   6  -8 1906.69 849.323   2
  10   6  -7 1176.18 614.991   2
  10   6  -6 2845.72 902.518   2
  10   6  -5 731.797 718.078   2
 -10  -6  -5 848.093 370.383   1
 -10  -6  -4 1961.10 564.940   1
  10   6  -4 2096.77 738.289   2
  10   6  -3 1.88324 384.317   2
 -10  -6  -3 441.626 391.675   1
  10   6  -2 2810.58 747.747   2
 -10  -6  -2 3492.28 710.460   1
  10  -6   1 1444.89 496.973   2
 -10  -6  -1 1889.39 575.024   1
  10   6   0 1582.23 608.460   2
  10  -6   0 1235.57 518.991   2
 -10  -6   0 1418.49 522.283   1
  10  -6  -1 1460.69 609.282   2
  10   6   1 1286.11 657.665   2
  10   6   1 2097.30 546.193   3
 -10  -6   1 2023.76 661.935   1
  10   6   2 2625.98 717.829   2
  10   6   2 3957.87 710.293   3
 -10  -6   2 3936.82 839.199   1
 -10  -6   3 555.284 481.421   1
  10  -6  -3 703.203 394.795   2
  10   6   3 46.9174 450.552   2
  10   6   3 606.192 315.995   3
 -10  -6   4 1920.11 665.626   1
  10   6   4 1649.34 557.702   2
  10   6   4 2326.62 561.170   3
  10  -6  -4 1347.56 436.955   2
 -10  -6   5 621.668 466.680   1
  10   6   5 1788.60 615.269   2
  10   6   5 551.288 341.467   3
  10  -6  -5 1578.59 522.893   2
 -10  -6   6 2192.63 756.208   1
  10   6   6 1591.23 583.128   2
  10   6   6 1656.84 519.696   3
  10  -6  -6 1820.17 614.194   2
 -10  -6   7 1199.87 601.035   1
  10   6   7 1107.29 391.676   3
  10   6   7 2181.09 720.076   2
  10  -6  -7 2739.18 658.344   2
 -10  -6   8 1989.60 752.000   1
  10   6   8 1135.81 454.477   3
  10  -6  -8 2089.28 686.318   2
 -10  -6   9 2983.93 834.938   1
  10   6   9 2376.20 618.867   3
 -10  -6  10 1500.62 681.973   1
  10   6  10 1032.83 485.417   3
 -10  -6  11 4722.71 993.001   1
  10   6  11 5216.05 914.347   3
 -10  -6  12 469.513 459.478   1
  10   6  12 1363.53 540.014   3
 -10  -6  13 804.983 399.931   1
  10   6  13 2328.10 716.519   3
 -10  -6  14 467.819 660.651   1
  10   6  14 569.635 471.901   3
 -10  -6  15 694.985 607.924   1
  10   6  15 810.138 517.575   3
 -10  -6  16 2523.90 850.390   1
  10   6  16 3274.23 775.848   3
  10   7 -13 744.174 738.658   2
  10   7 -12 595.353 584.235   2
  10   7 -11 552.396 624.224   2
  10   7 -10 1866.59 737.928   2
  10   7  -9 878.063 652.310   2
  10   7  -8 1006.05 681.220   2
  10   7  -7 1233.45 570.283   2
  10   7  -6-125.896 415.096   2
  10   7  -5 4911.22 1189.74   2
  10   7  -4 7508.59 1230.72   2
  10   7  -3 782.529 684.433   2
  10   7  -2 1278.86 649.321   2
  10   7  -1 696.404 726.881   2
  10   7   0 2579.95 744.420   2
  10   7   1 492.712 546.727   2
  10   7   2 439.040 378.707   2
  10   7   3 264.176 301.271   3
  10   7   3 94.0821 356.318   2
  10   7   4 6896.19 1231.72   2
  10   7   4 6905.57 980.294   3
  10   7   5 5017.90 826.948   3
  10   7   5 4770.29 966.868   2
  10   7   6 68.2842 279.765   3
  10   7   6 419.557 352.182   2
  10   7   7 1544.96 593.335   3
  10   7   8 1487.21 551.957   3
 -10  -7   8 1652.56 653.891   1
  10   7   9 884.301 463.964   3
 -10  -7   9 1628.43 640.170   1
  10   7  10 2475.78 636.470   3
 -10  -7  10 1292.93 677.937   1
 -10  -7  11-39.0510 361.890   1
  10   7  11 534.456 396.924   3
 -10  -7  12 991.104 638.532   1
  10   7  12 593.714 381.529   3
 -10  -7  13-29.1675 457.720   1
  10   7  13-71.4469 340.381   3
  10   8 -10 261.813 654.660   2
  10   8  -9 1847.90 934.861   2
  10   8  -8 2741.00 841.308   2
  10   8  -7-710.484 519.860   2
  10   8  -6 92.4082 442.697   2
  10   8  -5 1346.66 710.063   2
  10   8  -4 2666.90 845.403   2
  10   8  -3 1064.95 597.998   2
  10   8  -2 570.214 531.828   2
  10   8  -1-380.283 393.520   2
  10   8   0 1773.55 644.746   2
  10   8   1 150.755 537.302   2
  10   8   2 630.245 624.774   2
  10   8   3 2235.19 823.456   2
  10   8   4 4329.83 964.944   2
  10   8   5 1956.37 768.692   2
  10   8   6-70.9134 291.013   3
  10   8   7-261.154 263.607   3
  10   8   8 1893.72 601.825   3
  10   8   9 2206.19 634.092   3
  11   0   0-247.662 359.924   2
  11   0  -1 3288.09 796.459   2
  11   0   1 1188.41 597.054   2
  11   0   2 7232.69 1055.32   2
  11   0  -2 8254.55 1175.30   2
  11   0   3 1727.27 683.151   2
  11   0  -3 1861.06 807.831   2
 -11   0   4 219.186 265.644   1
  11   0  -4 209.816 407.496   2
  11   0   5 1482.21 518.032   2
 -11   0   5 1601.02 469.834   1
  11   0  -5 940.788 524.526   2
  11   0   6 2312.73 650.552   2
  11   0  -6 2531.20 699.065   2
 -11   0   7 3818.82 787.310   1
  11   0   7 3336.09 846.964   2
  11   0  -7 2909.60 830.496   2
  11   0  -8 5112.43 1014.37   2
 -11   0   8 5985.65 974.682   1
 -11   0   9-116.020 276.638   1
 -11   0  10 3483.69 801.119   1
 -11   0  11 510.690 536.945   1
 -11   0  12-130.927 327.472   1
 -11   0  13-13.4057 377.683   1
 -11   0  14 2744.04 747.224   1
 -11   0  15 459.826 465.043   1
 -11   0  16 634.207 473.104   1
 -11   0  17 124.716 538.217   1
 -11   0  18 2268.40 669.215   1
  11   1  -8 5560.04 1298.89   2
  11  -1   7 9029.49 1164.68   2
  11   1  -7 9342.65 1497.57   2
  11  -1   6 6192.08 990.102   2
  11   1  -6 6513.48 1145.58   2
  11  -1   5 868.959 478.257   2
  11   1  -5 447.264 583.584   2
  11  -1   4 2305.22 603.997   2
  11   1  -4 1468.31 548.321   2
  11  -1   3 1366.19 533.574   2
  11   1  -3 795.276 488.079   2
  11  -1   2 1536.89 507.718   2
 -11  -1  -2 2873.95 568.748   1
  11   1  -2 2475.69 654.509   2
  11   1  -1 1752.55 569.088   2
  11  -1   1 2893.27 684.097   2
 -11  -1  -1 3979.25 752.807   1
  11   1   0 373.244 448.254   2
  11  -1   0 498.793 435.164   2
 -11  -1   0 1033.23 426.470   1
  11  -1  -1 3873.84 773.231   2
  11   1   1 3635.52 798.708   2
 -11  -1   1 3540.73 684.747   1
  11   1   2 3342.67 776.115   2
 -11  -1   2 2705.79 590.028   1
  11  -1  -2 1933.28 600.820   2
  11   1   3-593.194 409.209   2
 -11  -1   3-13.1585 252.863   1
  11  -1  -3 427.134 382.906   2
  11   1   4 1178.74 526.239   2
 -11  -1   4 1897.37 565.281   1
  11  -1  -4 1528.01 560.908   2
  11   1   5 489.068 500.950   2
 -11  -1   5 432.978 383.206   1
  11  -1  -5 229.260 436.897   2
 -11  -1   6 6068.42 948.696   1
  11   1   6 4192.42 860.655   2
  11  -1  -6 7878.07 1167.13   2
 -11  -1   7 5108.82 851.031   1
  11   1   7 7683.39 1142.82   2
  11  -1  -7 8613.75 1285.17   2
 -11  -1   8 5413.27 910.596   1
  11   1   8 3908.75 840.697   2
  11  -1  -8 3809.66 927.974   2
 -11  -1   9 738.569 544.211   1
 -11  -1  10 112.454 327.815   1
 -11  -1  11 1426.32 586.264   1
 -11  -1  12 1613.44 492.846   1
 -11  -1  13 1958.96 646.813   1
 -11  -1  14 1182.01 605.975   1
 -11  -1  15 1084.95 542.405   1
 -11  -1  16-606.617 364.871   1
 -11  -1  17 699.123 463.072   1
 -11  -1  18 1759.75 680.421   1
  11   2  -9 767.539 507.190   2
  11   2  -8-329.840 507.732   2
  11   2  -7 2740.30 808.552   2
  11  -2   6 1348.70 536.869   2
  11   2  -6-338.036 381.286   2
  11  -2   5 1853.84 559.293   2
  11   2  -5 1601.82 604.842   2
  11  -2   4 395.279 477.987   2
 -11  -2  -4 742.326 303.276   1
  11   2  -4 1006.27 584.375   2
  11  -2   3 1724.59 595.472   2
 -11  -2  -3 1948.10 475.654   1
  11   2  -3 1631.82 603.263   2
  11   2  -2 7615.02 1151.69   2
  11  -2   2 6887.77 999.585   2
 -11  -2  -2 6817.66 883.320   1
 -11  -2  -1 1690.58 479.995   1
  11   2  -1 924.851 702.777   2
  11  -2   1 2074.68 663.639   2
  11   2   0 3726.75 829.061   2
  11  -2   0 3324.90 694.987   2
 -11  -2   0 4009.69 685.332   1
  11  -2  -1 1454.34 569.346   2
  11   2   1 1526.22 641.098   2
 -11  -2   1 1009.10 397.604   1
  11  -2  -2 6761.08 1005.63   2
  11   2   2 6935.44 1061.40   2
 -11  -2   2 7429.56 1006.99   1
  11   2   3 3012.58 815.294   2
 -11  -2   3 2908.49 644.580   1
  11  -2  -3 1410.21 465.932   2
  11   2   4 1376.93 641.493   2
 -11  -2   4 1548.99 502.501   1
  11  -2  -4 368.669 359.710   2
  11   2   5 1196.58 493.494   2
 -11  -2   5 1651.74 546.420   1
  11  -2  -5 1883.37 557.968   2
  11   2   6-706.199 423.831   2
 -11  -2   6 15.1222 304.772   1
  11  -2  -6 260.198 452.524   2
  11   2   7 3126.96 774.169   2
 -11  -2   7 1794.89 516.467   1
  11  -2  -7 2477.35 758.006   2
  11   2   8 681.575 523.523   2
 -11  -2   8 670.797 396.547   1
  11  -2  -8 616.352 420.493   2
 -11  -2   9 516.997 328.201   1
 -11  -2  10 3992.62 877.414   1
 -11  -2  11 513.389 409.247   1
 -11  -2  12 1938.71 588.917   1
 -11  -2  13 3672.19 856.479   1
 -11  -2  14 1390.99 575.297   1
 -11  -2  15 370.197 448.904   1
 -11  -2  16 824.959 565.583   1
 -11  -2  17 1559.71 598.010   1
 -11  -2  18 1282.84 679.034   1
  11   3 -10 899.120 765.603   2
  11   3  -9 4798.83 1131.69   2
  11   3  -8 8572.54 1475.54   2
  11   3  -7 2490.54 748.651   2
  11   3  -6-373.560 526.038   2
  11  -3   5 1371.70 536.988   2
  11   3  -5 1728.20 1008.46   2
  11  -3   4 6821.03 975.191   2
 -11  -3  -4 5469.54 755.265   1
  11  -3   3 1099.79 476.425   2
 -11  -3  -3 1305.22 407.107   1
  11   3  -3 1603.00 771.000   2
  11   3  -2 347.565 437.056   2
  11  -3   2 891.504 471.576   2
 -11  -3  -2 819.445 370.743   1
  11   3  -1 1070.63 539.318   2
  11  -3   1 1215.17 506.793   2
 -11  -3  -1 1935.75 535.864   1
  11   3   0 1296.33 545.032   2
  11  -3   0 1773.30 547.846   2
 -11  -3   0 1475.84 499.928   1
  11  -3  -1 1484.76 557.958   2
  11   3   1 1378.19 583.164   2
 -11  -3   1 1971.02 524.399   1
  11  -3  -2-374.336 326.188   2
  11   3   2-366.978 461.996   2
 -11  -3   3 997.327 433.103   1
  11   3   3 1178.86 525.824   2
  11  -3  -3 515.300 455.315   2
 -11  -3   4 6929.37 1019.12   1
  11   3   4 6041.11 1003.64   2
  11  -3  -4 6744.38 1036.40   2
 -11  -3   5 1446.79 538.613   1
  11   3   5 1006.99 450.791   2
  11  -3  -5 490.184 487.522   2
 -11  -3   6 500.039 430.093   1
  11   3   6 309.028 426.443   2
 -11  -3   7 3.09170 342.311   1
  11   3   7 985.077 506.716   2
  11  -3  -7 510.179 433.367   2
 -11  -3   8 4020.19 818.295   1
  11   3   8 6989.22 1115.92   2
  11  -3  -8 6873.75 1085.35   2
 -11  -3   9 2562.02 683.968   1
 -11  -3  10 1658.69 605.248   1
 -11  -3  11 203.747 433.231   1
 -11  -3  12 1406.98 688.526   1
 -11  -3  13 370.355 325.613   1
 -11  -3  14 357.883 390.230   1
 -11  -3  15 1241.87 652.905   1
 -11  -3  16 4520.19 905.955   1
 -11  -3  17-371.459 321.169   1
  11   4 -11 585.195 836.113   2
  11   4 -10 1176.41 753.097   2
  11   4  -9 323.530 441.177   2
  11   4  -8-193.420 612.763   2
  11   4  -7 2932.57 856.398   2
  11   4  -6 113.360 590.599   2
  11   4  -5 4343.70 1103.10   2
  11  -4   4 1218.44 493.700   2
  11   4  -4 60.8560 578.042   2
  11   4  -3 1383.50 576.336   2
  11  -4   3 1309.45 460.912   2
 -11  -4  -3 1273.66 436.819   1
  11   4  -2 1447.33 632.167   2
  11  -4   2 143.884 497.670   2
 -11  -4  -2 695.170 370.598   1
  11   4  -1 4148.83 895.098   2
  11  -4   1 5772.91 934.601   2
 -11  -4  -1 4670.86 767.237   1
  11   4   0 2708.72 734.282   2
  11  -4   0 3128.58 744.181   2
 -11  -4   0 2440.64 663.277   1
  11  -4  -1 3566.70 749.423   2
  11   4   1 4436.55 914.429   2
 -11  -4   1 3402.52 684.233   1
  11  -4  -2 187.130 322.877   2
  11   4   2 567.850 603.253   2
 -11  -4   2 1176.89 576.295   1
  11  -4  -3 1478.24 477.014   2
  11   4   3 1207.06 565.562   2
 -11  -4   3 680.143 352.381   1
  11   4   4 412.165 546.372   2
 -11  -4   4 1075.28 477.244   1
  11  -4  -4 1734.91 658.303   2
  11   4   5 3743.87 840.288   2
 -11  -4   5 3683.93 771.758   1
  11  -4  -5 5121.24 928.883   2
  11   4   6 268.994 385.107   2
 -11  -4   6-235.323 399.504   1
  11  -4  -6 582.571 522.570   2
  11   4   7 1981.83 666.137   2
 -11  -4   7 2378.30 666.267   1
  11  -4  -7 3486.87 843.892   2
 -11  -4   8 409.188 393.051   1
  11  -4  -8-132.355 412.341   2
 -11  -4   9 836.100 519.509   1
  11  -4  -9 308.150 491.708   2
 -11  -4  10 1718.62 681.560   1
 -11  -4  11 132.890 333.605   1
 -11  -4  12 326.034 349.638   1
 -11  -4  13 4266.14 989.384   1
 -11  -4  14 1074.48 587.468   1
 -11  -4  15-226.314 653.595   1
  11   5 -12 2472.91 939.974   2
  11   5 -11 300.325 448.196   2
  11   5 -10 767.351 802.514   2
  11   5  -9 228.877 519.193   2
  11   5  -8 3303.32 1006.13   2
  11   5  -7 2029.49 807.682   2
  11   5  -6 1417.58 828.732   2
  11   5  -5 1971.40 682.455   2
  11   5  -4 5291.54 1113.44   2
  11   5  -3 2496.80 796.195   2
  11  -5   3 4255.66 822.977   2
 -11  -5  -3 2612.80 649.713   1
  11   5  -2 85.9649 518.531   2
  11  -5   2 1153.16 602.525   2
 -11  -5  -2 292.662 388.145   1
  11   5  -1 632.058 549.991   2
  11  -5   1 1033.87 477.382   2
 -11  -5  -1 1705.12 541.287   1
  11   5   0 8.45390 337.117   2
  11  -5   0 540.189 397.238   2
 -11  -5   0 866.687 468.860   1
  11  -5  -1 1261.43 490.009   2
  11   5   1 1563.63 589.558   2
 -11  -5   1 1046.44 532.802   1
  11  -5  -2 22.2810 296.400   2
  11   5   2-1054.54 582.712   2
 -11  -5   2-113.304 364.602   1
  11  -5  -3 2460.85 758.981   2
  11   5   3 3388.21 837.525   2
 -11  -5   3 2467.94 656.060   1
  11   5   3 2504.19 565.520   3
  11   5   4 5066.34 1092.26   2
 -11  -5   4 5604.96 986.507   1
  11   5   4 4622.60 754.901   3
  11  -5  -4 5180.93 973.608   2
  11   5   5 2341.76 894.282   2
 -11  -5   5 1814.64 602.085   1
  11   5   5 2610.85 603.443   3
  11  -5  -5 3425.43 775.608   2
  11   5   6 1440.48 703.610   2
 -11  -5   6 437.221 401.844   1
  11   5   6 278.705 329.889   3
  11  -5  -6 77.1513 429.356   2
 -11  -5   7 1175.06 653.921   1
  11   5   7 611.575 492.306   2
  11   5   7 463.849 337.658   3
  11  -5  -7 2074.06 757.872   2
 -11  -5   8 5032.63 1068.33   1
  11   5   8 3912.86 749.962   3
  11  -5  -8 4396.03 958.564   2
 -11  -5   9 1490.89 627.858   1
  11   5   9 545.829 380.236   3
  11  -5  -9 435.940 474.786   2
 -11  -5  10 355.797 463.171   1
  11   5  10-101.805 421.308   3
 -11  -5  11 1014.94 526.030   1
  11   5  11 1077.81 486.556   3
 -11  -5  12 2134.01 765.564   1
  11   5  12 1690.16 588.924   3
  11   5  13 704.612 467.851   3
 -11  -5  13 1095.92 564.520   1
  11   5  14 530.106 336.474   3
  11   6 -11 945.187 739.053   2
  11   6 -10 4018.22 1065.22   2
  11   6  -9 575.648 655.204   2
  11   6  -8-5.00942 407.935   2
  11   6  -7 788.335 629.141   2
  11   6  -6 842.987 567.786   2
  11   6  -5 464.212 598.632   2
  11   6  -4 749.413 537.458   2
  11   6  -3 2097.25 890.225   2
  11   6  -2 2803.63 1051.21   2
 -11  -6  -2 2542.48 681.766   1
  11   6  -1 4062.04 946.637   2
 -11  -6  -1 3695.89 791.661   1
  11   6   0 3351.12 1019.30   2
 -11  -6   0 2179.61 672.167   1
 -11  -6   1 4220.75 891.873   1
  11   6   1 3500.30 998.443   2
 -11  -6   2 2390.89 706.844   1
  11   6   2 2394.75 724.751   2
 -11  -6   3 727.654 439.251   1
  11   6   3 612.668 475.605   2
 -11  -6   4 889.406 495.834   1
  11   6   4 765.340 509.157   2
 -11  -6   5 556.248 470.887   1
  11   6   5 1481.69 633.014   2
  11   6   5 1798.12 497.710   3
 -11  -6   6 376.168 435.799   1
  11   6   6 1136.47 495.091   3
  11   6   6 428.179 447.186   2
 -11  -6   7 1161.34 592.805   1
  11   6   7 345.954 262.311   3
 -11  -6   8 189.735 425.336   1
  11   6   8 660.953 422.865   3
 -11  -6   9 1121.66 617.840   1
  11   6   9 1236.29 502.527   3
 -11  -6  10 2403.91 800.955   1
  11   6  10 3418.55 782.853   3
 -11  -6  11 1685.42 661.471   1
  11   6  11 1672.34 555.735   3
  11   7  -6 1962.62 845.320   2
  11   7  -5 2413.22 930.672   2
  11   7  -4 795.314 626.039   2
  11   7  -3 695.488 746.192   2
  11   7  -2 1215.34 634.809   2
 -11  -7  -1 3096.47 760.827   1
  11   7  -1 2200.22 725.484   2
 -11  -7   0 884.971 526.852   1
  11   7   0 146.953 692.644   2
 -11  -7   1 3316.74 844.751   1
  11   7   1 3305.64 855.534   2
 -11  -7   2 518.869 389.219   1
  11   7   2 125.092 598.719   2
 -11  -7   3 257.648 400.478   1
  11   7   3 485.871 542.345   2
 -11  -7   4 704.676 499.624   1
  11   7   4 2000.79 728.931   2
 -11  -7   5 1287.76 657.429   1
  11   7   5 2548.64 874.957   2
 -11  -7   6 2544.22 825.579   1
  11   7   6 1957.08 789.826   2
  12   0   0 1392.75 610.616   2
  12   0  -1 68.0005 320.579   2
  12   0   1 617.629 482.939   2
  12   0  -2-416.672 401.147   2
  12   0   2 223.053 410.611   2
  12   0  -3-133.892 363.073   2
  12   0   3 260.817 285.102   2
  12   0   4-218.487 381.506   2
  12   0  -4 108.578 319.395   2
  12   0   5-222.226 402.809   2
  12   0  -5 549.399 503.070   2
  12   0   6 857.812 576.154   2
  12   0  -6 999.859 668.625   2
  12   0   7 3409.79 775.954   2
  12   0  -7 4829.23 1012.51   2
  12   0  -8 2307.89 1000.12   2
 -12   0   8 1852.25 616.458   1
  12   0  -9 630.427 678.551   2
 -12   0   9 391.933 448.414   1
 -12   0  10 2597.35 734.412   1
  12   0 -10 3587.74 1088.13   2
 -12   0  11 2270.99 744.951   1
 -12   0  12 304.615 476.283   1
 -12   0  13 2010.47 667.684   1
  12   1 -11 2280.88 1130.66   2
  12   1 -10 3555.79 985.767   2
  12   1  -9 1558.28 870.752   2
  12   1  -8 3256.36 977.060   2
  12   1  -7 2969.06 944.519   2
  12  -1   6 565.114 405.183   2
  12   1  -6 2176.89 783.692   2
  12  -1   5 471.418 556.737   2
  12   1  -5 113.342 663.267   2
  12  -1   4 6514.65 1052.02   2
  12   1  -4 6145.68 1142.90   2
  12   1  -3 2645.71 782.705   2
  12  -1   3 1838.67 617.868   2
  12   1  -2 1961.53 733.324   2
  12  -1   2 1197.68 558.448   2
  12   1  -1 209.073 431.450   2
  12  -1   1 441.947 379.692   2
  12   1   0-296.751 407.229   2
  12  -1   0-300.124 304.919   2
  12  -1  -1 396.879 457.049   2
  12   1   1 219.419 361.924   2
 -12  -1   1 1174.72 455.422   1
  12  -1  -2 1314.71 596.572   2
  12   1   2 1562.68 640.254   2
 -12  -1   2 2205.63 632.899   1
  12  -1  -3 2142.83 688.993   2
  12   1   3 3090.18 800.987   2
 -12  -1   3 2168.12 610.303   1
  12   1   4 6265.34 1054.88   2
 -12  -1   4 5849.24 972.907   1
  12  -1  -4 6610.24 1108.86   2
  12   1   5-129.454 507.496   2
 -12  -1   5 422.414 354.257   1
  12  -1  -5 101.633 629.570   2
 -12  -1   6 362.435 365.016   1
  12   1   6 560.785 440.247   2
 -12  -1   7 2123.13 574.686   1
  12   1   7 1483.44 606.384   2
  12  -1  -7 3249.21 922.992   2
  12  -1  -8 3605.18 1026.37   2
 -12  -1   8 3382.07 759.085   1
  12  -1  -9 1632.39 927.163   2
 -12  -1   9 1044.09 521.865   1
  12  -1 -10 2966.49 946.359   2
 -12  -1  10 2869.80 755.605   1
 -12  -1  11 2386.57 755.760   1
 -12  -1  12-18.1428 392.342   1
 -12  -1  13 2114.52 613.979   1
  12   2 -11 4146.06 1227.45   2
  12   2 -10 1777.36 817.486   2
  12   2  -9 286.112 490.849   2
  12   2  -8 1038.74 741.977   2
  12   2  -7 2373.91 789.080   2
  12  -2   6 931.342 498.215   2
  12   2  -6 1597.06 702.890   2
  12  -2   5 440.200 396.779   2
  12   2  -5-5.22191 378.232   2
  12  -2   4 347.399 382.347   2
  12   2  -4 589.039 478.868   2
  12   2  -3 537.106 867.645   2
  12  -2   3 1151.43 710.164   2
  12   2  -2 6364.93 1160.43   2
  12  -2   2 4593.54 868.900   2
  12   2  -1 820.740 603.791   2
  12  -2   1 648.281 459.274   2
 -12  -2  -1 1342.35 494.315   1
  12   2   0 3803.79 844.316   2
  12  -2   0 4223.43 829.764   2
 -12  -2   0 4467.74 772.520   1
  12  -2  -1 493.349 581.385   2
  12   2   1-517.942 645.458   2
 -12  -2   1 419.524 406.780   1
  12  -2  -2 4649.89 925.710   2
  12   2   2 4885.63 1031.09   2
 -12  -2   2 4961.34 854.032   1
  12  -2  -3 900.500 568.551   2
 -12  -2   3 1272.83 544.026   1
  12   2   3 832.235 579.225   2
 -12  -2   4-72.2647 287.728   1
  12   2   4 509.056 416.964   2
  12  -2  -4 551.854 407.586   2
[truncated: 15,915 more chars]
